# Supplementary material for: Synthesis of spiro isoindolinone-indolines and 1,2-disubstituted indoles from 2-iodobenzamide derivatives
Source: Royal Society of Chemistry journal article supplement (doi:10.1039/c6ra15002k), 2016-01-01
Supplement: c6ra15002k1.pdf [file c6ra15002k1.pdf]

## Supporting Information

### Synthesis of Spiro Isoindolinone-indolines and 1,2-Disubstituted

### Indoles from 2-Iodobenzamide derivatives

Bharath Kumar Villuri, Trimurtulu Kotipalli, Veerababurao kavala, Sachin S. Ichake,  
Vijayalakshmi Bandi, Chun-Wei Kuo, Ching-Fa Yao\*

#### Table of Contents

|                                                |               |
|------------------------------------------------|---------------|
| <b>1. X-ray Crystallographic Structures</b>    | <b>2-13</b>   |
| <b>2. <sup>1</sup>H and <sup>13</sup>C NMR</b> | <b>14-124</b> |

## 1. Crystal structure of compound (6h)

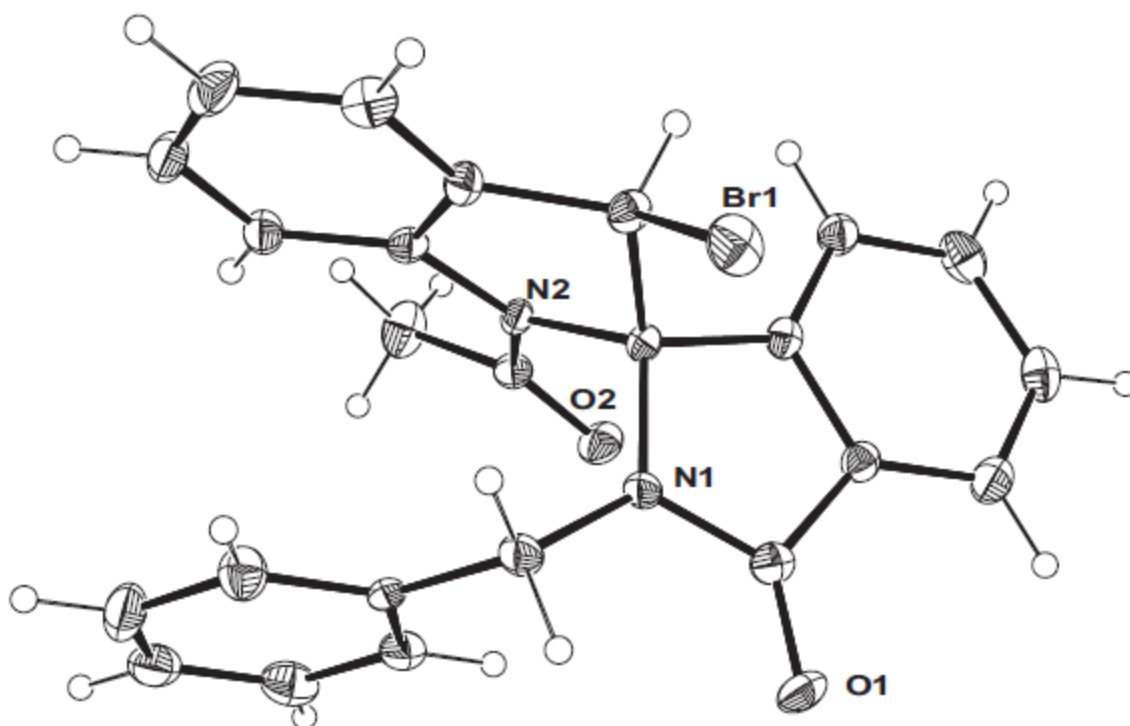

Table 1. Crystal data and structure refinement for a17131. CCDC 1484057

|                      |                                                                  |                  |
|----------------------|------------------------------------------------------------------|------------------|
| Identification code  | a17131                                                           |                  |
| Empirical formula    | C <sub>24</sub> H <sub>19</sub> Br N <sub>2</sub> O <sub>2</sub> |                  |
| Formula weight       | 447.32                                                           |                  |
| Temperature          | 200(2) K                                                         |                  |
| Wavelength           | 0.71073 Å                                                        |                  |
| Crystal system       | Triclinic                                                        |                  |
| Space group          | P -1                                                             |                  |
| Unit cell dimensions | a = 7.2109(5) Å                                                  | α = 92.017(4)°.  |
|                      | b = 8.7771(5) Å                                                  | β = 100.699(4)°. |

|                                 |                                                           |                               |
|---------------------------------|-----------------------------------------------------------|-------------------------------|
|                                 | $c = 16.7382(12) \text{ \AA}$                             | $\gamma = 105.215(3)^\circ$ . |
| Volume                          | 1000.53(11) $\text{\AA}^3$                                |                               |
| Z                               | 2                                                         |                               |
| Density (calculated)            | 1.485 $\text{Mg/m}^3$                                     |                               |
| Absorption coefficient          | 2.077 $\text{mm}^{-1}$                                    |                               |
| F(000)                          | 456                                                       |                               |
| Crystal size                    | 0.17 x 0.05 x 0.03 $\text{mm}^3$                          |                               |
| Theta range for data collection | 2.41 to 25.00°.                                           |                               |
| Index ranges                    | $-8 \leq h \leq 6, -9 \leq k \leq 10, -11 \leq l \leq 19$ |                               |
| Reflections collected           | 7092                                                      |                               |
| Independent reflections         | 3465 [R(int) = 0.0376]                                    |                               |
| Completeness to theta = 24.92°  | 98.9 %                                                    |                               |
| Absorption correction           | multi-scan                                                |                               |
| Max. and min. transmission      | 0.9403 and 0.7190                                         |                               |
| Refinement method               | Full-matrix least-squares on $F^2$                        |                               |
| Data / restraints / parameters  | 3465 / 0 / 262                                            |                               |
| Goodness-of-fit on $F^2$        | 0.977                                                     |                               |
| Final R indices [I > 2sigma(I)] | R1 = 0.0511, wR2 = 0.1029                                 |                               |
| R indices (all data)            | R1 = 0.0844, wR2 = 0.1122                                 |                               |
| Largest diff. peak and hole     | 0.551 and -0.443 $\text{e.\AA}^{-3}$                      |                               |

## 2. Crystal structure of compound (6n1)

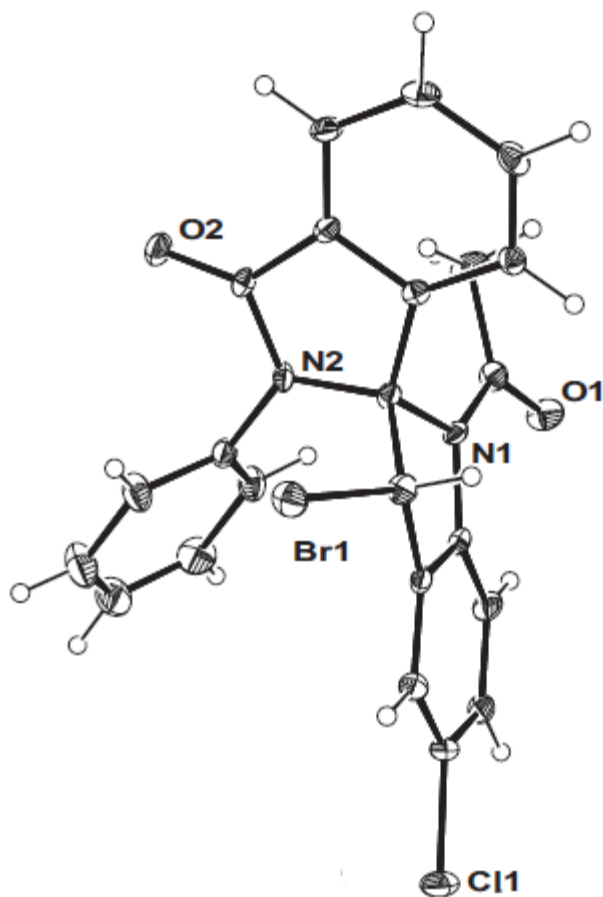

Table 1. Crystal data and structure refinement for a17746. CCDC 1484059

|                     |                                                                     |
|---------------------|---------------------------------------------------------------------|
| Identification code | a17746                                                              |
| Empirical formula   | C <sub>23</sub> H <sub>16</sub> Br Cl N <sub>2</sub> O <sub>2</sub> |
| Formula weight      | 467.74                                                              |
| Temperature         | 200(2) K                                                            |
| Wavelength          | 0.71073 Å                                                           |
| Crystal system      | Orthorhombic                                                        |
| Space group         | P c a 21                                                            |

|                                   |                                             |          |
|-----------------------------------|---------------------------------------------|----------|
| Unit cell dimensions              | a = 17.3513(3) Å                            | α = 90°. |
|                                   | b = 14.2331(2) Å                            | β = 90°. |
|                                   | c = 15.8822(2) Å                            | γ = 90°. |
| Volume                            | 3922.31(10) Å <sup>3</sup>                  |          |
| Z                                 | 8                                           |          |
| Density (calculated)              | 1.584 Mg/m <sup>3</sup>                     |          |
| Absorption coefficient            | 2.255 mm <sup>-1</sup>                      |          |
| F(000)                            | 1888                                        |          |
| Crystal size                      | 0.27 x 0.15 x 0.06 mm <sup>3</sup>          |          |
| Theta range for data collection   | 1.43 to 25.03°.                             |          |
| Index ranges                      | -20 ≤ h ≤ 20, -16 ≤ k ≤ 16, -18 ≤ l ≤ 18    |          |
| Reflections collected             | 27566                                       |          |
| Independent reflections           | 6579 [R(int) = 0.0495]                      |          |
| Completeness to theta = 25.03°    | 99.8 %                                      |          |
| Absorption correction             | multi-scan                                  |          |
| Max. and min. transmission        | 0.8766 and 0.5811                           |          |
| Refinement method                 | Full-matrix least-squares on F <sup>2</sup> |          |
| Data / restraints / parameters    | 6579 / 1 / 523                              |          |
| Goodness-of-fit on F <sup>2</sup> | 1.031                                       |          |
| Final R indices [I > 2σ(I)]       | R1 = 0.0481, wR2 = 0.1126                   |          |
| R indices (all data)              | R1 = 0.0591, wR2 = 0.1182                   |          |
| Absolute structure parameter      | 0.485(11)                                   |          |
| Largest diff. peak and hole       | 1.720 and -0.497 e.Å <sup>-3</sup>          |          |

### 3. Crystal structure of compound (6n)

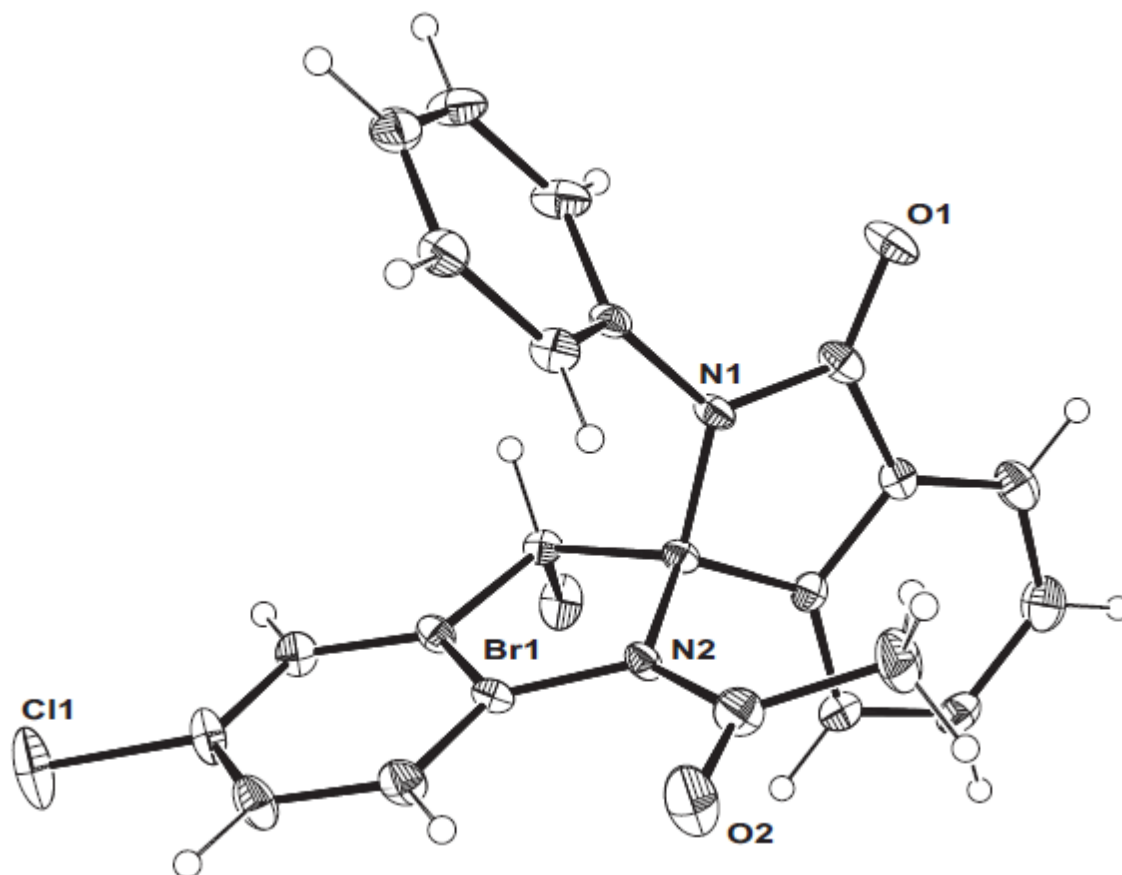

Table 1. Crystal data and structure refinement for a17747. CCDC 1484060

|                     |                                                                     |
|---------------------|---------------------------------------------------------------------|
| Identification code | a17747                                                              |
| Empirical formula   | C <sub>23</sub> H <sub>16</sub> Br Cl N <sub>2</sub> O <sub>2</sub> |
| Formula weight      | 467.74                                                              |
| Temperature         | 200(2) K                                                            |
| Wavelength          | 0.71073 Å                                                           |
| Crystal system      | Orthorhombic                                                        |
| Space group         | P 21 21 21                                                          |

|                                   |                                             |          |
|-----------------------------------|---------------------------------------------|----------|
| Unit cell dimensions              | a = 7.8972(3) Å                             | α = 90°. |
|                                   | b = 15.0212(6) Å                            | β = 90°. |
|                                   | c = 16.9789(5) Å                            | γ = 90°. |
| Volume                            | 2014.13(13) Å <sup>3</sup>                  |          |
| Z                                 | 4                                           |          |
| Density (calculated)              | 1.542 Mg/m <sup>3</sup>                     |          |
| Absorption coefficient            | 2.196 mm <sup>-1</sup>                      |          |
| F(000)                            | 944                                         |          |
| Crystal size                      | 0.77 x 0.26 x 0.08 mm <sup>3</sup>          |          |
| Theta range for data collection   | 1.81 to 25.02°.                             |          |
| Index ranges                      | -8 ≤ h ≤ 9, -11 ≤ k ≤ 17, -20 ≤ l ≤ 20      |          |
| Reflections collected             | 11832                                       |          |
| Independent reflections           | 3489 [R(int) = 0.0347]                      |          |
| Completeness to theta = 25.02°    | 99.8 %                                      |          |
| Absorption correction             | multi-scan                                  |          |
| Max. and min. transmission        | 0.8439 and 0.2827                           |          |
| Refinement method                 | Full-matrix least-squares on F <sup>2</sup> |          |
| Data / restraints / parameters    | 3489 / 0 / 262                              |          |
| Goodness-of-fit on F <sup>2</sup> | 1.029                                       |          |
| Final R indices [I > 2σ(I)]       | R1 = 0.0333, wR2 = 0.0681                   |          |
| R indices (all data)              | R1 = 0.0436, wR2 = 0.0719                   |          |
| Absolute structure parameter      | 0.00                                        |          |
| Largest diff. peak and hole       | 0.353 and -0.281 e.Å <sup>-3</sup>          |          |

#### 4. Crystal structure of compound (6m)

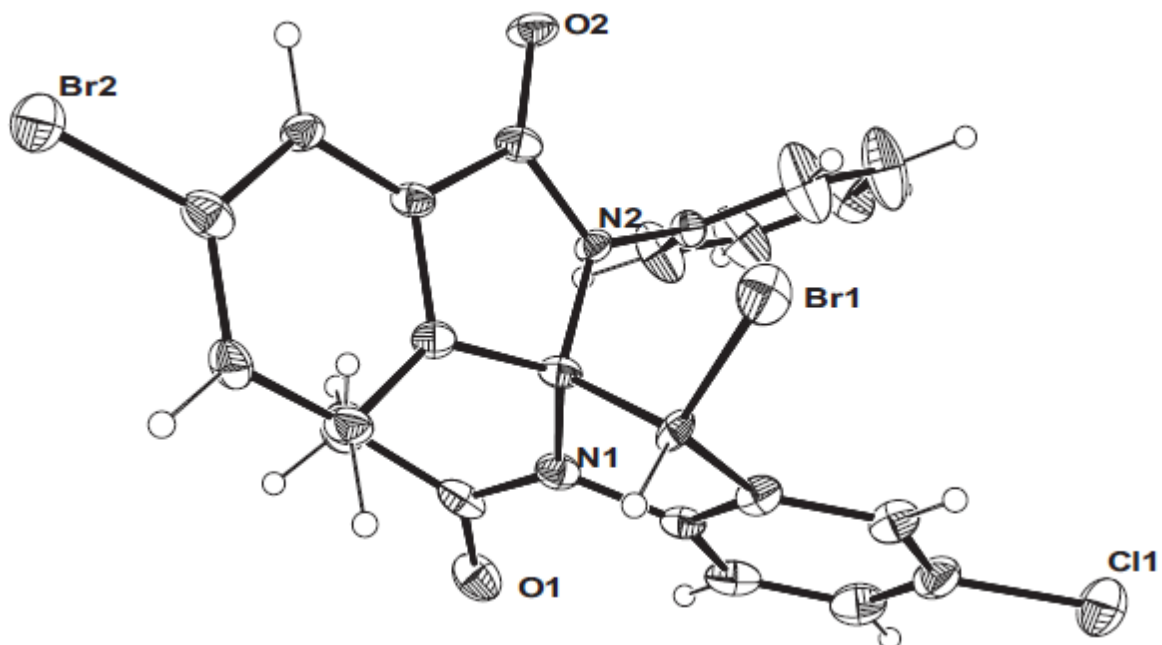

Table 1. Crystal data and structure refinement for a17291. CCDC 1484058

|                      |                                                                                  |                  |
|----------------------|----------------------------------------------------------------------------------|------------------|
| Identification code  | a17291                                                                           |                  |
| Empirical formula    | C <sub>23</sub> H <sub>15</sub> Br <sub>2</sub> Cl N <sub>2</sub> O <sub>2</sub> |                  |
| Formula weight       | 546.64                                                                           |                  |
| Temperature          | 200(2) K                                                                         |                  |
| Wavelength           | 0.71073 Å                                                                        |                  |
| Crystal system       | Monoclinic                                                                       |                  |
| Space group          | P 2 <sub>1</sub> /n                                                              |                  |
| Unit cell dimensions | a = 9.6989(16) Å                                                                 | α = 90°.         |
|                      | b = 15.284(3) Å                                                                  | β = 102.462(6)°. |
|                      | c = 15.014(3) Å                                                                  | γ = 90°.         |
| Volume               | 2173.2(7) Å <sup>3</sup>                                                         |                  |
| Z                    | 4                                                                                |                  |
| Density (calculated) | 1.671 Mg/m <sup>3</sup>                                                          |                  |



|                                   |                                             |
|-----------------------------------|---------------------------------------------|
| Absorption coefficient            | 3.876 mm <sup>-1</sup>                      |
| F(000)                            | 1080                                        |
| Crystal size                      | 0.20 x 0.17 x 0.03 mm <sup>3</sup>          |
| Theta range for data collection   | 2.29 to 25.22°.                             |
| Index ranges                      | -10<=h<=11, -18<=k<=13, -15<=l<=17          |
| Reflections collected             | 12408                                       |
| Independent reflections           | 3834 [R(int) = 0.0500]                      |
| Completeness to theta = 25.22°    | 97.6 %                                      |
| Absorption correction             | multi-scan                                  |
| Max. and min. transmission        | 0.8926 and 0.5112                           |
| Refinement method                 | Full-matrix least-squares on F <sup>2</sup> |
| Data / restraints / parameters    | 3834 / 0 / 271                              |
| Goodness-of-fit on F <sup>2</sup> | 1.183                                       |
| Final R indices [I>2sigma(I)]     | R1 = 0.0552, wR2 = 0.1310                   |
| R indices (all data)              | R1 = 0.0920, wR2 = 0.1728                   |
| Largest diff. peak and hole       | 1.063 and -1.783 e.Å <sup>-3</sup>          |

## 5. Crystal structure of compound (5a)

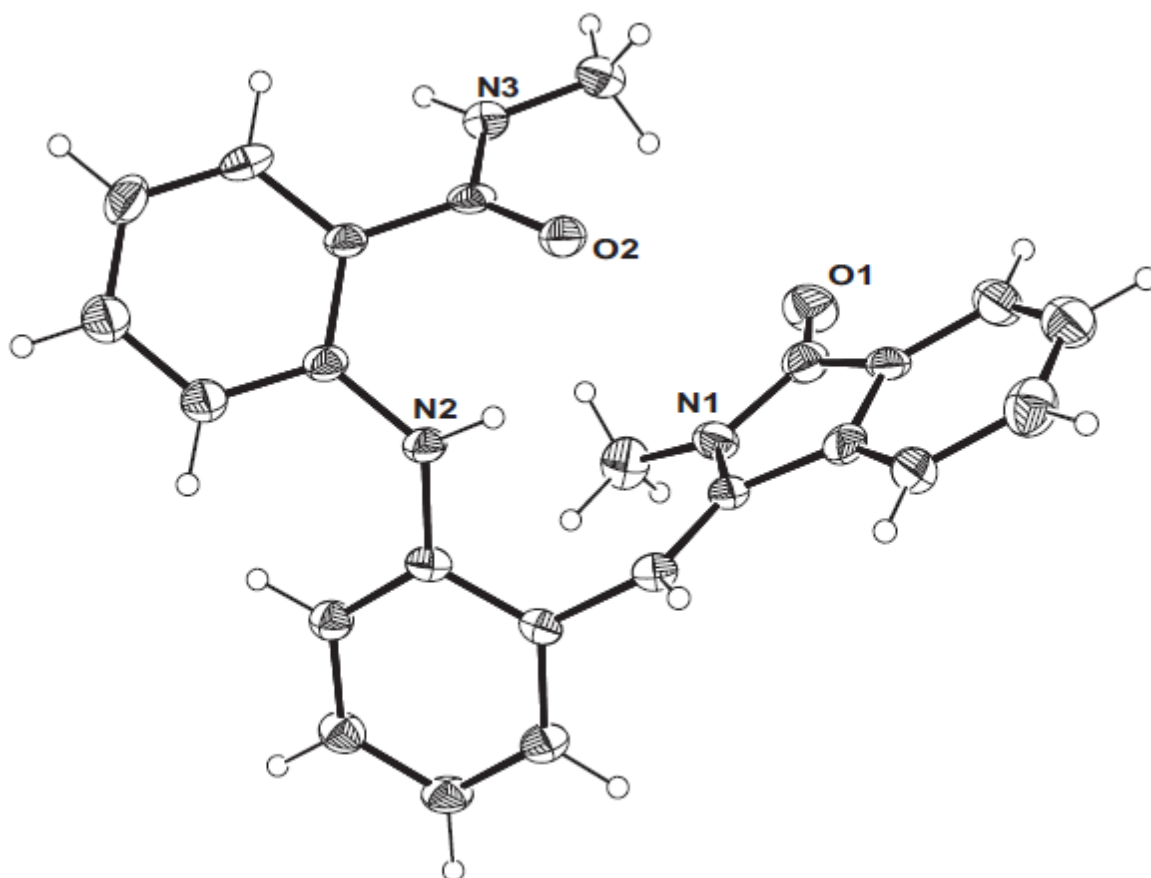

Table 1. Crystal data and structure refinement for a16869. CCDC 1484056

|                     |                                                               |
|---------------------|---------------------------------------------------------------|
| Identification code | a16869                                                        |
| Empirical formula   | C <sub>24</sub> H <sub>21</sub> N <sub>3</sub> O <sub>2</sub> |
| Formula weight      | 383.44                                                        |
| Temperature         | 200(2) K                                                      |
| Wavelength          | 0.71073 Å                                                     |
| Crystal system      | Monoclinic                                                    |
| Space group         | P 21/c                                                        |

|                                   |                                             |                             |
|-----------------------------------|---------------------------------------------|-----------------------------|
| Unit cell dimensions              | a = 10.813(3) Å                             | $\alpha = 90^\circ$ .       |
|                                   | b = 20.064(9) Å                             | $\beta = 90.695(9)^\circ$ . |
|                                   | c = 8.964(3) Å                              | $\gamma = 90^\circ$ .       |
| Volume                            | 1944.7(12) Å <sup>3</sup>                   |                             |
| Z                                 | 4                                           |                             |
| Density (calculated)              | 1.310 Mg/m <sup>3</sup>                     |                             |
| Absorption coefficient            | 0.085 mm <sup>-1</sup>                      |                             |
| F(000)                            | 808                                         |                             |
| Crystal size                      | 0.37 x 0.29 x 0.03 mm <sup>3</sup>          |                             |
| Theta range for data collection   | 2.49 to 25.07°.                             |                             |
| Index ranges                      | -12<=h<=12, -23<=k<=23, -10<=l<=6           |                             |
| Reflections collected             | 13224                                       |                             |
| Independent reflections           | 3422 [R(int) = 0.1028]                      |                             |
| Completeness to theta = 25.07°    | 99.3 %                                      |                             |
| Absorption correction             | multi-scan                                  |                             |
| Max. and min. transmission        | 0.9975 and 0.9693                           |                             |
| Refinement method                 | Full-matrix least-squares on F <sup>2</sup> |                             |
| Data / restraints / parameters    | 3422 / 0 / 262                              |                             |
| Goodness-of-fit on F <sup>2</sup> | 1.010                                       |                             |
| Final R indices [I>2sigma(I)]     | R1 = 0.0724, wR2 = 0.1622                   |                             |
| R indices (all data)              | R1 = 0.1674, wR2 = 0.2088                   |                             |
| Largest diff. peak and hole       | 0.497 and -0.283 e.Å <sup>-3</sup>          |                             |

## 6. Crystal structure of compound (8c)

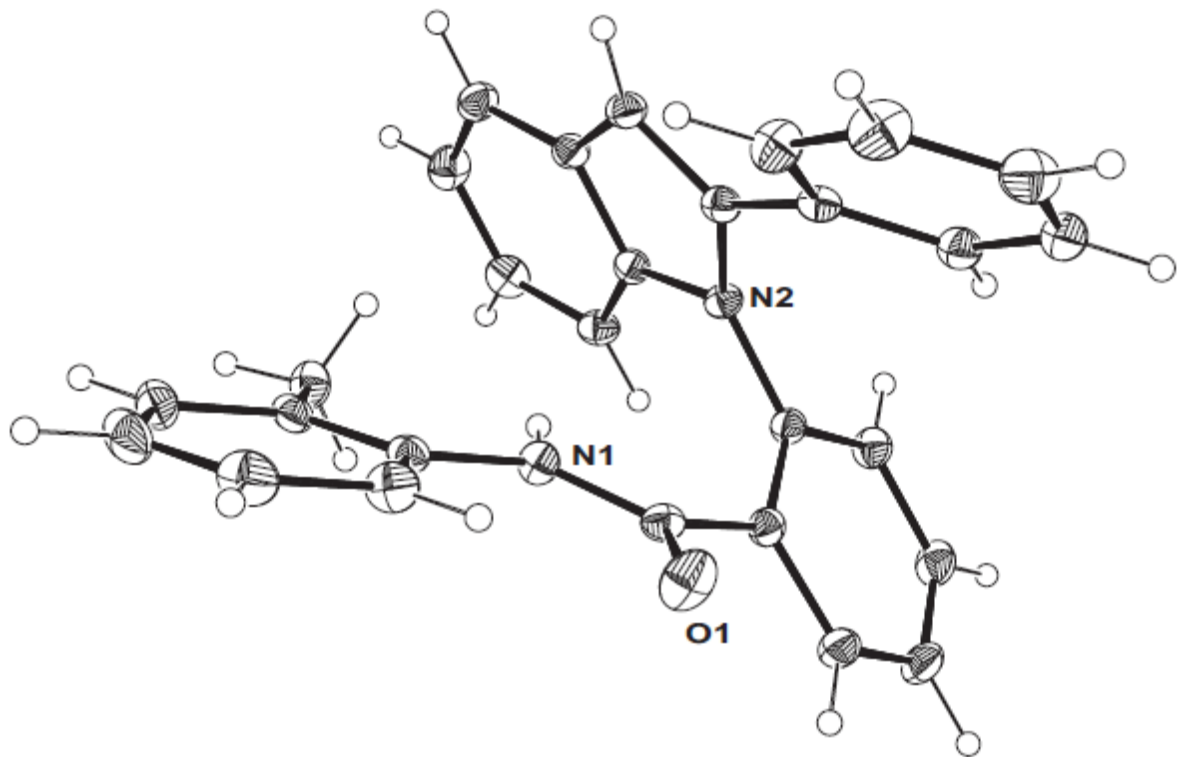

Table 1. Crystal data and structure refinement for a17965. CCDC 1484060

|                      |                                                  |                 |
|----------------------|--------------------------------------------------|-----------------|
| Identification code  | a17965                                           |                 |
| Empirical formula    | C <sub>28</sub> H <sub>22</sub> N <sub>2</sub> O |                 |
| Formula weight       | 402.48                                           |                 |
| Temperature          | 200(2) K                                         |                 |
| Wavelength           | 0.71073 Å                                        |                 |
| Crystal system       | Triclinic                                        |                 |
| Space group          | P -1                                             |                 |
| Unit cell dimensions | a = 9.8696(5) Å                                  | α = 96.056(2)°. |
|                      | b = 10.1071(5) Å                                 | β = 94.649(3)°. |
|                      | c = 10.6037(4) Å                                 | γ = 98.442(3)°. |
| Volume               | 1035.43(8) Å <sup>3</sup>                        |                 |

|                                   |                                             |
|-----------------------------------|---------------------------------------------|
| Z                                 | 2                                           |
| Density (calculated)              | 1.291 Mg/m <sup>3</sup>                     |
| Absorption coefficient            | 0.079 mm <sup>-1</sup>                      |
| F(000)                            | 424                                         |
| Crystal size                      | 0.24 x 0.20 x 0.07 mm <sup>3</sup>          |
| Theta range for data collection   | 1.94 to 25.04°.                             |
| Index ranges                      | -11<=h<=11, -12<=k<=11, -12<=l<=12          |
| Reflections collected             | 8156                                        |
| Independent reflections           | 3618 [R(int) = 0.0231]                      |
| Completeness to theta = 25.04°    | 98.9 %                                      |
| Absorption correction             | multi-scan                                  |
| Max. and min. transmission        | 0.9945 and 0.9814                           |
| Refinement method                 | Full-matrix least-squares on F <sup>2</sup> |
| Data / restraints / parameters    | 3618 / 0 / 280                              |
| Goodness-of-fit on F <sup>2</sup> | 1.033                                       |
| Final R indices [I>2sigma(I)]     | R1 = 0.0372, wR2 = 0.0903                   |
| R indices (all data)              | R1 = 0.0470, wR2 = 0.0971                   |
| Largest diff. peak and hole       | 0.163 and -0.165 e.Å <sup>-3</sup>          |

# **Spectra copies of 4a-4n, 5a, 6a-6p and 8a-8w**

3-(2-aminobenzylidene)-2-methylisoindolin-1-one (4a)

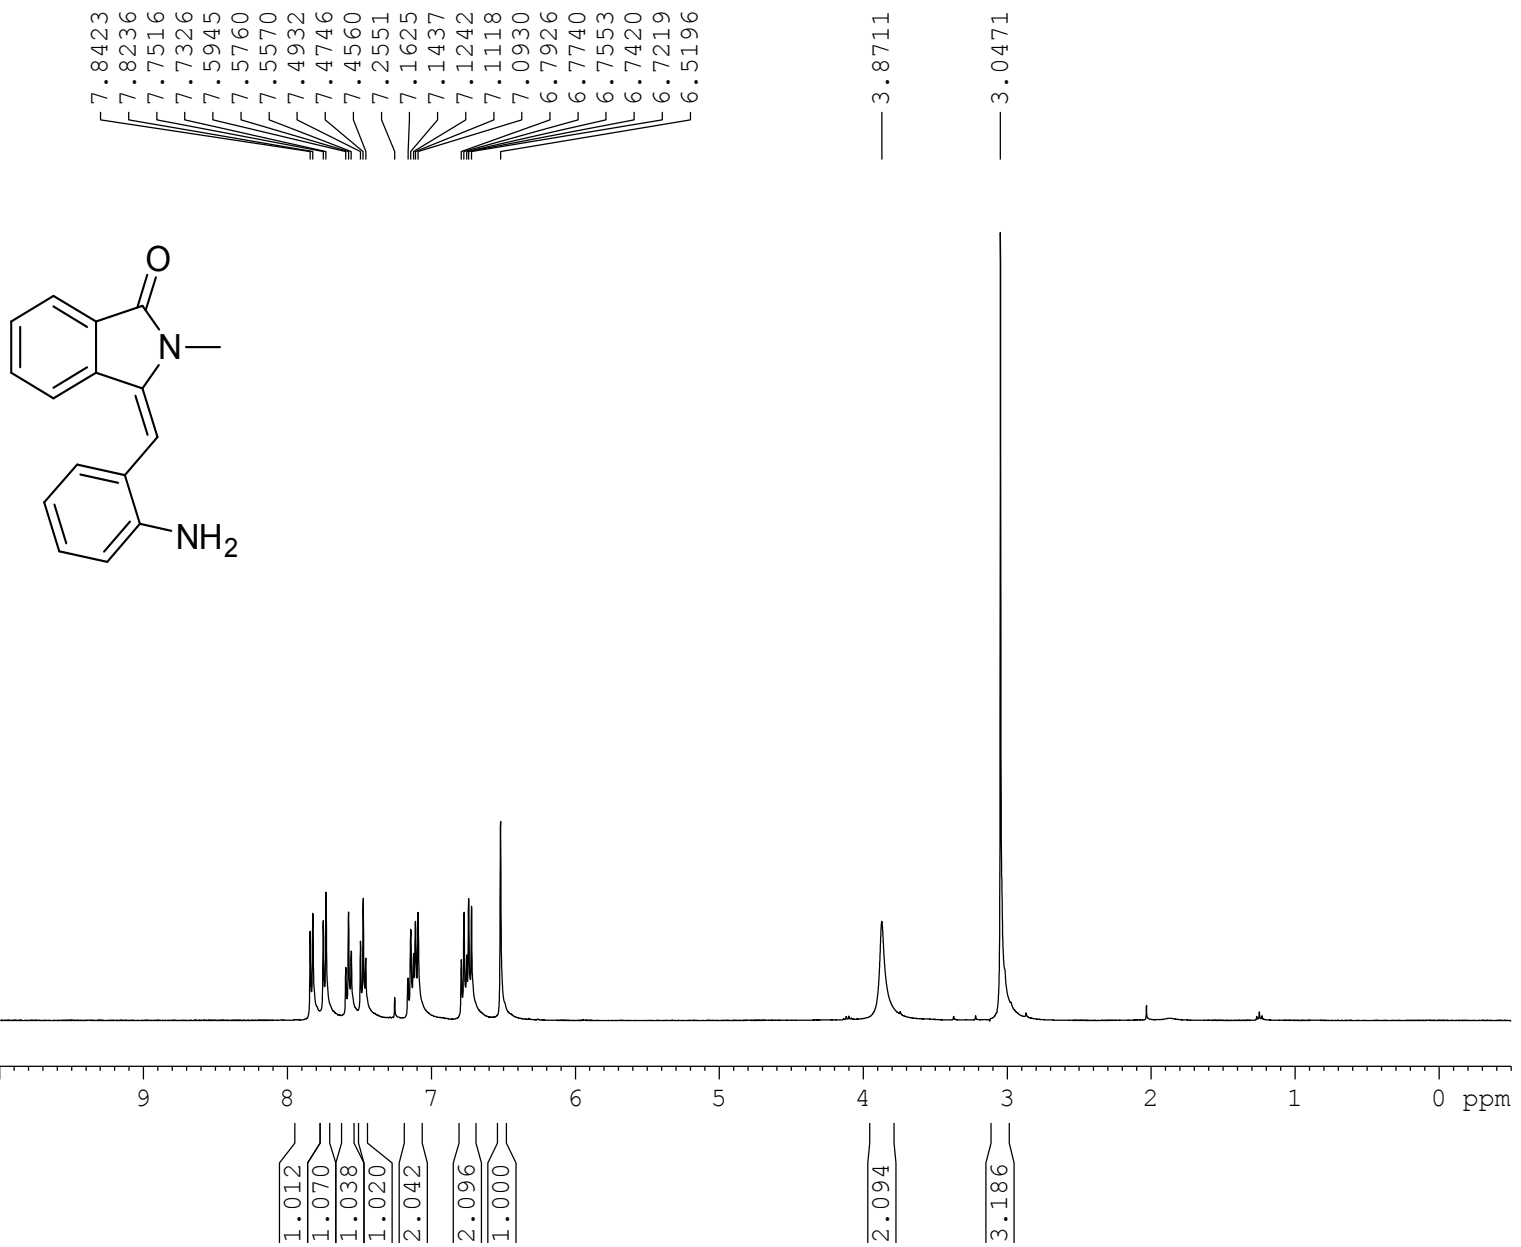

Current Data Parameters  
 NAME isoindolones  
 EXPNO 25  
 PROCNO 1

F2 - Acquisition Parameters  
 Date\_ 20160201  
 Time 15.17  
 INSTRUM spect  
 PROBHD 5 mm BBO BB-1H  
 PULPROG zg30  
 TD 32768  
 SOLVENT CDCl3  
 NS 32  
 DS 0  
 SWH 7246.377 Hz  
 FIDRES 0.221142 Hz  
 AQ 2.2609921 sec  
 RG 71.8  
 DW 69.000 usec  
 DE 6.50 usec  
 TE 297.7 K  
 D1 2.00000000 sec  
 TD0 1

===== CHANNEL f1 =====  
 NUC1 1H  
 P1 14.40 usec  
 PL1 1.80 dB  
 SFO1 400.1324008 MHz

F2 - Processing parameters  
 SI 16384  
 SF 400.1300118 MHz  
 WDW EM  
 SSB 0  
 LB 0 Hz  
 GB 0  
 PC 1.00

3-(2-aminobenzylidene)-2-methylisoindolin-1-one (4a)

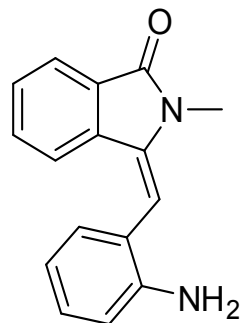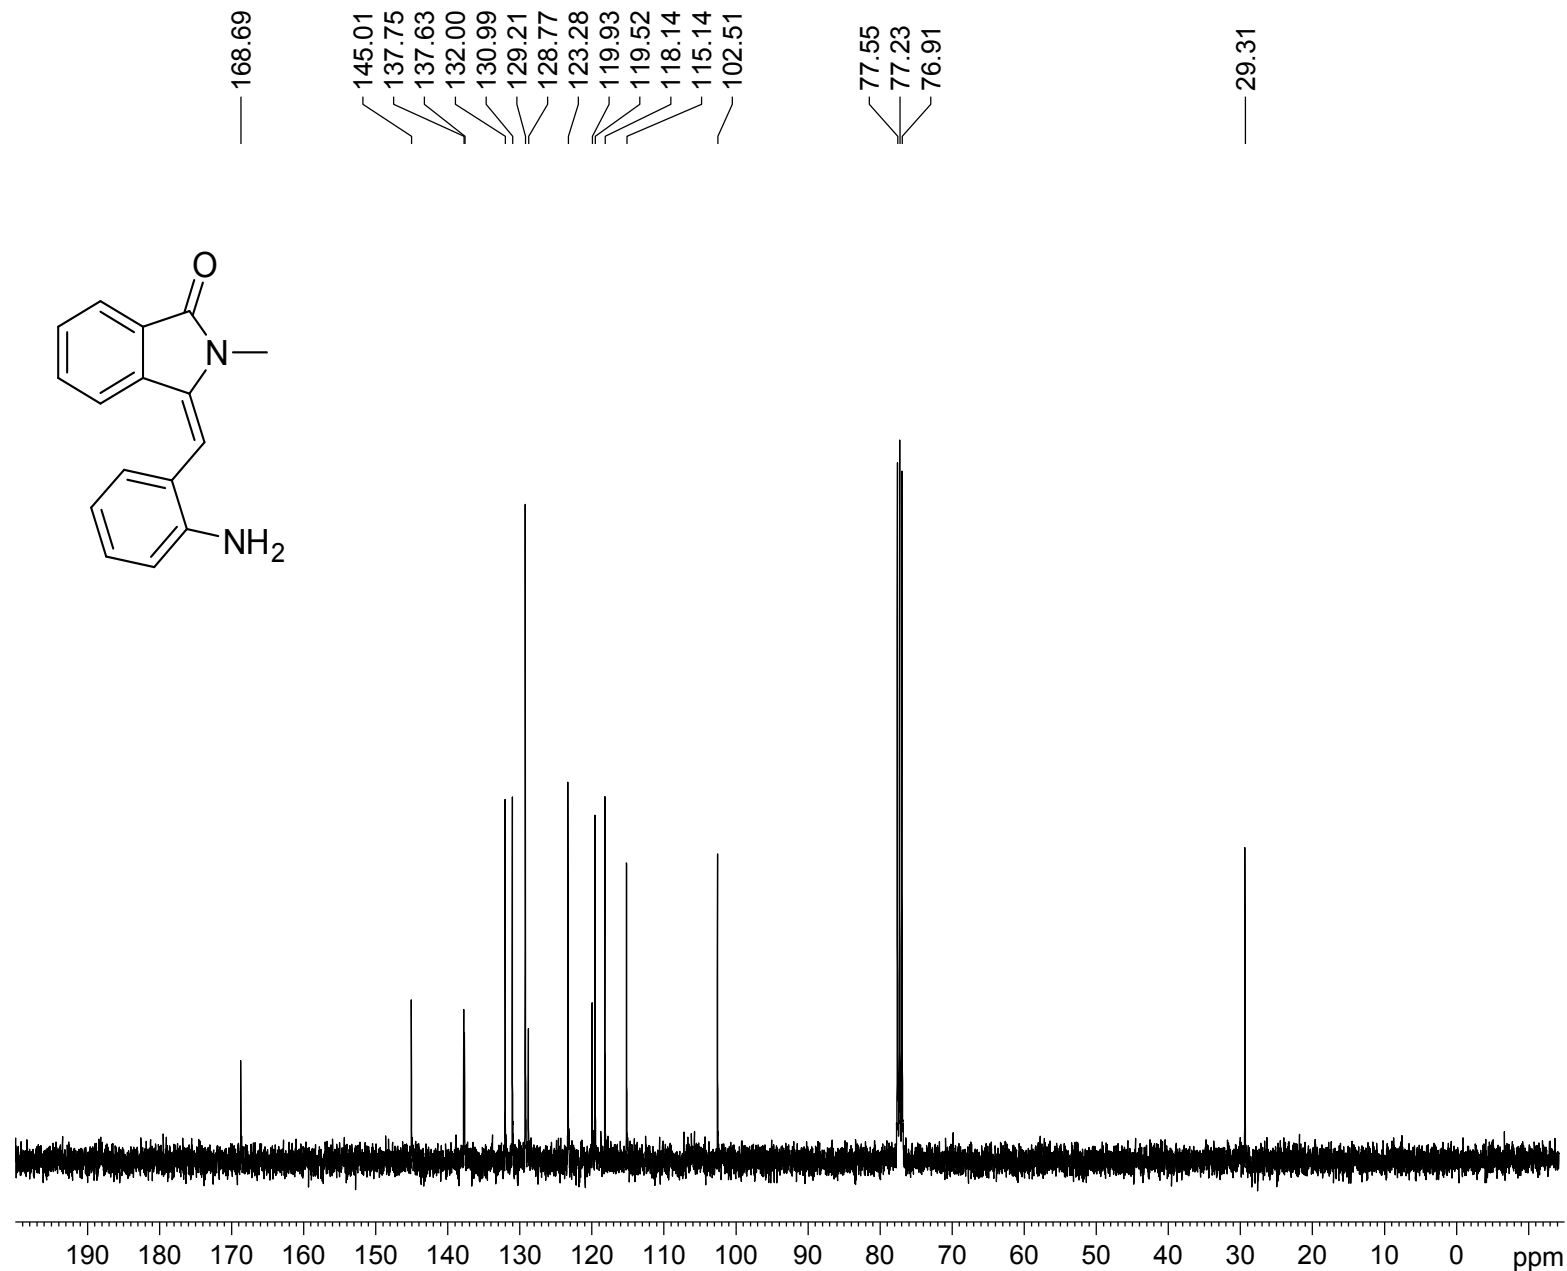

Current Data Parameters

NAME isoindolones  
EXPNO 26  
PROCNO 1

F2 - Acquisition Parameters

Date\_ 20160201  
Time 15.24  
INSTRUM spect  
PROBHD 5 mm BBO BB-1H  
PULPROG zgpg30  
TD 32768  
SOLVENT CDCl3  
NS 85  
DS 0  
SWH 24038.461 Hz  
FIDRES 0.733596 Hz  
AQ 0.6815744 sec  
RG 8192  
DW 20.800 usec  
DE 6.50 usec  
TE 298.0 K  
D1 2.0000000 sec  
D11 0.03000000 sec  
TD0 1

===== CHANNEL f1 =====

NUC1 13C  
P1 9.00 usec  
PL1 7.00 dB  
SFO1 100.6233325 MHz

===== CHANNEL f2 =====

CPDPRG[2] waltz16  
NUC2 1H  
PCPD2 90.00 usec  
PL2 1.80 dB  
PL12 17.00 dB  
PL13 20.00 dB  
SFO2 400.1316005 MHz

F2 - Processing parameters

SI 32768  
SF 100.6127543 MHz  
WDW EM  
SSB 0  
LB 1.00 Hz  
GB 0  
PC 1.00



3-(2-amino-4-bromobenzylidene)-2-methylisoindolin-1-one (4b)

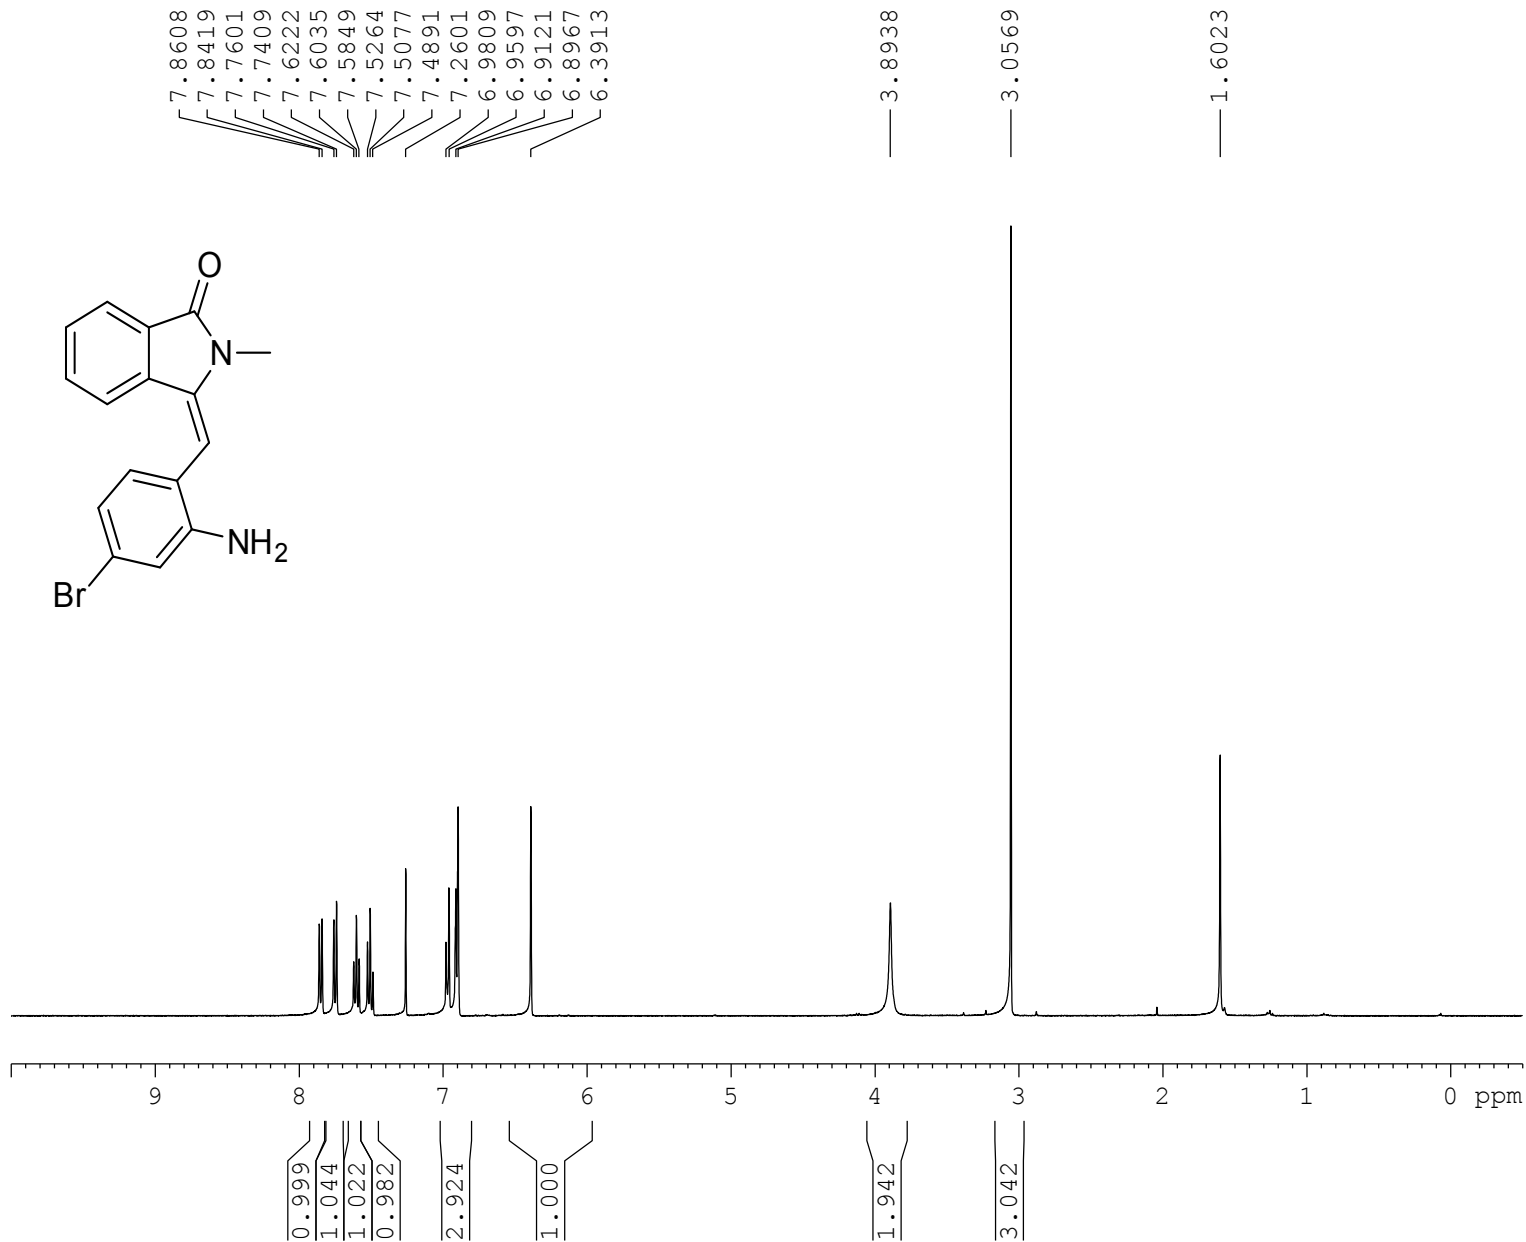

Current Data Parameters  
 NAME project 1  
 EXPNO 52  
 PROCNO 1

F2 - Acquisition Parameters  
 Date\_ 20150723  
 Time 20.16  
 INSTRUM spect  
 PROBHD 5 mm PABBO BB/  
 PULPROG zg30  
 TD 32768  
 SOLVENT CDCl3  
 NS 32  
 DS 0  
 SWH 7211.539 Hz  
 FIDRES 0.220079 Hz  
 AQ 2.2719147 sec  
 RG 198.09  
 DW 69.333 usec  
 DE 10.52 usec  
 TE 299.7 K  
 D1 2.00000000 sec  
 TD0 1

===== CHANNEL f1 =====  
 SFO1 400.1324008 MHz  
 NUC1 1H  
 P1 12.80 usec  
 PLW1 15.00000000 W

F2 - Processing parameters  
 SI 16384  
 SF 400.1300091 MHz  
 WDW EM  
 SSB 0  
 LB 0 Hz  
 GB 0  
 PC 1.00

3-(2-amino-4-bromobenzylidene)-2-methylisoindolin-1-one (4b)

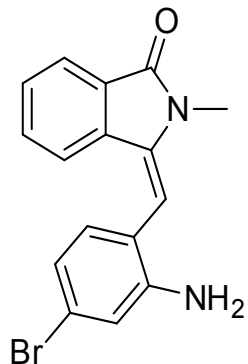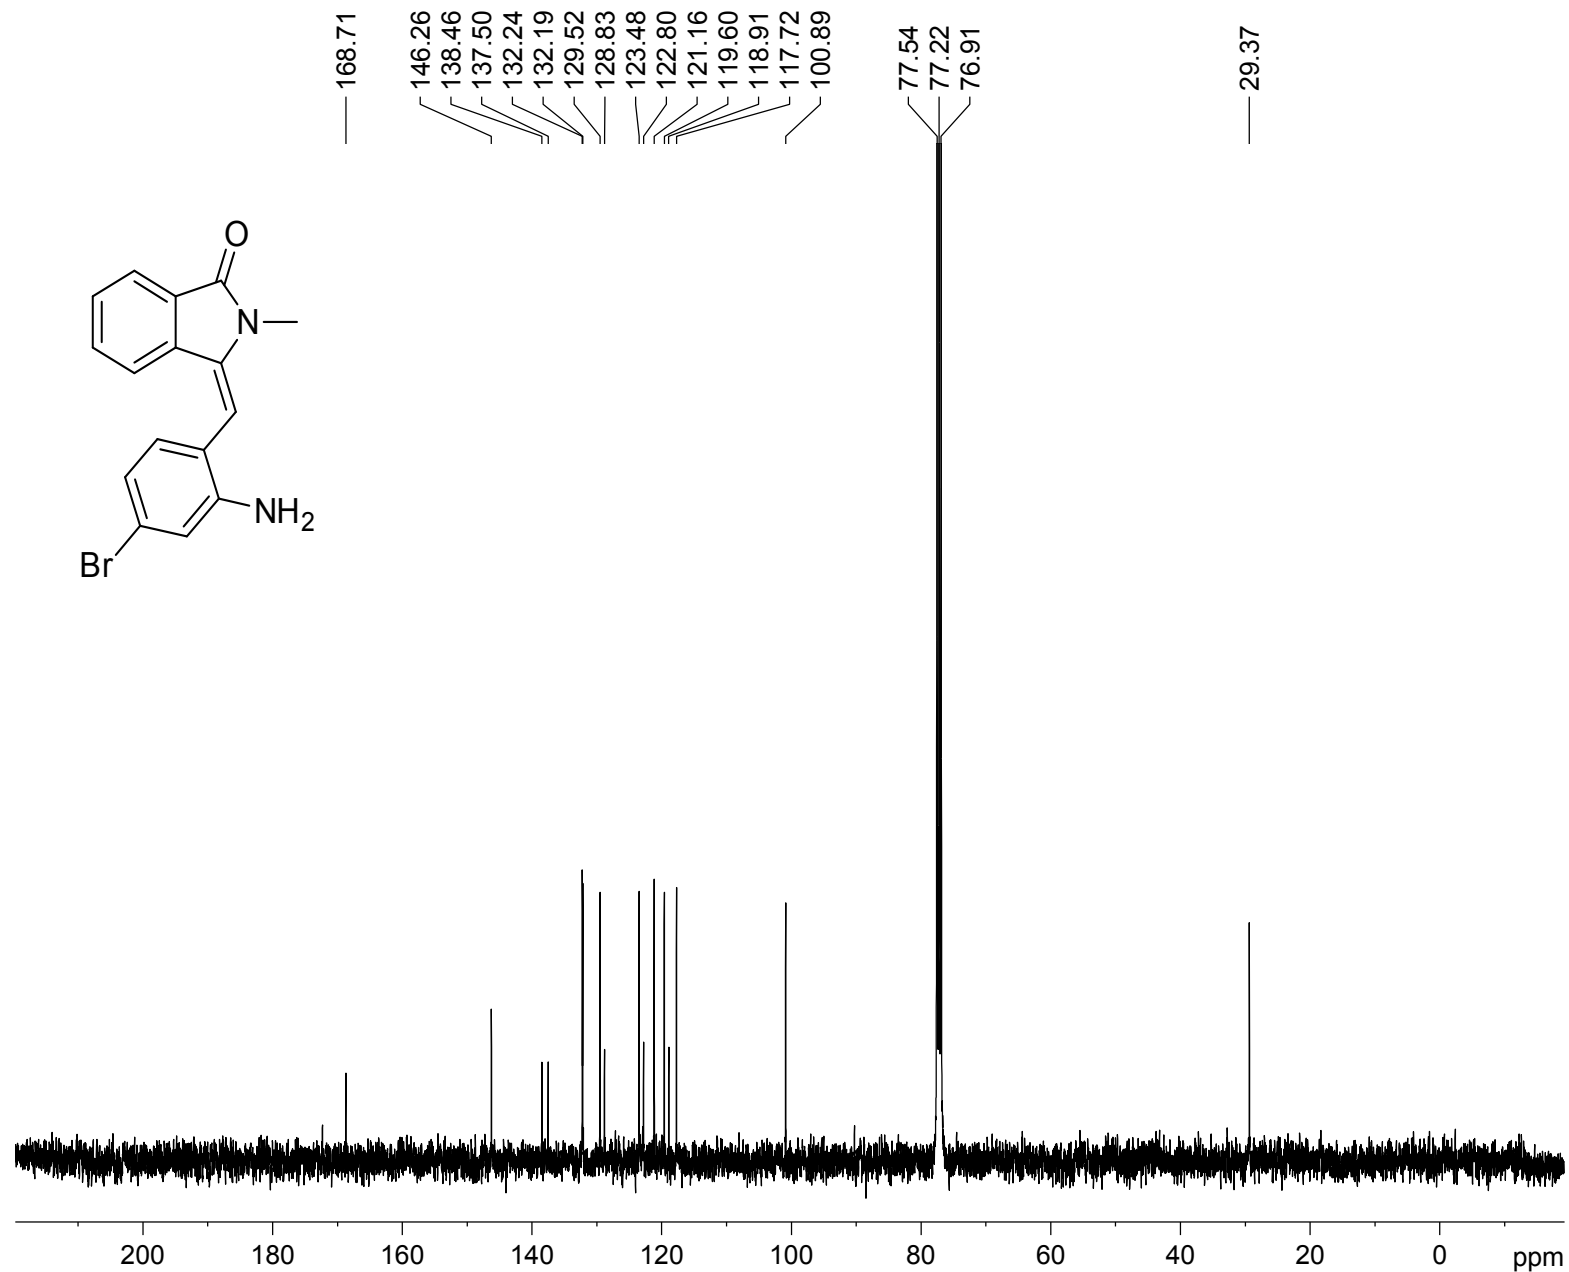

Current Data Parameters

NAME project 1  
EXPNO 160  
PROCNO 1

F2 - Acquisition Parameters

Date\_ 20160202  
Time 19.02  
INSTRUM spect  
PROBHD 5 mm PABBO BB/  
PULPROG zgpg30  
TD 32768  
SOLVENT CDCI3  
NS 728  
DS 0  
SWH 24038.461 Hz  
FIDRES 0.733596 Hz  
AQ 0.6815744 sec  
RG 198.09  
DW 20.800 usec  
DE 6.50 usec  
TE 297.5 K  
D1 2.00000000 sec  
D11 0.03000000 sec  
TD0 1

==== CHANNEL f1 =====

SFO1 100.6228298 MHz  
NUC1 13C  
P1 10.00 usec  
PLW1 47.50000000 W

==== CHANNEL f2 =====

SFO2 400.1316005 MHz  
NUC2 1H  
CPDPRG[2] waltz16  
PCPD2 90.00 usec  
PLW2 15.00000000 W  
PLW12 0.33750001 W  
PLW13 0.27338001 W

F2 - Processing parameters

SI 32768  
SF 100.6127479 MHz  
WDW EM  
SSB 0  
LB 2.00 Hz  
GB 0  
PC 1.00

3-(2-amino-5-chlorobenzylidene)-2-methylisoindolin-1-one (4c)

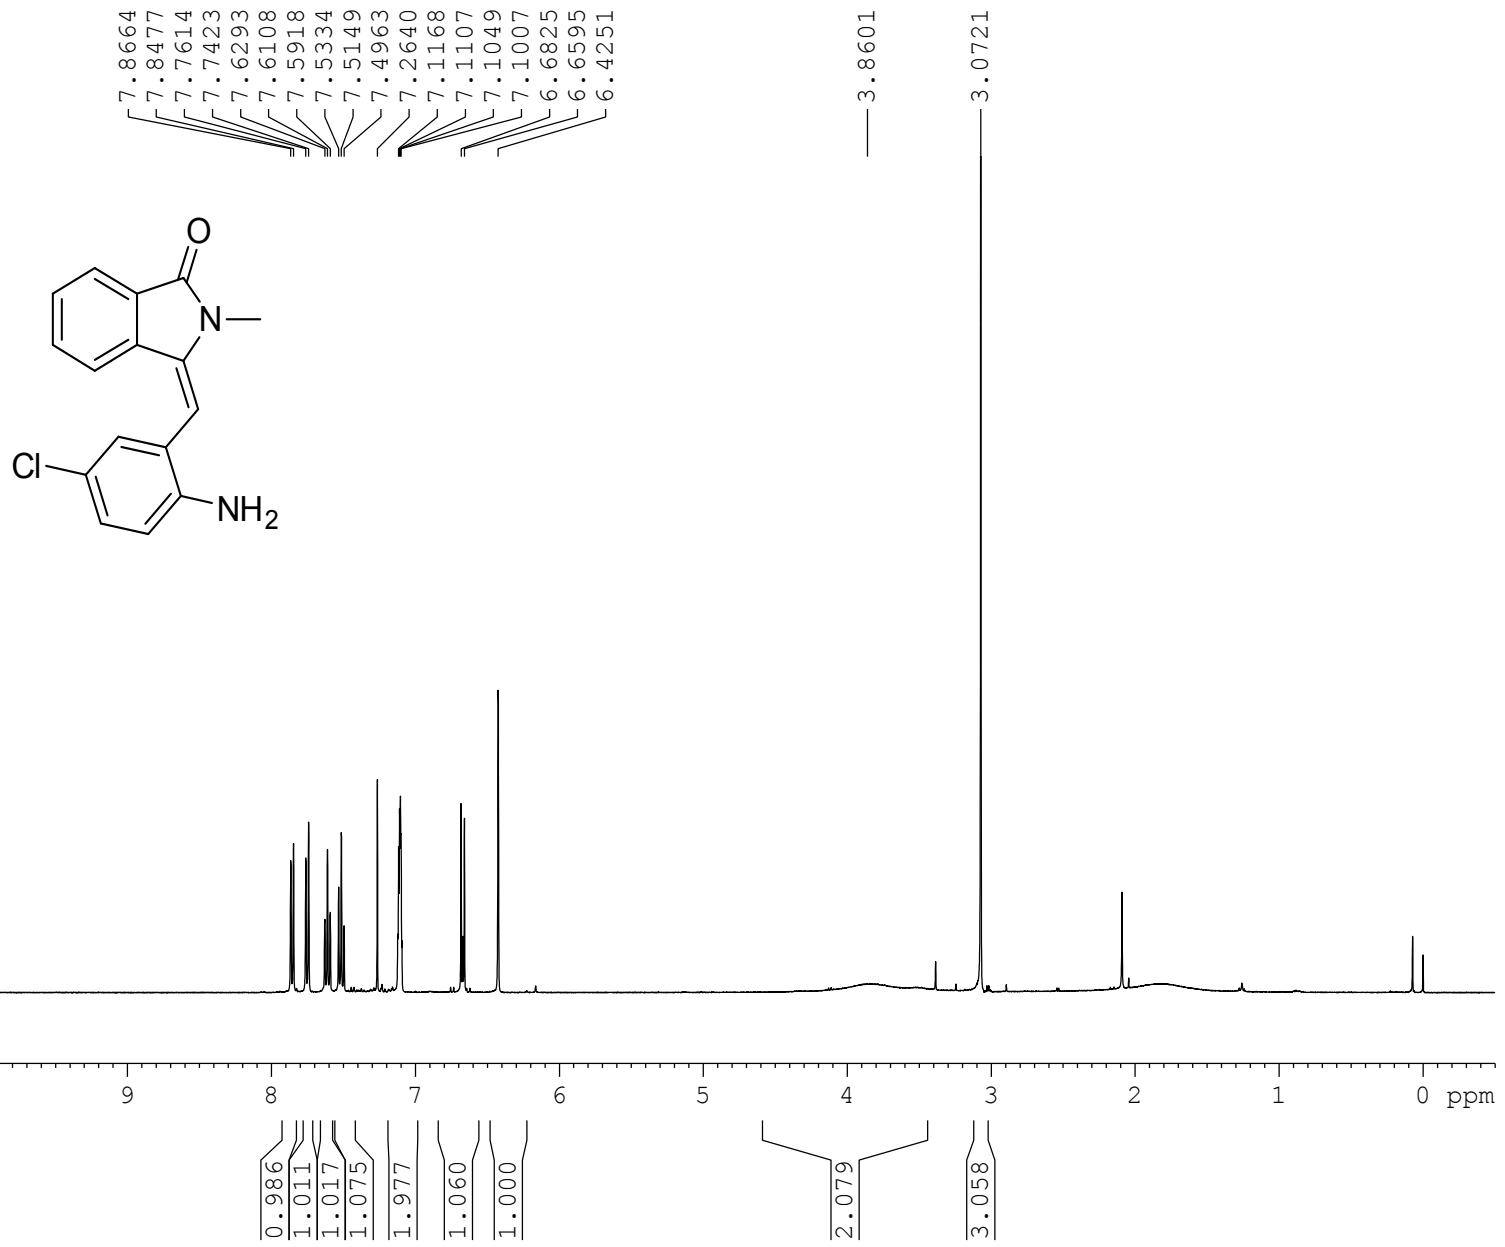

Current Data Parameters  
 NAME isoindolones  
 EXPNO 13  
 PROCNO 1

F2 - Acquisition Parameters  
 Date\_ 20151220  
 Time 22.35  
 INSTRUM spect  
 PROBHD 5 mm BBO BB-1H  
 PULPROG zg30  
 TD 32768  
 SOLVENT CDCl3  
 NS 32  
 DS 0  
 SWH 7246.377 Hz  
 FIDRES 0.221142 Hz  
 AQ 2.2609921 sec  
 RG 228.1  
 DW 69.000 usec  
 DE 6.50 usec  
 TE 297.6 K  
 D1 2.00000000 sec  
 TD0 1

===== CHANNEL f1 =====  
 NUC1 1H  
 P1 14.40 usec  
 PL1 1.80 dB  
 SFO1 400.1324008 MHz

F2 - Processing parameters  
 SI 16384  
 SF 400.1300078 MHz  
 WDW EM  
 SSB 0  
 LB 0 Hz  
 GB 0  
 PC 1.00

3-(2-amino-5-chlorobenzylidene)-2-methylisoindolin-1-one (4c)

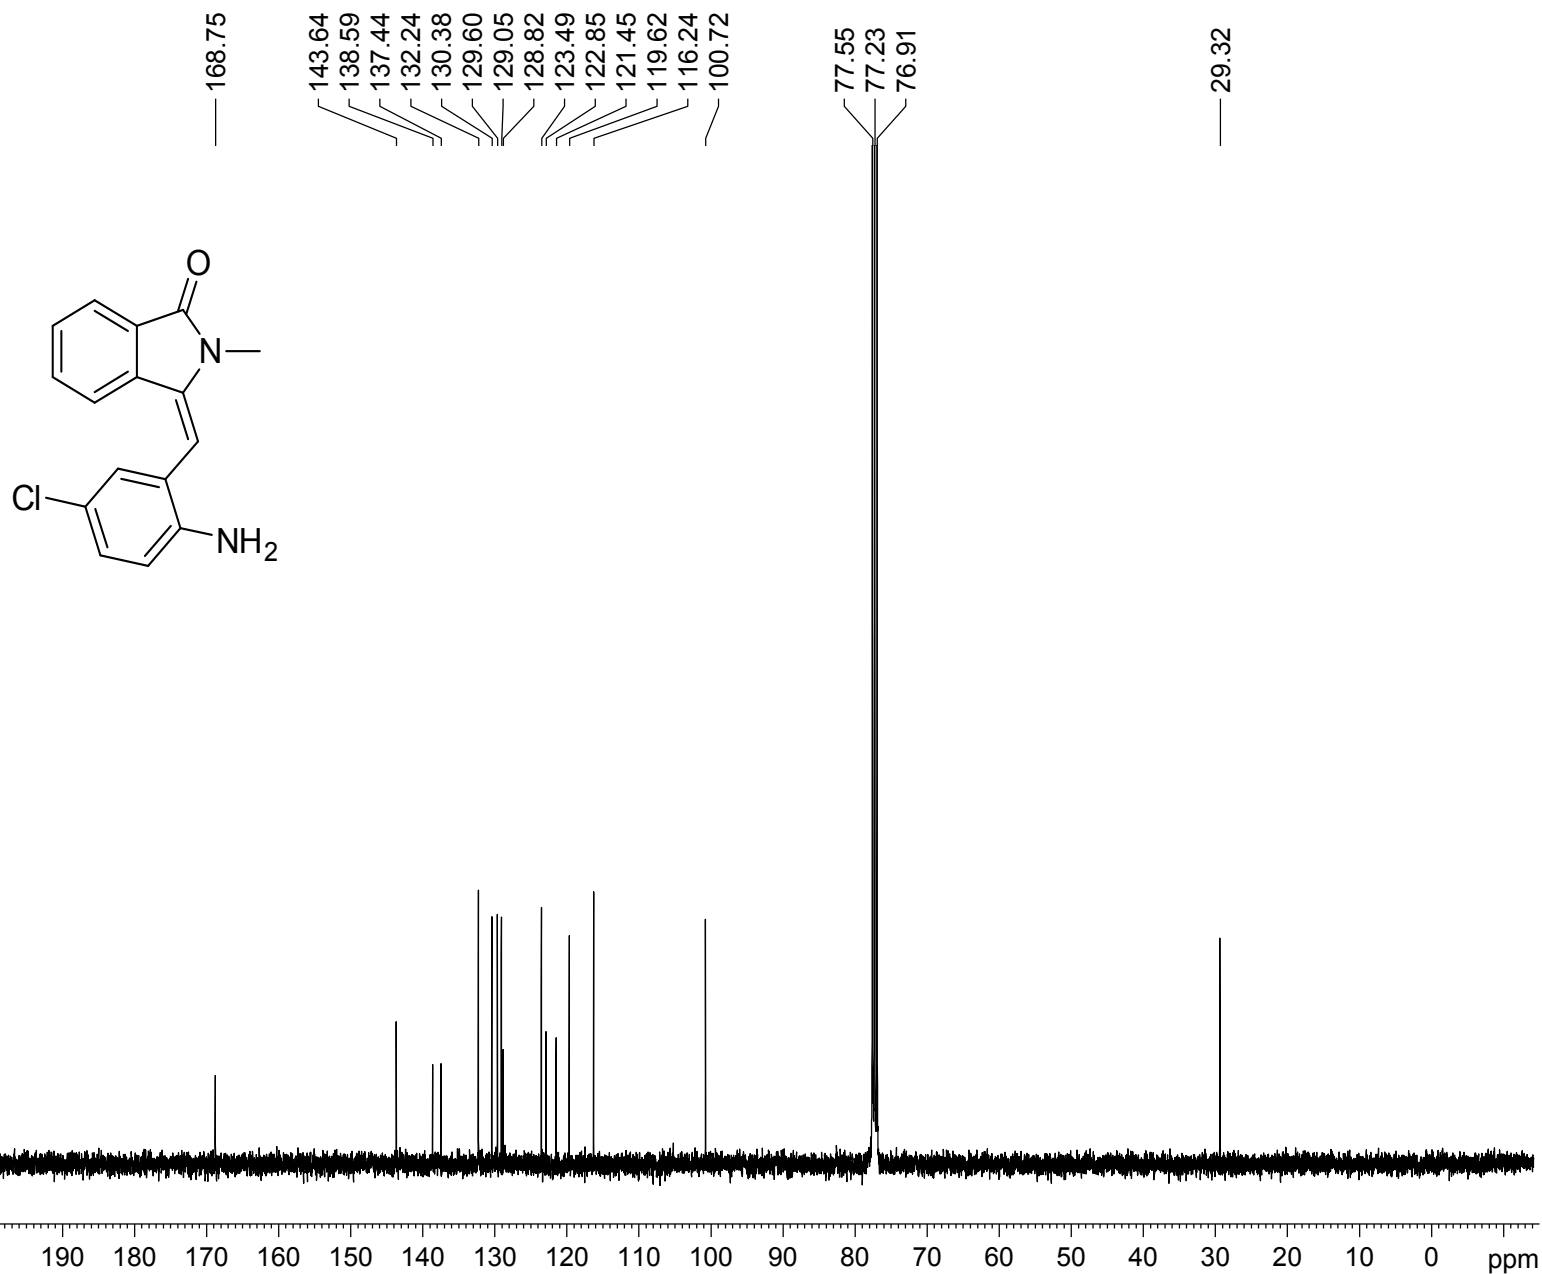

Current Data Parameters

NAME isoindolones  
EXPNO 14  
PROCNO 1

F2 - Acquisition Parameters

Date\_ 20151220  
Time 22.38  
INSTRUM spect  
PROBHD 5 mm BBO BB-1H  
PULPROG zgpg30  
TD 32768  
SOLVENT CDCl3  
NS 864  
DS 0  
SWH 24038.461 Hz  
FIDRES 0.733596 Hz  
AQ 0.6815744 sec  
RG 8192  
DW 20.800 usec  
DE 6.50 usec  
TE 297.5 K  
D1 2.0000000 sec  
D11 0.0300000 sec  
TD0 1

===== CHANNEL f1 =====

NUC1 13C  
P1 9.00 usec  
PL1 7.00 dB  
SFO1 100.6233325 MHz

===== CHANNEL f2 =====

CPDPRG[2] waltz16  
NUC2 1H  
PCPD2 90.00 usec  
PL2 1.80 dB  
PL12 17.00 dB  
PL13 20.00 dB  
SFO2 400.1316005 MHz

F2 - Processing parameters

SI 32768  
SF 100.6127484 MHz  
WDW EM  
SSB 0  
LB 1.00 Hz  
GB 0  
PC 1.00

3-(2-amino-5-chlorobenzylidene)-2-ethylisoindolin-1-one (4d)

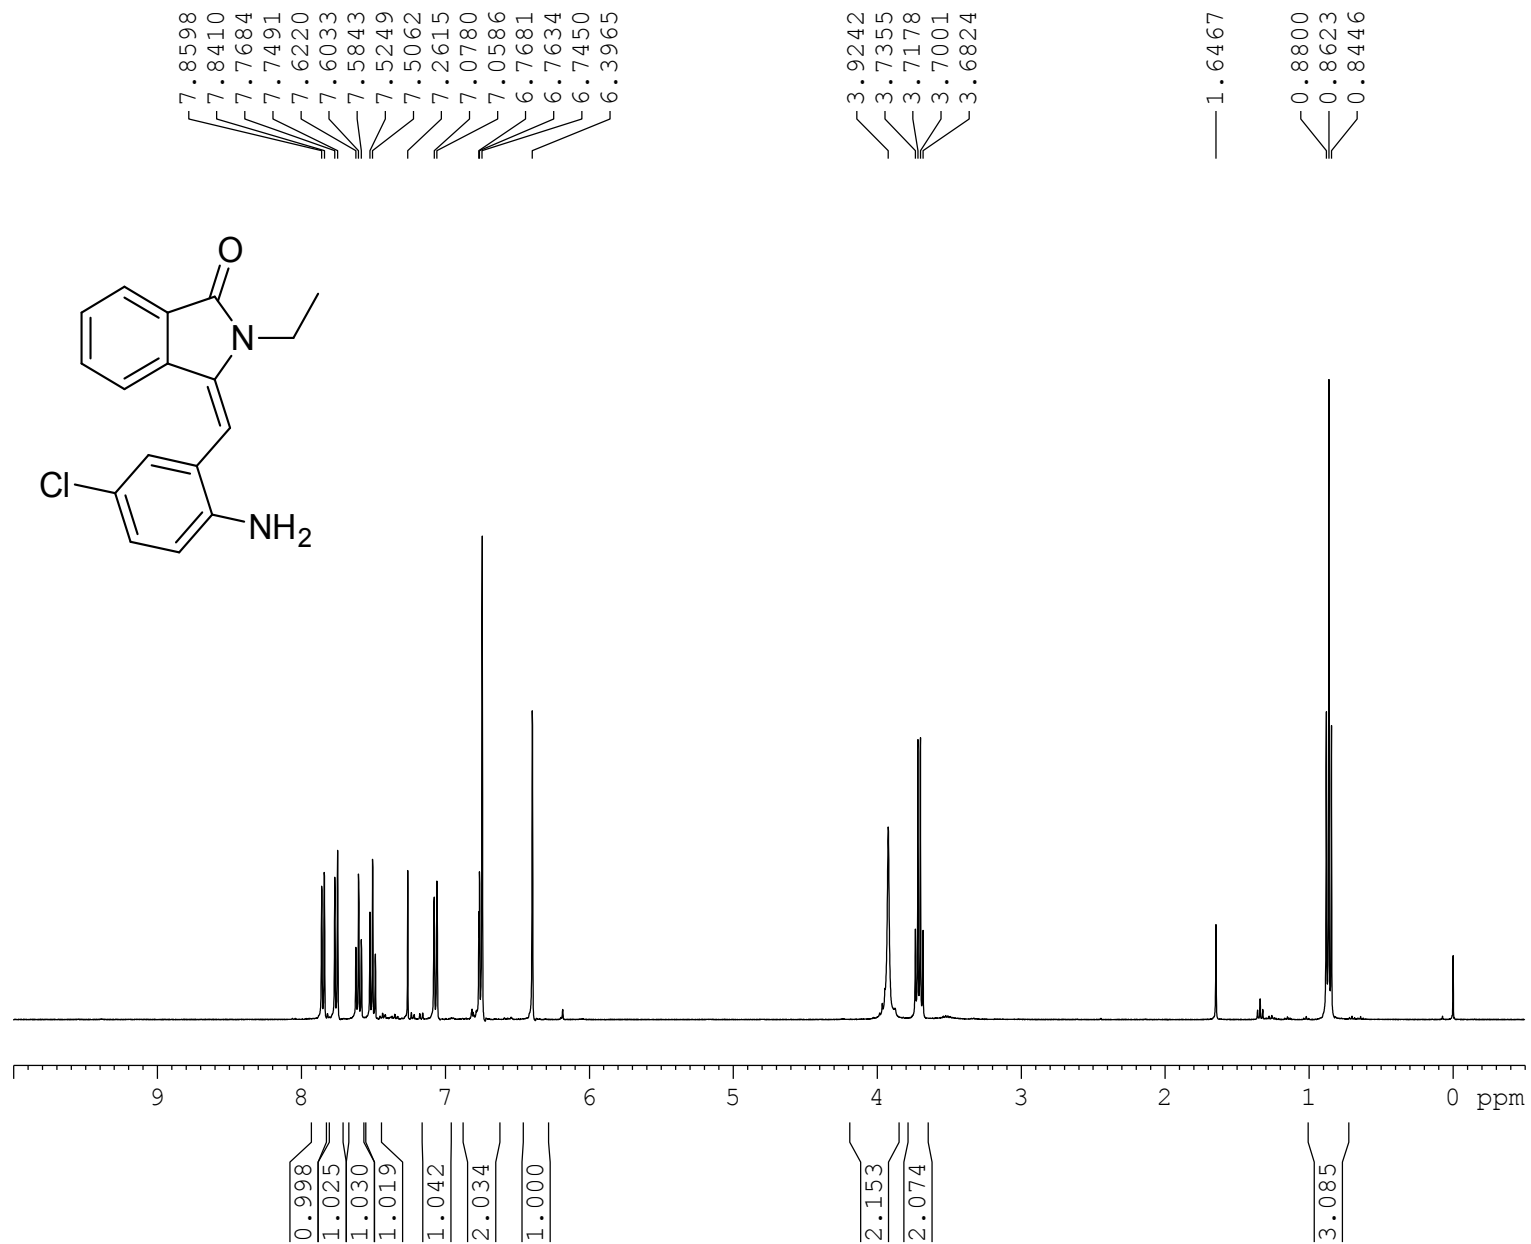

Current Data Parameters  
 NAME isoindolones  
 EXPNO 7  
 PROCNO 1

F2 - Acquisition Parameters  
 Date\_ 20151220  
 Time 18.15  
 INSTRUM spect  
 PROBHD 5 mm BBO BB-1H  
 PULPROG zg30  
 TD 32768  
 SOLVENT CDCl3  
 NS 32  
 DS 0  
 SWH 7246.377 Hz  
 FIDRES 0.221142 Hz  
 AQ 2.2609921 sec  
 RG 181  
 DW 69.000 usec  
 DE 6.50 usec  
 TE 297.6 K  
 D1 2.00000000 sec  
 TD0 1

===== CHANNEL f1 =====  
 NUC1 1H  
 P1 14.40 usec  
 PL1 1.80 dB  
 SFO1 400.1324008 MHz

F2 - Processing parameters  
 SI 16384  
 SF 400.1300087 MHz  
 WDW EM  
 SSB 0  
 LB 0 Hz  
 GB 0  
 PC 1.00

3-(2-amino-5-chlorobenzylidene)-2-ethylisoindolin-1-one (4d)

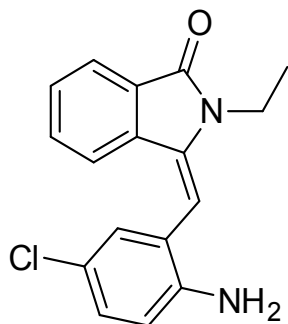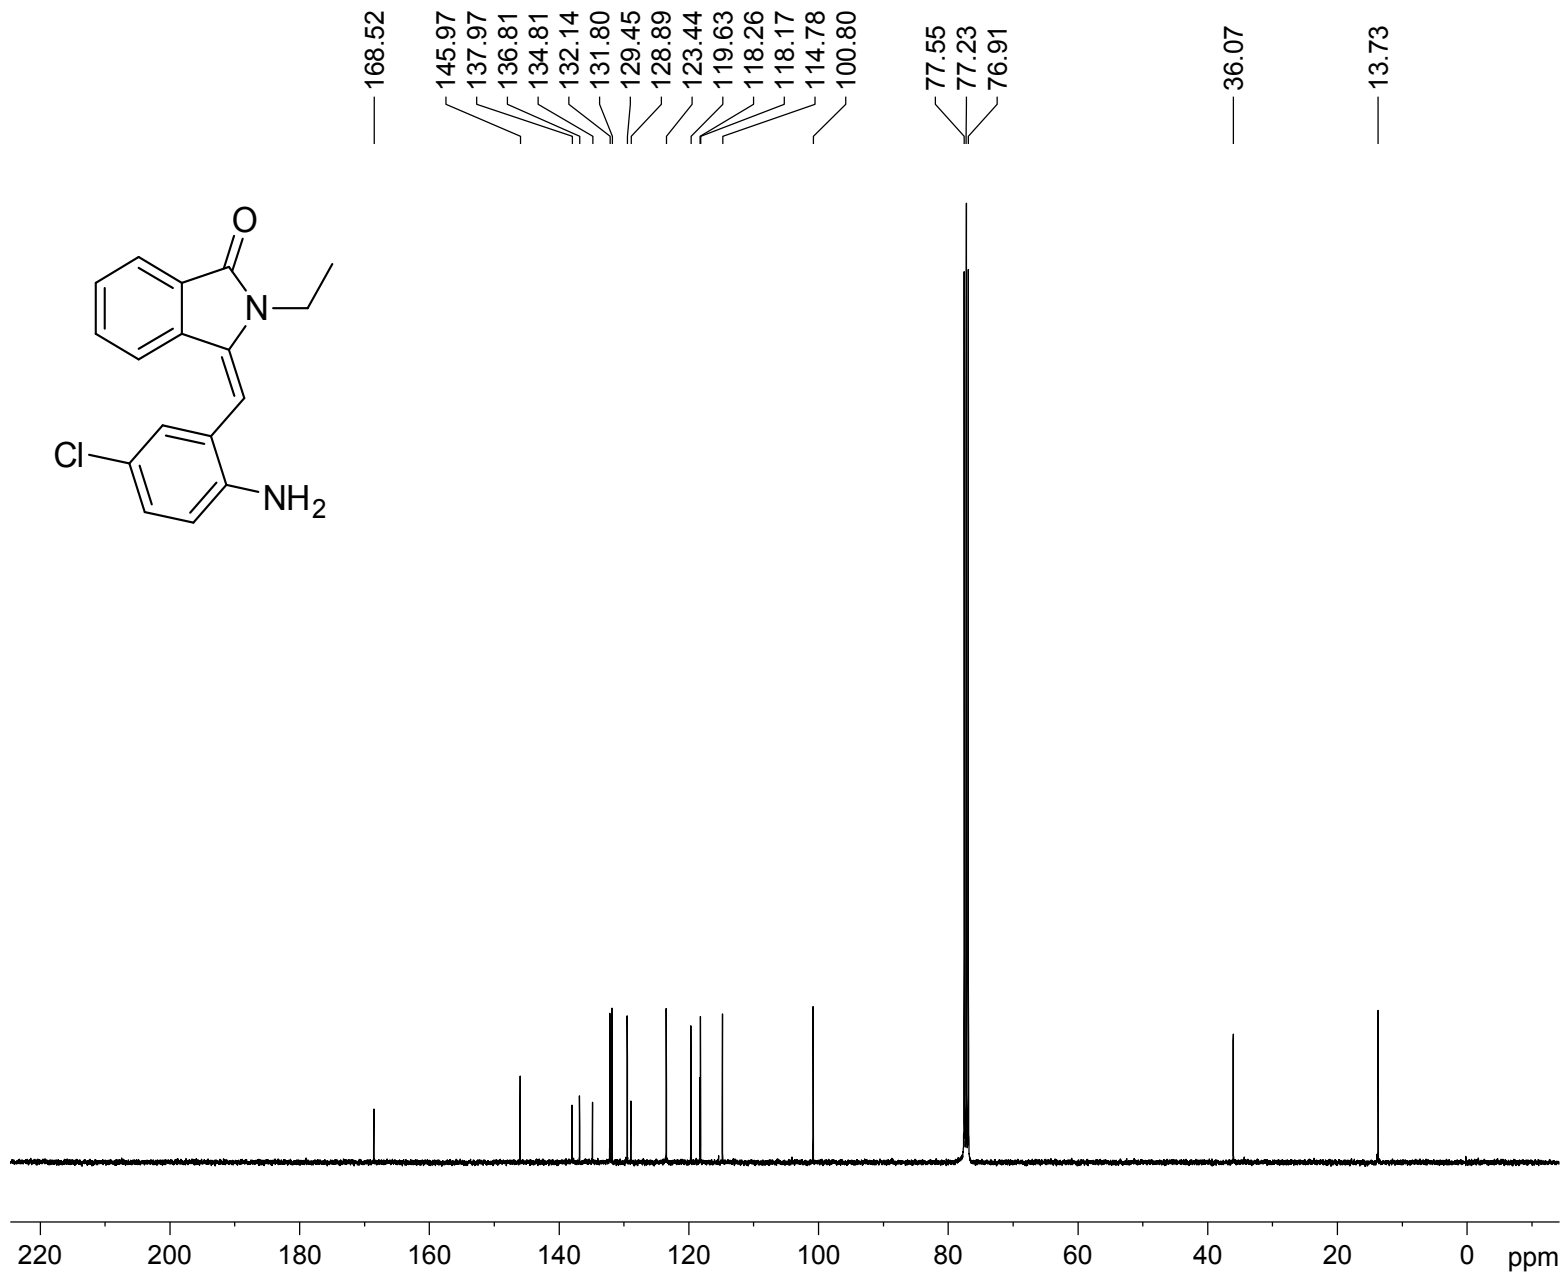

Current Data Parameters

NAME isoindolones  
EXPNO 8  
PROCNO 1

F2 - Acquisition Parameters

Date\_ 20151220  
Time 18.18  
INSTRUM spect  
PROBHD 5 mm BBO BB-1H  
PULPROG zgpg30  
TD 32768  
SOLVENT CDCl3  
NS 2814  
DS 0  
SWH 24038.461 Hz  
FIDRES 0.733596 Hz  
AQ 0.6815744 sec  
RG 8192  
DW 20.800 usec  
DE 6.50 usec  
TE 297.5 K  
D1 2.00000000 sec  
D11 0.03000000 sec  
TD0 1

===== CHANNEL f1 =====

NUC1 13C  
P1 9.00 usec  
PL1 7.00 dB  
SFO1 100.6233325 MHz

===== CHANNEL f2 =====

CPDPRG[2] waltz16  
NUC2 1H  
PCPD2 90.00 usec  
PL2 1.80 dB  
PL12 17.00 dB  
PL13 20.00 dB  
SFO2 400.1316005 MHz

F2 - Processing parameters

SI 32768  
SF 100.6127484 MHz  
WDW EM  
SSB 0  
LB 1.00 Hz  
GB 0  
PC 1.00

2-allyl-3-(2-amino-5-chlorobenzylidene)isoindolin-1-one (4e)

7.6436  
7.6414  
7.6249  
7.6227  
7.6061  
7.6033  
7.5445  
7.5429  
7.5258  
7.5071  
7.2609  
7.1236  
7.1175  
7.0961  
6.6631  
6.6420  
6.3953  
5.4930  
5.4800  
5.4672  
5.4633  
5.4543  
5.4502  
5.4371  
5.4243  
5.4116  
4.9485  
4.9452  
4.9225  
4.9192  
4.6390  
4.6351  
4.6317  
4.5961  
4.5922  
4.5888  
4.3147  
4.3108  
4.3071  
4.3019  
4.2982  
4.2942  
3.7775

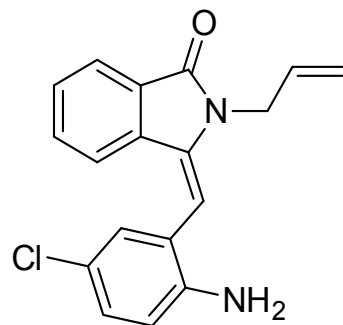

Current Data Parameters  
NAME spiro1  
EXPNO 22  
PROCNO 1

F2 - Acquisition Parameters  
Date\_ 20150912  
Time 16.02  
INSTRUM spect  
PROBHD 5 mm PABBO BB/  
PULPROG zg30  
TD 32768  
SOLVENT CDCl3  
NS 32  
DS 0  
SWH 7211.539 Hz  
FIDRES 0.220079 Hz  
AQ 2.2719147 sec  
RG 99.72  
DW 69.333 usec  
DE 10.50 usec  
TE 297.9 K  
D1 2.00000000 sec  
TD0 1

===== CHANNEL f1 =====  
SFO1 400.1324008 MHz  
NUC1 1H  
P1 12.90 usec  
PLW1 15.00000000 W

F2 - Processing parameters  
SI 16384  
SF 400.1300094 MHz  
WDW EM  
SSB 0  
LB 0 Hz  
GB 0  
PC 1.00

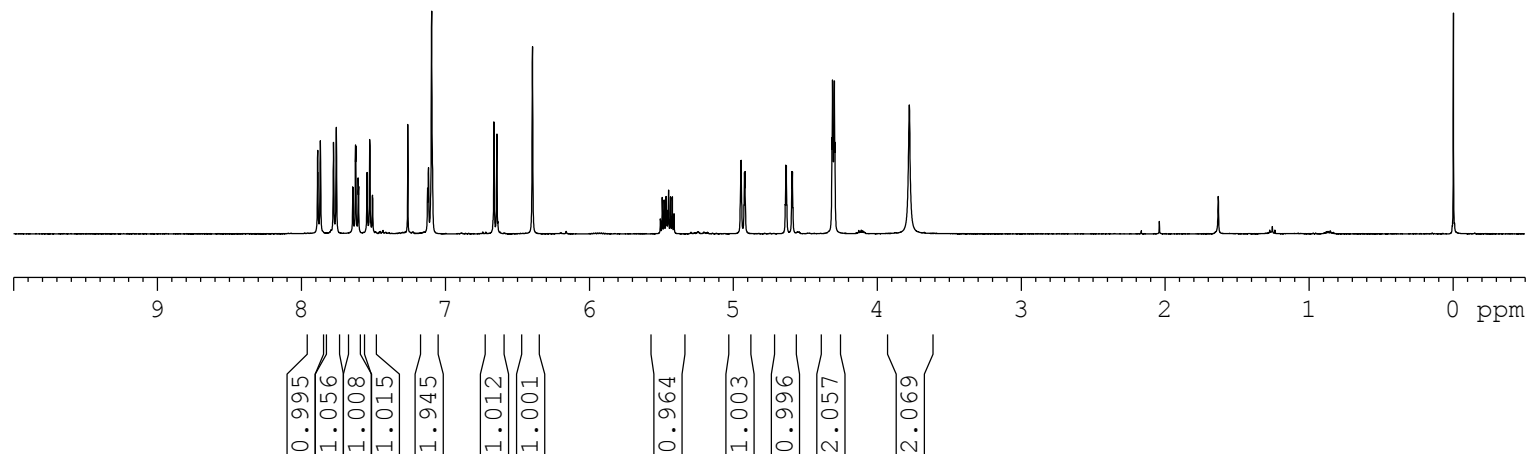

2-allyl-3-(2-amino-5-chlorobenzylidene)isoindolin-1-one (4e)

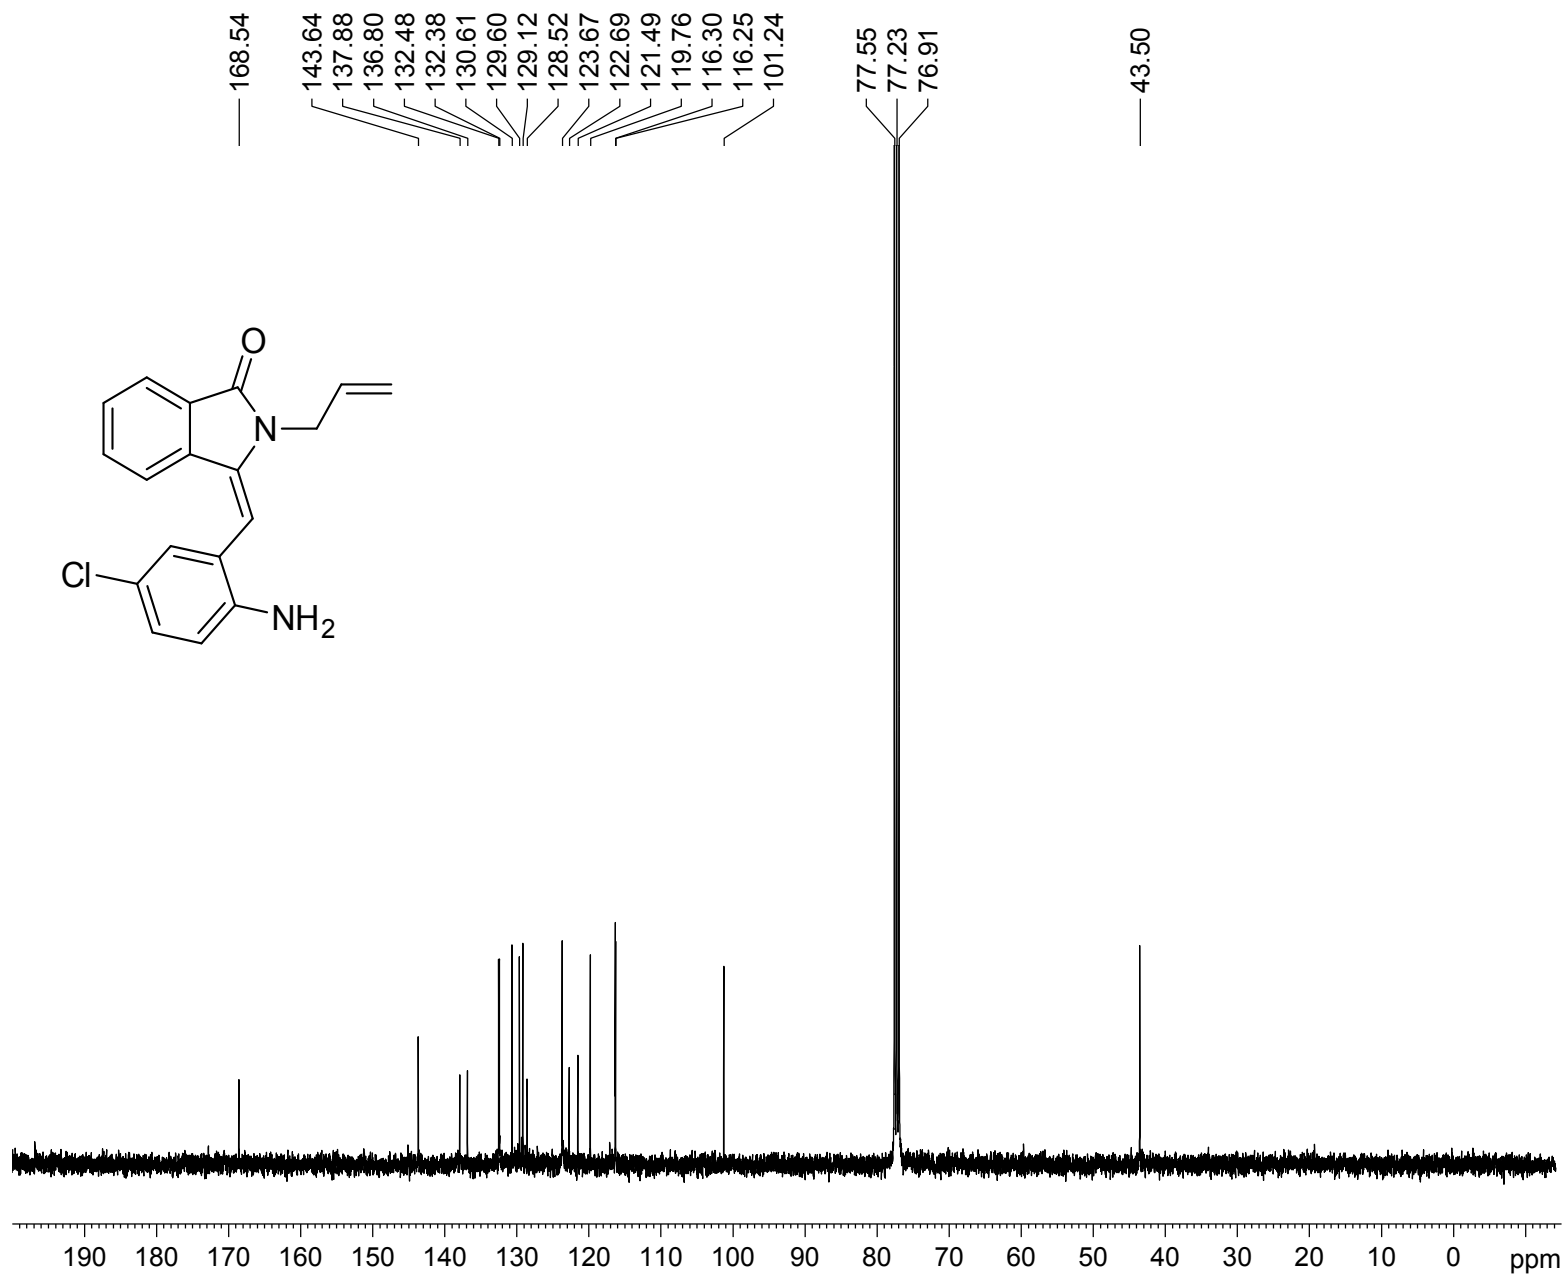

Current Data Parameters

NAME isoindolones  
EXPNO 10  
PROCNO 1

F2 - Acquisition Parameters

Date\_ 20151220  
Time 20.38  
INSTRUM spect  
PROBHD 5 mm BBO BB-1H  
PULPROG zgpg30  
TD 32768  
SOLVENT CDCl3  
NS 720  
DS 0  
SWH 24038.461 Hz  
FIDRES 0.733596 Hz  
AQ 0.6815744 sec  
RG 8192  
DW 20.800 usec  
DE 6.50 usec  
TE 297.4 K  
D1 2.00000000 sec  
D11 0.03000000 sec  
TD0 1

===== CHANNEL f1 =====

NUC1 13C  
P1 9.00 usec  
PL1 7.00 dB  
SFO1 100.6233325 MHz

===== CHANNEL f2 =====

CPDPRG[2] waltz16  
NUC2 1H  
PCPD2 90.00 usec  
PL2 1.80 dB  
PL12 17.00 dB  
PL13 20.00 dB  
SFO2 400.1316005 MHz

F2 - Processing parameters

SI 32768  
SF 100.6127485 MHz  
WDW EM  
SSB 0  
LB 1.00 Hz  
GB 0  
PC 1.00



3-(2-amino-5-chlorobenzylidene)-2-(2-methoxyethyl)isoindolin-1-one (4f)

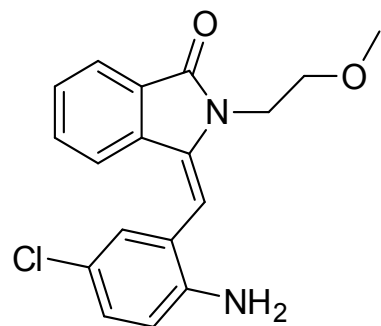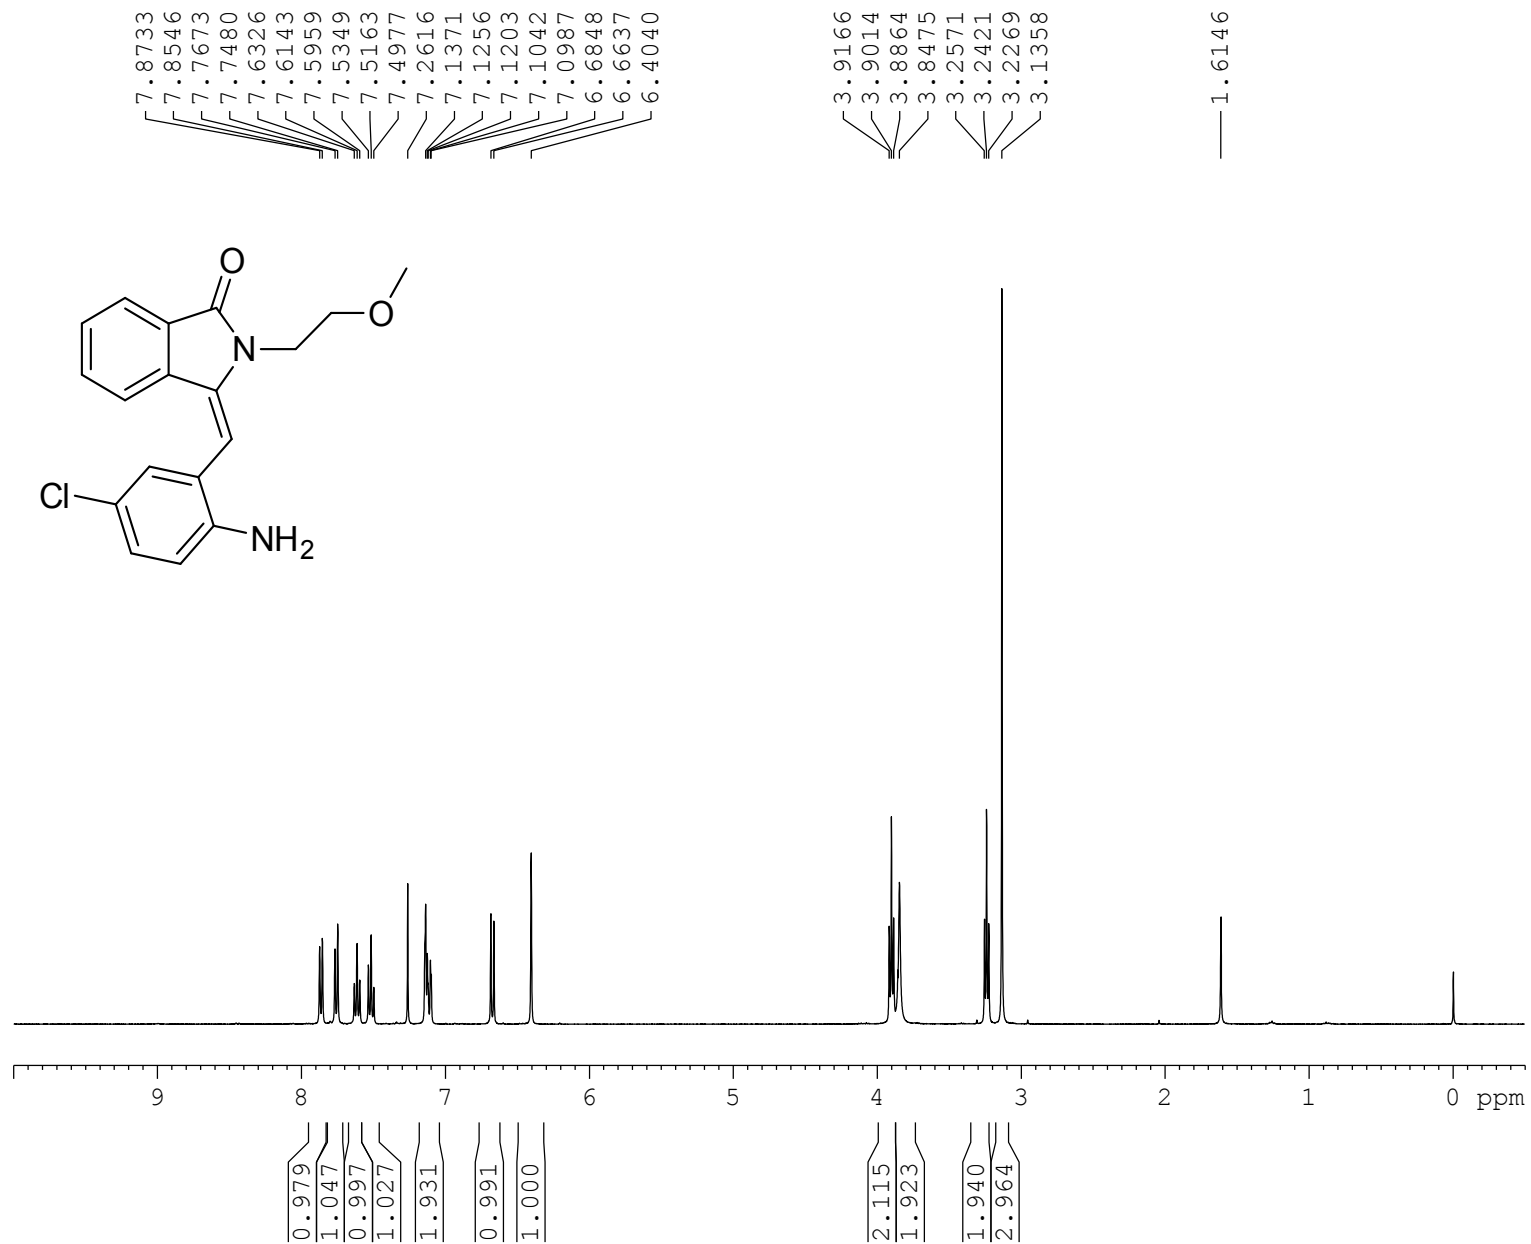

Current Data Parameters  
 NAME project 1  
 EXPNO 158  
 PROCNO 1

F2 - Acquisition Parameters  
 Date\_ 20160128  
 Time 18.51  
 INSTRUM spect  
 PROBHD 5 mm PABBO BB/  
 PULPROG zg30  
 TD 32768  
 SOLVENT CDCl3  
 NS 32  
 DS 0  
 SWH 7211.539 Hz  
 FIDRES 0.220079 Hz  
 AQ 2.2719147 sec  
 RG 128.9  
 DW 69.333 usec  
 DE 10.50 usec  
 TE 297.0 K  
 D1 2.00000000 sec  
 TD0 1

===== CHANNEL f1 =====  
 SFO1 400.1324008 MHz  
 NUC1 1H  
 P1 12.90 usec  
 PLW1 15.00000000 W

F2 - Processing parameters  
 SI 16384  
 SF 400.1300094 MHz  
 WDW EM  
 SSB 0  
 LB 0 Hz  
 GB 0  
 PC 1.00

3-(2-amino-5-chlorobenzylidene)-2-(2-methoxyethyl)isoindolin-1-one (4f)

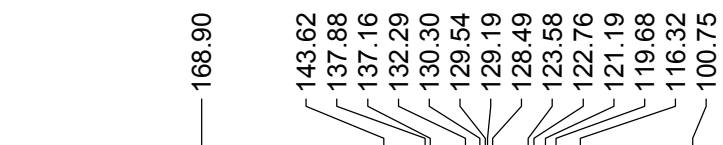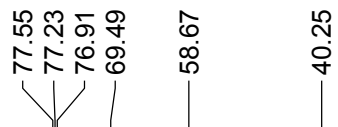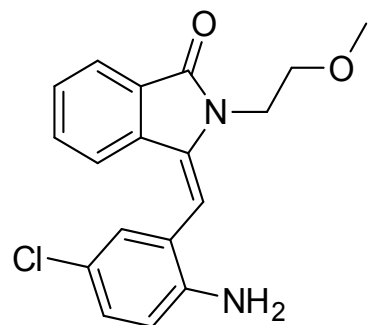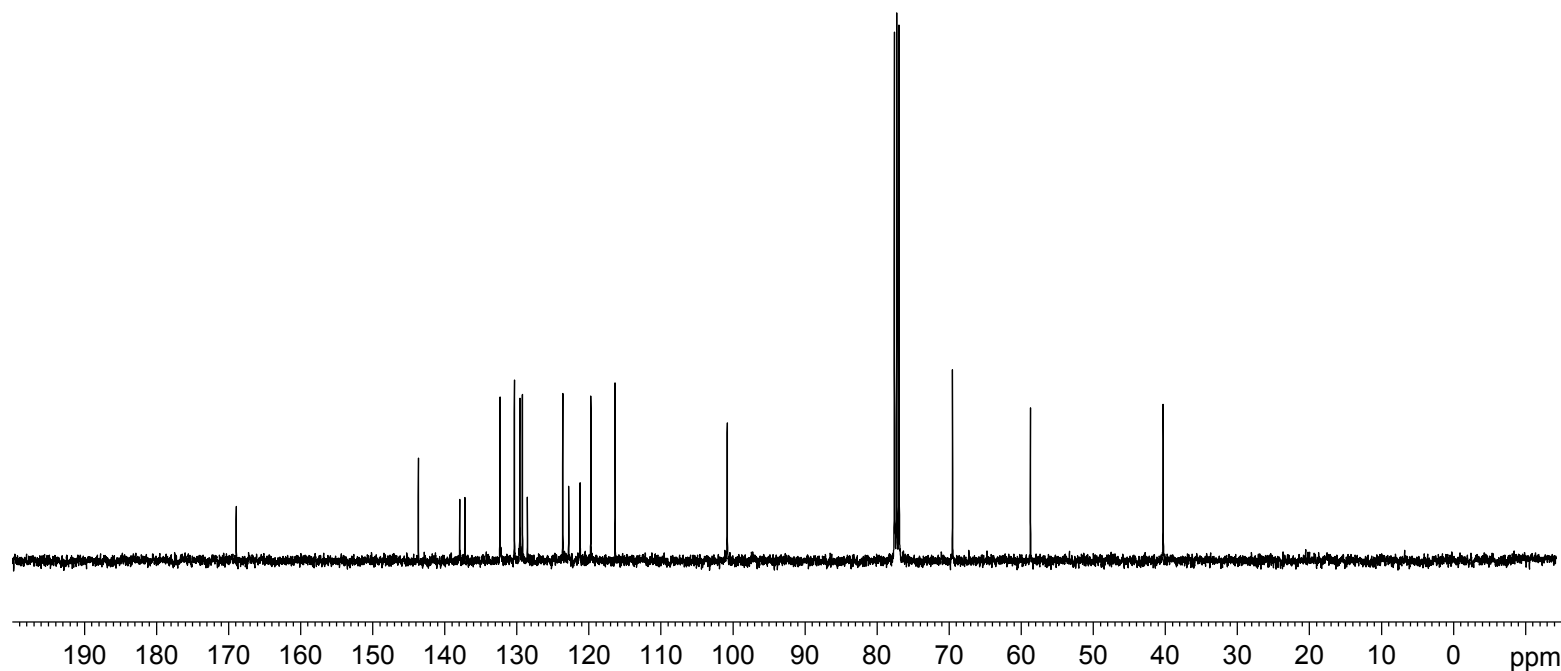

Current Data Parameters  
 NAME spiro1  
 EXPNO 27  
 PROCNO 1

F2 - Acquisition Parameters  
 Date\_ 20150914  
 Time 15.52  
 INSTRUM spect  
 PROBHD 5 mm PABBO BB/  
 PULPROG zgpg30  
 TD 32768  
 SOLVENT CDCl3  
 NS 106  
 DS 0  
 SWH 24038.461 Hz  
 FIDRES 0.733596 Hz  
 AQ 0.6815744 sec  
 RG 198.09  
 DW 20.800 usec  
 DE 6.50 usec  
 TE 298.7 K  
 D1 2.00000000 sec  
 D11 0.03000000 sec  
 TD0 1

===== CHANNEL f1 =====  
 SFO1 100.6233319 MHz  
 NUC1 13C  
 P1 10.00 usec  
 PLW1 47.50000000 W

===== CHANNEL f2 =====  
 SFO2 400.1316005 MHz  
 NUC2 1H  
 CPDPRG[2] waltz16  
 PCPD2 90.00 usec  
 PLW2 15.00000000 W  
 PLW12 0.33750001 W  
 PLW13 0.27338001 W

F2 - Processing parameters  
 SI 32768  
 SF 100.6127516 MHz  
 WDW EM  
 SSB 0  
 LB 2.00 Hz  
 GB 0  
 PC 1.00

3-(2-aminobenzylidene)-2-phenylisoindolin-1-one (4g)

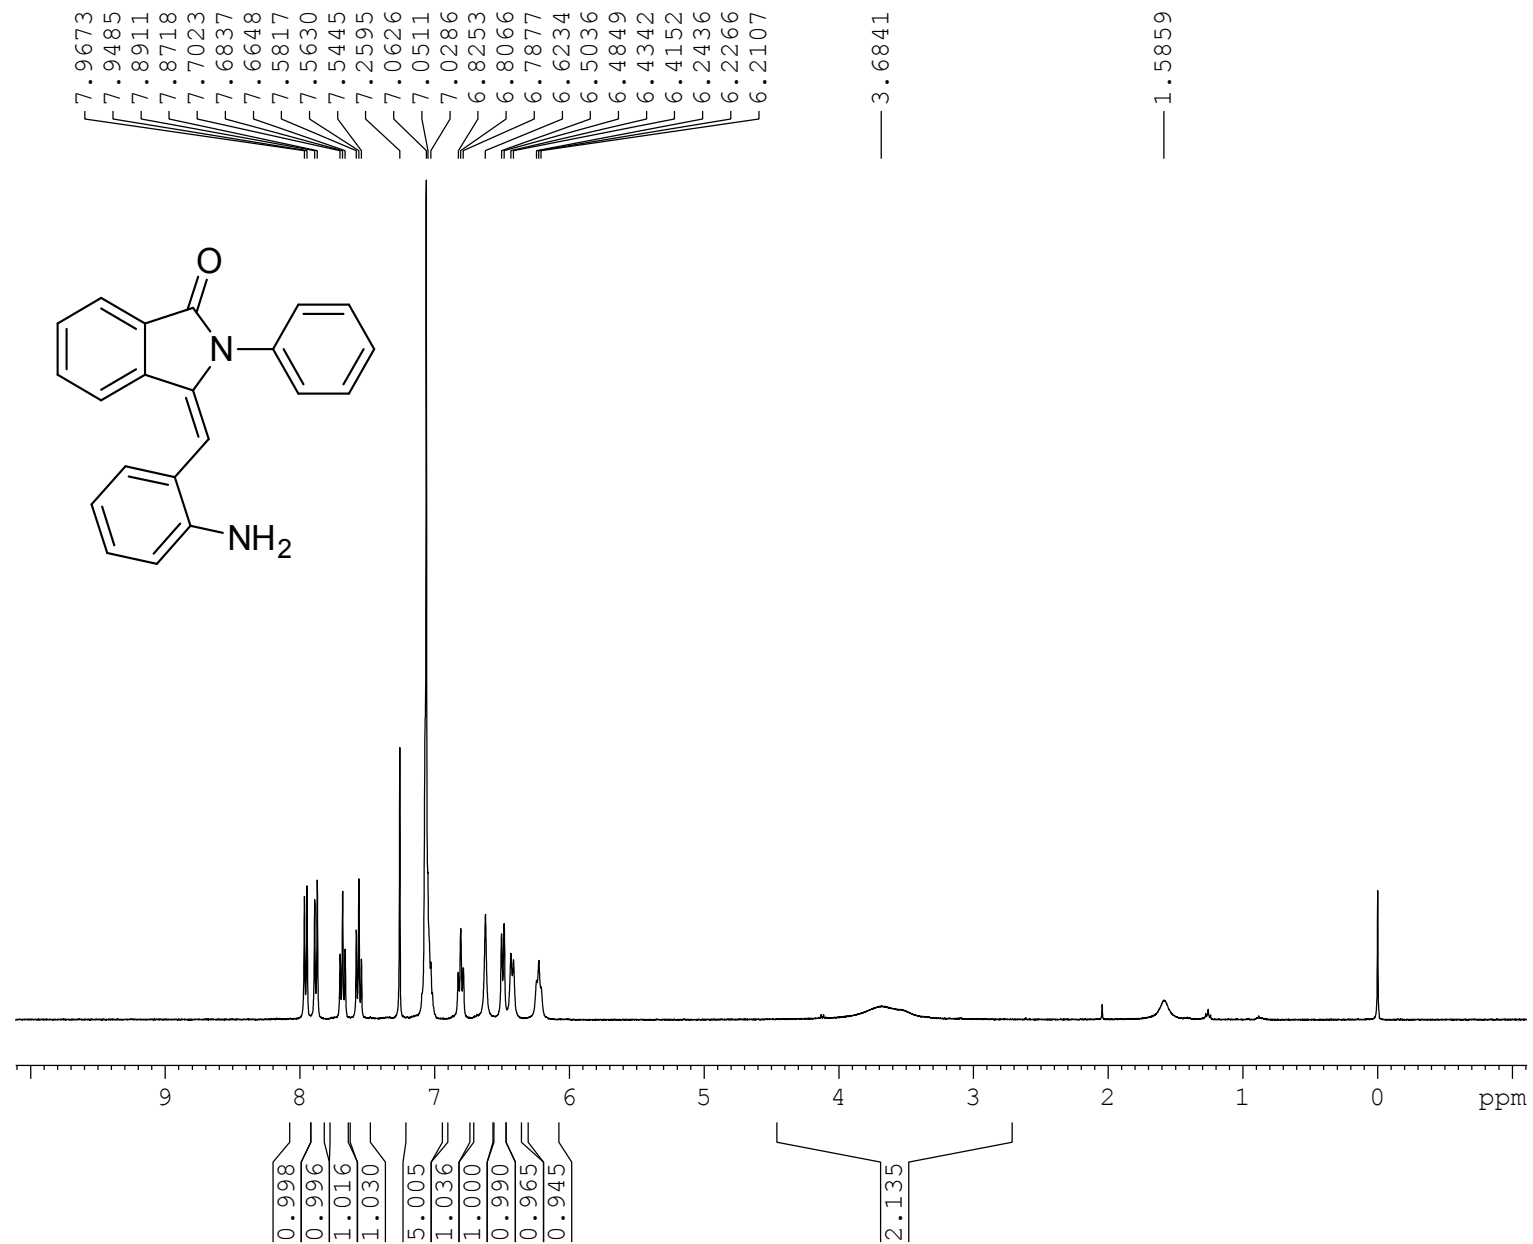

Current Data Parameters  
 NAME isoindolones  
 EXPNO 33  
 PROCNO 1

F2 - Acquisition Parameters  
 Date\_ 20160203  
 Time 13.07  
 INSTRUM spect  
 PROBHD 5 mm BBO BB-1H  
 PULPROG zg30  
 TD 32768  
 SOLVENT CDCl3  
 NS 32  
 DS 0  
 SWH 7246.377 Hz  
 FIDRES 0.221142 Hz  
 AQ 2.2609921 sec  
 RG 256  
 DW 69.000 usec  
 DE 6.50 usec  
 TE 295.7 K  
 D1 2.0000000 sec  
 TD0 1

===== CHANNEL f1 =====  
 NUC1 1H  
 P1 14.40 usec  
 PL1 1.80 dB  
 SFO1 400.1324008 MHz

F2 - Processing parameters  
 SI 16384  
 SF 400.1300096 MHz  
 WDW EM  
 SSB 0  
 LB 0 Hz  
 GB 0  
 PC 1.00

3-(2-aminobenzylidene)-2-phenylisoindolin-1-one (4g)

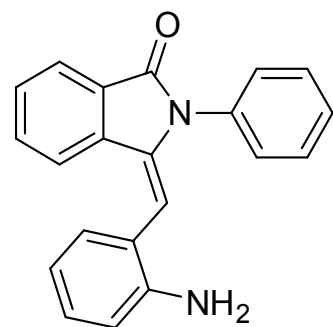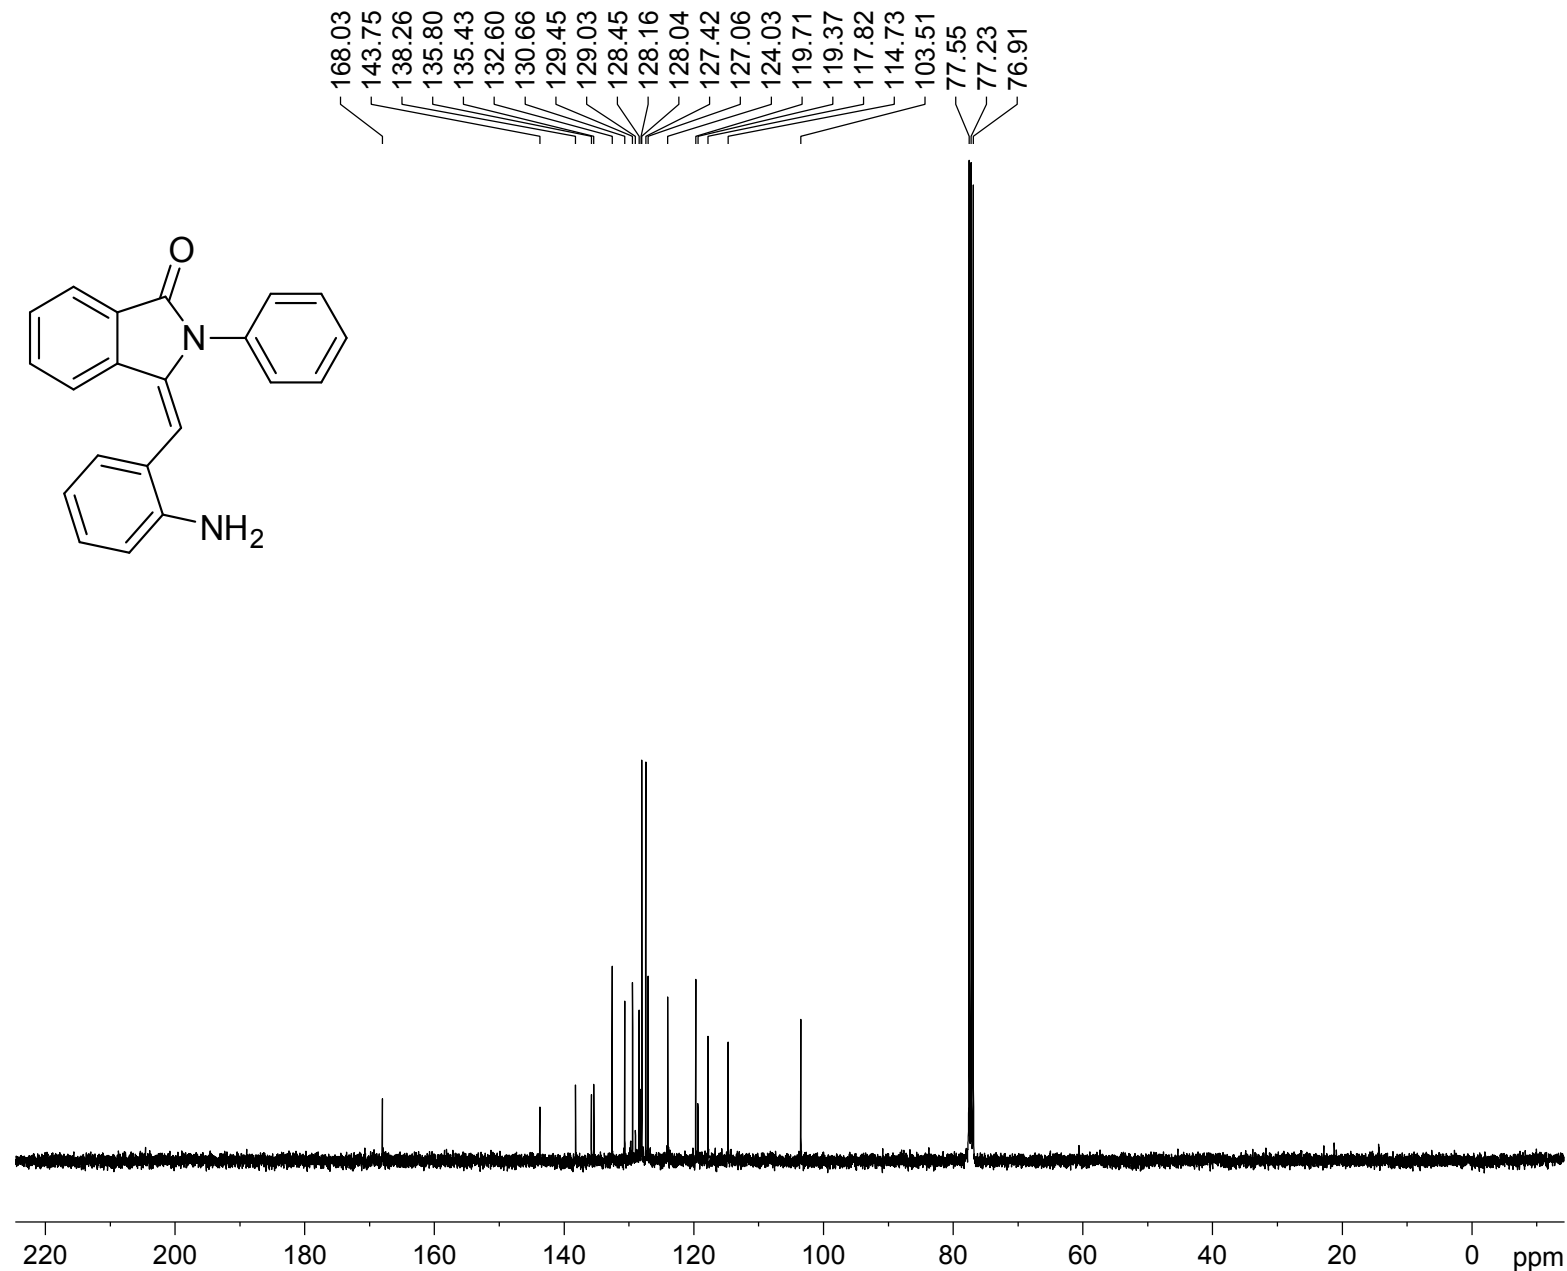

Current Data Parameters

NAME isoindolones  
EXPNO 41  
PROCNO 1

F2 - Acquisition Parameters

Date\_ 20160225  
Time 18.38  
INSTRUM spect  
PROBHD 5 mm BBO BB-1H  
PULPROG zgpg30  
TD 32768  
SOLVENT CDCl3  
NS 334  
DS 0  
SWH 24038.461 Hz  
FIDRES 0.733596 Hz  
AQ 0.6815744 sec  
RG 2896.3  
DW 20.800 usec  
DE 6.50 usec  
TE 296.0 K  
D1 2.0000000 sec  
D11 0.0300000 sec  
TD0 1

===== CHANNEL f1 =====

NUC1 13C  
P1 9.00 usec  
PL1 7.00 dB  
SFO1 100.6233325 MHz

===== CHANNEL f2 =====

CPDPRG[2] waltz16  
NUC2 1H  
PCPD2 90.00 usec  
PL2 1.80 dB  
PL12 17.00 dB  
PL13 20.00 dB  
SFO2 400.1316005 MHz

F2 - Processing parameters

SI 32768  
SF 100.6127521 MHz  
WDW EM  
SSB 0  
LB 1.00 Hz  
GB 0  
PC 1.00

3-(2-amino-4-bromobenzylidene)-6-bromo-2-phenylisoindolin-1-one (4h)

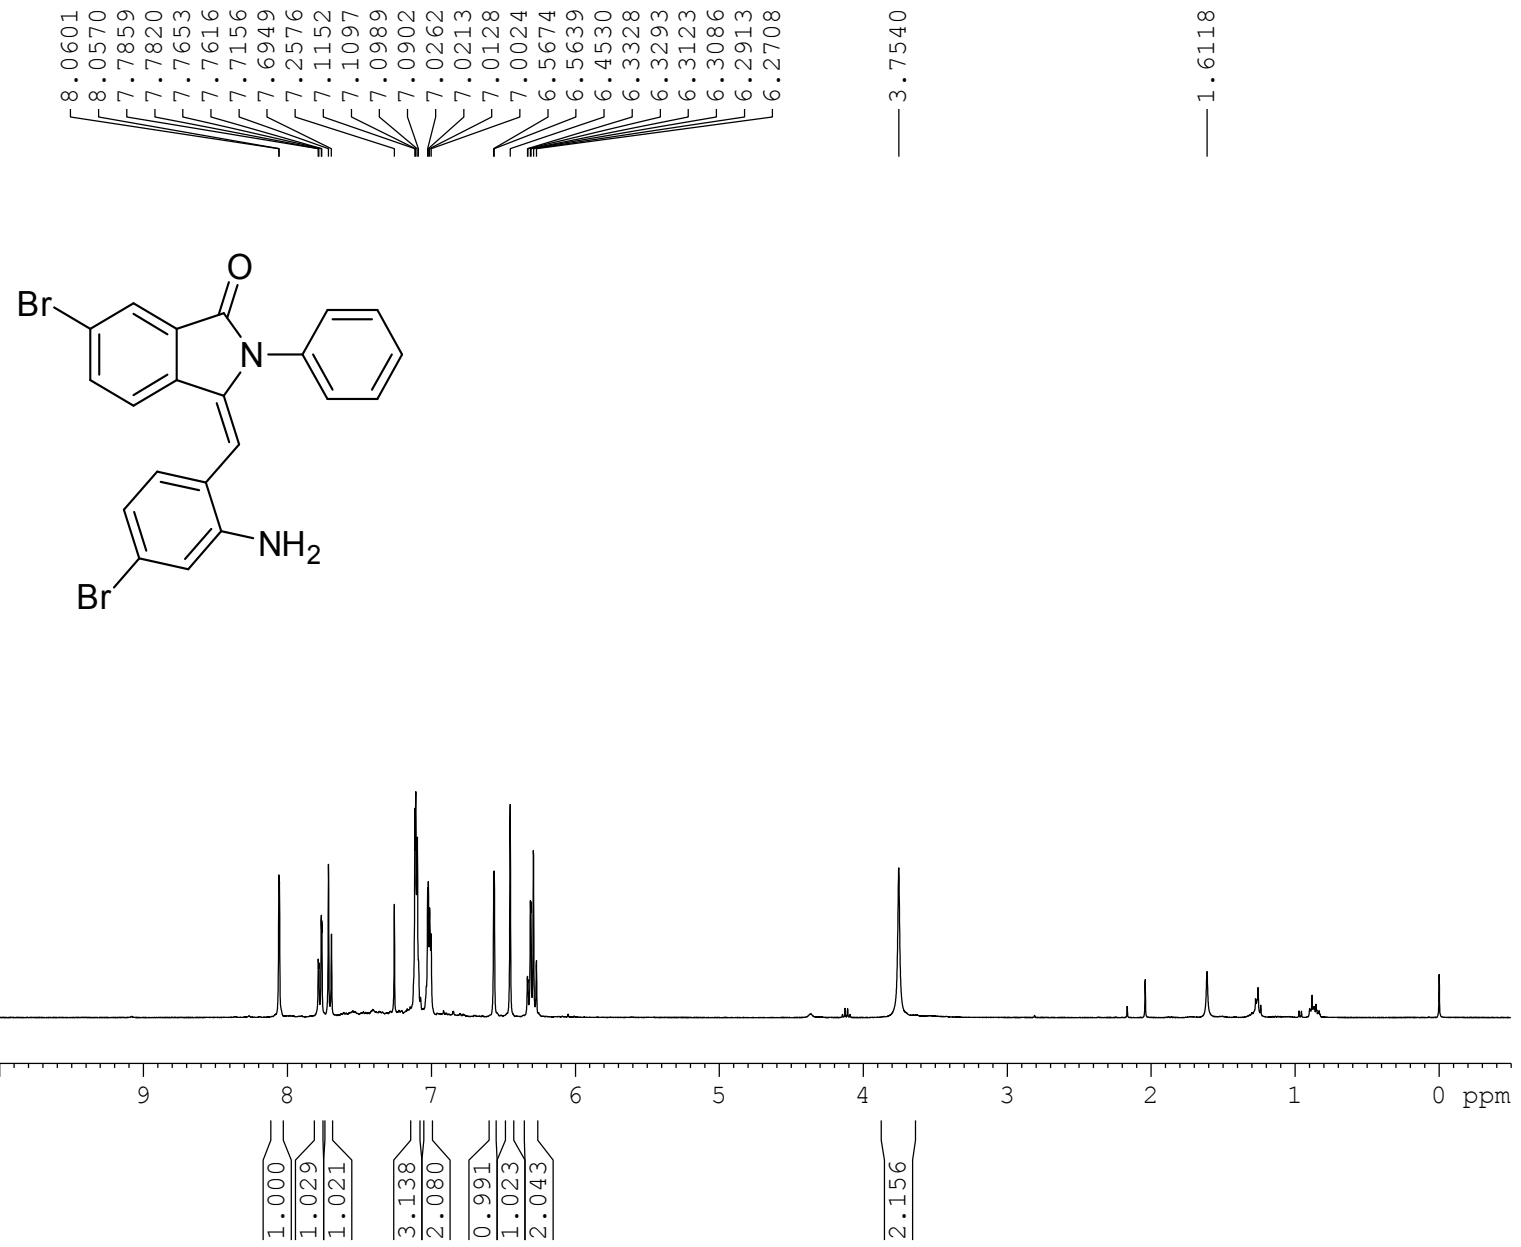

Current Data Parameters  
 NAME isoindolones  
 EXPNO 15  
 PROCNO 1

F2 - Acquisition Parameters  
 Date\_ 20160119  
 Time 21.55  
 INSTRUM spect  
 PROBHD 5 mm BBO BB-1H  
 PULPROG zg30  
 TD 32768  
 SOLVENT CDCl3  
 NS 32  
 DS 0  
 SWH 7246.377 Hz  
 FIDRES 0.221142 Hz  
 AQ 2.2609921 sec  
 RG 181  
 DW 69.000 usec  
 DE 6.50 usec  
 TE 297.8 K  
 D1 2.00000000 sec  
 TD0 1

===== CHANNEL f1 =====  
 NUC1 1H  
 P1 14.40 usec  
 PL1 1.80 dB  
 SFO1 400.1324008 MHz

F2 - Processing parameters  
 SI 16384  
 SF 400.1300104 MHz  
 WDW EM  
 SSB 0  
 LB 0 Hz  
 GB 0  
 PC 1.00

3-(2-amino-4-bromobenzylidene)-6-bromo-2-phenylisoindolin-1-one (4h)

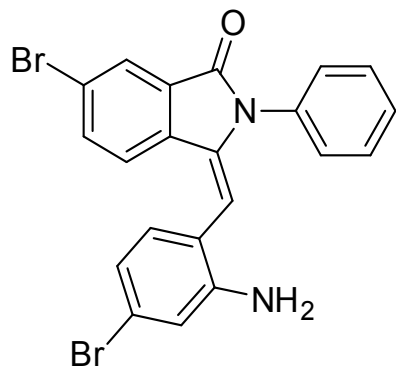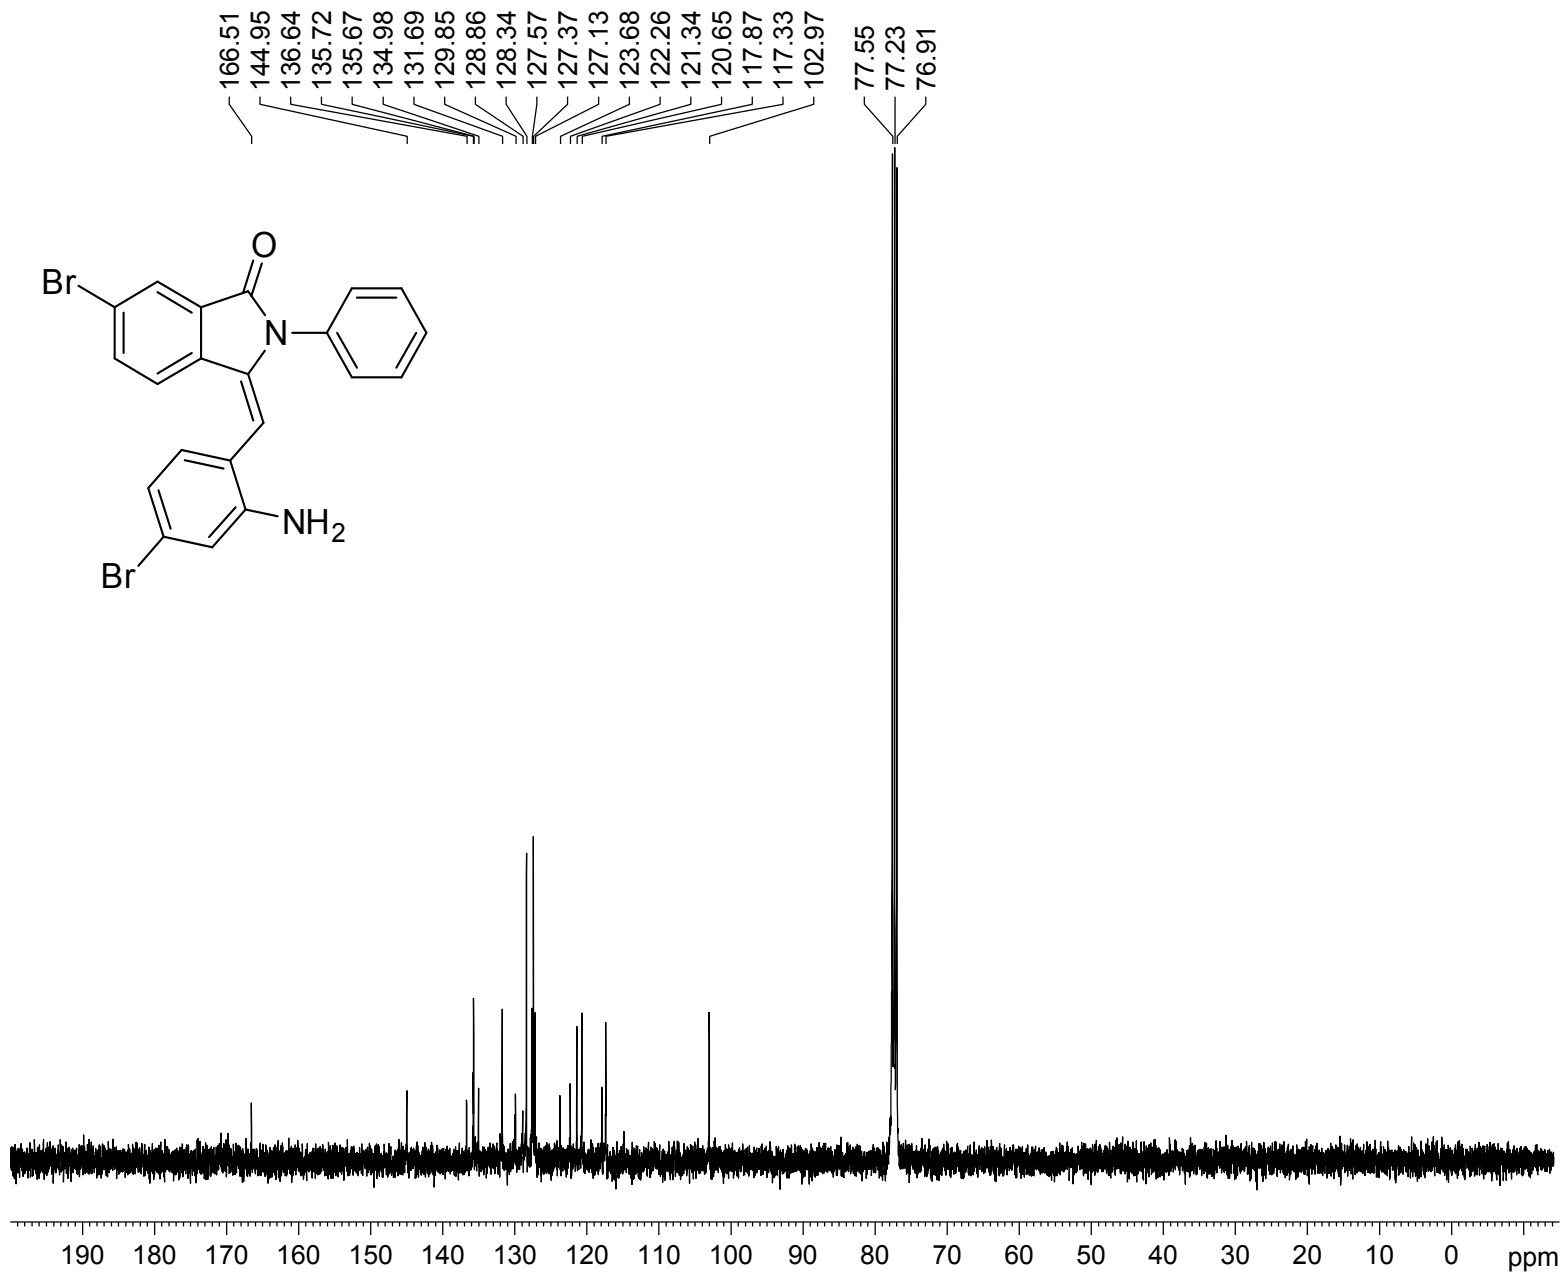

Current Data Parameters

NAME isoindolones  
EXPNO 30  
PROCNO 1

F2 - Acquisition Parameters

Date\_ 20160202  
Time 21.00  
INSTRUM spect  
PROBHD 5 mm BBO BB-1H  
PULPROG zgpg30  
TD 32768  
SOLVENT CDCl3  
NS 480  
DS 0  
SWH 24038.461 Hz  
FIDRES 0.733596 Hz  
AQ 0.6815744 sec  
RG 8192  
DW 20.800 usec  
DE 6.50 usec  
TE 296.6 K  
D1 2.00000000 sec  
D11 0.03000000 sec  
TD0 1

===== CHANNEL f1 =====

NUC1 13C  
P1 9.00 usec  
PL1 7.00 dB  
SFO1 100.6233325 MHz

===== CHANNEL f2 =====

CPDPRG[2] waltz16  
NUC2 1H  
PCPD2 90.00 usec  
PL2 1.80 dB  
PL12 17.00 dB  
PL13 20.00 dB  
SFO2 400.1316005 MHz

F2 - Processing parameters

SI 32768  
SF 100.6127499 MHz  
WDW EM  
SSB 0  
LB 1.00 Hz  
GB 0  
PC 1.00

3-(2-amino-5-chlorobenzylidene)-6-bromo-2-phenylisoindolin-1-one (4i)

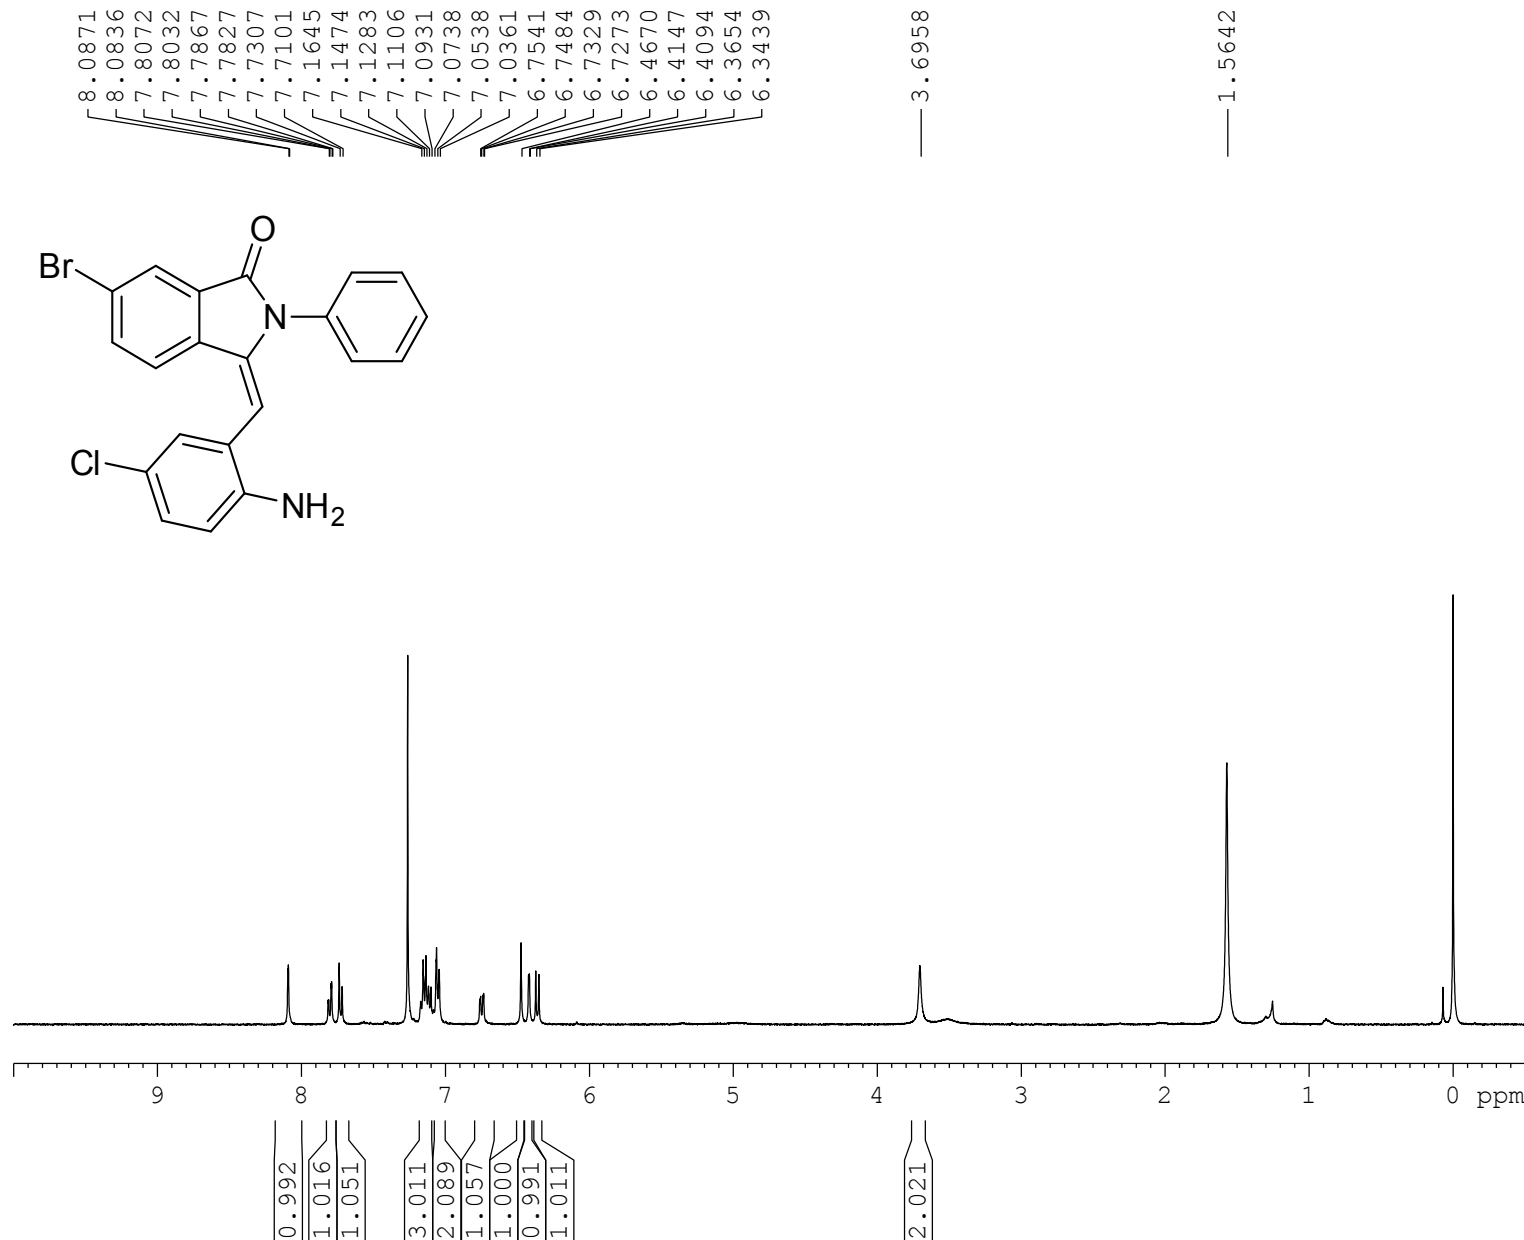

Current Data Parameters  
 NAME isoindolones  
 EXPNO 38  
 PROCNO 1

F2 - Acquisition Parameters  
 Date\_ 20160222  
 Time 13.53  
 INSTRUM spect  
 PROBHD 5 mm BBO BB-1H  
 PULPROG zg30  
 TD 32768  
 SOLVENT CDCl3  
 NS 32  
 DS 0  
 SWH 7246.377 Hz  
 FIDRES 0.221142 Hz  
 AQ 2.2609921 sec  
 RG 322.5  
 DW 69.000 usec  
 DE 6.50 usec  
 TE 295.3 K  
 D1 2.0000000 sec  
 TD0 1

===== CHANNEL f1 =====  
 NUC1 1H  
 P1 14.40 usec  
 PL1 1.80 dB  
 SFO1 400.1324008 MHz

F2 - Processing parameters  
 SI 16384  
 SF 400.1300087 MHz  
 WDW EM  
 SSB 0  
 LB 0 Hz  
 GB 0  
 PC 1.00

3-(2-amino-5-chlorobenzylidene)-6-bromo-2-phenylisoindolin-1-one (4i)

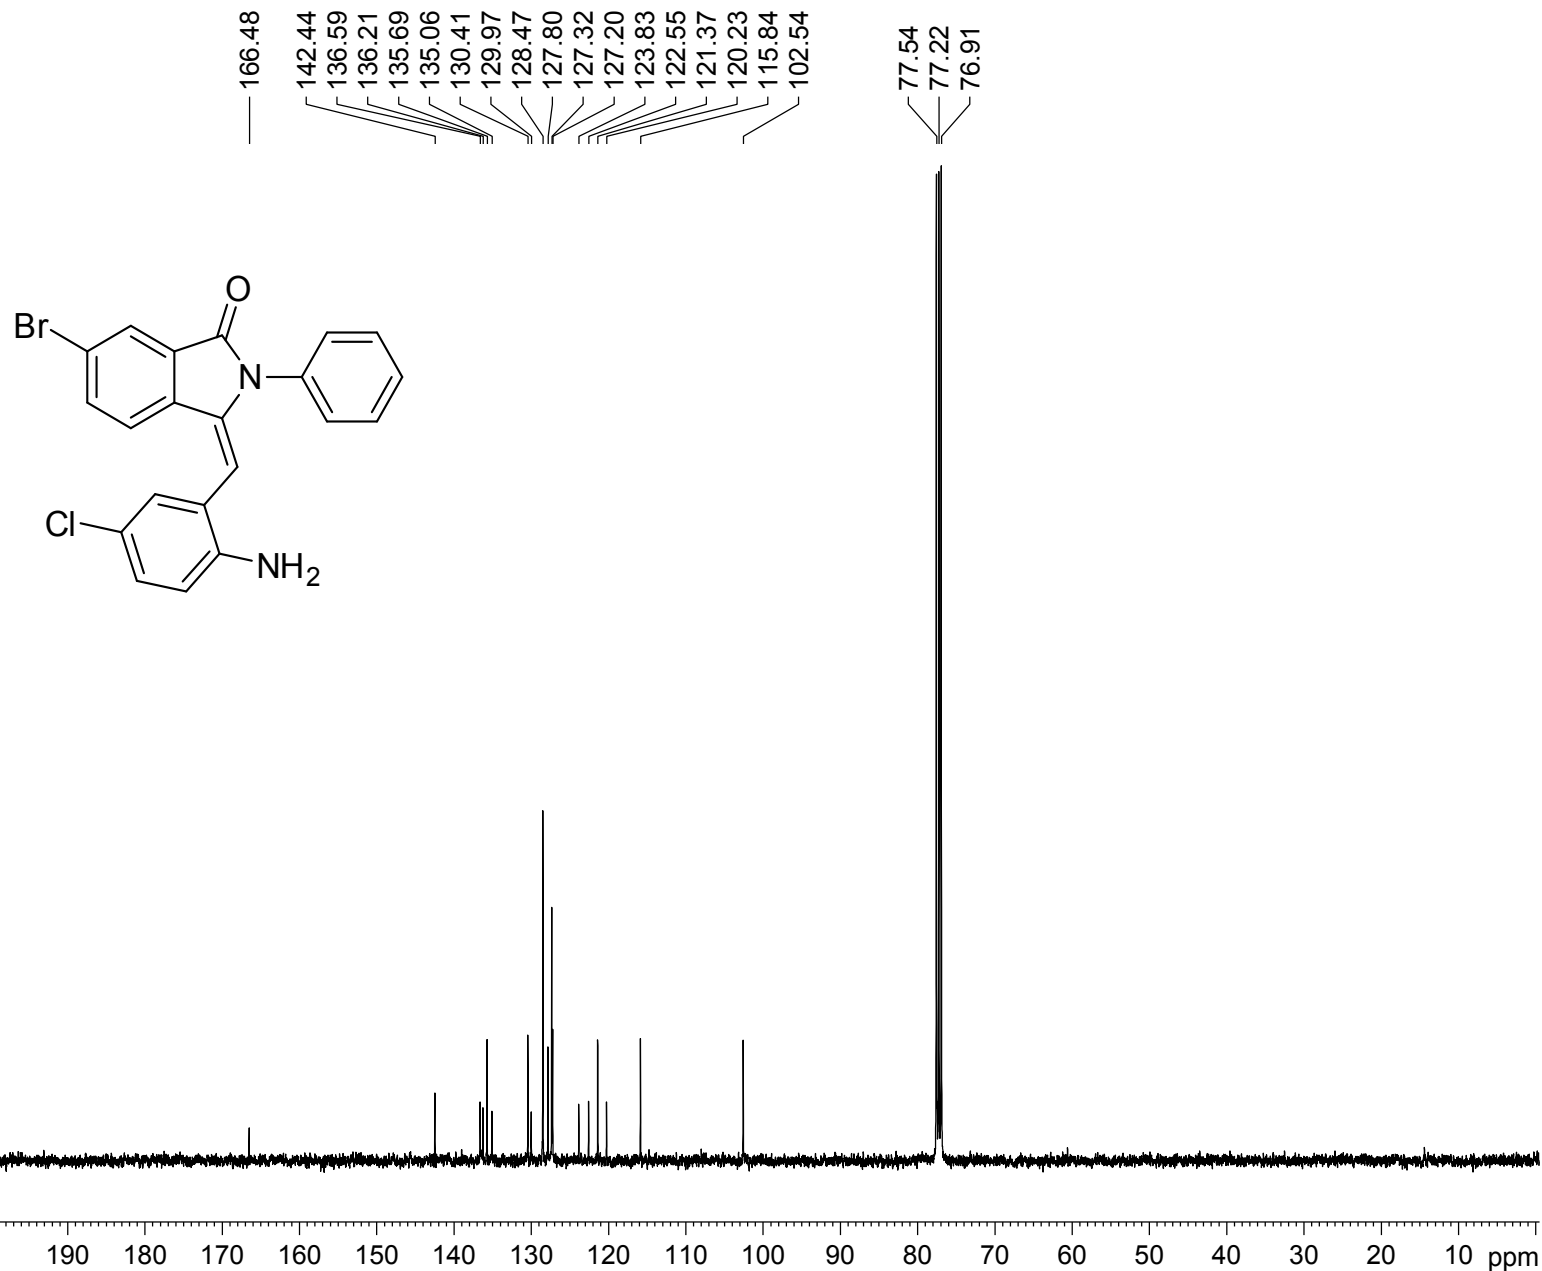

Current Data Parameters

NAME project 1  
 EXPNO 202  
 PROCNO 1

F2 - Acquisition Parameters

Date\_ 20160216  
 Time 22.46  
 INSTRUM spect  
 PROBHD 5 mm PABBO BB/  
 PULPROG zgpg30  
 TD 32768  
 SOLVENT CDCl3  
 NS 605  
 DS 0  
 SWH 24038.461 Hz  
 FIDRES 0.733596 Hz  
 AQ 0.6815744 sec  
 RG 198.09  
 DW 20.800 usec  
 DE 6.50 usec  
 TE 298.2 K  
 D1 2.00000000 sec  
 D11 0.03000000 sec  
 TD0 1

===== CHANNEL f1 =====

SFO1 100.6228298 MHz  
 NUC1 13C  
 P1 10.00 usec  
 PLW1 47.50000000 W

===== CHANNEL f2 =====

SFO2 400.1316005 MHz  
 NUC2 1H  
 CPDPRG[2] waltz16  
 PCPD2 90.00 usec  
 PLW2 15.00000000 W  
 PLW12 0.33750001 W  
 PLW13 0.27338001 W

F2 - Processing parameters

SI 32768  
 SF 100.6127479 MHz  
 WDW EM  
 SSB 0  
 LB 2.00 Hz  
 GB 0  
 PC 1.00



3-(2-amino-4-methoxybenzylidene)-2-phenylisoindolin-1-one (4j)

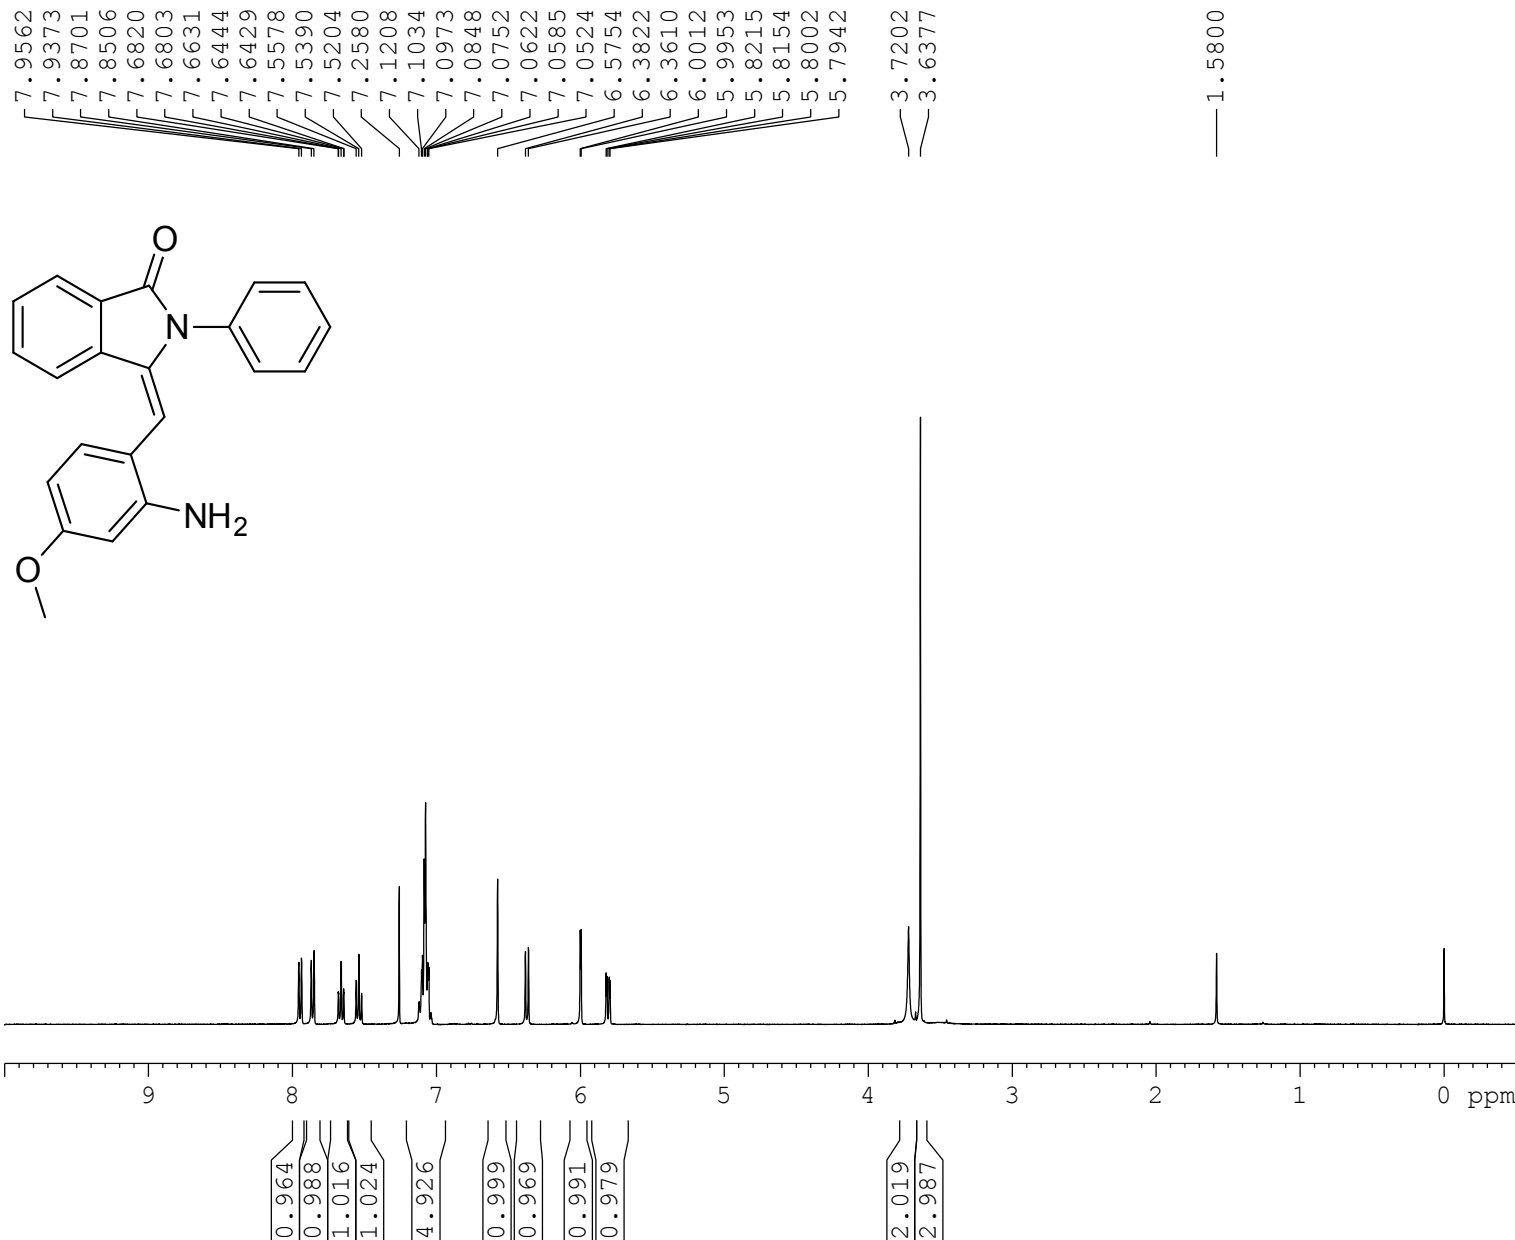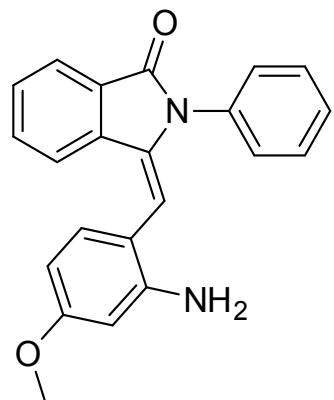

Current Data Parameters  
 NAME isoindolones  
 EXPNO 3  
 PROCNO 1

F2 - Acquisition Parameters  
 Date\_ 20151220  
 Time 15.42  
 INSTRUM spect  
 PROBHD 5 mm BBO BB-1H  
 PULPROG zg30  
 TD 32768  
 SOLVENT CDCl3  
 NS 32  
 DS 0  
 SWH 7246.377 Hz  
 FIDRES 0.221142 Hz  
 AQ 2.2609921 sec  
 RG 256  
 DW 69.000 usec  
 DE 6.50 usec  
 TE 297.5 K  
 D1 2.0000000 sec  
 TD0 1

===== CHANNEL f1 =====  
 NUC1 1H  
 P1 14.40 usec  
 PL1 1.80 dB  
 SFO1 400.1324008 MHz

F2 - Processing parameters  
 SI 16384  
 SF 400.1300100 MHz  
 WDW EM  
 SSB 0  
 LB 0 Hz  
 GB 0  
 PC 1.00

3-(2-amino-4-methoxybenzylidene)-2-phenylisoindolin-1-one (4j)

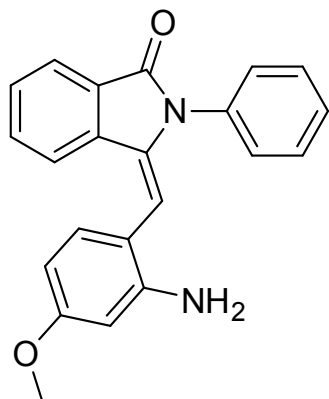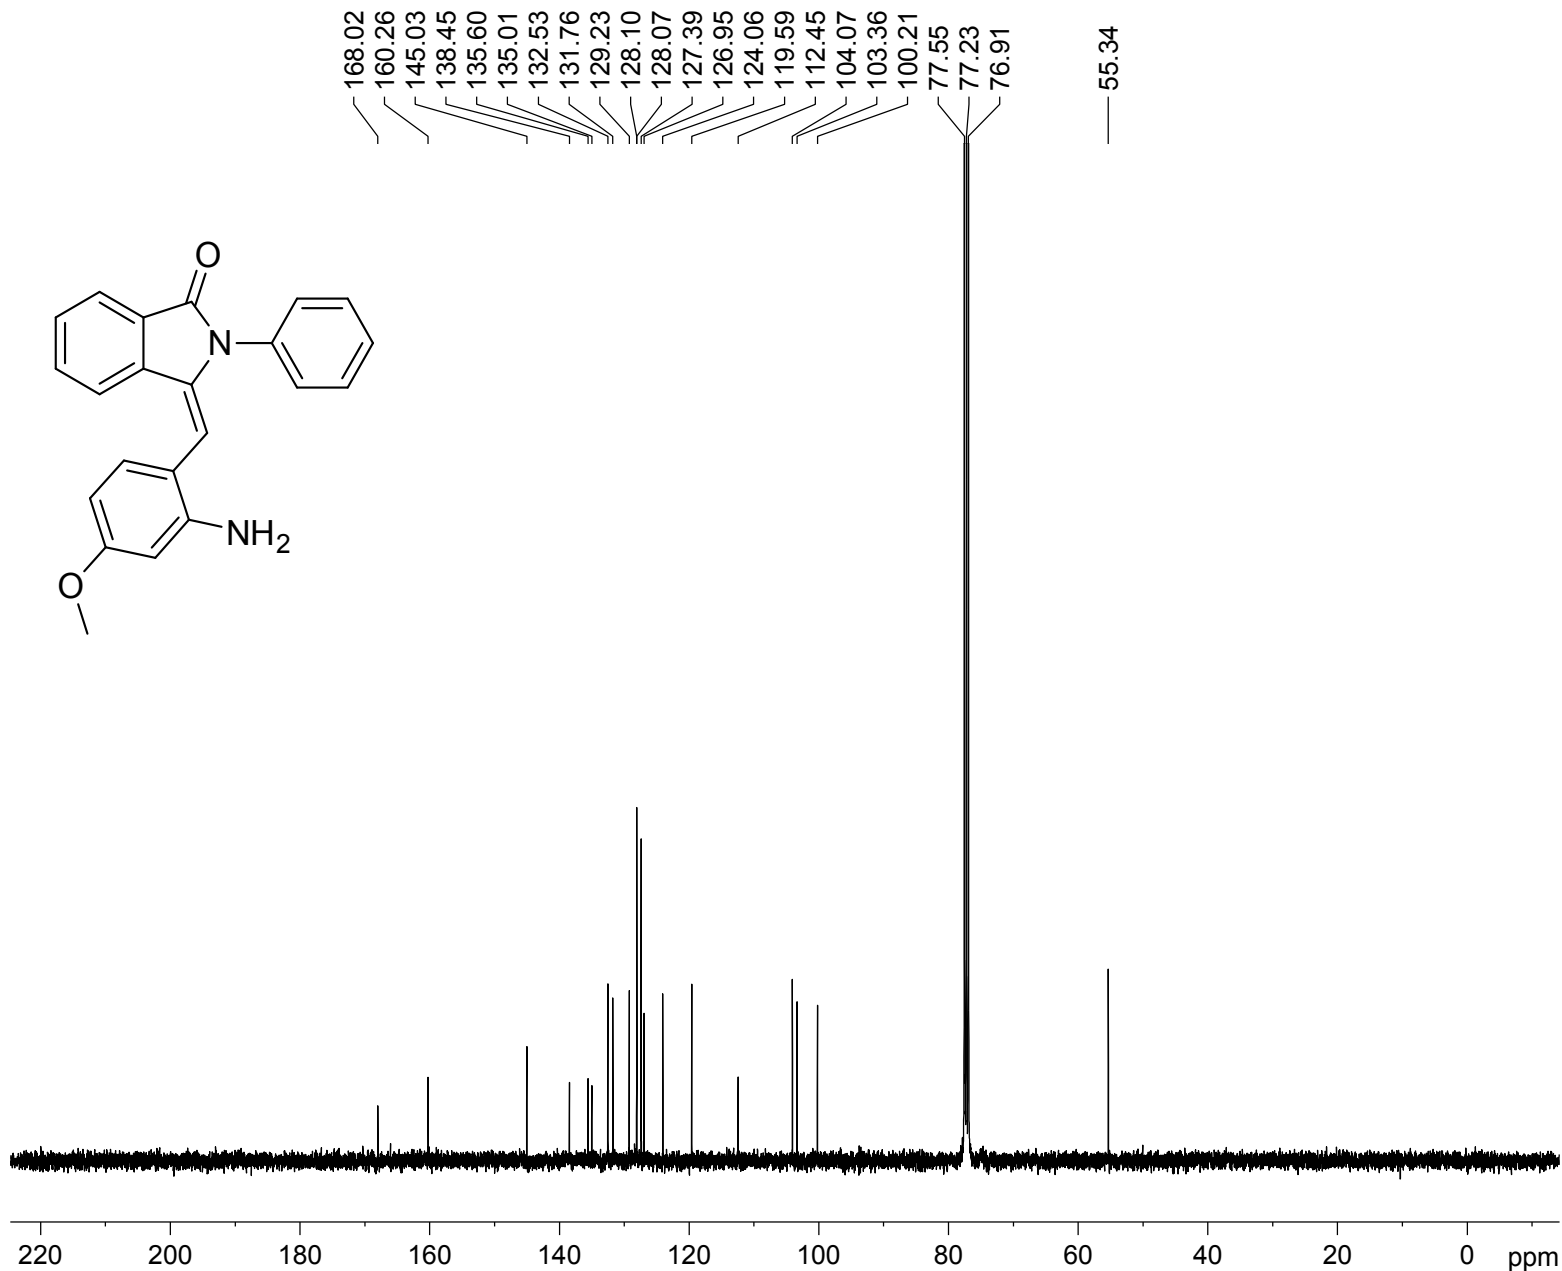

Current Data Parameters

NAME isoindolones  
EXPNO 4  
PROCNO 1

F2 - Acquisition Parameters

Date\_ 20151220  
Time 15.44  
INSTRUM spect  
PROBHD 5 mm BBO BB-1H  
PULPROG zgpg30  
TD 32768  
SOLVENT CDCl3  
NS 1300  
DS 0  
SWH 24038.461 Hz  
FIDRES 0.733596 Hz  
AQ 0.6815744 sec  
RG 8192  
DW 20.800 usec  
DE 6.50 usec  
TE 297.4 K  
D1 2.00000000 sec  
D11 0.03000000 sec  
TD0 1

==== CHANNEL f1 =====

NUC1 13C  
P1 9.00 usec  
PL1 7.00 dB  
SFO1 100.6233325 MHz

==== CHANNEL f2 =====

CPDPRG[2] waltz16  
NUC2 1H  
PCPD2 90.00 usec  
PL2 1.80 dB  
PL12 17.00 dB  
PL13 20.00 dB  
SFO2 400.1316005 MHz

F2 - Processing parameters

SI 32768  
SF 100.6127477 MHz  
WDW EM  
SSB 0  
LB 1.00 Hz  
GB 0  
PC 1.00

3-(2-amino-5-chlorobenzylidene)-2-phenylisoindolin-1-one (4k)

7.9632  
7.9444  
7.8643  
7.8449  
7.7041  
7.6855  
7.6667  
7.5950  
7.5765  
7.5580  
7.2601  
7.1614  
7.1443  
7.1252  
7.1020  
7.0848  
7.0702  
7.0527  
6.7483  
6.7427  
6.7271  
6.7214  
6.4731  
6.4363  
6.4309  
6.3596  
6.3383

3.7118

1.6021

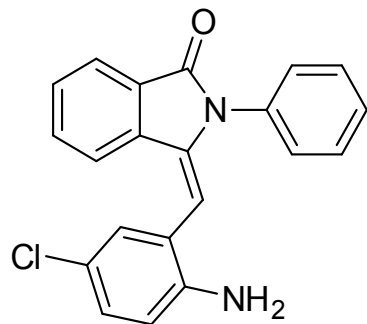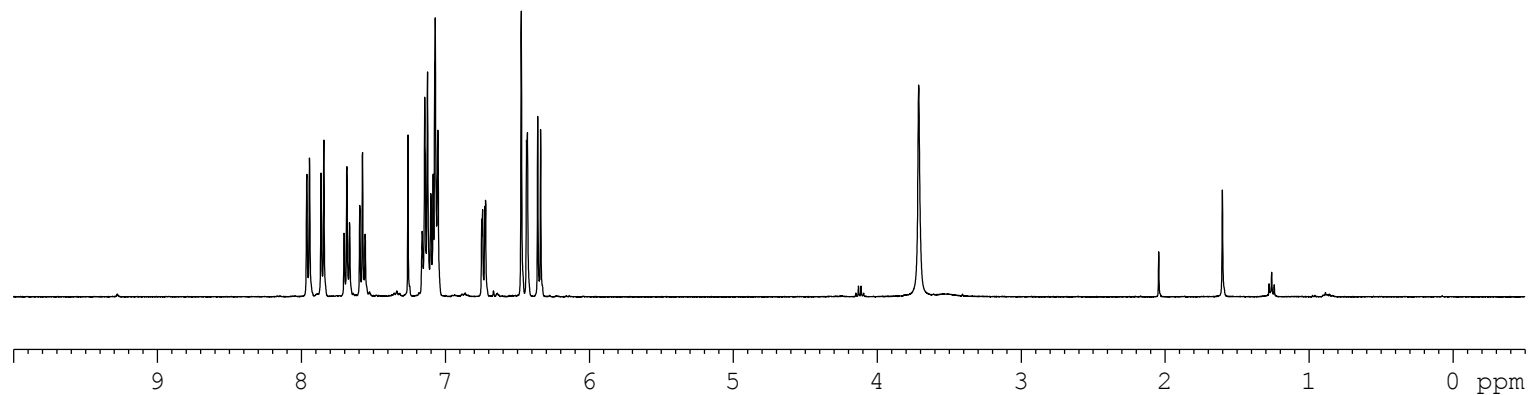

0.969  
1.011  
0.990  
1.035  
2.025  
2.970  
0.959  
0.970  
0.923  
0.982

2.000

Current Data Parameters  
NAME isoindolones  
EXPNO 20  
PROCNO 1

F2 - Acquisition Parameters  
Date\_ 20160129  
Time 13.40  
INSTRUM spect  
PROBHD 5 mm BBO BB-1H  
PULPROG zg30  
TD 32768  
SOLVENT CDCl3  
NS 32  
DS 0  
SWH 7246.377 Hz  
FIDRES 0.221142 Hz  
AQ 2.2609921 sec  
RG 181  
DW 69.000 usec  
DE 6.50 usec  
TE 297.7 K  
D1 2.0000000 sec  
TD0 1

===== CHANNEL f1 =====  
NUC1 1H  
P1 14.40 usec  
PL1 1.80 dB  
SFO1 400.1324008 MHz

F2 - Processing parameters  
SI 16384  
SF 400.1300096 MHz  
WDW EM  
SSB 0  
LB 0 Hz  
GB 0  
PC 1.00

3-(2-amino-5-chlorobenzylidene)-2-phenylisoindolin-1-one (4k)

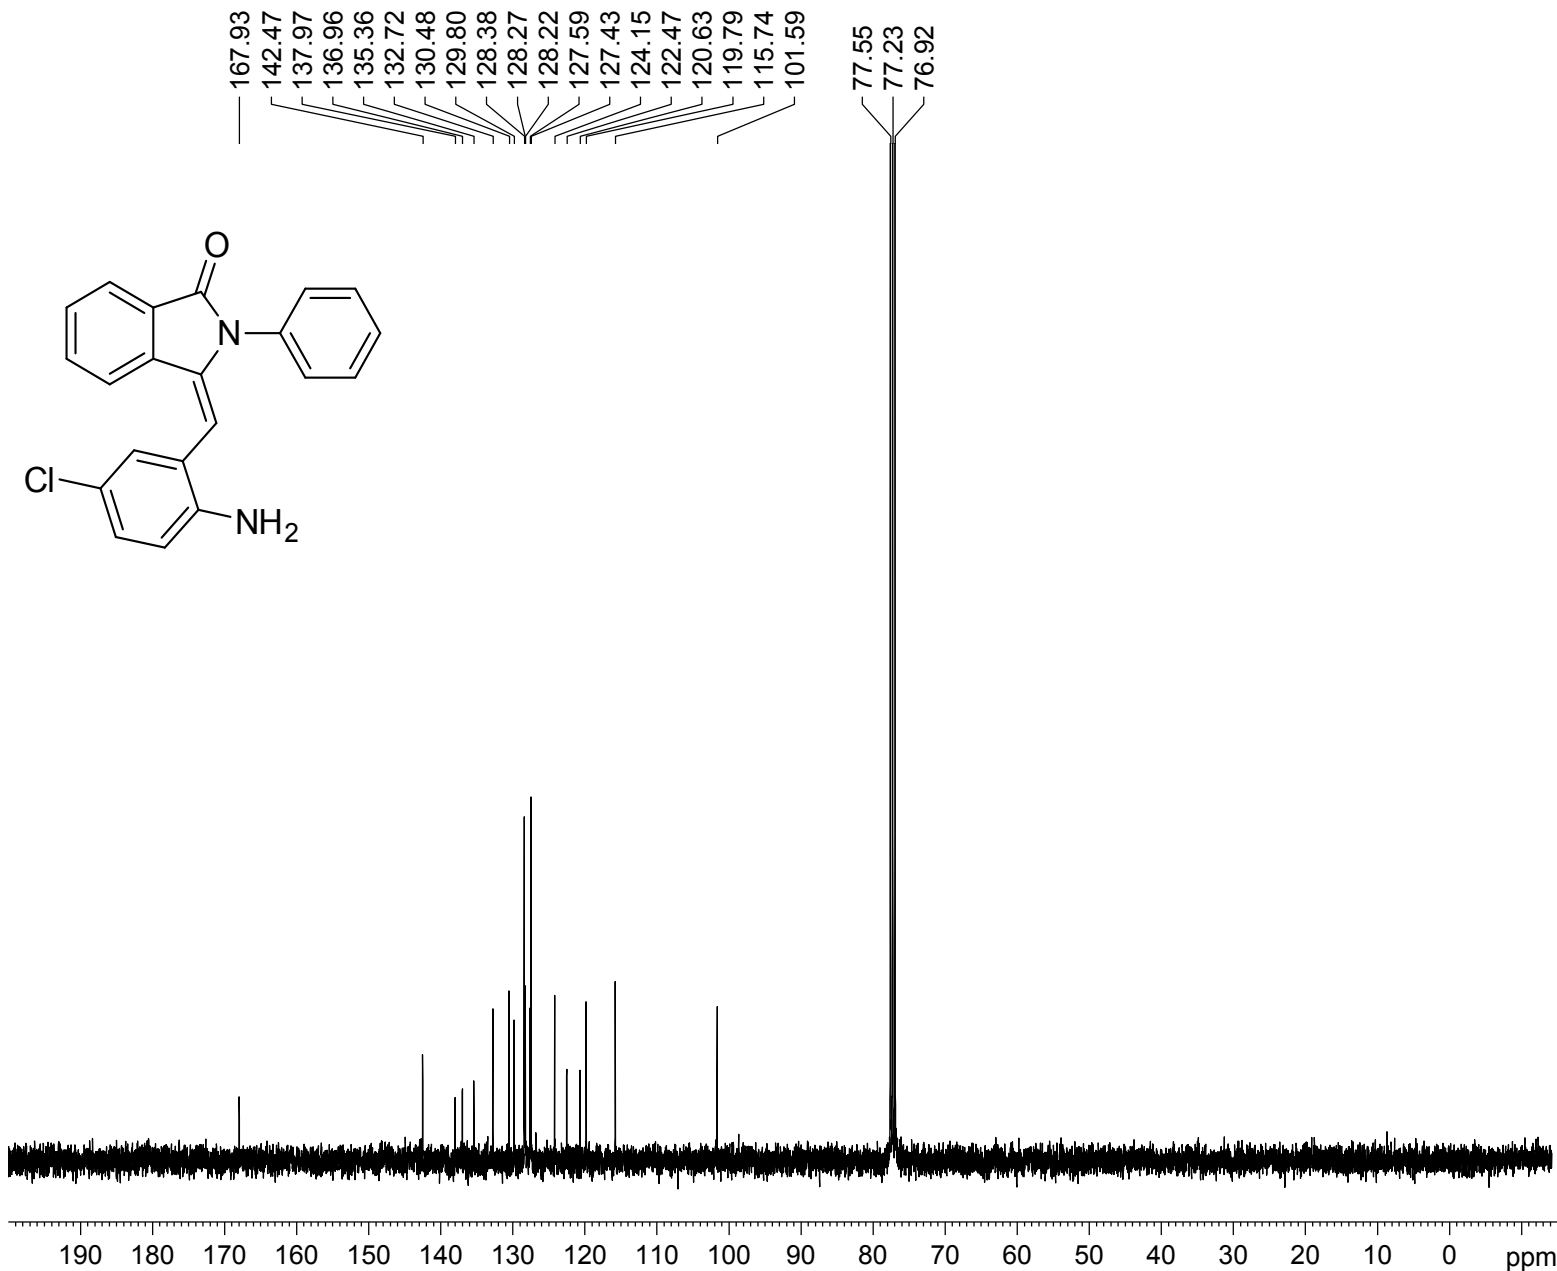

Current Data Parameters

NAME isoindolones  
EXPNO 21  
PROCNO 1

F2 - Acquisition Parameters

Date\_ 20160129  
Time 13.46  
INSTRUM spect  
PROBHD 5 mm BBO BB-1H  
PULPROG zgpg30  
TD 32768  
SOLVENT CDCl3  
NS 158  
DS 0  
SWH 24038.461 Hz  
FIDRES 0.733596 Hz  
AQ 0.6815744 sec  
RG 8192  
DW 20.800 usec  
DE 6.50 usec  
TE 297.8 K  
D1 2.00000000 sec  
D11 0.03000000 sec  
TD0 1

==== CHANNEL f1 =====

NUC1 13C  
P1 9.00 usec  
PL1 7.00 dB  
SFO1 100.6233325 MHz

==== CHANNEL f2 =====

CPDPRG[2] waltz16  
NUC2 1H  
PCPD2 90.00 usec  
PL2 1.80 dB  
PL12 17.00 dB  
PL13 20.00 dB  
SFO2 400.1316005 MHz

F2 - Processing parameters

SI 32768  
SF 100.6127485 MHz  
WDW EM  
SSB 0  
LB 1.00 Hz  
GB 0  
PC 1.00

3-(2-aminobenzylidene)-2-benzylisoindolin-1-one (4l)

7.9358  
7.7690  
7.7499  
7.6454  
7.6270  
7.6083  
7.5591  
7.5405  
7.5219  
7.2565  
7.1496  
7.1305  
7.1119  
7.0946  
7.0770  
7.0601  
7.0413  
7.0241  
6.9815  
6.9630  
6.7550  
6.7365  
6.7182  
6.5731  
6.5532  
6.5291  
6.5108  
6.4150  
4.9607

3.1975

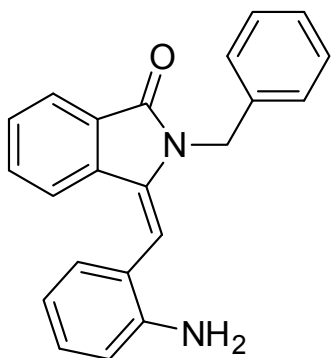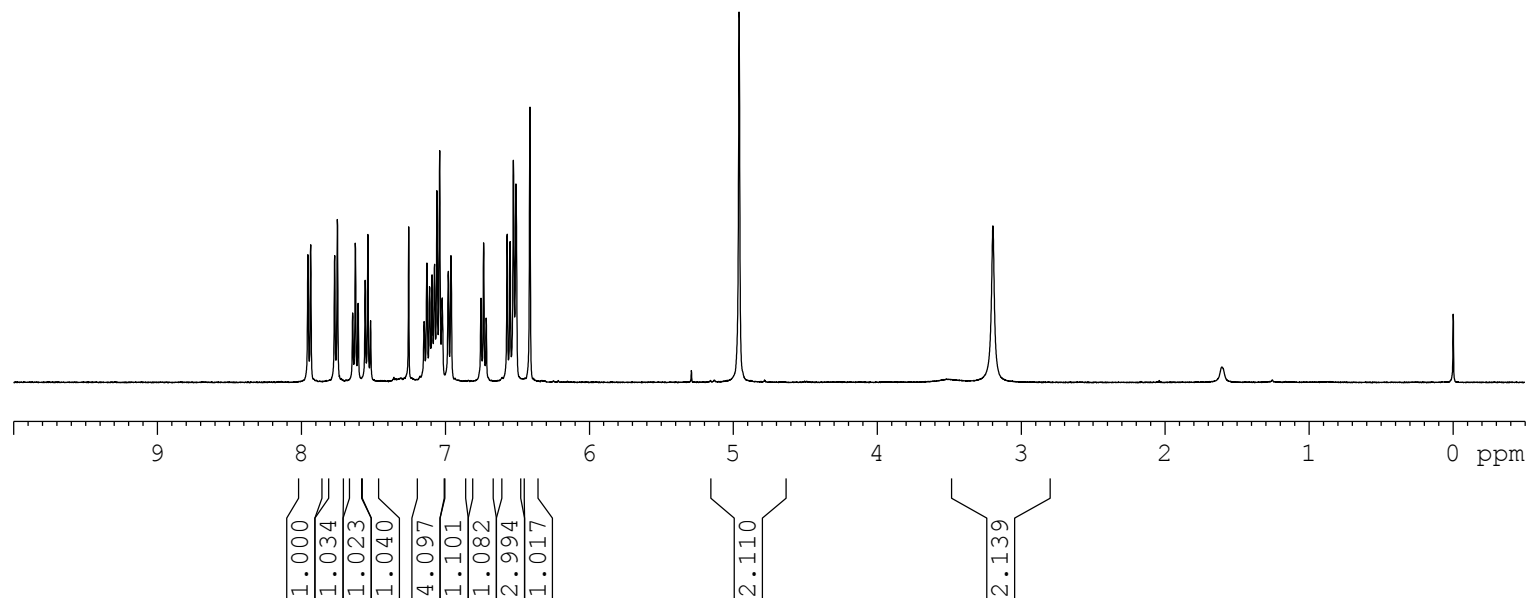

Current Data Parameters  
NAME isoindolones  
EXPNO 5  
PROCNO 1

F2 - Acquisition Parameters  
Date\_ 20151220  
Time 16.47  
INSTRUM spect  
PROBHD 5 mm BBO BB-1H  
PULPROG zg30  
TD 32768  
SOLVENT CDCl3  
NS 32  
DS 0  
SWH 7246.377 Hz  
FIDRES 0.221142 Hz  
AQ 2.2609921 sec  
RG 181  
DW 69.000 usec  
DE 6.50 usec  
TE 297.7 K  
D1 2.0000000 sec  
TD0 1

===== CHANNEL f1 =====  
NUC1 1H  
P1 14.40 usec  
PL1 1.80 dB  
SFO1 400.1324008 MHz

F2 - Processing parameters  
SI 16384  
SF 400.1300107 MHz  
WDW EM  
SSB 0  
LB 0 Hz  
GB 0  
PC 1.00

3-(2-aminobenzylidene)-2-benzylisoindolin-1-one (4l)

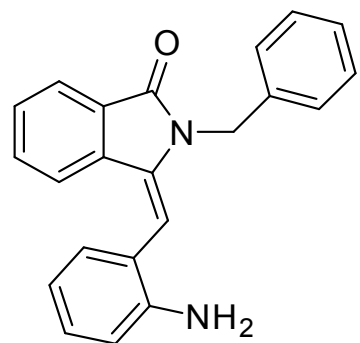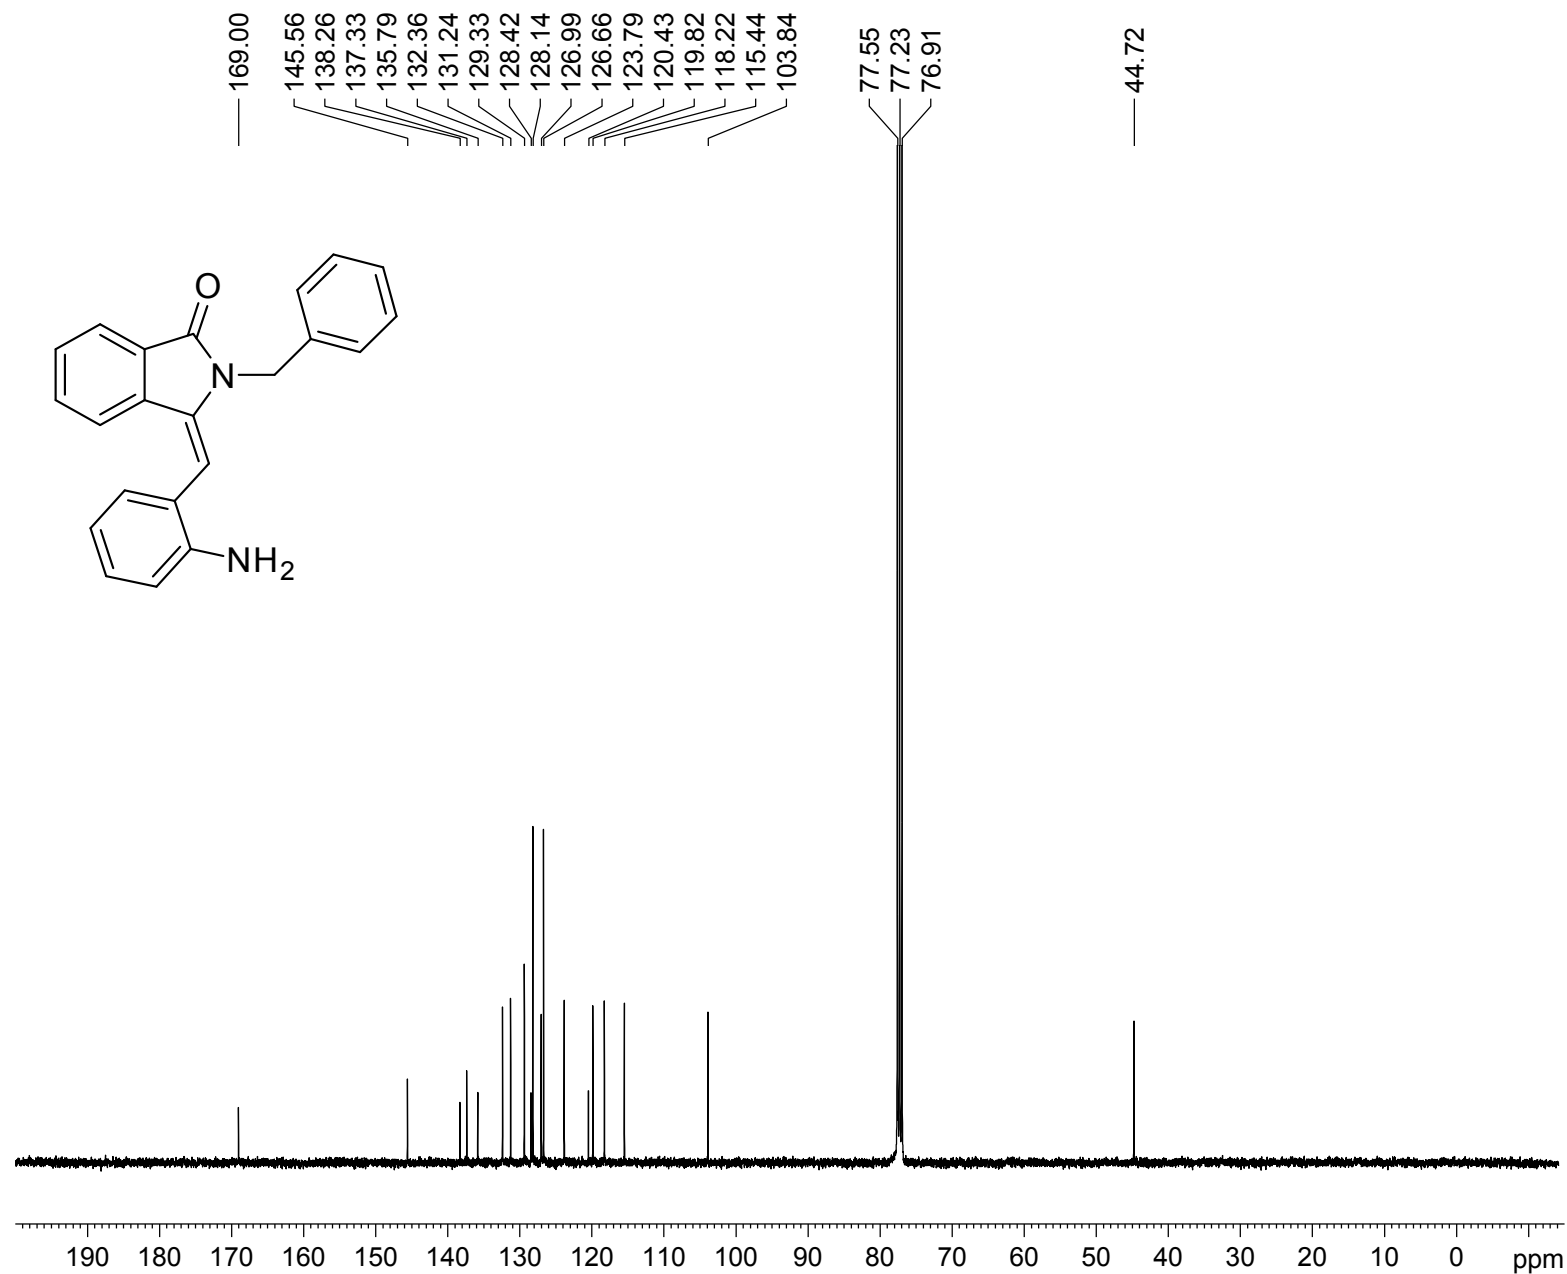

Current Data Parameters

NAME isoindolones  
EXPNO 6  
PROCNO 1

F2 - Acquisition Parameters

Date\_ 20151220  
Time 16.50  
INSTRUM spect  
PROBHD 5 mm BBO BB-1H  
PULPROG zgpg30  
TD 32768  
SOLVENT CDCl3  
NS 1762  
DS 0  
SWH 24038.461 Hz  
FIDRES 0.733596 Hz  
AQ 0.6815744 sec  
RG 8192  
DW 20.800 usec  
DE 6.50 usec  
TE 297.5 K  
D1 2.00000000 sec  
D11 0.03000000 sec  
TD0 1

===== CHANNEL f1 =====

NUC1 13C  
P1 9.00 usec  
PL1 7.00 dB  
SFO1 100.6233325 MHz

===== CHANNEL f2 =====

CPDPRG[2] waltz16  
NUC2 1H  
PCPD2 90.00 usec  
PL2 1.80 dB  
PL12 17.00 dB  
PL13 20.00 dB  
SFO2 400.1316005 MHz

F2 - Processing parameters

SI 32768  
SF 100.6127485 MHz  
WDW EM  
SSB 0  
LB 1.00 Hz  
GB 0  
PC 1.00

3-(2-amino-4-bromobenzylidene)-2-benzylisoindolin-1-one (4m)

7.9534  
7.9346  
7.7575  
7.7384  
7.6533  
7.6350  
7.6160  
7.5722  
7.5535  
7.5349  
7.2581  
7.1140  
7.0949  
7.0763  
7.0607  
6.8386  
6.8344  
6.8185  
6.8144  
6.7878  
6.7677  
6.7024  
6.6983  
6.5704  
6.5536  
6.2694  
4.9355

3.2727

1.6011

Current Data Parameters  
NAME isoindolones  
EXPNO 1  
PROCNO 1

F2 - Acquisition Parameters  
Date\_ 20151220  
Time 23.22  
INSTRUM spect  
PROBHD 5 mm BBO BB-1H  
PULPROG zg30  
TD 32768  
SOLVENT CDCl3  
NS 32  
DS 0  
SWH 7246.377 Hz  
FIDRES 0.221142 Hz  
AQ 2.2609921 sec  
RG 181  
DW 69.000 usec  
DE 6.50 usec  
TE 297.6 K  
D1 2.0000000 sec  
TD0 1

===== CHANNEL f1 =====  
NUC1 1H  
P1 14.40 usec  
PL1 1.80 dB  
SFO1 400.1324008 MHz

F2 - Processing parameters  
SI 16384  
SF 400.1300102 MHz  
WDW EM  
SSB 0  
LB 0 Hz  
GB 0  
PC 1.00

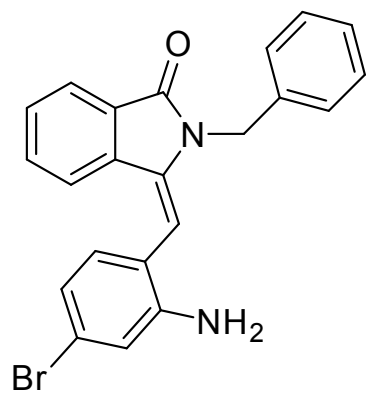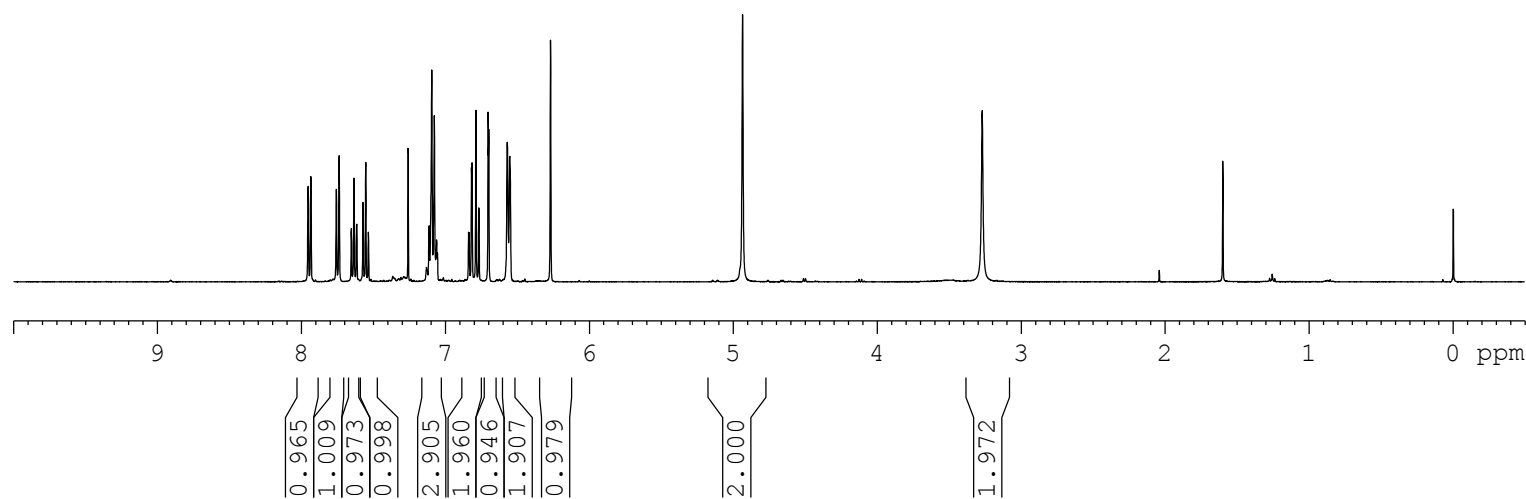

3-(2-amino-4-bromobenzylidene)-2-benzylisoindolin-1-one (4m)

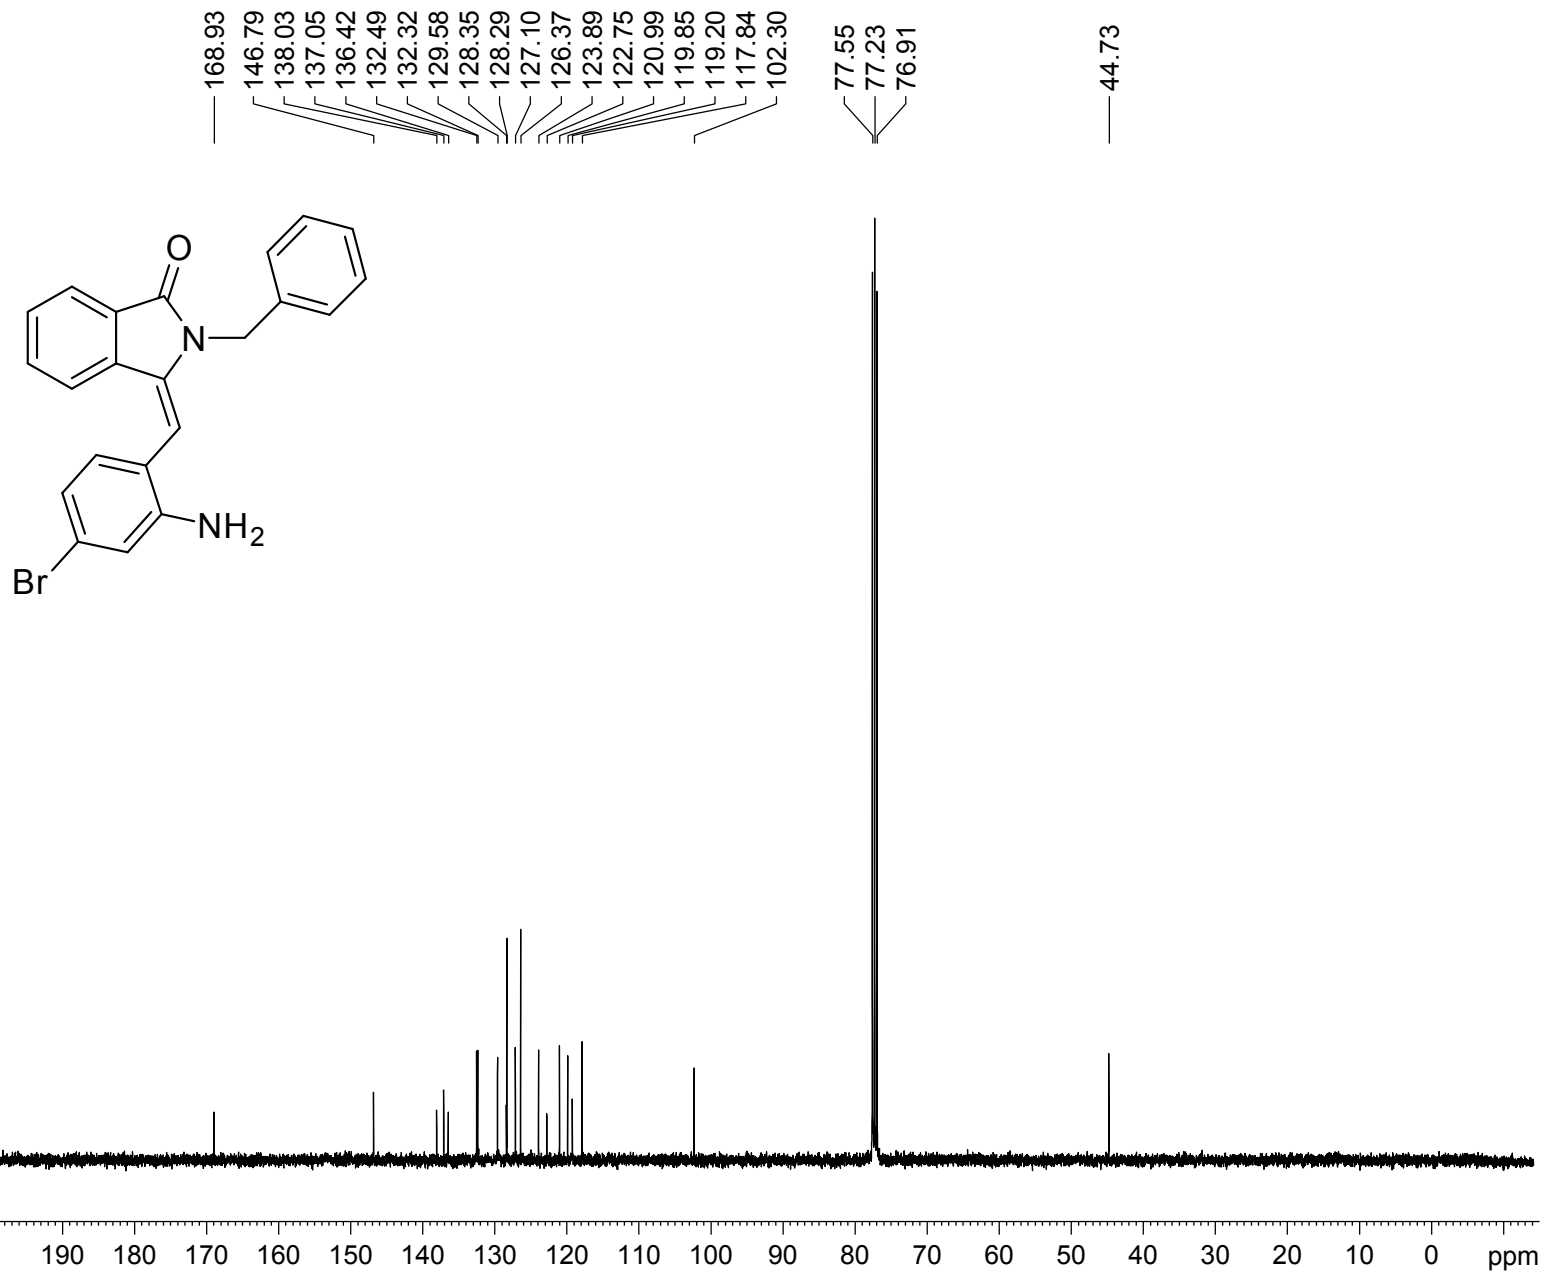

Current Data Parameters

NAME isoindolones  
EXPNO 2  
PROCNO 1

F2 - Acquisition Parameters

Date\_ 20151220  
Time 23.25  
INSTRUM spect  
PROBHD 5 mm BBO BB-1H  
PULPROG zgpg30  
TD 32768  
SOLVENT CDCl3  
NS 345  
DS 0  
SWH 24038.461 Hz  
FIDRES 0.733596 Hz  
AQ 0.6815744 sec  
RG 8192  
DW 20.800 usec  
DE 6.50 usec  
TE 297.5 K  
D1 2.00000000 sec  
D11 0.03000000 sec  
TD0 1

===== CHANNEL f1 =====

NUC1 13C  
P1 9.00 usec  
PL1 7.00 dB  
SFO1 100.6233325 MHz

===== CHANNEL f2 =====

CPDPRG[2] waltz16  
NUC2 1H  
PCPD2 90.00 usec  
PL2 1.80 dB  
PL12 17.00 dB  
PL13 20.00 dB  
SFO2 400.1316005 MHz

F2 - Processing parameters

SI 32768  
SF 100.6127485 MHz  
WDW EM  
SSB 0  
LB 1.00 Hz  
GB 0  
PC 1.00



3-(2-amino-5-chlorobenzylidene)-2-benzyl-6-bromoisindolin-1-one (4n)

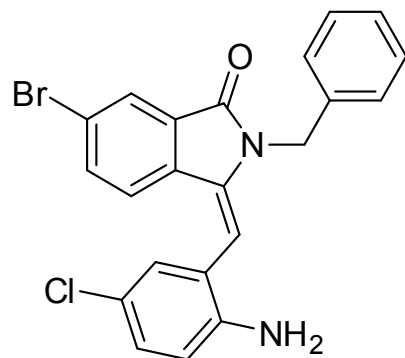

8.0693  
7.7525  
7.7321  
7.6127  
7.5923  
7.2541  
7.1171  
7.0885  
7.0705  
6.8379  
6.5208  
6.4994  
6.4752  
6.2835

4.9367

3.2459

1.5960

Current Data Parameters  
 NAME isoindolones  
 EXPNO 11  
 PROCNO 1

F2 - Acquisition Parameters  
 Date\_ 20151220  
 Time 21.57  
 INSTRUM spect  
 PROBHD 5 mm BBO BB-1H  
 PULPROG zg30  
 TD 32768  
 SOLVENT CDCl3  
 NS 32  
 DS 0  
 SWH 7246.377 Hz  
 FIDRES 0.221142 Hz  
 AQ 2.2609921 sec  
 RG 181  
 DW 69.000 usec  
 DE 6.50 usec  
 TE 297.3 K  
 D1 2.0000000 sec  
 TD0 1

===== CHANNEL f1 =====  
 NUC1 1H  
 P1 14.40 usec  
 PL1 1.80 dB  
 SFO1 400.1324008 MHz

F2 - Processing parameters  
 SI 16384  
 SF 400.1300118 MHz  
 WDW EM  
 SSB 0  
 LB 0 Hz  
 GB 0  
 PC 1.00

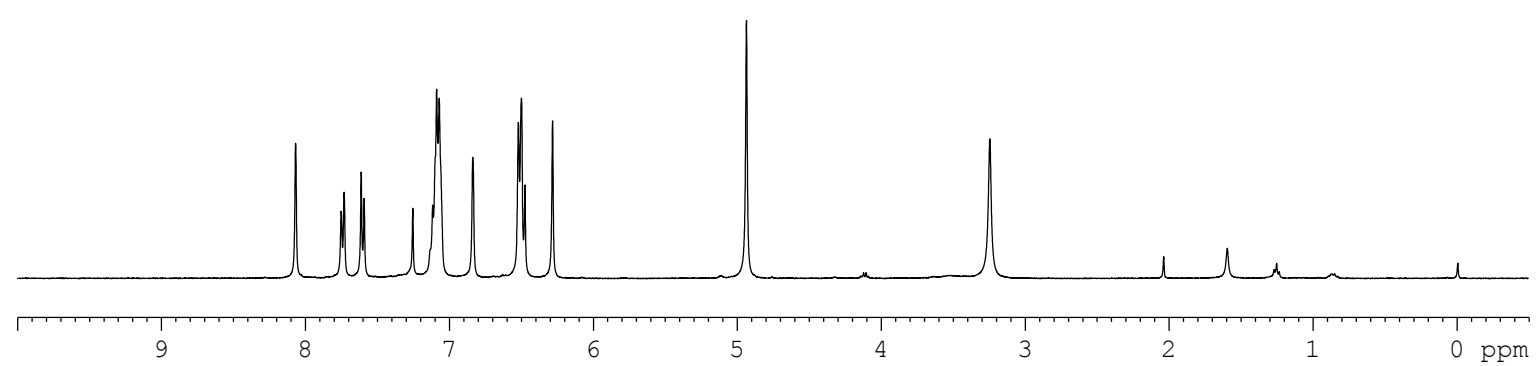

0.942  
1.004  
1.029  
3.904  
1.042  
2.932  
0.988  
2.000  
1.967

3-(2-amino-5-chlorobenzylidene)-2-benzyl-6-bromoisoindolin-1-one (4n)

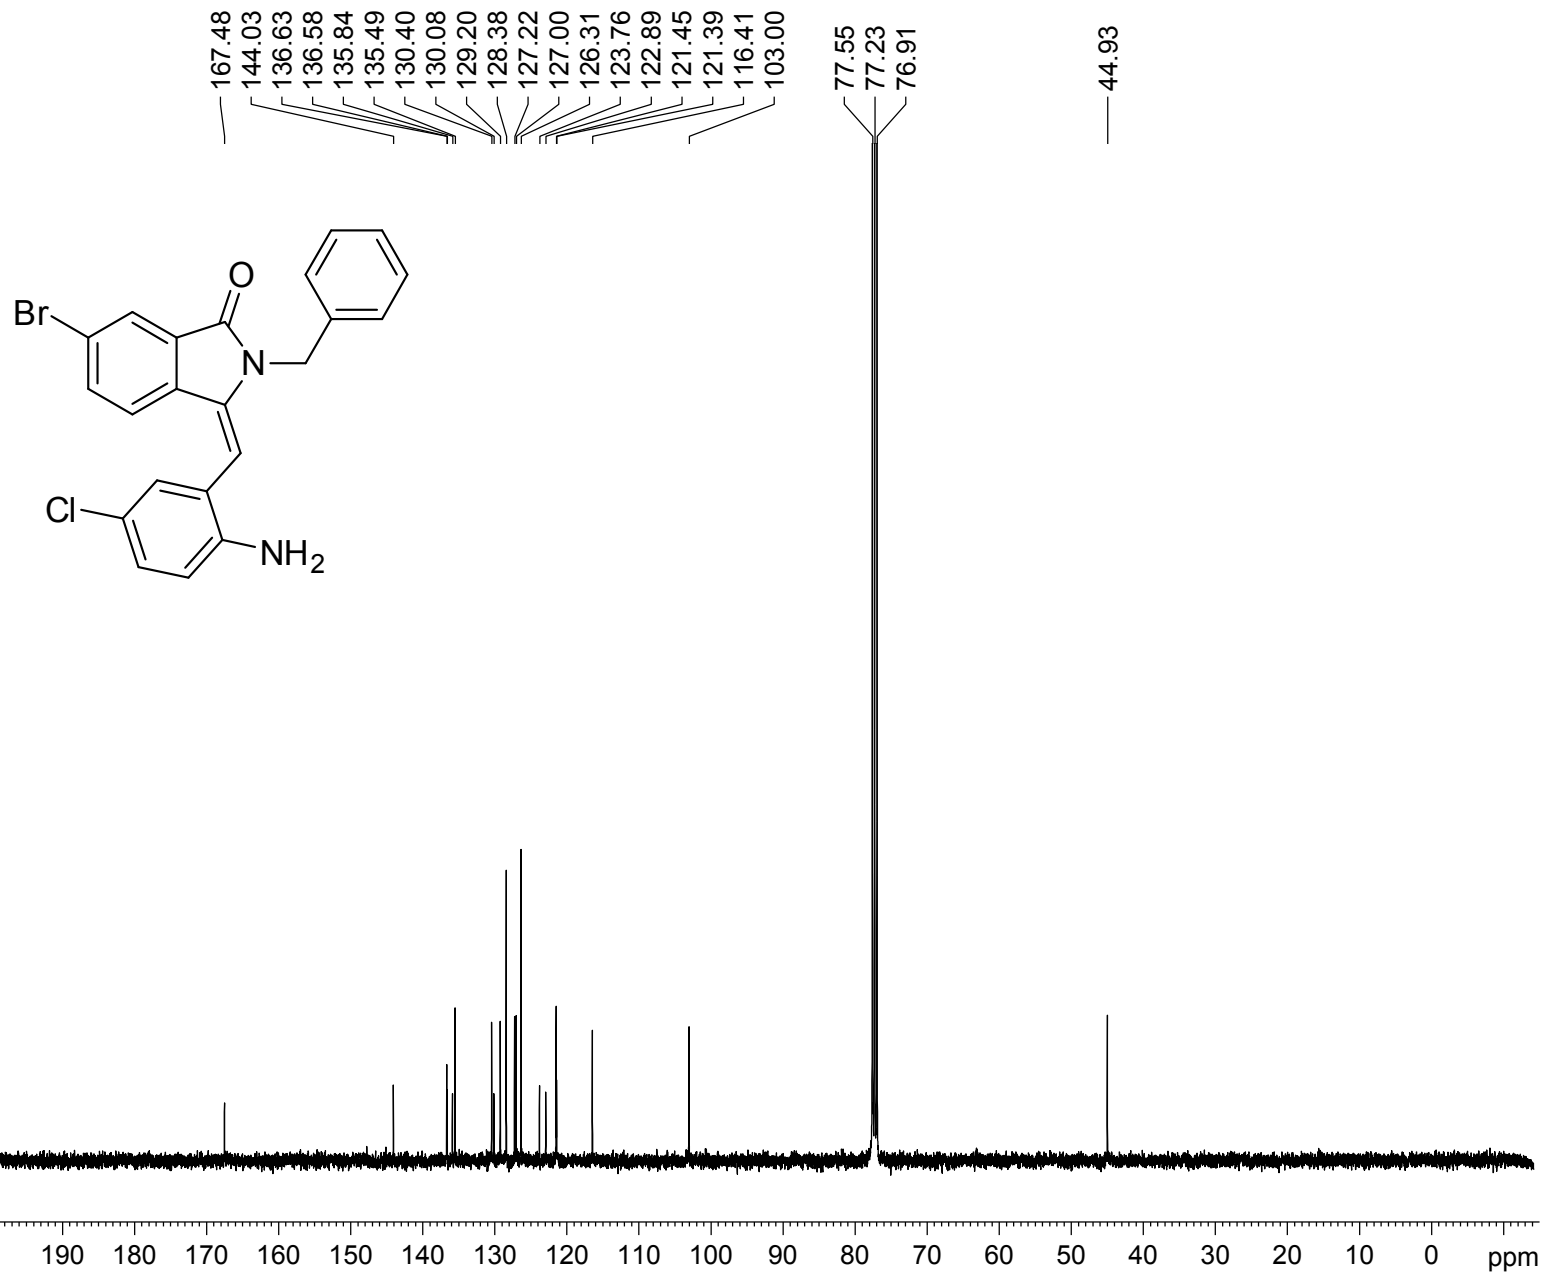

Current Data Parameters

NAME isoindolones  
EXPNO 12  
PROCNO 1

F2 - Acquisition Parameters

Date\_ 20151220  
Time 21.58  
INSTRUM spect  
PROBHD 5 mm BBO BB-1H  
PULPROG zgpg30  
TD 32768  
SOLVENT CDCl3  
NS 727  
DS 0  
SWH 24038.461 Hz  
FIDRES 0.733596 Hz  
AQ 0.6815744 sec  
RG 8192  
DW 20.800 usec  
DE 6.50 usec  
TE 297.3 K  
D1 2.00000000 sec  
D11 0.03000000 sec  
TD0 1

===== CHANNEL f1 =====

NUC1 13C  
P1 9.00 usec  
PL1 7.00 dB  
SFO1 100.6233325 MHz

===== CHANNEL f2 =====

CPDPRG[2] waltz16  
NUC2 1H  
PCPD2 90.00 usec  
PL2 1.80 dB  
PL12 17.00 dB  
PL13 20.00 dB  
SFO2 400.1316005 MHz

F2 - Processing parameters

SI 32768  
SF 100.6127485 MHz  
WDW EM  
SSB 0  
LB 1.00 Hz  
GB 0  
PC 1.00

N-methyl-2-((2-((2-methyl-3-oxoisoindolin-1-ylidene)methyl)phenyl)amino)benzamide (5a)

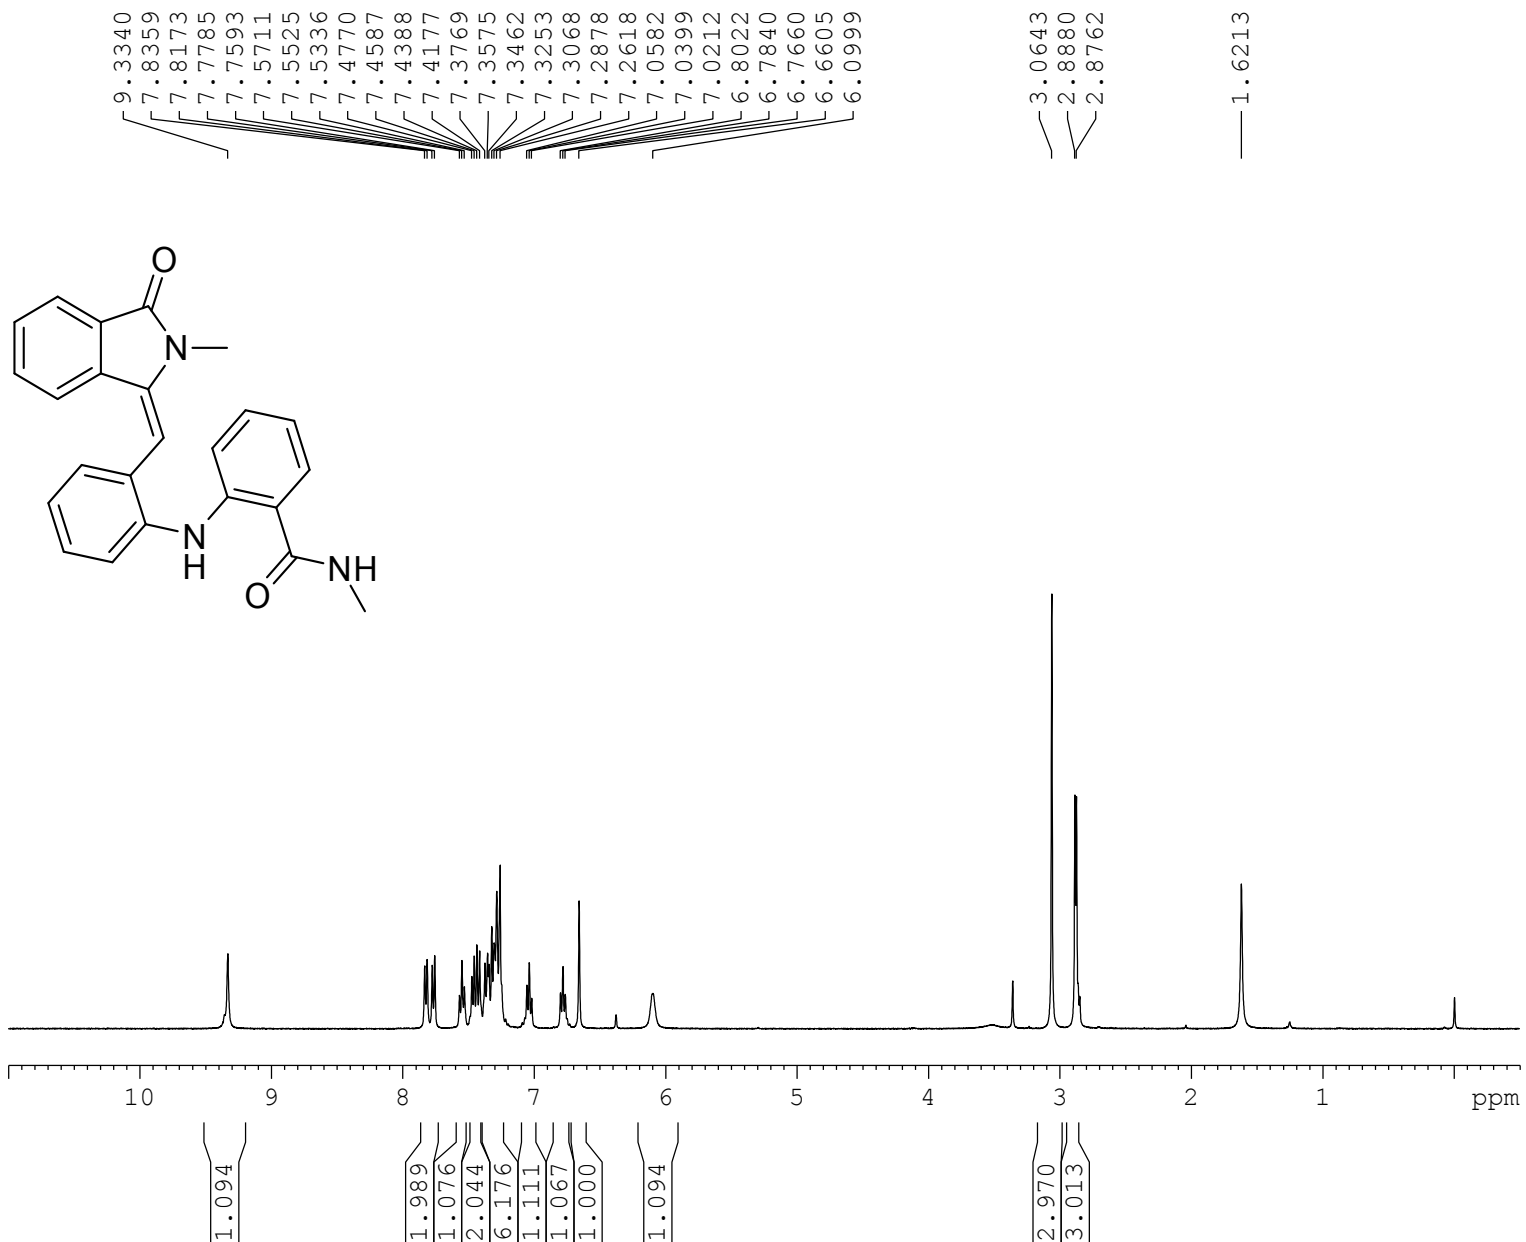

Current Data Parameters  
 NAME isoindolones  
 EXPNO 22  
 PROCNO 1

F2 - Acquisition Parameters  
 Date\_ 20160129  
 Time 20.26  
 INSTRUM spect  
 PROBHD 5 mm BBO BB-1H  
 PULPROG zg30  
 TD 32768  
 SOLVENT CDCl3  
 NS 32  
 DS 0  
 SWH 7246.377 Hz  
 FIDRES 0.221142 Hz  
 AQ 2.2609921 sec  
 RG 228.1  
 DW 69.000 usec  
 DE 6.50 usec  
 TE 297.4 K  
 D1 2.00000000 sec  
 TD0 1

===== CHANNEL f1 =====  
 NUC1 1H  
 P1 14.40 usec  
 PL1 1.80 dB  
 SFO1 400.1324008 MHz

F2 - Processing parameters  
 SI 16384  
 SF 400.1300091 MHz  
 WDW EM  
 SSB 0  
 LB 0 Hz  
 GB 0  
 PC 1.00

N-methyl-2-((2-((2-methyl-3-oxoisindolin-1-ylidene)methyl)phenyl)amino)benzamide (5a)

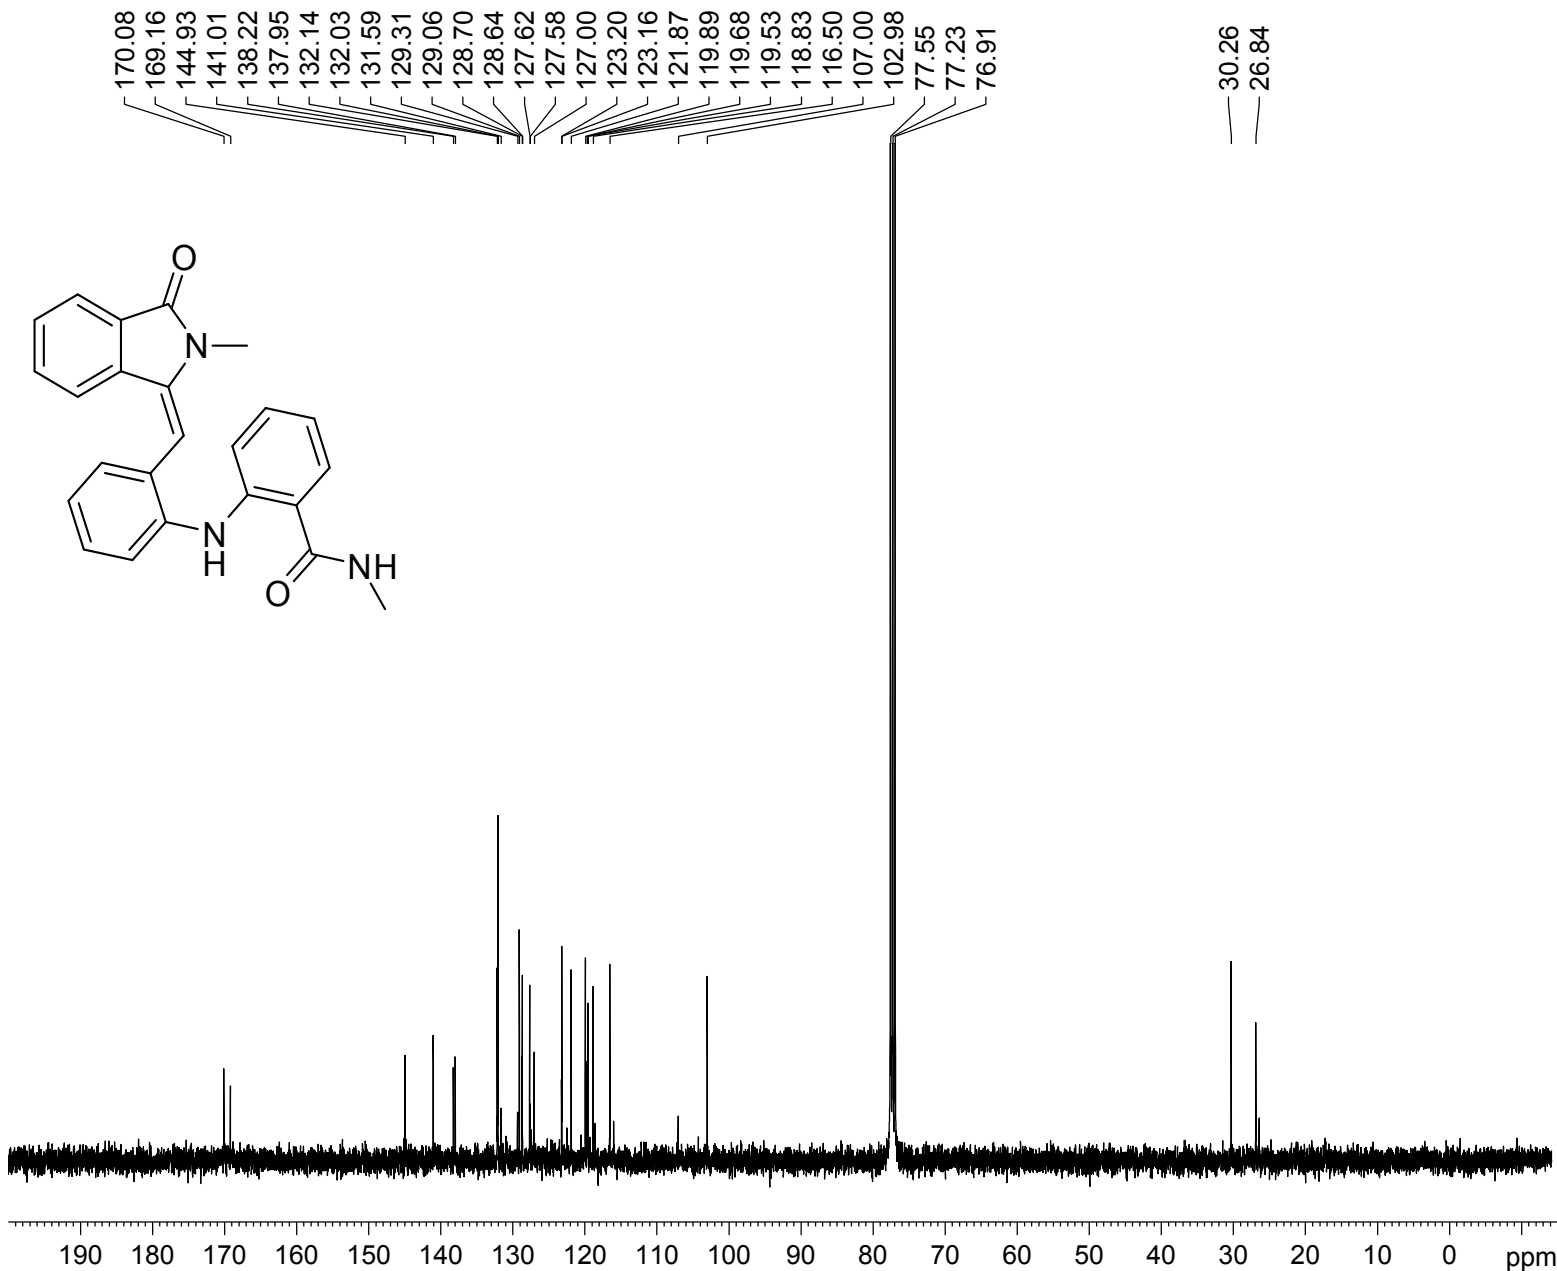

Current Data Parameters

NAME isindolones  
 EXPNO 24  
 PROCNO 1

F2 - Acquisition Parameters

Date\_ 20160201  
 Time 13.32  
 INSTRUM spect  
 PROBHD 5 mm BBO BB-1H  
 PULPROG zgpg30  
 TD 32768  
 SOLVENT CDCl3  
 NS 996  
 DS 0  
 SWH 24038.461 Hz  
 FIDRES 0.733596 Hz  
 AQ 0.6815744 sec  
 RG 8192  
 DW 20.800 usec  
 DE 6.50 usec  
 TE 297.7 K  
 D1 2.00000000 sec  
 D11 0.03000000 sec  
 TD0 1

===== CHANNEL f1 =====

NUC1 13C  
 P1 9.00 usec  
 PL1 7.00 dB  
 SFO1 100.6233325 MHz

===== CHANNEL f2 =====

CPDPRG[2] waltz16  
 NUC2 1H  
 PCPD2 90.00 usec  
 PL2 1.80 dB  
 PL12 17.00 dB  
 PL13 20.00 dB  
 SFO2 400.1316005 MHz

F2 - Processing parameters

SI 32768  
 SF 100.6127477 MHz  
 WDW EM  
 SSB 0  
 LB 1.00 Hz  
 GB 0  
 PC 1.00

1-acetyl-3-bromo-2'-methylspiro[indoline-2,1'-isoindolin]-3'-one (6a)

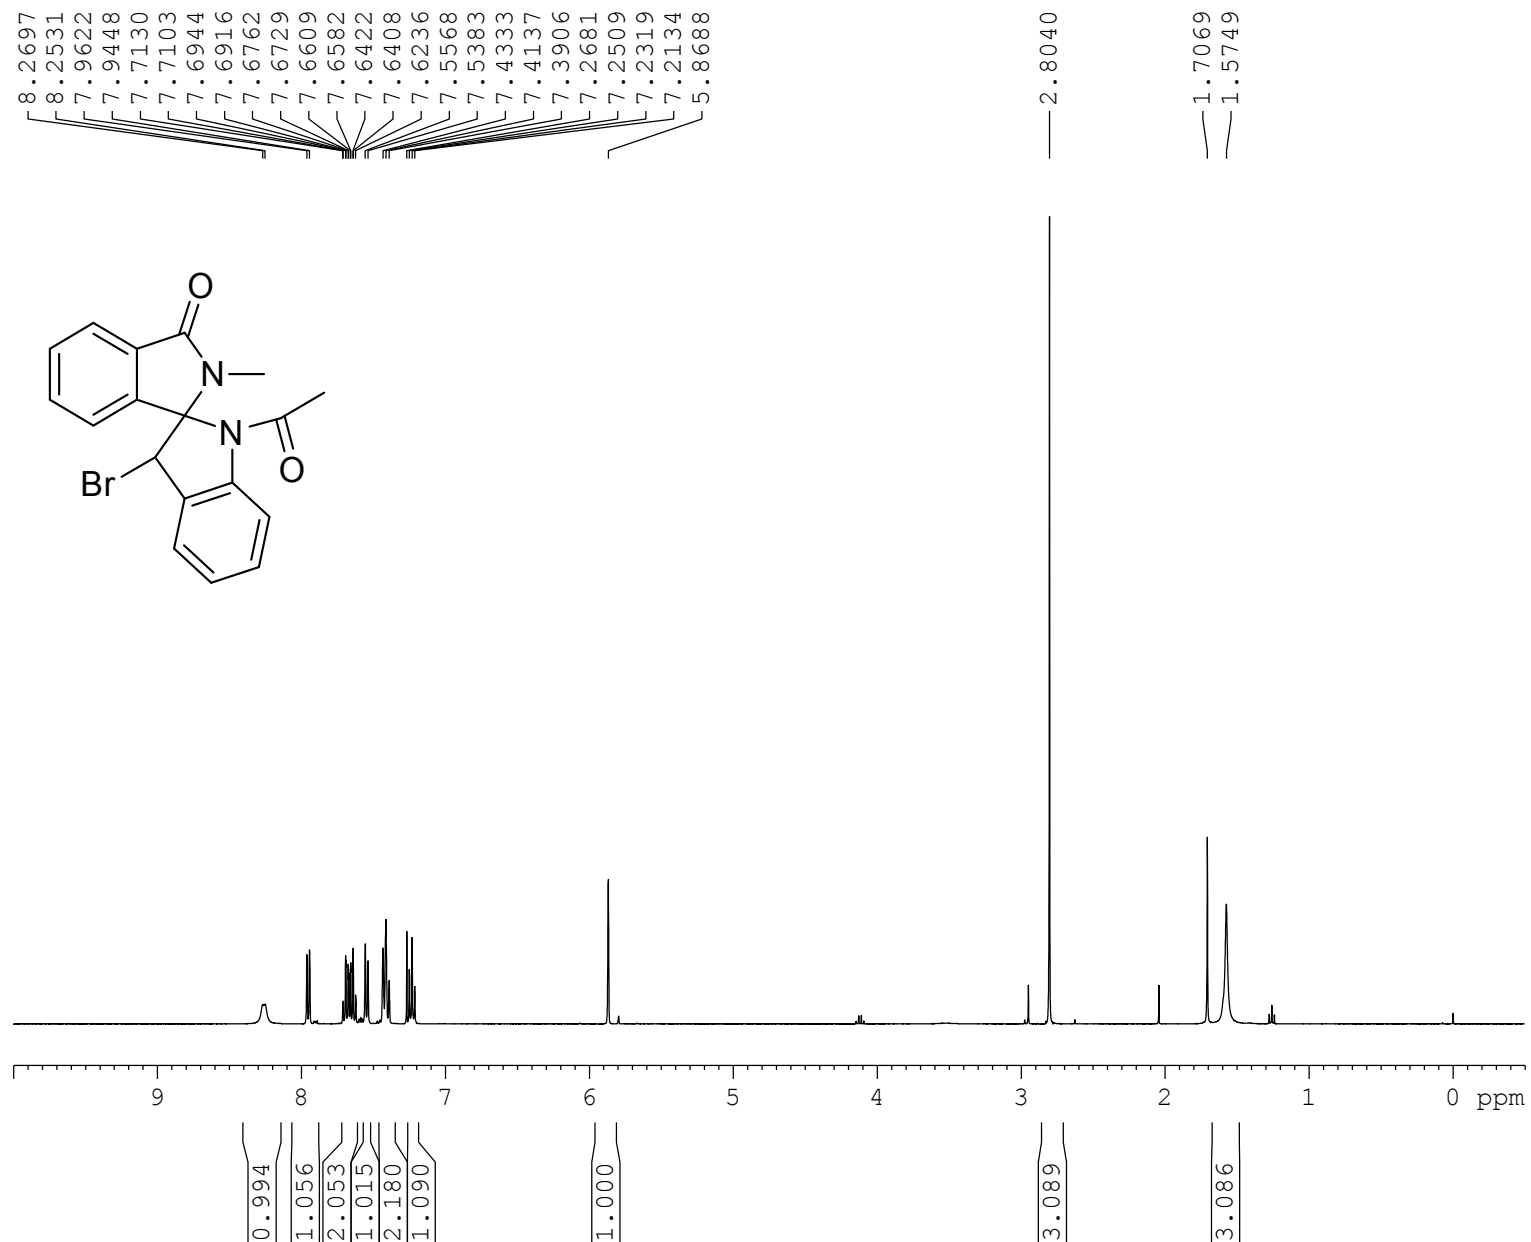

Current Data Parameters  
 NAME spiro  
 EXPNO 39  
 PROCNO 1

F2 - Acquisition Parameters  
 Date\_ 20160219  
 Time 21.19  
 INSTRUM spect  
 PROBHD 5 mm BBO BB-1H  
 PULPROG zg30  
 TD 32768  
 SOLVENT CDCl3  
 NS 32  
 DS 0  
 SWH 7246.377 Hz  
 FIDRES 0.221142 Hz  
 AQ 2.2609921 sec  
 RG 114  
 DW 69.000 usec  
 DE 6.50 usec  
 TE 297.0 K  
 D1 2.00000000 sec  
 TD0 1

===== CHANNEL f1 =====  
 NUC1 1H  
 P1 14.40 usec  
 PL1 1.80 dB  
 SFO1 400.1324008 MHz

F2 - Processing parameters  
 SI 16384  
 SF 400.1300060 MHz  
 WDW EM  
 SSB 0  
 LB 0 Hz  
 GB 0  
 PC 1.00

1-acetyl-3-bromo-2'-methylspiro[indoline-2,1'-isoindolin]-3'-one (6a)

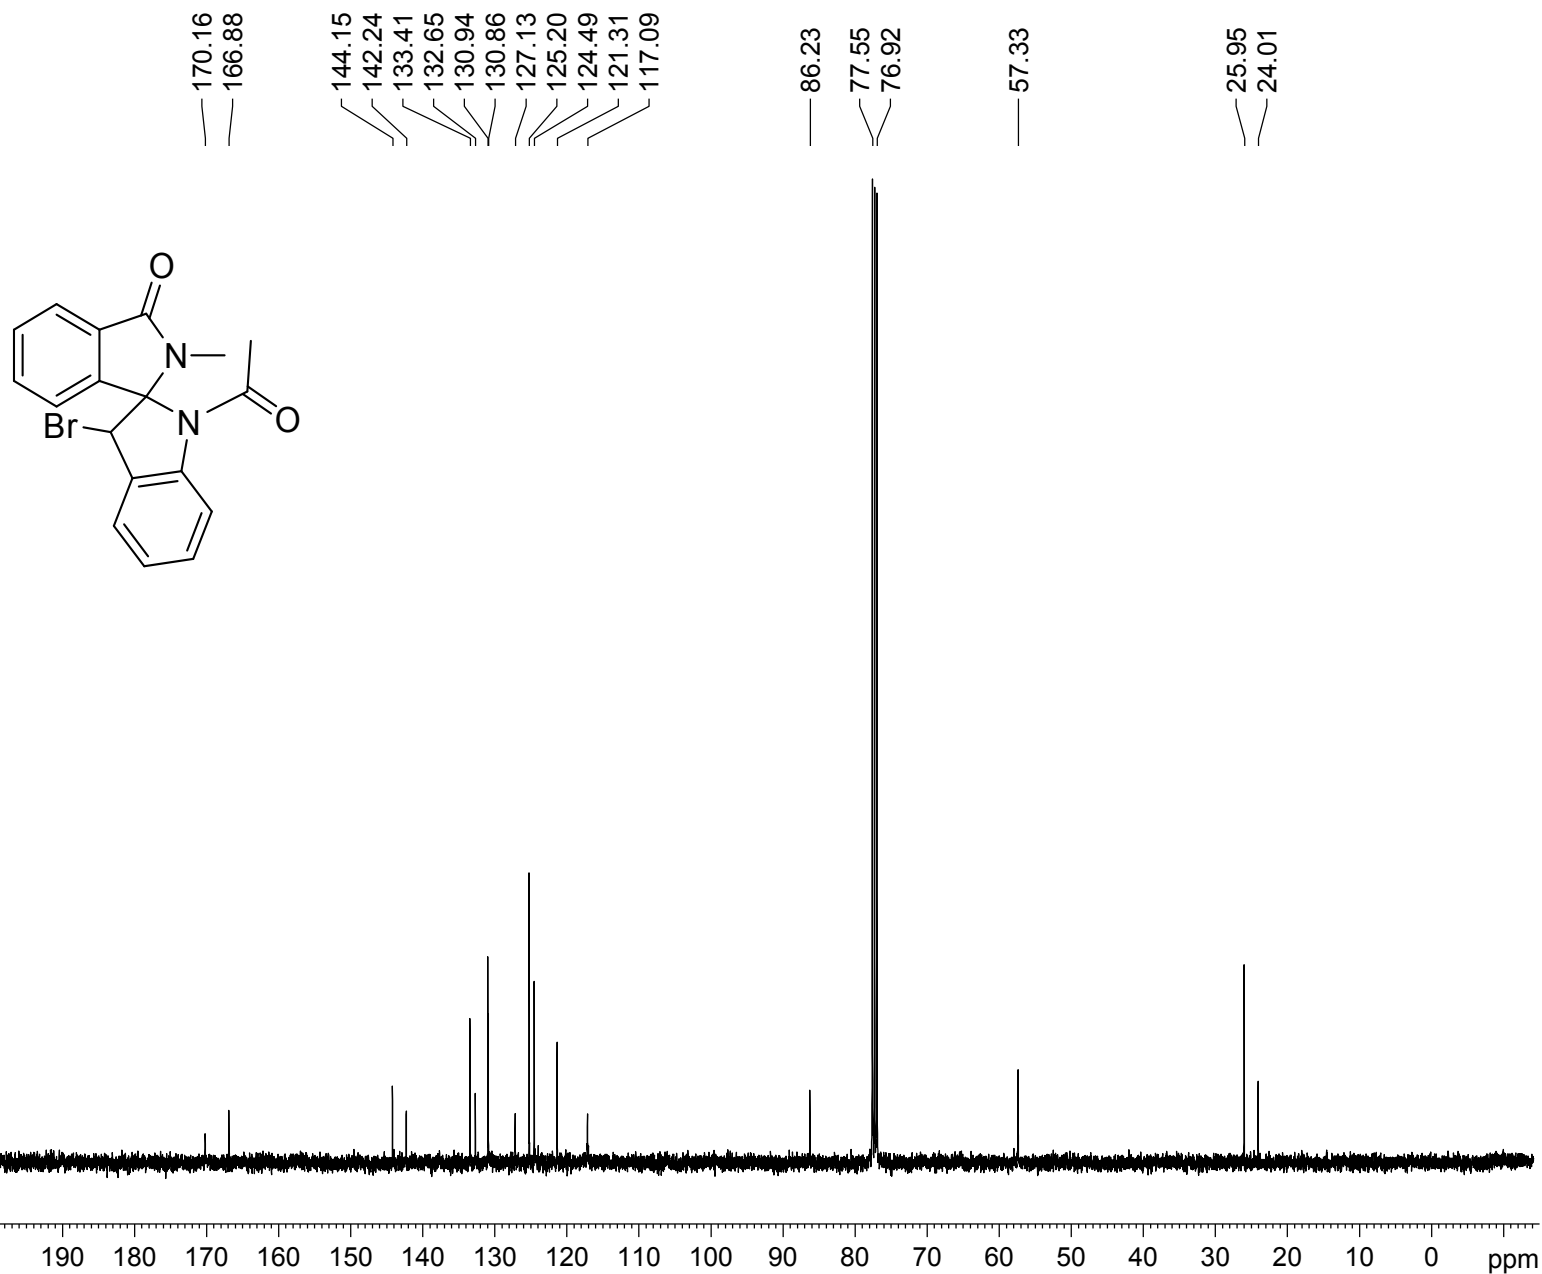

Current Data Parameters

NAME spiro  
EXPNO 40  
PROCNO 1

F2 - Acquisition Parameters

Date\_ 20160219  
Time 21.28  
INSTRUM spect  
PROBHD 5 mm BBO BB-1H  
PULPROG zgpg30  
TD 32768  
SOLVENT CDCl3  
NS 303  
DS 0  
SWH 24038.461 Hz  
FIDRES 0.733596 Hz  
AQ 0.6815744 sec  
RG 8192  
DW 20.800 usec  
DE 6.50 usec  
TE 297.2 K  
D1 2.00000000 sec  
D11 0.03000000 sec  
TD0 1

===== CHANNEL f1 =====

NUC1 13C  
P1 9.00 usec  
PL1 7.00 dB  
SFO1 100.6233325 MHz

===== CHANNEL f2 =====

CPDPRG[2] waltz16  
NUC2 1H  
PCPD2 90.00 usec  
PL2 1.80 dB  
PL12 17.00 dB  
PL13 20.00 dB  
SFO2 400.1316005 MHz

F2 - Processing parameters

SI 32768  
SF 100.6127492 MHz  
WDW EM  
SSB 0  
LB 1.00 Hz  
GB 0  
PC 1.00

1-acetyl-3,6-dibromo-2'-methylspiro[indoline-2,1'-isoindolin]-3'-one (6b)

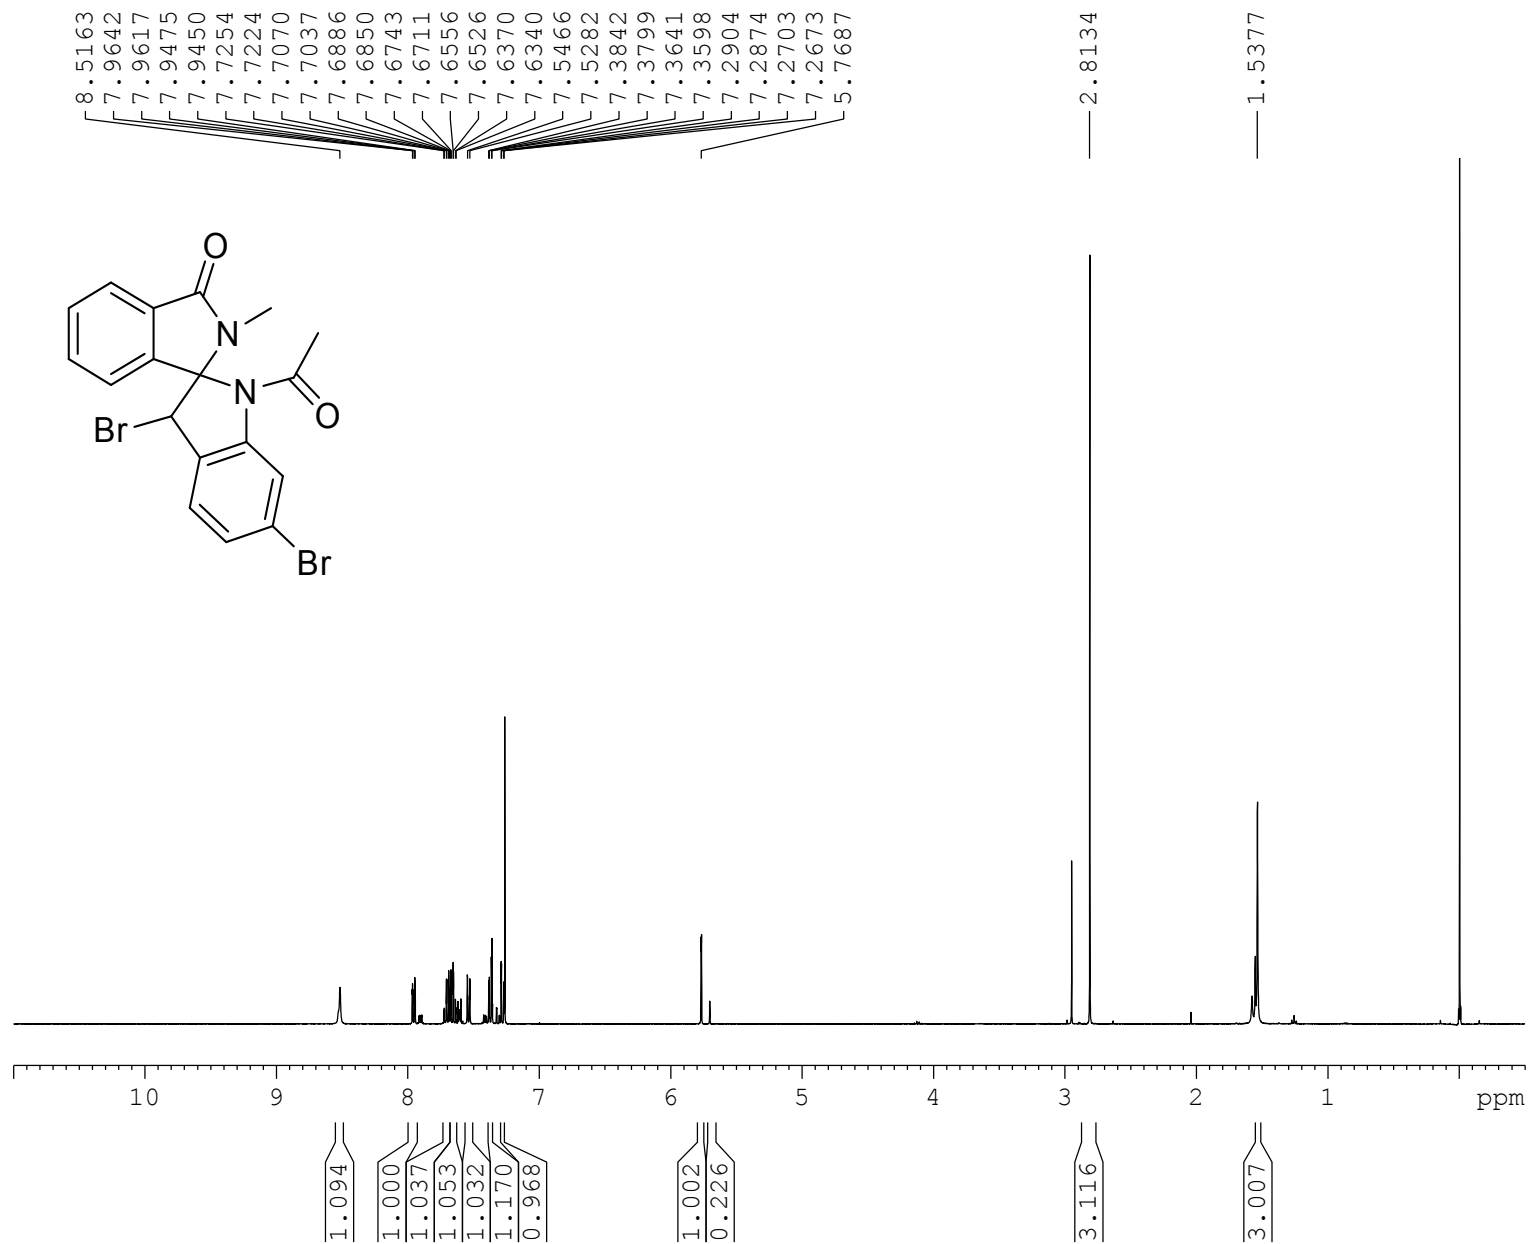

Current Data Parameters  
 NAME spiro1  
 EXPNO 15  
 PROCNO 1

F2 - Acquisition Parameters  
 Date\_ 20150904  
 Time 14.15  
 INSTRUM spect  
 PROBHD 5 mm PABBO BB/  
 PULPROG zg30  
 TD 32768  
 SOLVENT CDCl3  
 NS 16  
 DS 0  
 SWH 7211.539 Hz  
 FIDRES 0.220079 Hz  
 AQ 2.2719147 sec  
 RG 198.09  
 DW 69.333 usec  
 DE 10.50 usec  
 TE 298.4 K  
 D1 2.00000000 sec  
 TD0 1

===== CHANNEL f1 =====  
 SFO1 400.1324008 MHz  
 NUC1 1H  
 P1 12.90 usec  
 PLW1 15.00000000 W

F2 - Processing parameters  
 SI 16384  
 SF 400.1300090 MHz  
 WDW EM  
 SSB 0  
 LB 0 Hz  
 GB 0  
 PC 1.00

1-acetyl-3,6-dibromo-2'-methylspiro[indoline-2,1'-isoindolin]-3'-one (6b)

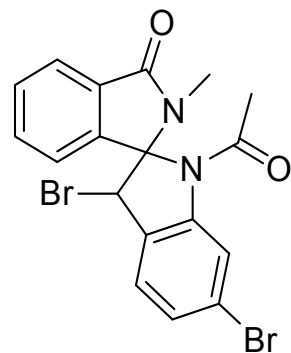

170.19  
166.68  
143.74  
143.10  
133.55  
132.49  
131.06  
128.21  
126.21  
126.16  
124.65  
124.57  
121.32  
120.33

86.50  
77.55  
77.23  
76.91

56.40

25.94  
23.84

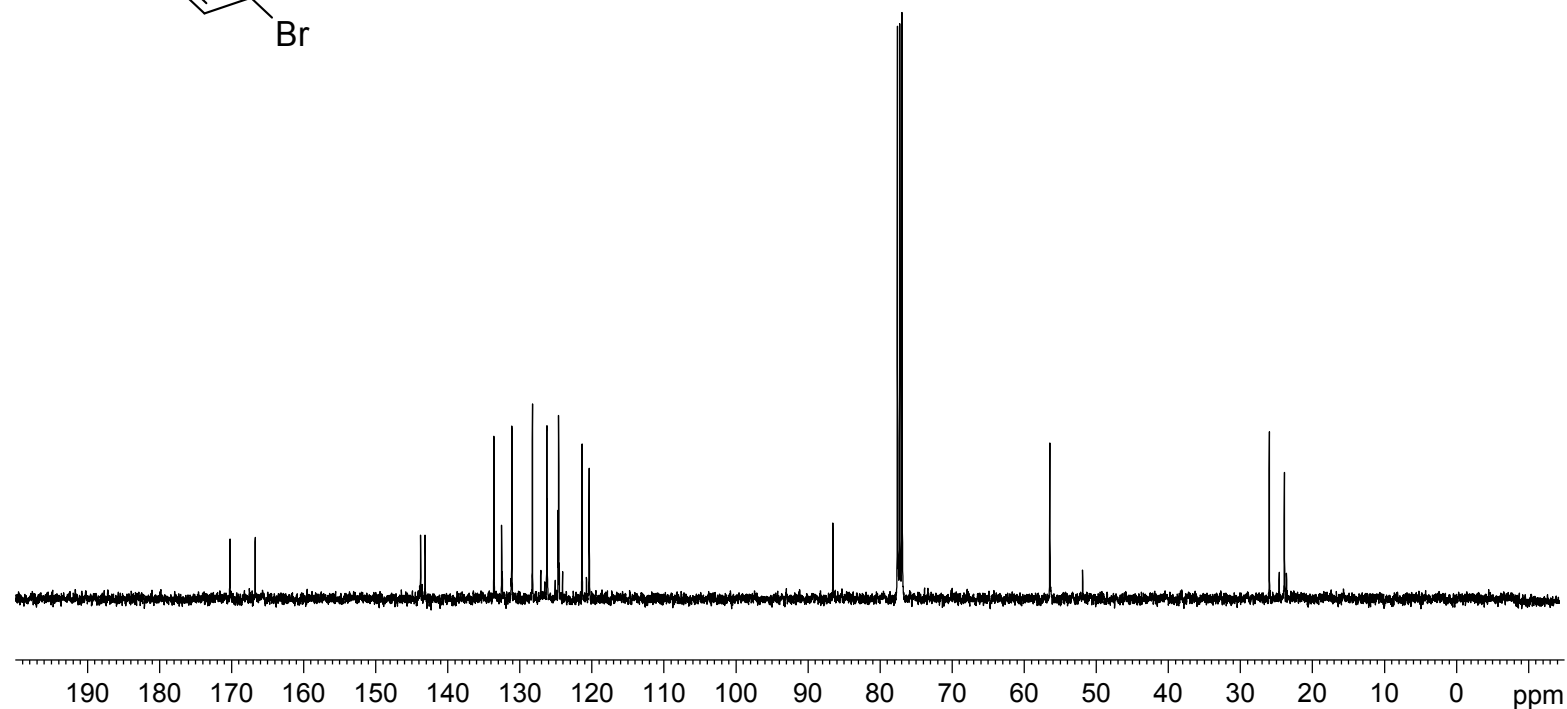

Current Data Parameters

NAME project 1  
EXPNO 69  
PROCNO 1

F2 - Acquisition Parameters

Date\_ 20150816  
Time 16.11  
INSTRUM spect  
PROBHD 5 mm PABBO BB/  
PULPROG zgpg30  
TD 32768  
SOLVENT CDCl3  
NS 137  
DS 0  
SWH 24038.461 Hz  
FIDRES 0.733596 Hz  
AQ 0.6815744 sec  
RG 198.09  
DW 20.800 usec  
DE 6.50 usec  
TE 299.2 K  
D1 2.0000000 sec  
D11 0.03000000 sec  
TD0 1

===== CHANNEL f1 =====

SFO1 100.6233319 MHz  
NUC1 13C  
P1 10.00 usec  
PLW1 47.50000000 W

===== CHANNEL f2 =====

SFO2 400.1316005 MHz  
NUC2 1H  
CPDPRG[2] waltz16  
PCPD2 90.00 usec  
PLW2 15.00000000 W  
PLW12 0.33750001 W  
PLW13 0.27338001 W

F2 - Processing parameters

SI 32768  
SF 100.6127516 MHz  
WDW EM  
SSB 0  
LB 2.00 Hz  
GB 0  
PC 1.00



1-acetyl-3-bromo-5-chloro-2'-methylspiro[indoline-2,1'-isoindolin]-3'-one (6c)

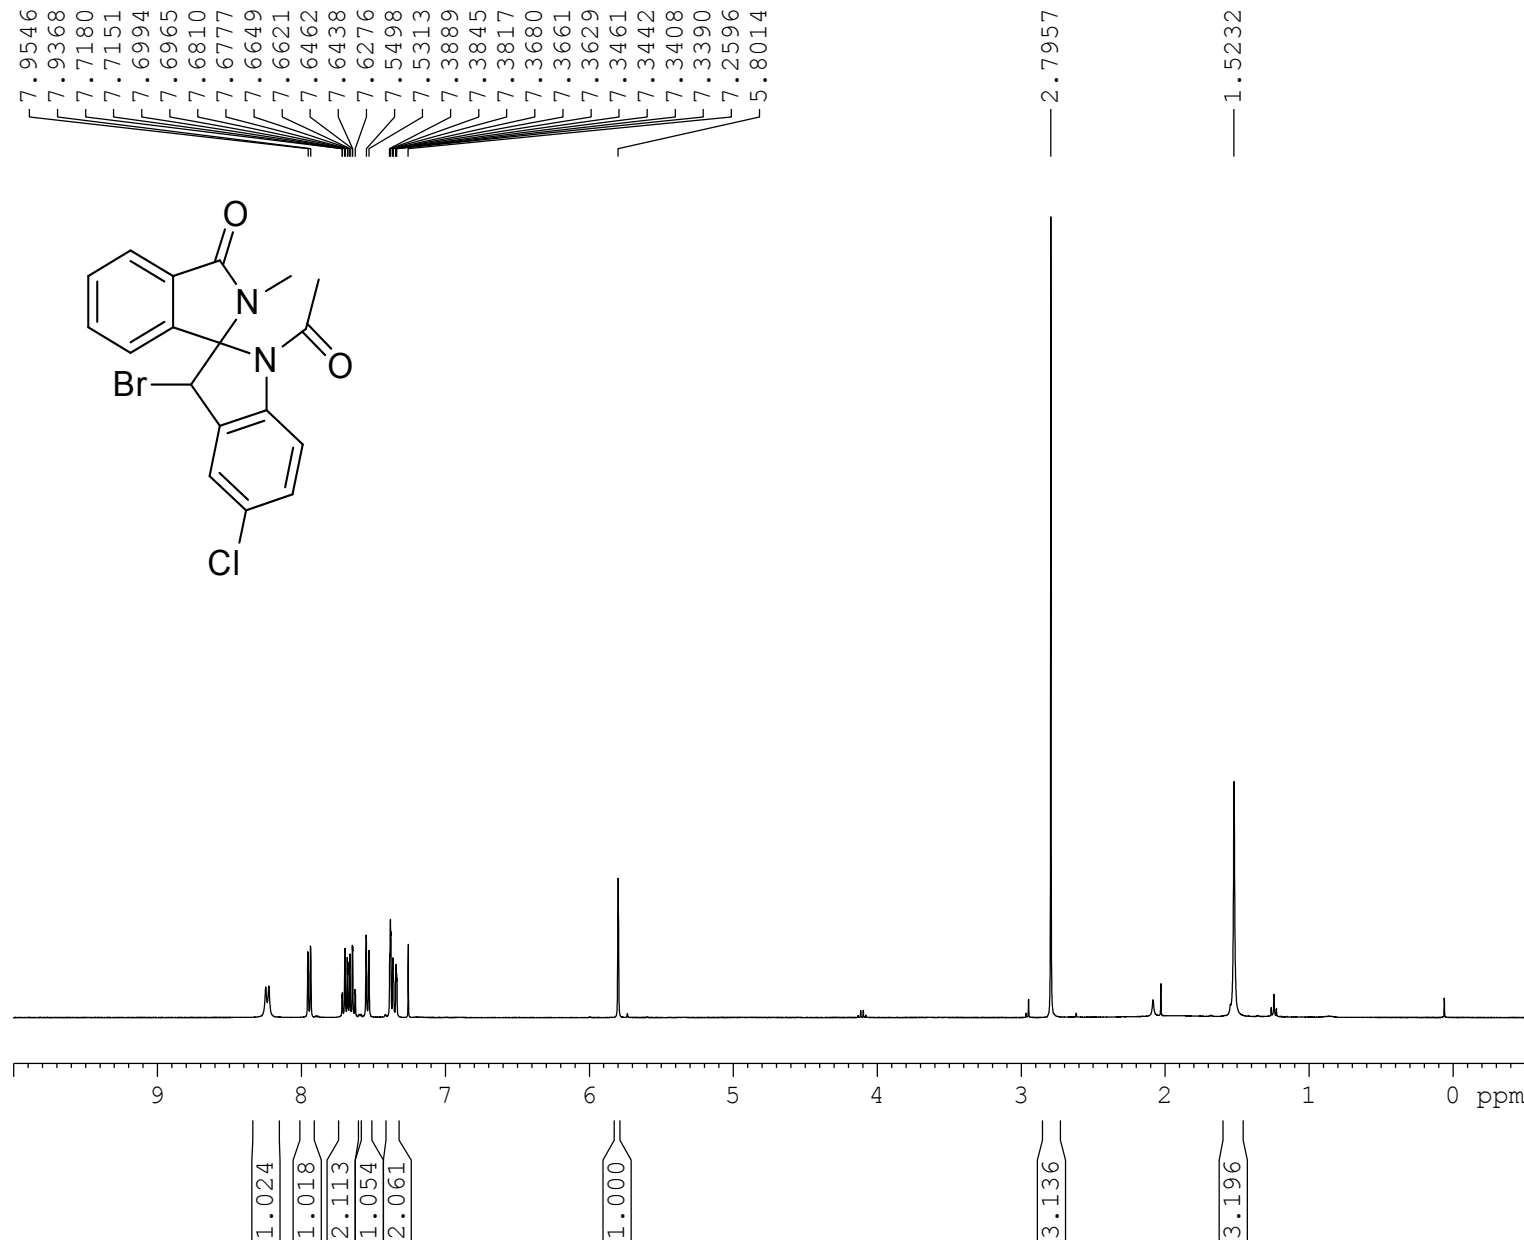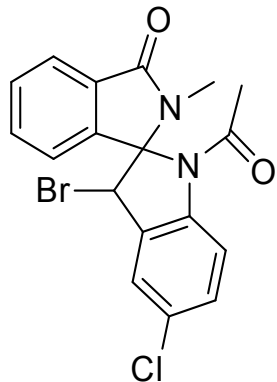

Current Data Parameters  
NAME project 1  
EXPNO 98  
PROCNO 1

F2 - Acquisition Parameters  
Date\_ 20150830  
Time 19.06  
INSTRUM spect  
PROBHD 5 mm PABBO BB/  
PULPROG zg30  
TD 32768  
SOLVENT CDCl3  
NS 16  
DS 0  
SWH 7211.539 Hz  
FIDRES 0.220079 Hz  
AQ 2.2719147 sec  
RG 89.08  
DW 69.333 usec  
DE 10.50 usec  
TE 298.2 K  
D1 2.00000000 sec  
TD0 1

===== CHANNEL f1 =====  
SFO1 400.1324008 MHz  
NUC1 1H  
P1 12.90 usec  
PLW1 15.00000000 W

F2 - Processing parameters  
SI 16384  
SF 400.1300099 MHz  
WDW EM  
SSB 0  
LB 0 Hz  
GB 0  
PC 1.00

1-acetyl-3-bromo-5-chloro-2'-methylspiro[indoline-2,1'-isoindolin]-3'-one (6c)

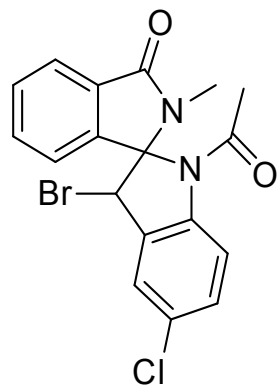

170.16  
166.75

143.75  
140.85  
133.57  
132.53  
131.09  
130.88  
130.27  
128.95  
125.24  
124.63  
121.34  
118.35

86.43  
77.55  
77.23  
76.91

56.08

25.94  
23.83

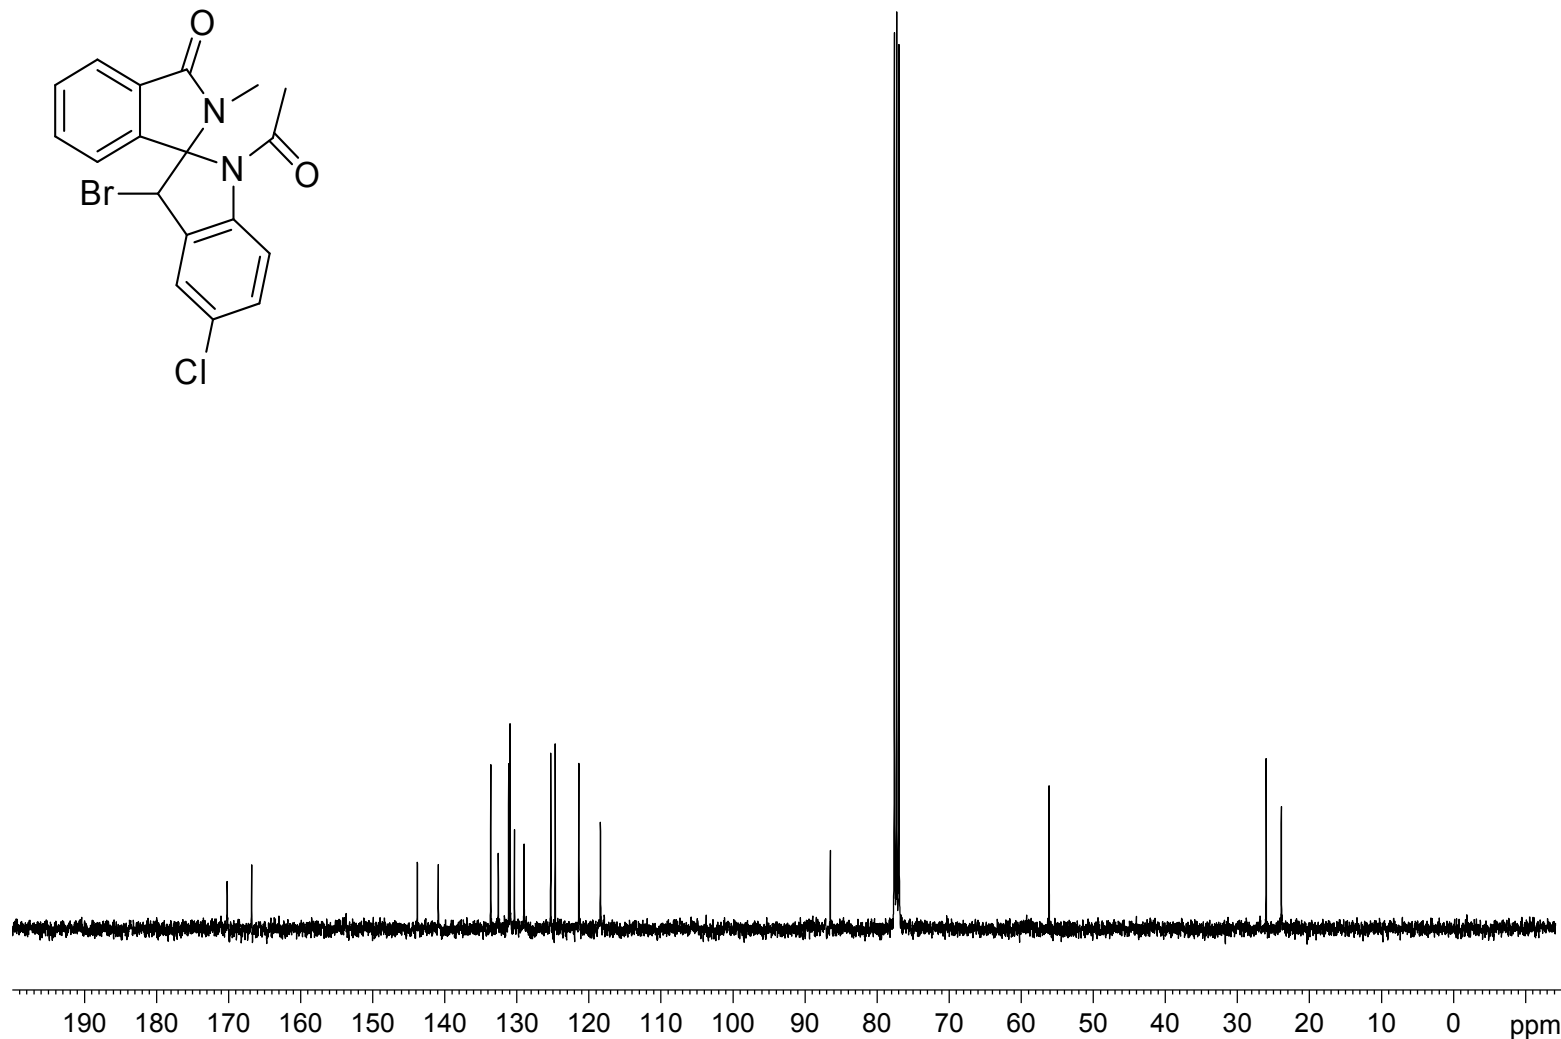

Current Data Parameters

NAME project 1  
EXPNO 100  
PROCNO 1

F2 - Acquisition Parameters

Date\_ 20150830  
Time 19.14  
INSTRUM spect  
PROBHD 5 mm PABBO BB/  
PULPROG zgpg30  
TD 32768  
SOLVENT CDCl3  
NS 150  
DS 0  
SWH 24038.461 Hz  
FIDRES 0.733596 Hz  
AQ 0.6815744 sec  
RG 198.09  
DW 20.800 usec  
DE 6.50 usec  
TE 298.2 K  
D1 2.00000000 sec  
D11 0.03000000 sec  
TD0 1

===== CHANNEL f1 =====

SFO1 100.6233319 MHz  
NUC1 13C  
P1 10.00 usec  
PLW1 47.50000000 W

===== CHANNEL f2 =====

SFO2 400.1316005 MHz  
NUC2 1H  
CPDPRG[2] waltz16  
PCPD2 90.00 usec  
PLW2 15.00000000 W  
PLW12 0.33750001 W  
PLW13 0.27338001 W

F2 - Processing parameters

SI 32768  
SF 100.6127494 MHz  
WDW EM  
SSB 0  
LB 2.00 Hz  
GB 0  
PC 1.00

1-acetyl-3-bromo-5-chloro-2'-ethylspiro[indoline-2,1'-isoindolin]-3'-one (6d)

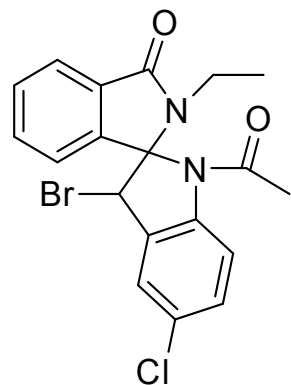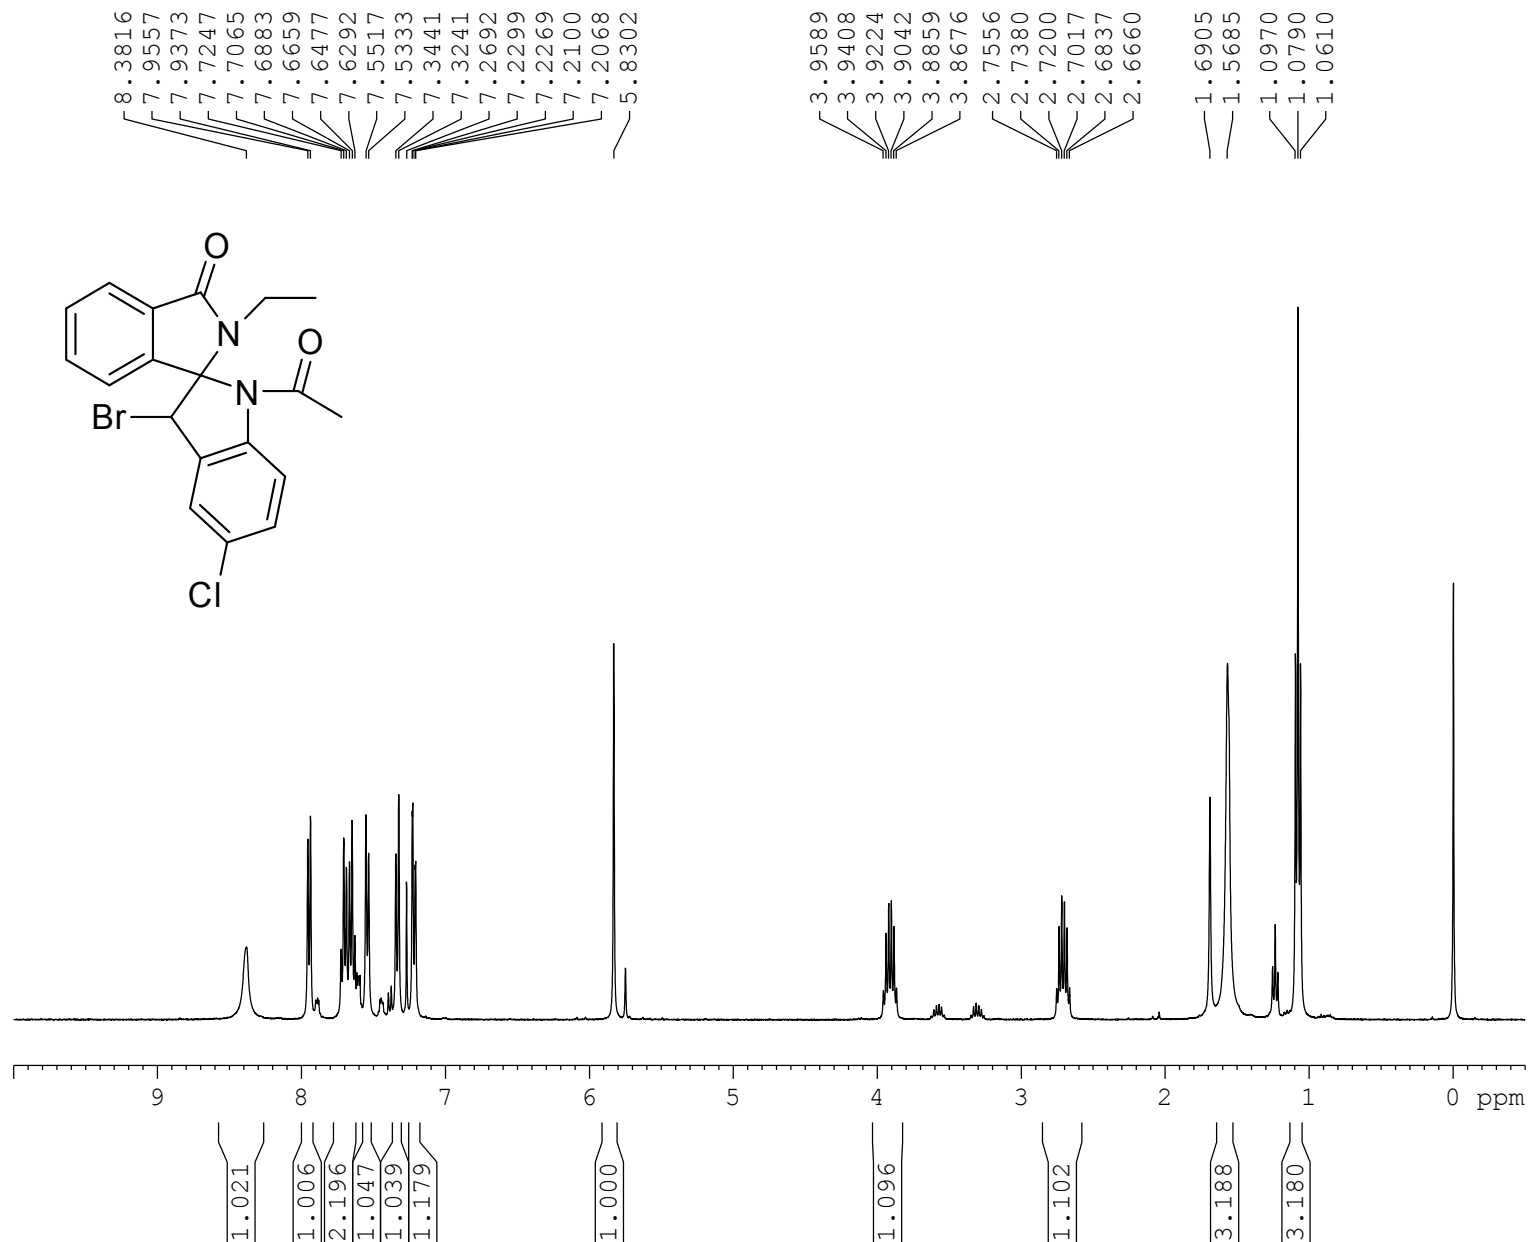

Current Data Parameters  
 NAME spiro1  
 EXPNO 8  
 PROCNO 1

F2 - Acquisition Parameters  
 Date\_ 20150903  
 Time 7.41  
 INSTRUM spect  
 PROBHD 5 mm PABBO BB/  
 PULPROG zg30  
 TD 32768  
 SOLVENT CDCl3  
 NS 16  
 DS 0  
 SWH 7211.539 Hz  
 FIDRES 0.220079 Hz  
 AQ 2.2719147 sec  
 RG 89.08  
 DW 69.333 usec  
 DE 10.50 usec  
 TE 297.7 K  
 D1 2.00000000 sec  
 TD0 1

===== CHANNEL f1 =====  
 SFO1 400.1324008 MHz  
 NUC1 1H  
 P1 12.90 usec  
 PLW1 15.00000000 W

F2 - Processing parameters  
 SI 16384  
 SF 400.1300063 MHz  
 WDW EM  
 SSB 0  
 LB 0 Hz  
 GB 0  
 PC 1.00

1-acetyl-3-bromo-5-chloro-2'-ethylspiro[indoline-2,1'-isoindolin]-3'-one (6d)

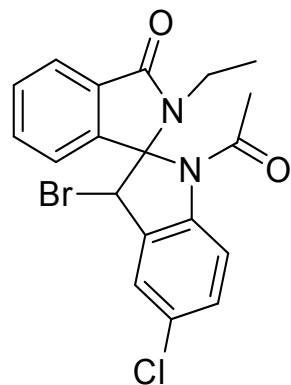

170.25  
166.76  
144.01  
143.08  
136.66  
133.56  
132.57  
131.03  
125.92  
125.70  
125.31  
124.61  
121.22  
117.79  
87.26  
77.54  
77.23  
76.91  
56.91  
36.56  
24.18  
13.94

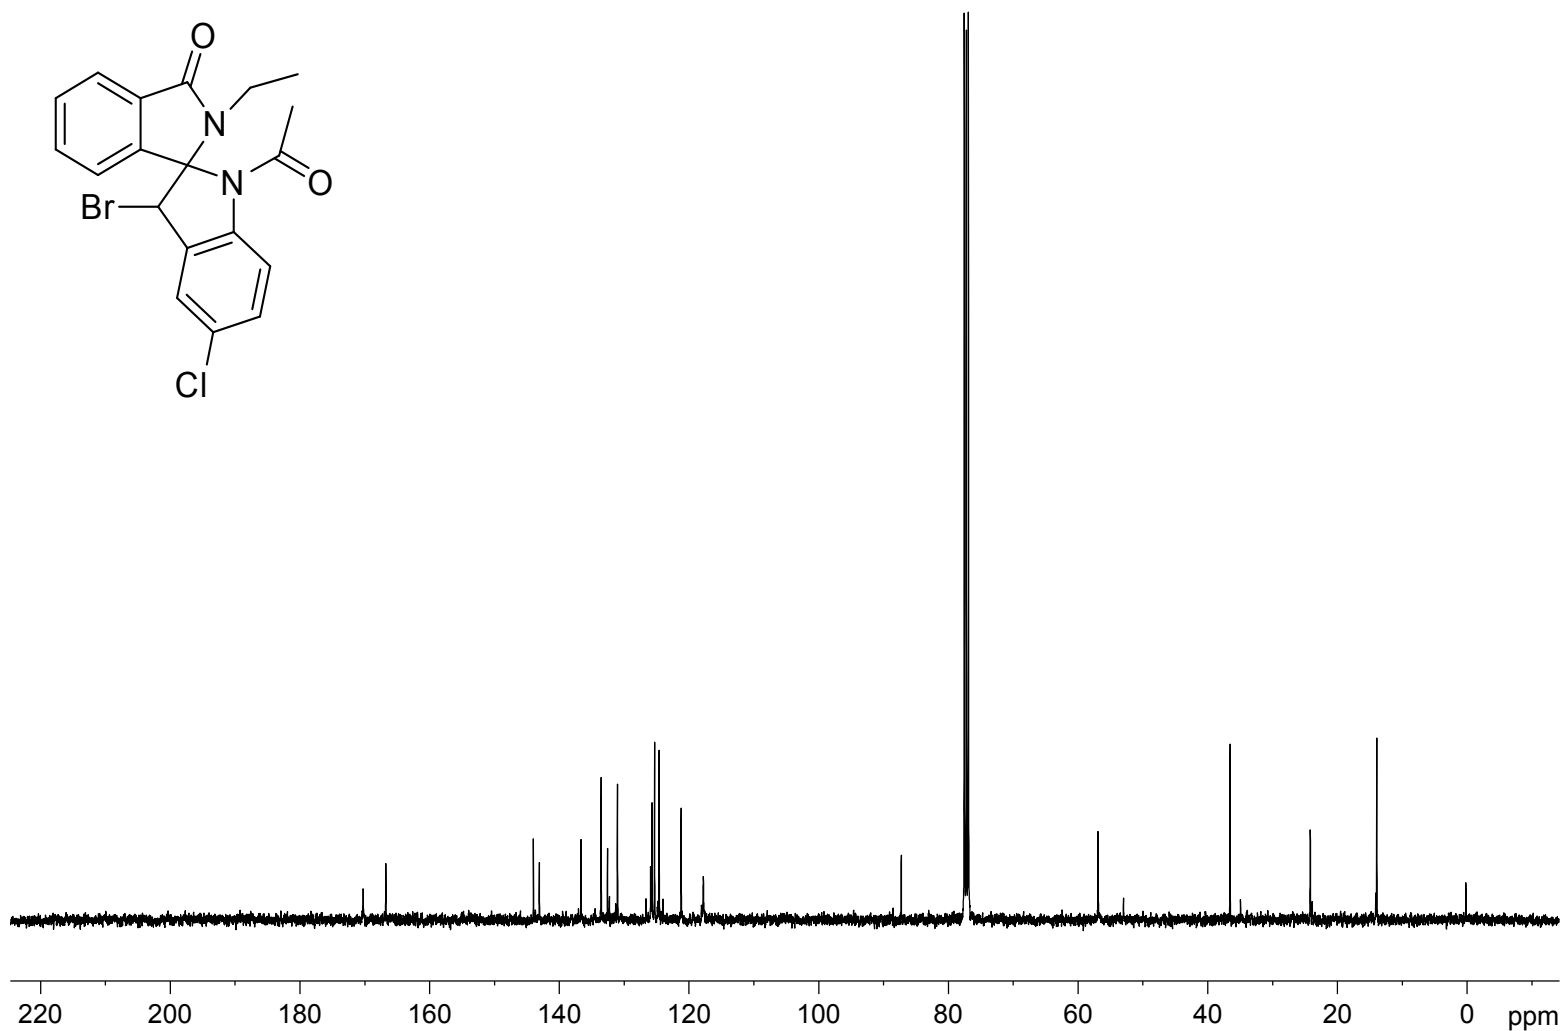

Current Data Parameters

NAME spiro1  
EXPNO 9  
PROCNO 1

F2 - Acquisition Parameters

Date\_ 20150903  
Time 7.43  
INSTRUM spect  
PROBHD 5 mm PABBO BB/  
PULPROG zgpg30  
TD 32768  
SOLVENT CDCl3  
NS 500  
DS 0  
SWH 24038.461 Hz  
FIDRES 0.733596 Hz  
AQ 0.6815744 sec  
RG 198.09  
DW 20.800 usec  
DE 6.50 usec  
TE 297.7 K  
D1 2.00000000 sec  
D11 0.03000000 sec  
TD0 1

===== CHANNEL f1 =====

SFO1 100.6233319 MHz  
NUC1 13C  
P1 10.00 usec  
PLW1 47.50000000 W

===== CHANNEL f2 =====

SFO2 400.1316005 MHz  
NUC2 1H  
CPDPRG[2] waltz16  
PCPD2 90.00 usec  
PLW2 15.00000000 W  
PLW12 0.33750001 W  
PLW13 0.27338001 W

F2 - Processing parameters

SI 32768  
SF 100.6127486 MHz  
WDW EM  
SSB 0  
LB 2.00 Hz  
GB 0  
PC 1.00

1-acetyl-3-bromo-5-chloro-2'-(2-methoxyethyl) spiro[indoline-2,1'-isoindolin]-3'-one (6e)

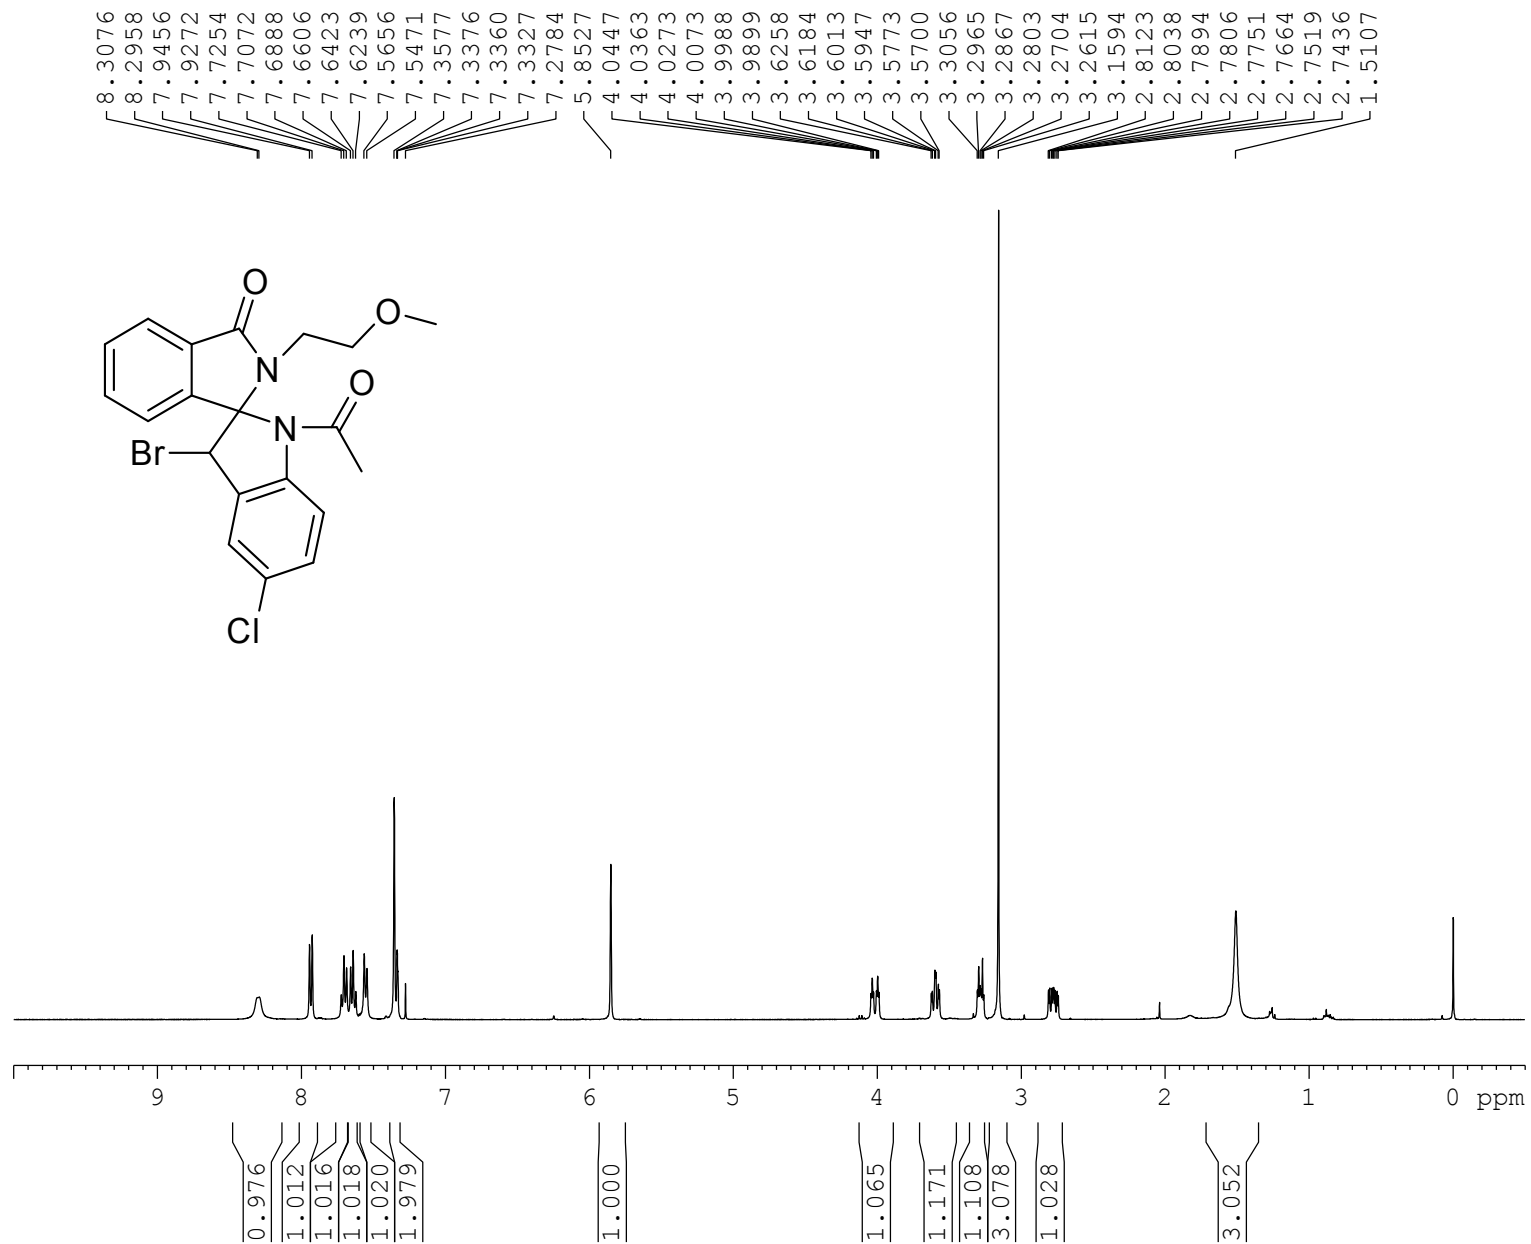

Current Data Parameters  
 NAME spiro  
 EXPNO 24  
 PROCNO 1

F2 - Acquisition Parameters  
 Date\_ 20150922  
 Time 17.04  
 INSTRUM spect  
 PROBHD 5 mm BBO BB-1H  
 PULPROG zg30  
 TD 32768  
 SOLVENT CDCl3  
 NS 32  
 DS 0  
 SWH 7246.377 Hz  
 FIDRES 0.221142 Hz  
 AQ 2.2609921 sec  
 RG 71.8  
 DW 69.000 usec  
 DE 6.50 usec  
 TE 298.4 K  
 D1 2.00000000 sec  
 TD0 1

===== CHANNEL f1 =====  
 NUC1 1H  
 P1 14.40 usec  
 PL1 1.00 dB  
 SFO1 400.1324008 MHz

F2 - Processing parameters  
 SI 16384  
 SF 400.1300019 MHz  
 WDW EM  
 SSB 0  
 LB 0 Hz  
 GB 0  
 PC 1.00

1-acetyl-3-bromo-5-chloro-2'-(2-methoxyethyl)spiro[indoline-2,1'-isoindolin]-3'-one (6e)

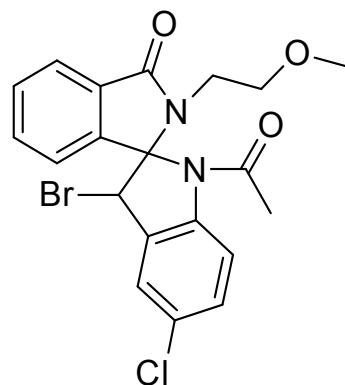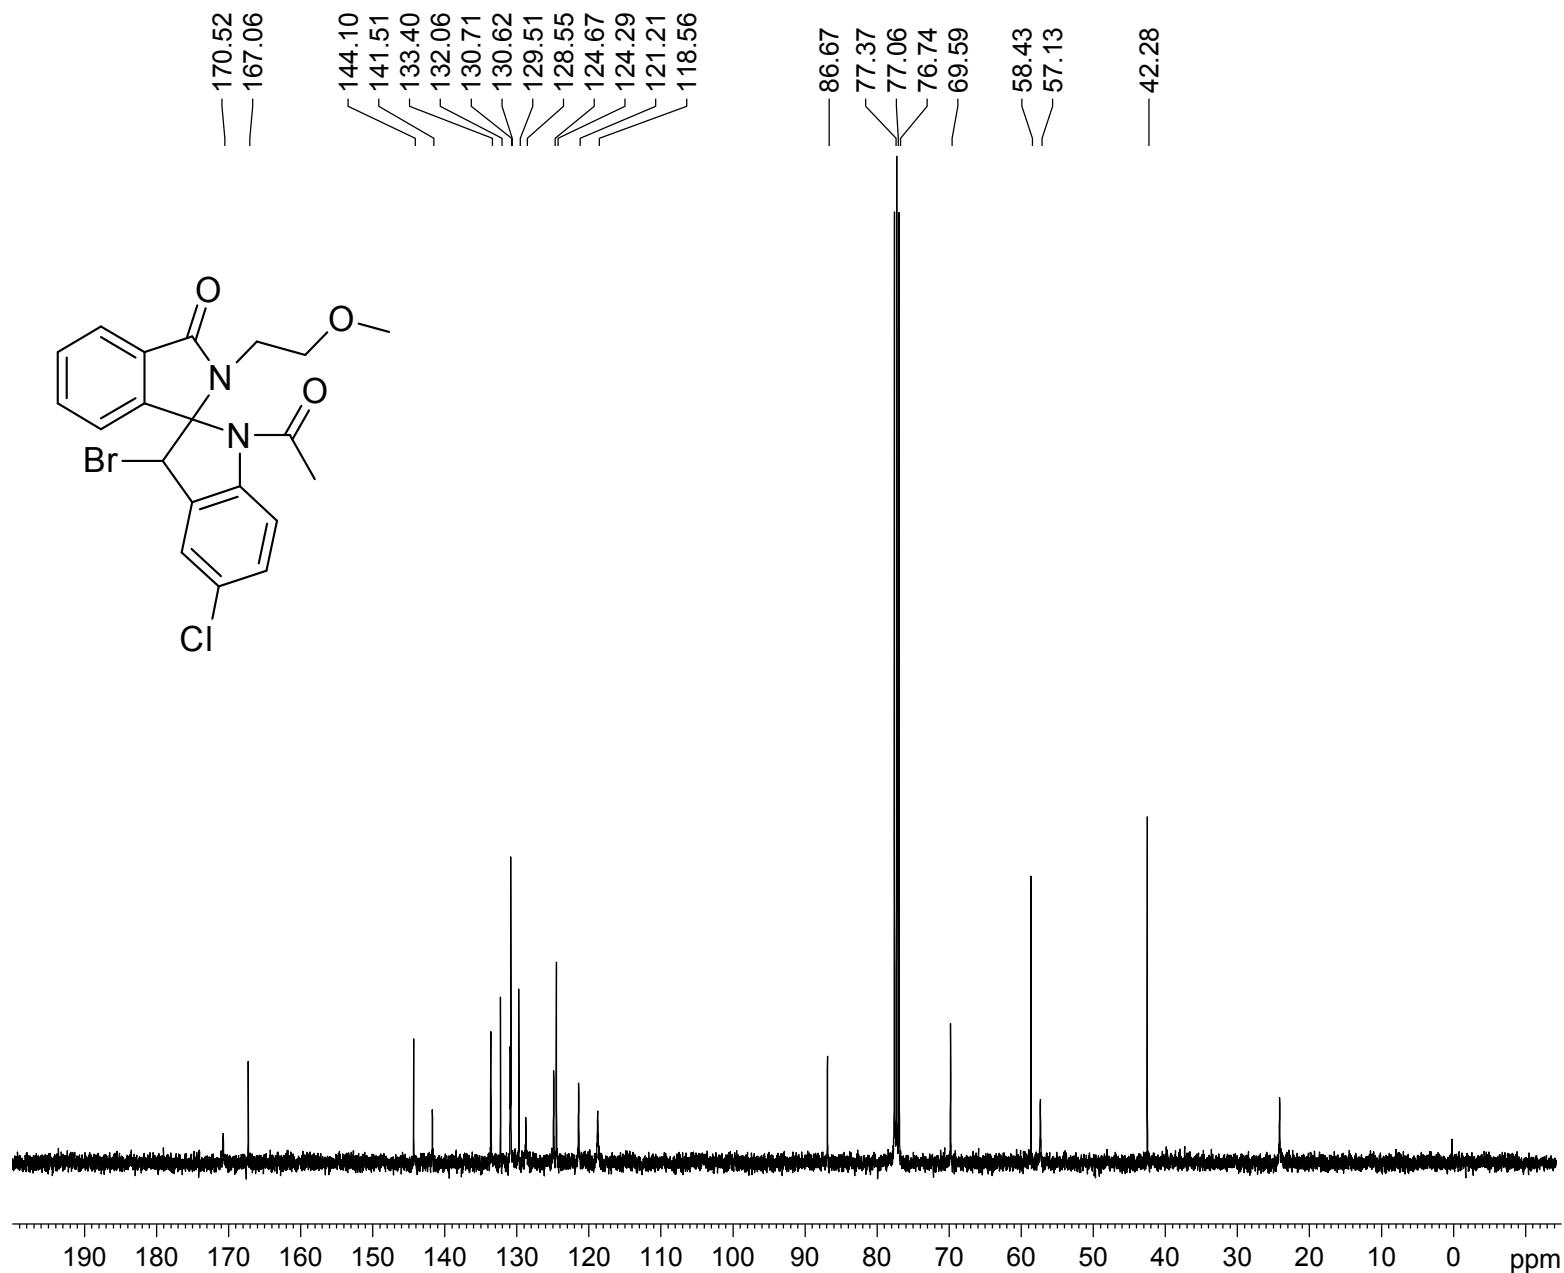

Current Data Parameters

NAME spiro  
EXPNO 25  
PROCNO 1

F2 - Acquisition Parameters

Date\_ 20150922  
Time 17.08  
INSTRUM spect  
PROBHD 5 mm BBO BB-1H  
PULPROG zgpg30  
TD 32768  
SOLVENT CDCl3  
NS 298  
DS 0  
SWH 24038.461 Hz  
FIDRES 0.733596 Hz  
AQ 0.6815744 sec  
RG 8192  
DW 20.800 usec  
DE 6.50 usec  
TE 298.3 K  
D1 2.00000000 sec  
D11 0.03000000 sec  
TD0 1

===== CHANNEL f1 =====

NUC1 13C  
P1 9.00 usec  
PL1 7.00 dB  
SFO1 100.6233325 MHz

===== CHANNEL f2 =====

CPDPRG[2] waltz16  
NUC2 1H  
PCPD2 90.00 usec  
PL2 1.00 dB  
PL12 16.00 dB  
PL13 19.00 dB  
SFO2 400.1316005 MHz

F2 - Processing parameters

SI 32768  
SF 100.6127514 MHz  
WDW EM  
SSB 0  
LB 1.00 Hz  
GB 0  
PC 1.00

1-acetyl-3,5-dichloro-2'-(2-methoxyethyl) spiro[indoline-2,1'-isoindolin]-3'-one (6f)

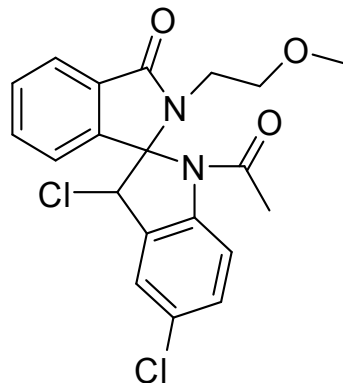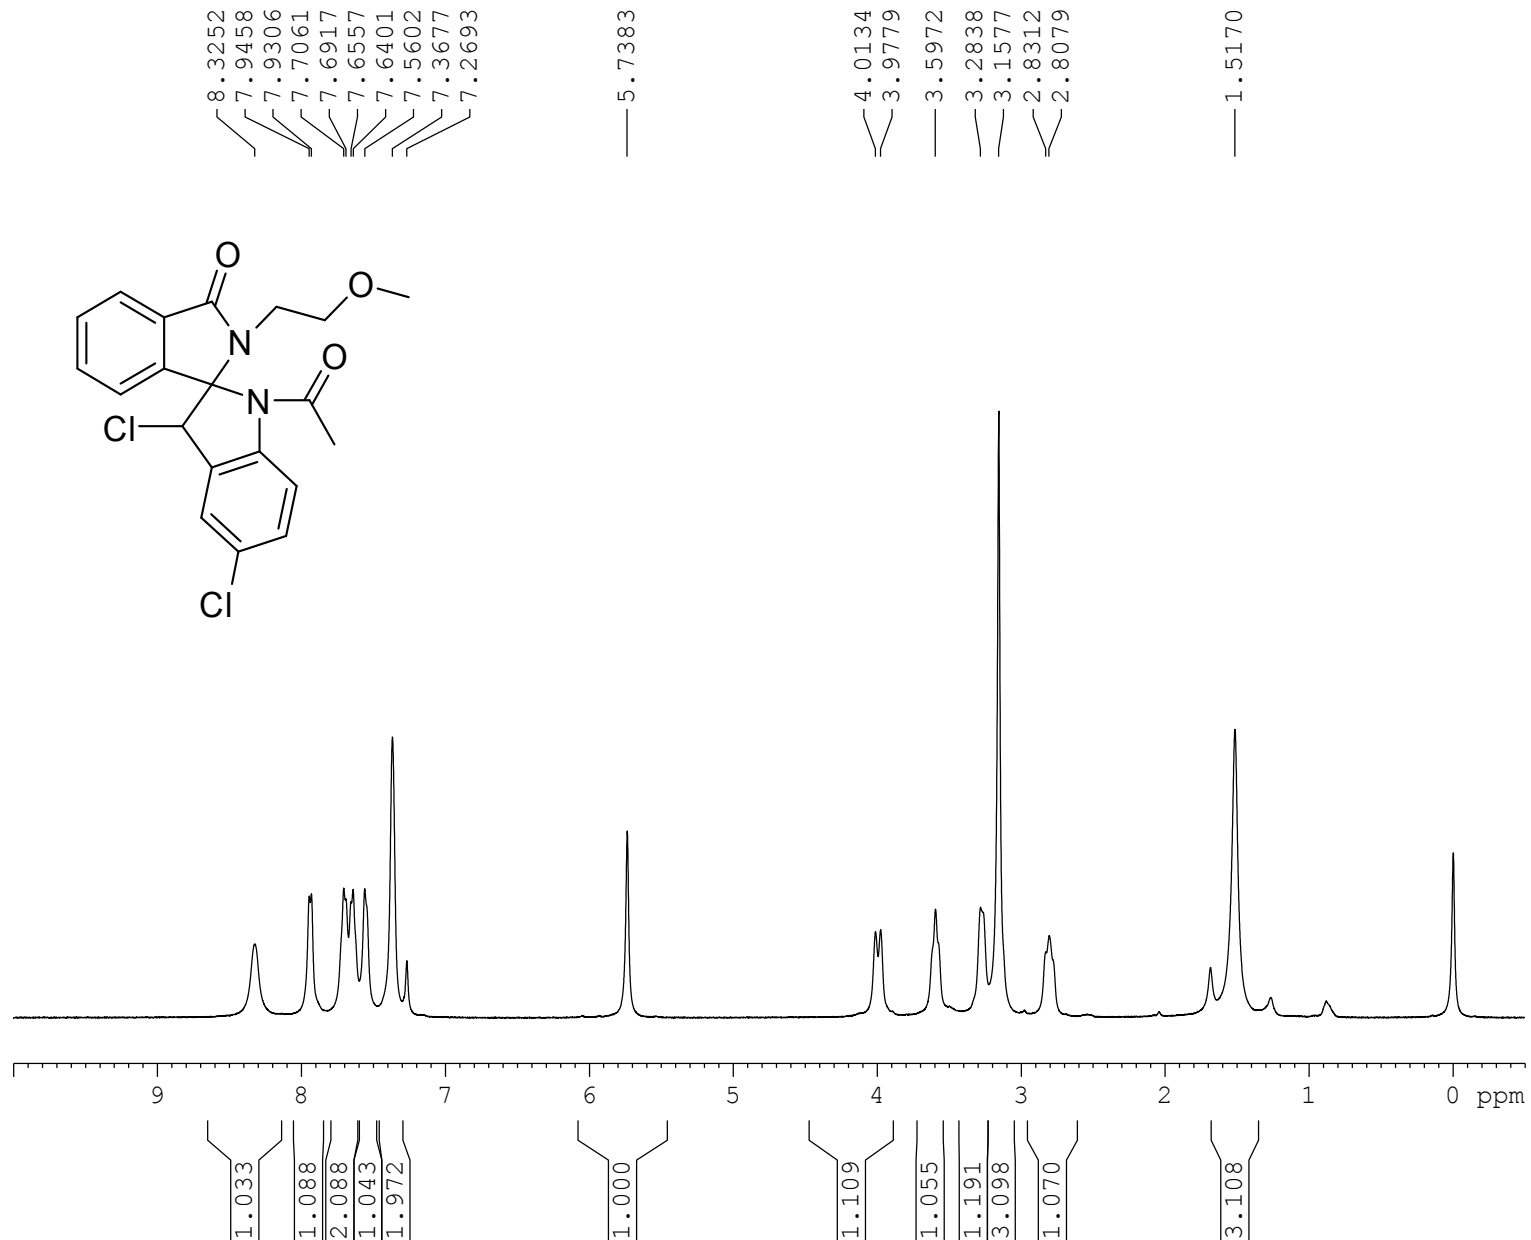

Current Data Parameters  
 NAME spiro  
 EXPNO 26  
 PROCNO 1

F2 - Acquisition Parameters  
 Date\_ 20150924  
 Time 17.18  
 INSTRUM spect  
 PROBHD 5 mm BBO BB-1H  
 PULPROG zg30  
 TD 32768  
 SOLVENT CDCl3  
 NS 32  
 DS 0  
 SWH 7246.377 Hz  
 FIDRES 0.221142 Hz  
 AQ 2.2609921 sec  
 RG 114  
 DW 69.000 usec  
 DE 6.50 usec  
 TE 297.3 K  
 D1 2.00000000 sec  
 TD0 1

===== CHANNEL f1 =====  
 NUC1 1H  
 P1 14.40 usec  
 PL1 1.80 dB  
 SFO1 400.1324008 MHz

F2 - Processing parameters  
 SI 16384  
 SF 400.1300062 MHz  
 WDW EM  
 SSB 0  
 LB 0 Hz  
 GB 0  
 PC 1.00

1-acetyl-3,5-dichloro-2'-(2-methoxyethyl) spiro[indoline-2,1'-isoindolin]-3'-one (6f)

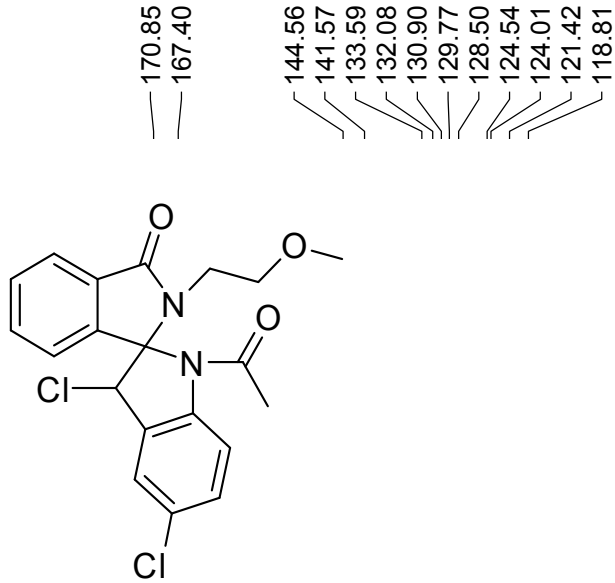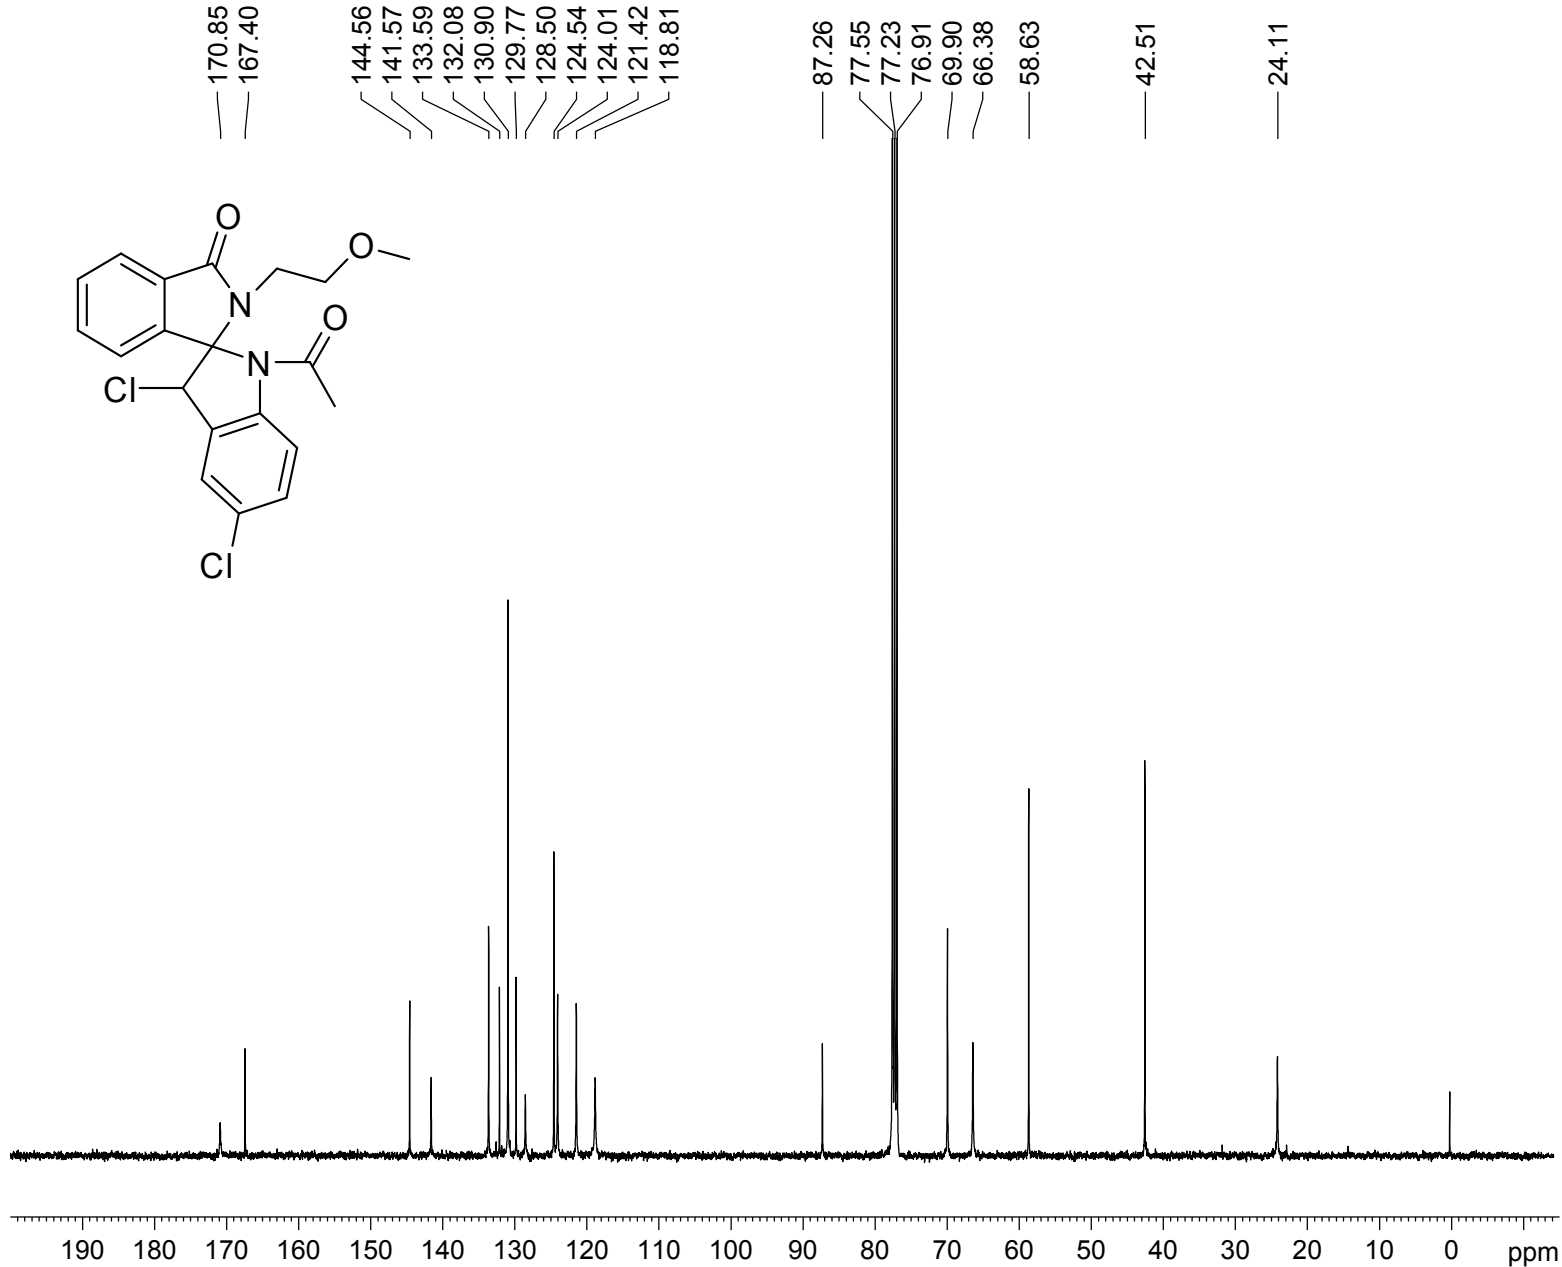

Current Data Parameters  
 NAME spiro1  
 EXPNO 49  
 PROCNO 1

F2 - Acquisition Parameters  
 Date\_ 20150925  
 Time 17.44  
 INSTRUM spect  
 PROBHD 5 mm PABBO BB/  
 PULPROG zgpg30  
 TD 32768  
 SOLVENT CDCl3  
 NS 4000  
 DS 0  
 SWH 24038.461 Hz  
 FIDRES 0.733596 Hz  
 AQ 0.6815744 sec  
 RG 198.09  
 DW 20.800 usec  
 DE 6.50 usec  
 TE 298.3 K  
 D1 2.00000000 sec  
 D11 0.03000000 sec  
 TD0 1

===== CHANNEL f1 =====  
 SFO1 100.6233319 MHz  
 NUC1 13C  
 P1 10.00 usec  
 PLW1 47.50000000 W

===== CHANNEL f2 =====  
 SFO2 400.1316005 MHz  
 NUC2 1H  
 CPDPRG[2] waltz16  
 PCPD2 90.00 usec  
 PLW2 15.00000000 W  
 PLW12 0.33750001 W  
 PLW13 0.27338001 W

F2 - Processing parameters  
 SI 32768  
 SF 100.6127480 MHz  
 WDW EM  
 SSB 0  
 LB 2.00 Hz  
 GB 0  
 PC 1.00



1-acetyl-2'-benzyl-3-bromospiro[indoline-2,1'-isoindolin]-3'-one (6h)

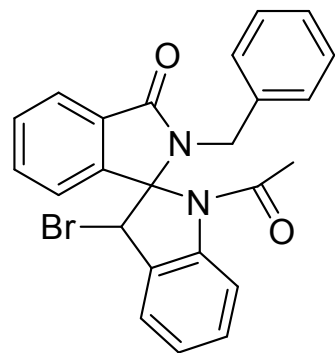

8.0755  
7.9254  
7.9087  
7.9057  
7.5744  
7.5565  
7.4247  
7.4074  
7.3728  
7.2302  
7.2116  
7.1896  
7.1303  
7.1132  
7.0949  
7.0795  
6.8757  
5.8283  
5.2774  
5.2399

3.5083  
3.4702

1.6123

0.9712

Current Data Parameters  
NAME project 1  
EXPNO 96  
PROCNO 1

F2 - Acquisition Parameters  
Date\_ 20150830  
Time 8.25  
INSTRUM spect  
PROBHD 5 mm PABBO BB/  
PULPROG zg30  
TD 32768  
SOLVENT CDCl3  
NS 16  
DS 0  
SWH 7211.539 Hz  
FIDRES 0.220079 Hz  
AQ 2.2719147 sec  
RG 99.72  
DW 69.333 usec  
DE 10.50 usec  
TE 297.7 K  
D1 2.0000000 sec  
TD0 1

===== CHANNEL f1 =====  
SFO1 400.1324008 MHz  
NUC1 1H  
P1 12.90 usec  
PLW1 15.00000000 W

F2 - Processing parameters  
SI 16384  
SF 400.1300380 MHz  
WDW EM  
SSB 0  
LB 0 Hz  
GB 0  
PC 1.00

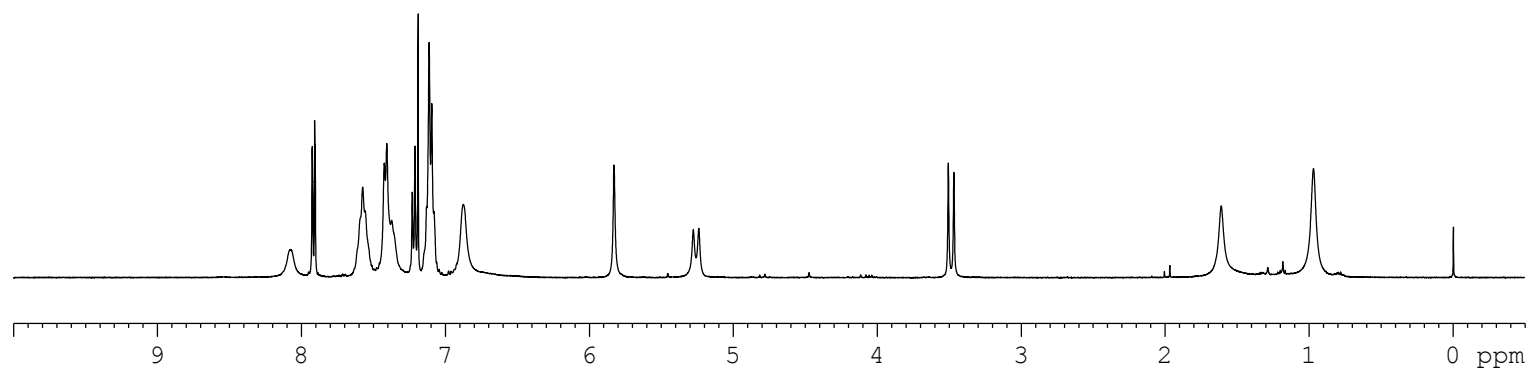

0.853  
1.035  
2.184  
3.091  
0.938  
3.195  
1.932

1.000

1.052

1.056

2.841

1-acetyl-2'-benzyl-3-bromospiro[indoline-2,1'-isoindolin]-3'-one (6h)

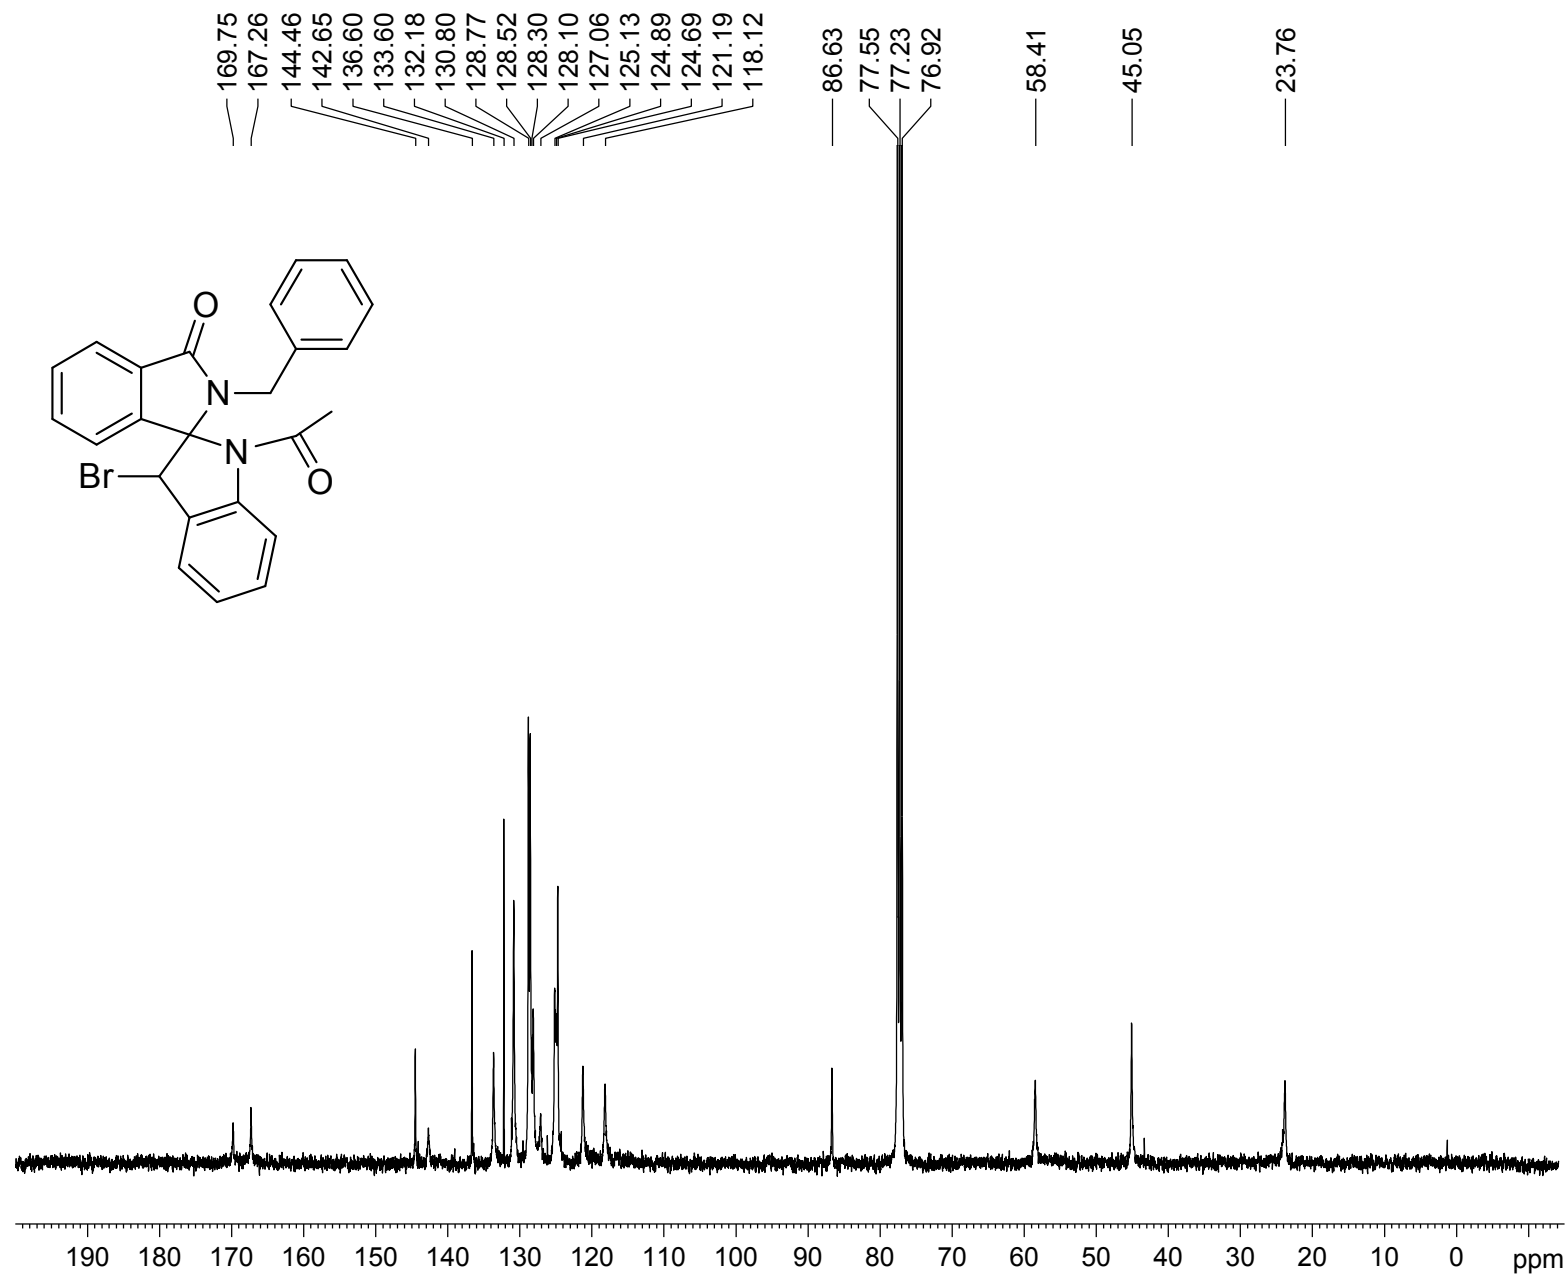

Current Data Parameters

NAME project 1  
 EXPNO 97  
 PROCNO 1

F2 - Acquisition Parameters

Date\_ 20150830  
 Time 8.28  
 INSTRUM spect  
 PROBHD 5 mm PABBO BB/  
 PULPROG zgpg30  
 TD 32768  
 SOLVENT CDCl3  
 NS 7787  
 DS 0  
 SWH 24038.461 Hz  
 FIDRES 0.733596 Hz  
 AQ 0.6815744 sec  
 RG 198.09  
 DW 20.800 usec  
 DE 6.50 usec  
 TE 297.8 K  
 D1 2.00000000 sec  
 D11 0.03000000 sec  
 TD0 1

===== CHANNEL f1 =====

SFO1 100.6233319 MHz  
 NUC1 13C  
 P1 10.00 usec  
 PLW1 47.50000000 W

===== CHANNEL f2 =====

SFO2 400.1316005 MHz  
 NUC2 1H  
 CPDPRG[2] waltz16  
 PCPD2 90.00 usec  
 PLW2 15.00000000 W  
 PLW12 0.33750001 W  
 PLW13 0.27338001 W

F2 - Processing parameters

SI 32768  
 SF 100.6127479 MHz  
 WDW EM  
 SSB 0  
 LB 2.00 Hz  
 GB 0  
 PC 1.00

1-acetyl-2'-benzyl-3,6-dibromospiro[indoline-2,1'-isoindolin]-3'-one (6i)

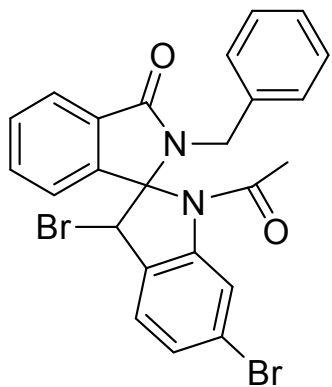

8.2868  
7.9906  
7.9781  
7.6581  
7.4743  
7.4087  
7.3474  
7.2114  
6.9112

5.7966  
5.3865  
5.3502

3.5690  
3.5315

1.0713

Current Data Parameters  
NAME spiro1  
EXPNO 39  
PROCNO 1

F2 - Acquisition Parameters  
Date\_ 20150920  
Time 1.02  
INSTRUM spect  
PROBHD 5 mm PABBO BB/  
PULPROG zg30  
TD 32768  
SOLVENT CDCl3  
NS 32  
DS 0  
SWH 7211.539 Hz  
FIDRES 0.220079 Hz  
AQ 2.2719147 sec  
RG 71.42  
DW 69.333 usec  
DE 10.50 usec  
TE 298.5 K  
D1 2.00000000 sec  
TD0 1

===== CHANNEL f1 =====  
SFO1 400.1324008 MHz  
NUC1 1H  
P1 12.90 usec  
PLW1 15.00000000 W

F2 - Processing parameters  
SI 16384  
SF 400.1300101 MHz  
WDW EM  
SSB 0  
LB 0 Hz  
GB 0  
PC 1.00

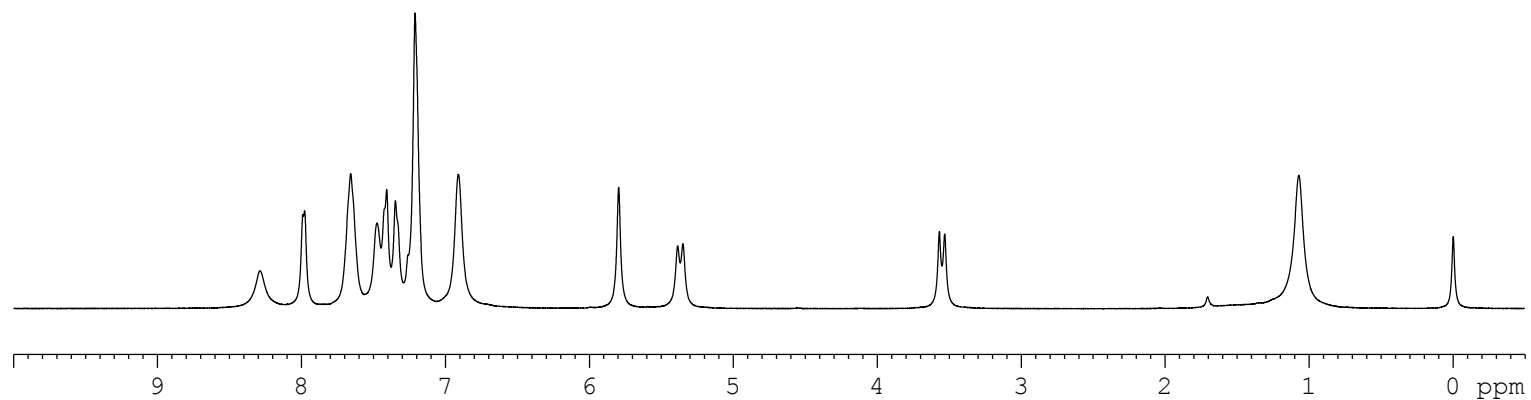

0.855  
1.058  
2.056  
3.090  
3.059  
2.067

1.004  
1.057

1.062

2.992

1-acetyl-2'-benzyl-3,6-dibromospiro[indoline-2,1'-isoindolin]-3'-one (6i)

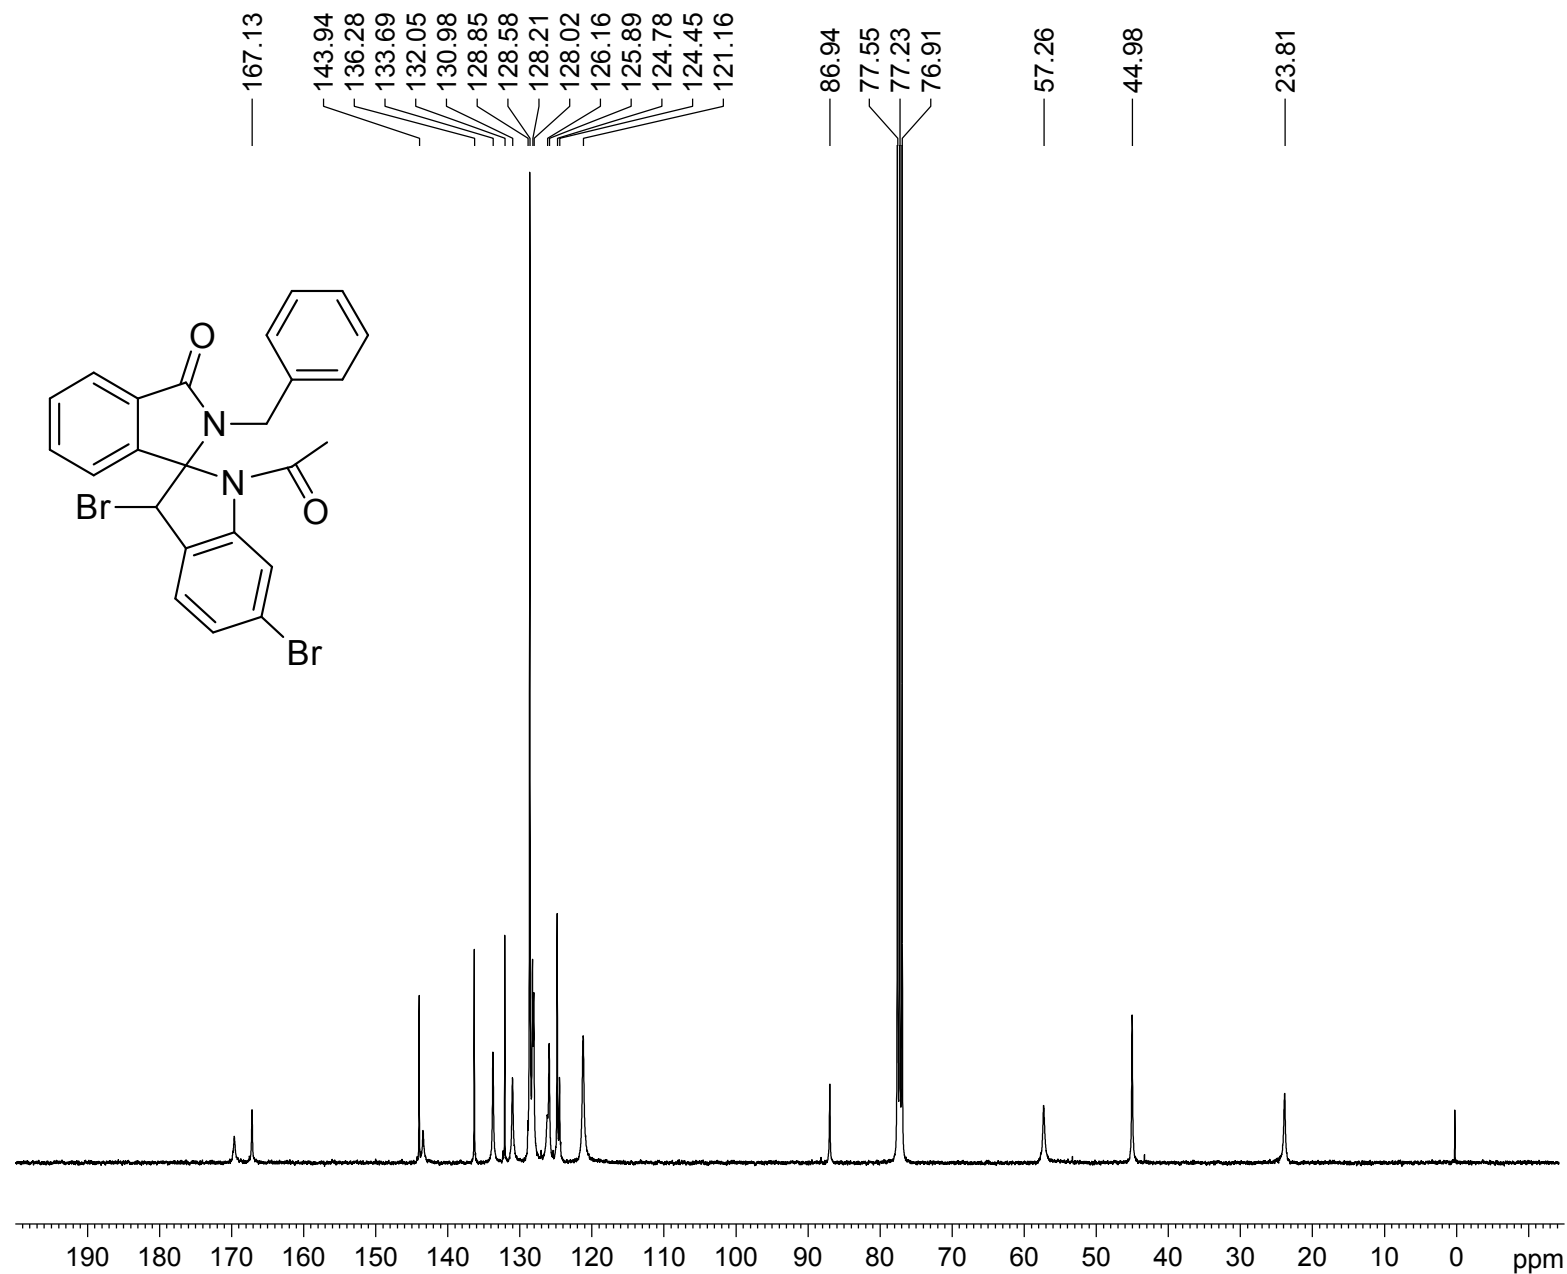

Current Data Parameters

NAME spiro1  
 EXPNO 40  
 PROCNO 1

F2 - Acquisition Parameters

Date\_ 20150920  
 Time 1.05  
 INSTRUM spect  
 PROBHD 5 mm PABBO BB/  
 PULPROG zgpg30  
 TD 32768  
 SOLVENT CDCl3  
 NS 15000  
 DS 0  
 SWH 24038.461 Hz  
 FIDRES 0.733596 Hz  
 AQ 0.6815744 sec  
 RG 198.09  
 DW 20.800 usec  
 DE 6.50 usec  
 TE 298.4 K  
 D1 2.00000000 sec  
 D11 0.03000000 sec  
 TD0 1

===== CHANNEL f1 =====

SFO1 100.6233319 MHz  
 NUC1 13C  
 P1 10.00 usec  
 PLW1 47.50000000 W

===== CHANNEL f2 =====

SFO2 400.1316005 MHz  
 NUC2 1H  
 CPDPRG[2] waltz16  
 PCPD2 90.00 usec  
 PLW2 15.00000000 W  
 PLW12 0.33750001 W  
 PLW13 0.27338001 W

F2 - Processing parameters

SI 32768  
 SF 100.6127508 MHz  
 WDW EM  
 SSB 0  
 LB 2.00 Hz  
 GB 0  
 PC 1.00

1-acetyl-2'-benzyl-3,5'-dibromo-5-chlorospiro[indoline-2,1'-isoindolin]-3'-one (6j)

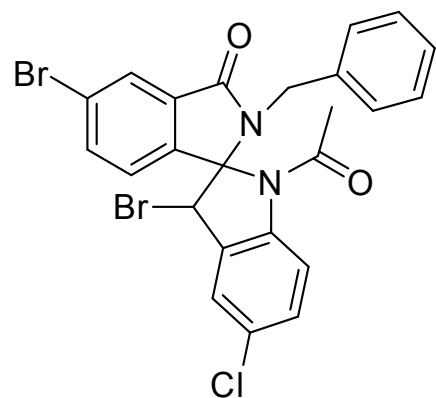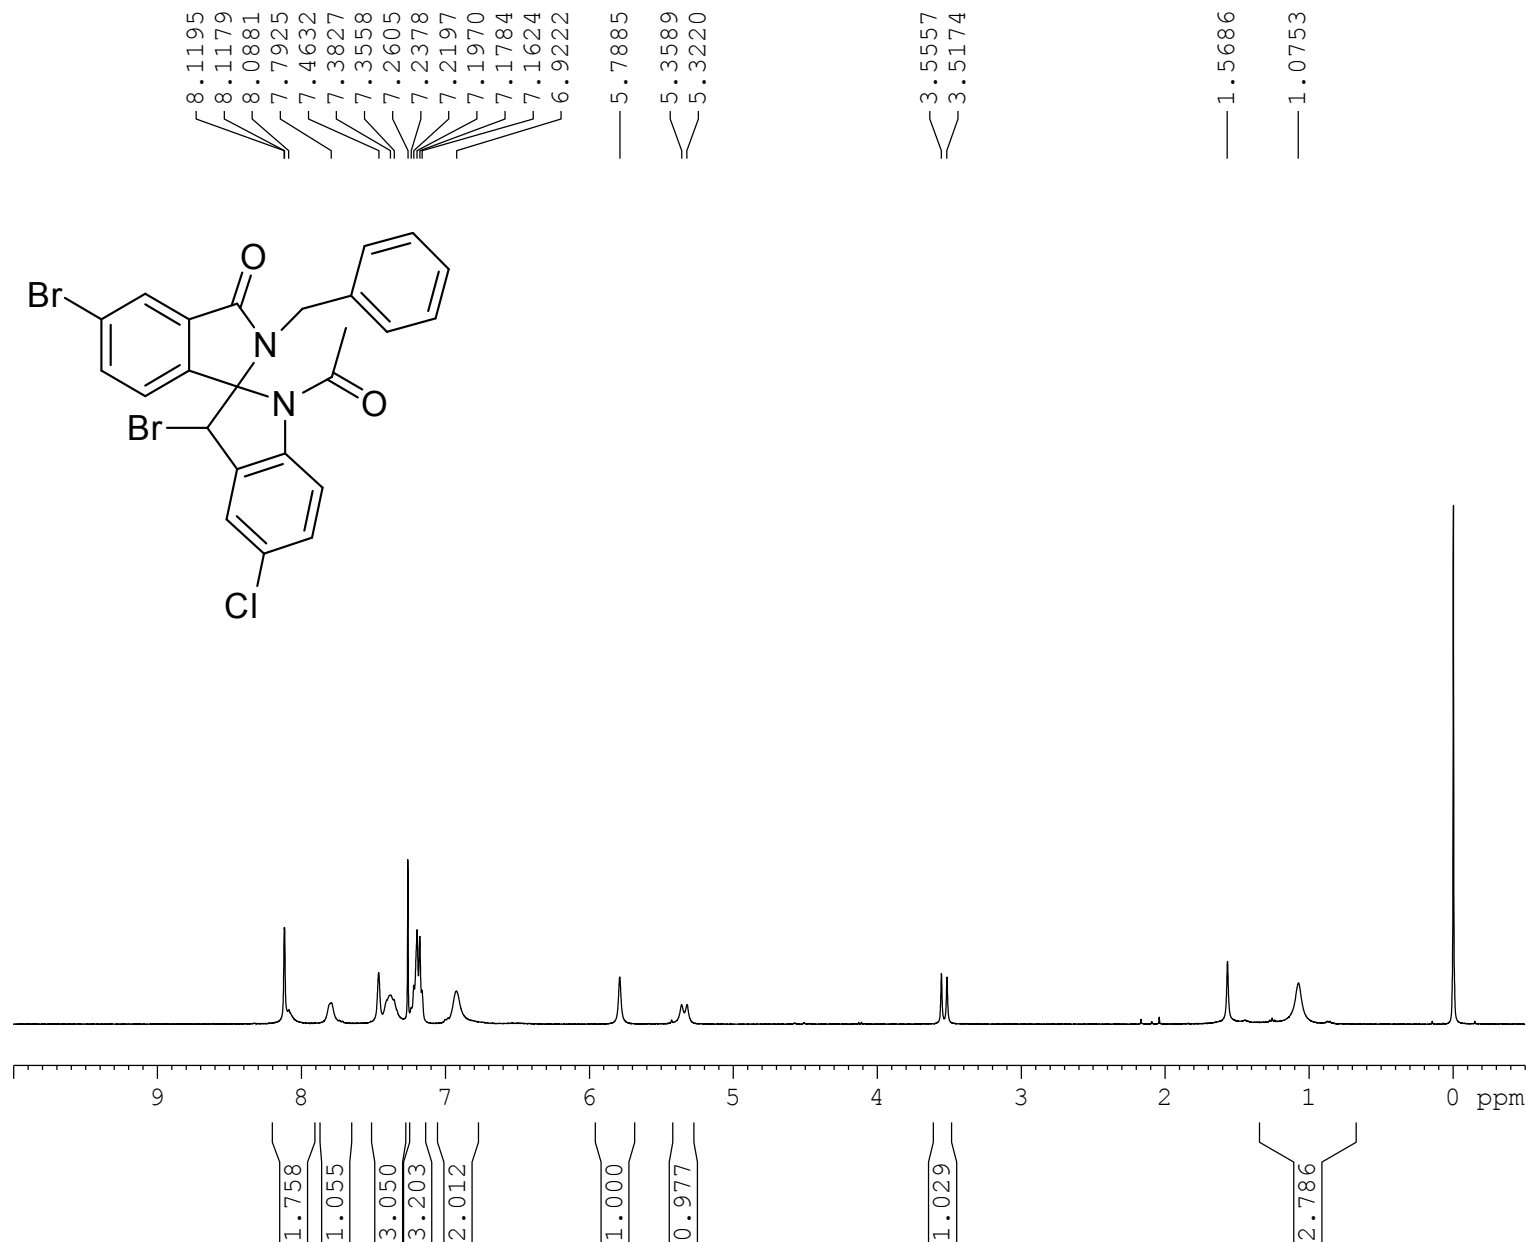

Current Data Parameters  
 NAME spiro1  
 EXPNO 7  
 PROCNO 1

F2 - Acquisition Parameters  
 Date\_ 20150902  
 Time 20.35  
 INSTRUM spect  
 PROBHD 5 mm PABBO BB/  
 PULPROG zg30  
 TD 32768  
 SOLVENT CDCl3  
 NS 32  
 DS 0  
 SWH 7211.539 Hz  
 FIDRES 0.220079 Hz  
 AQ 2.2719147 sec  
 RG 144.49  
 DW 69.333 usec  
 DE 10.50 usec  
 TE 298.6 K  
 D1 2.00000000 sec  
 TD0 1

===== CHANNEL f1 =====  
 SFO1 400.1324008 MHz  
 NUC1 1H  
 P1 12.90 usec  
 PLW1 15.00000000 W

F2 - Processing parameters  
 SI 16384  
 SF 400.1300099 MHz  
 WDW EM  
 SSB 0  
 LB 0 Hz  
 GB 0  
 PC 1.00

1-acetyl-2'-benzyl-3,5'-dibromo-5-chlorospiro[indoline-2,1'-isoindolin]-3'-one (6j)

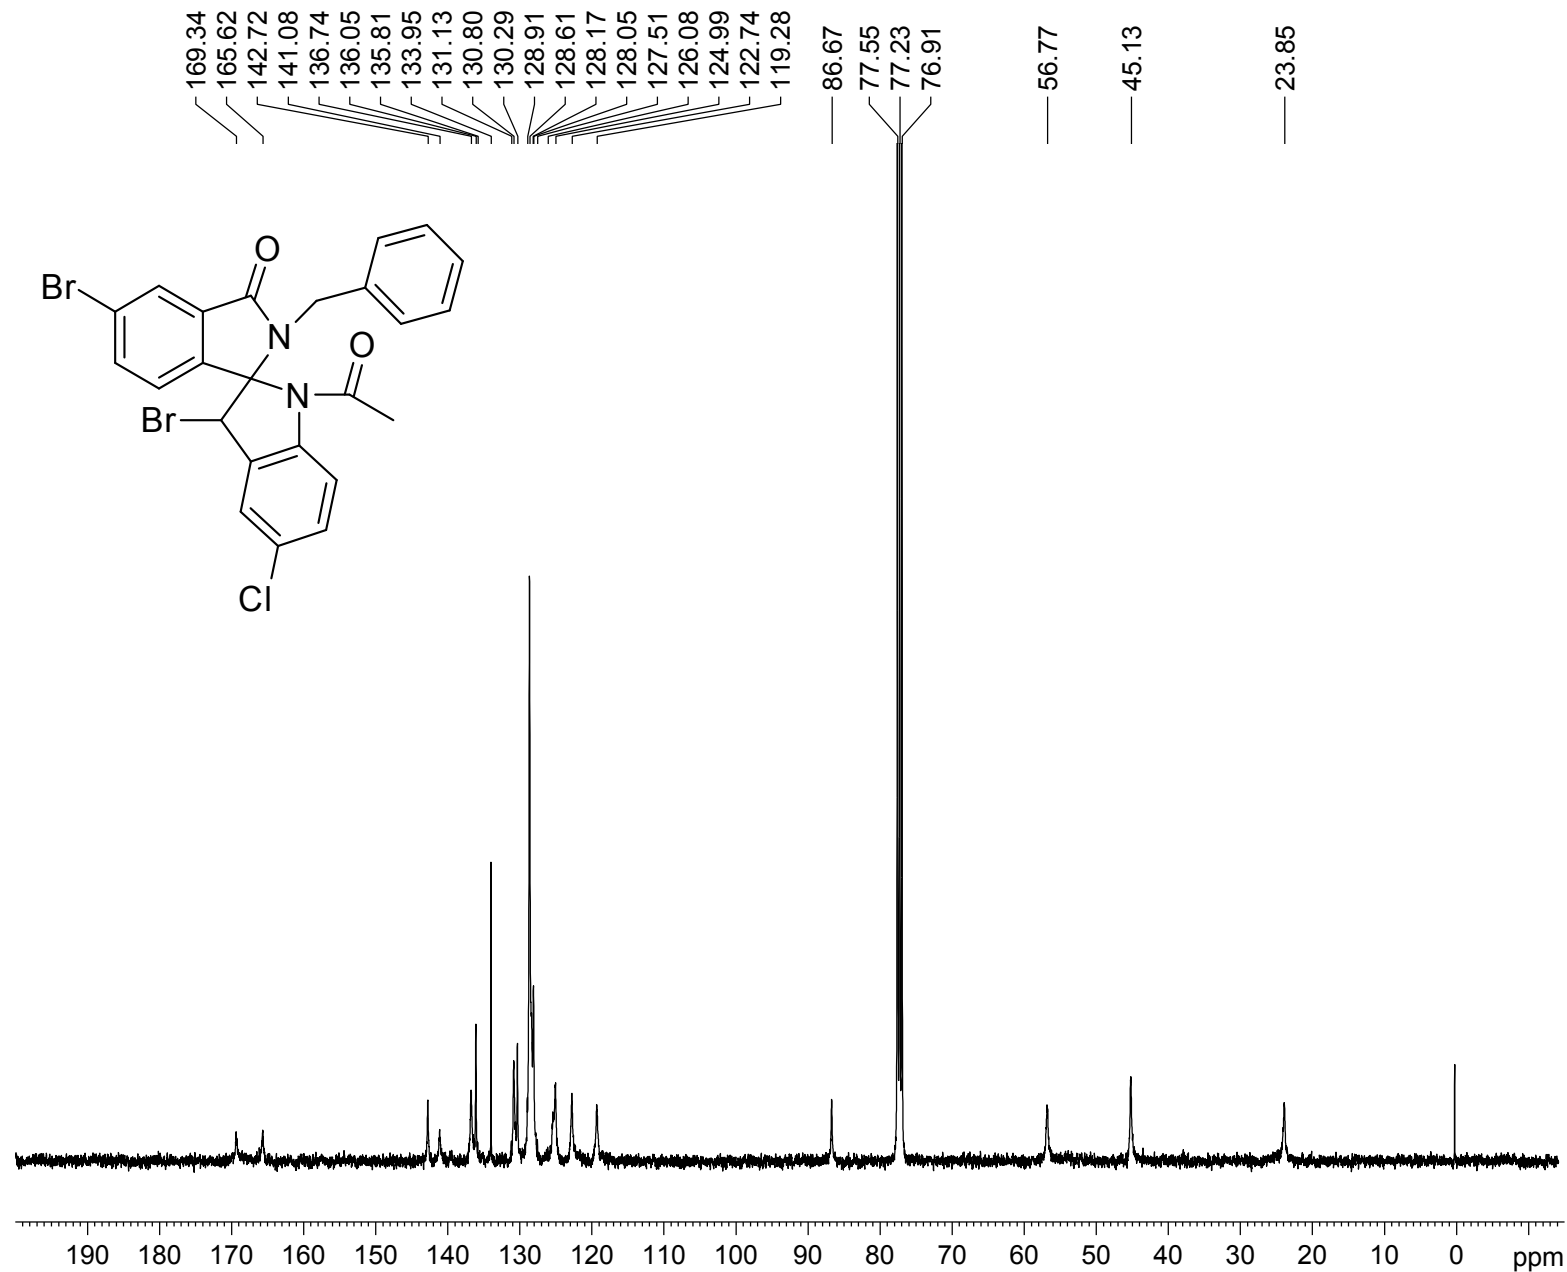

Current Data Parameters

NAME spiro1  
EXPNO 10  
PROCNO 1

F2 - Acquisition Parameters

Date\_ 20150903  
Time 8.11  
INSTRUM spect  
PROBHD 5 mm PABBO BB/  
PULPROG zgpg30  
TD 32768  
SOLVENT CDCl3  
NS 3144  
DS 0  
SWH 24038.461 Hz  
FIDRES 0.733596 Hz  
AQ 0.6815744 sec  
RG 198.09  
DW 20.800 usec  
DE 6.50 usec  
TE 298.5 K  
D1 2.00000000 sec  
D11 0.03000000 sec  
TD0 1

===== CHANNEL f1 =====

SFO1 100.6233319 MHz  
NUC1 13C  
P1 10.00 usec  
PLW1 47.50000000 W

===== CHANNEL f2 =====

SFO2 400.1316005 MHz  
NUC2 1H  
CPDPRG[2] waltz16  
PCPD2 90.00 usec  
PLW2 15.00000000 W  
PLW12 0.33750001 W  
PLW13 0.27338001 W

F2 - Processing parameters

SI 32768  
SF 100.6127494 MHz  
WDW EM  
SSB 0  
LB 2.00 Hz  
GB 0  
PC 1.00

1-acetyl-3-bromo-2'-phenylspiro[indoline-2,1'-isoindolin]-3'-one (6k)

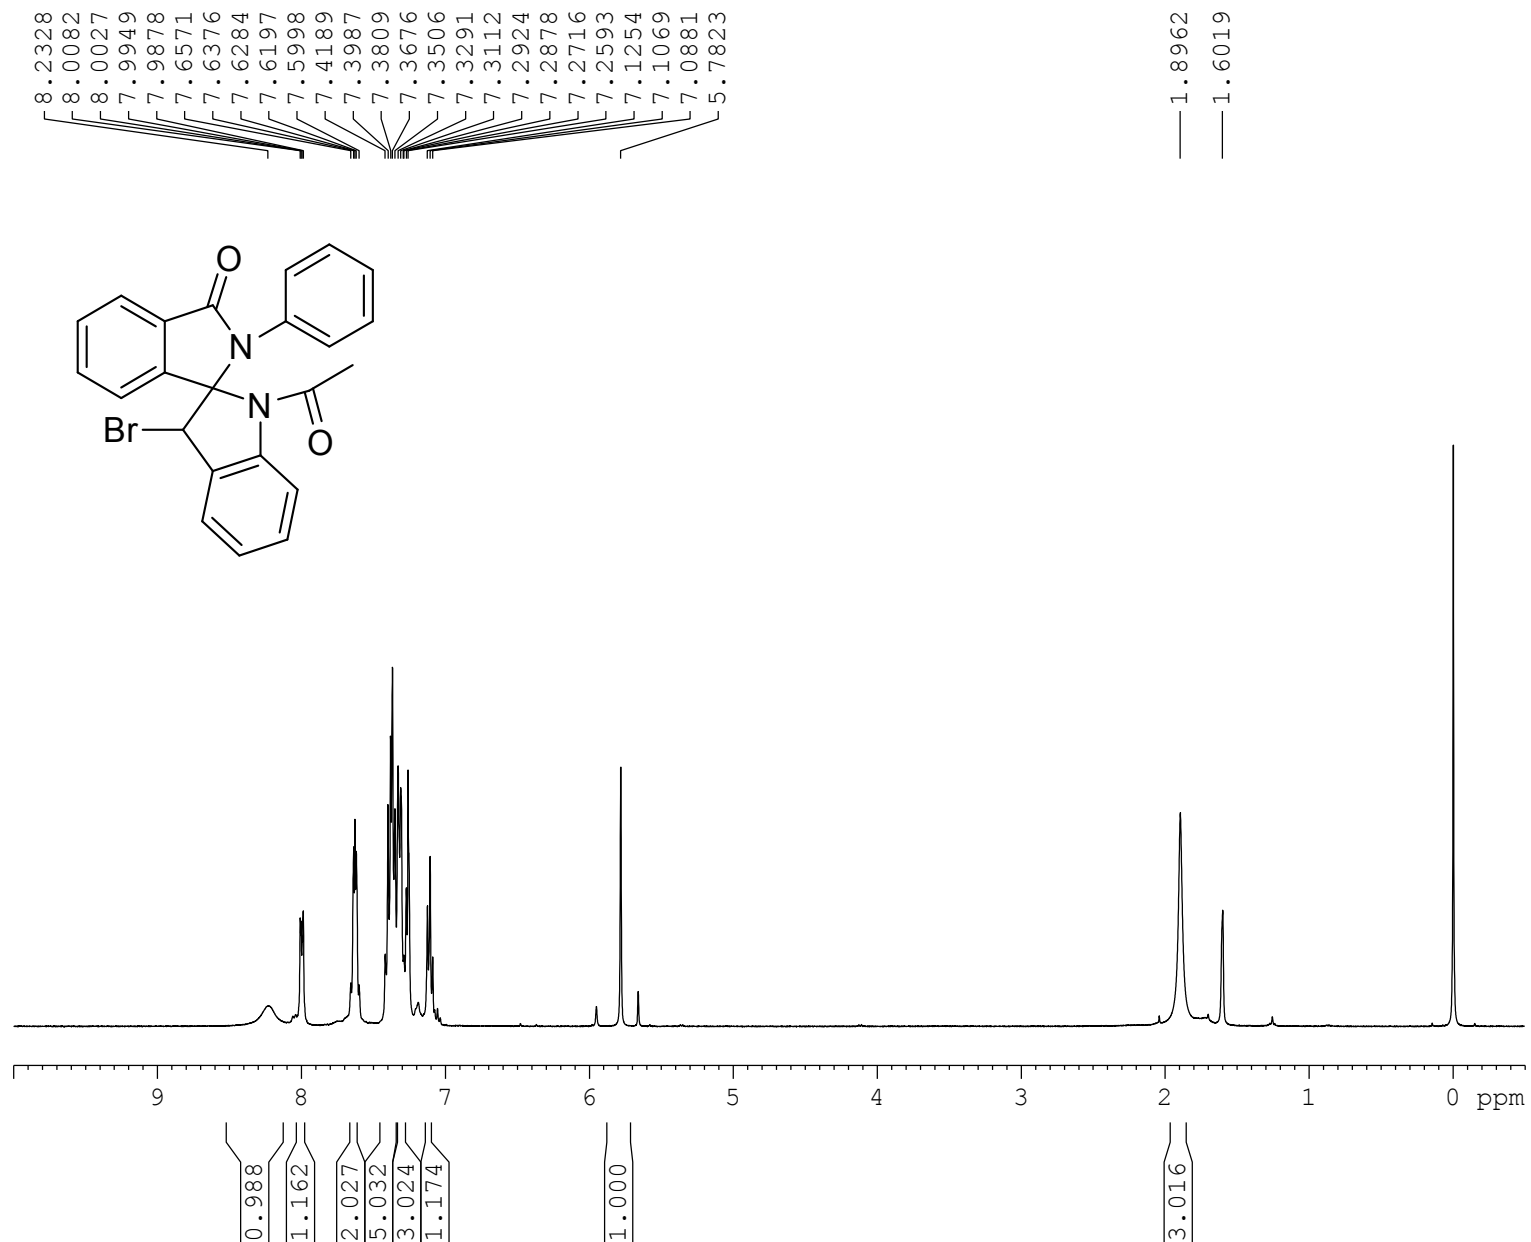

Current Data Parameters  
 NAME spiro1  
 EXPNO 13  
 PROCNO 1

F2 - Acquisition Parameters  
 Date\_ 20150903  
 Time 15.11  
 INSTRUM spect  
 PROBHD 5 mm PABBO BB/  
 PULPROG zg30  
 TD 32768  
 SOLVENT CDCl3  
 NS 32  
 DS 0  
 SWH 7211.539 Hz  
 FIDRES 0.220079 Hz  
 AQ 2.2719147 sec  
 RG 113.31  
 DW 69.333 usec  
 DE 10.50 usec  
 TE 298.3 K  
 D1 2.00000000 sec  
 TD0 1

===== CHANNEL f1 =====  
 SFO1 400.1324008 MHz  
 NUC1 1H  
 P1 12.90 usec  
 PLW1 15.00000000 W

F2 - Processing parameters  
 SI 16384  
 SF 400.1300101 MHz  
 WDW EM  
 SSB 0  
 LB 0 Hz  
 GB 0  
 PC 1.00

1-acetyl-3-bromo-2'-phenylspiro[indoline-2,1'-isoindolin]-3'-one (6k)

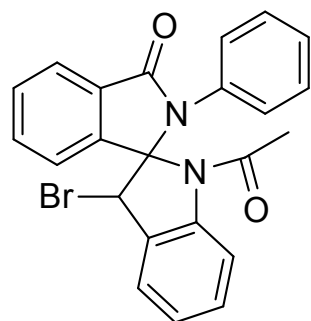

170.29  
167.63  
144.17  
142.62  
134.60  
133.27  
131.04  
130.83  
130.09  
128.40  
127.40  
127.08  
125.80  
124.94  
124.41  
123.65  
117.28  
89.95  
77.55  
77.23  
76.91  
52.70  
24.25

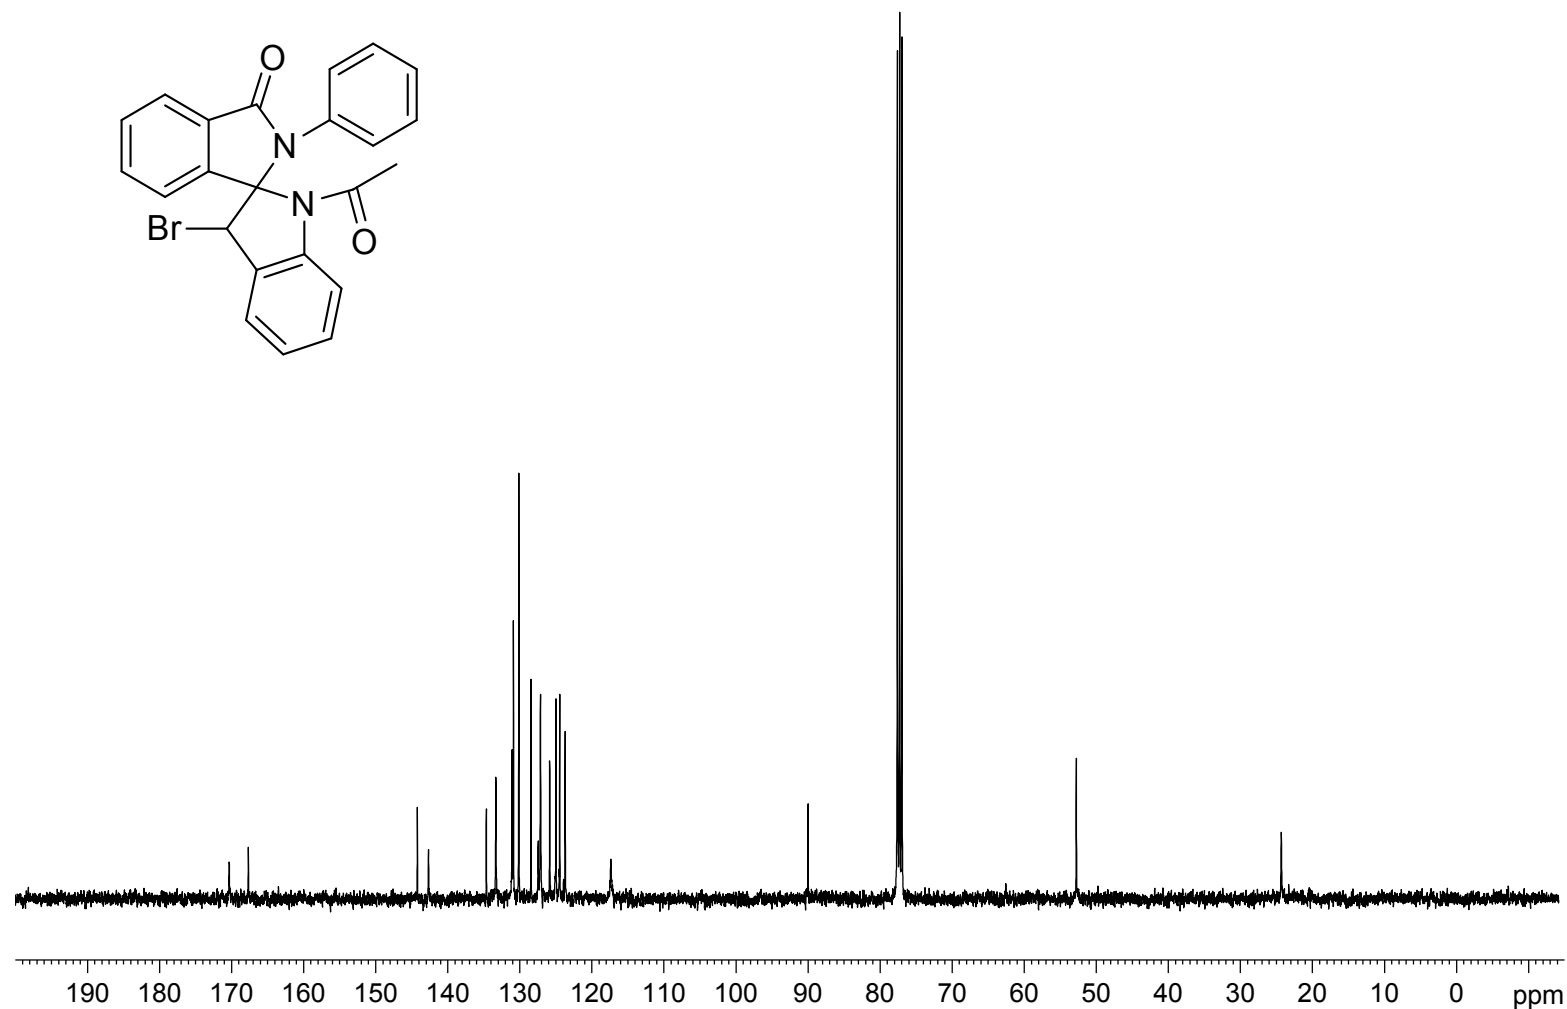

Current Data Parameters

NAME project 1  
EXPNO 37  
PROCNO 1

F2 - Acquisition Parameters

Date\_ 20150715  
Time 23.06  
INSTRUM spect  
PROBHD 5 mm PABBO BB/  
PULPROG zgpg30  
TD 32768  
SOLVENT CDCl3  
NS 340  
DS 0  
SWH 24038.461 Hz  
FIDRES 0.733596 Hz  
AQ 0.6815744 sec  
RG 198.09  
DW 20.800 usec  
DE 6.50 usec  
TE 299.7 K  
D1 2.0000000 sec  
D11 0.03000000 sec  
TD0 1

===== CHANNEL f1 =====

SFO1 100.6233319 MHz  
NUC1 13C  
P1 10.00 usec  
PLW1 46.00000000 W

===== CHANNEL f2 =====

SFO2 400.1316005 MHz  
NUC2 1H  
CPDPRG[2] waltz16  
PCPD2 90.00 usec  
PLW2 15.00000000 W  
PLW12 0.34252000 W  
PLW13 0.27744001 W

F2 - Processing parameters

SI 32768  
SF 100.6127493 MHz  
WDW EM  
SSB 0  
LB 2.00 Hz  
GB 0  
PC 1.00



1-acetyl-3,5',6-tribromo-2'-phenylspiro[indoline-2,1'-isoindolin]-3'-one (61)

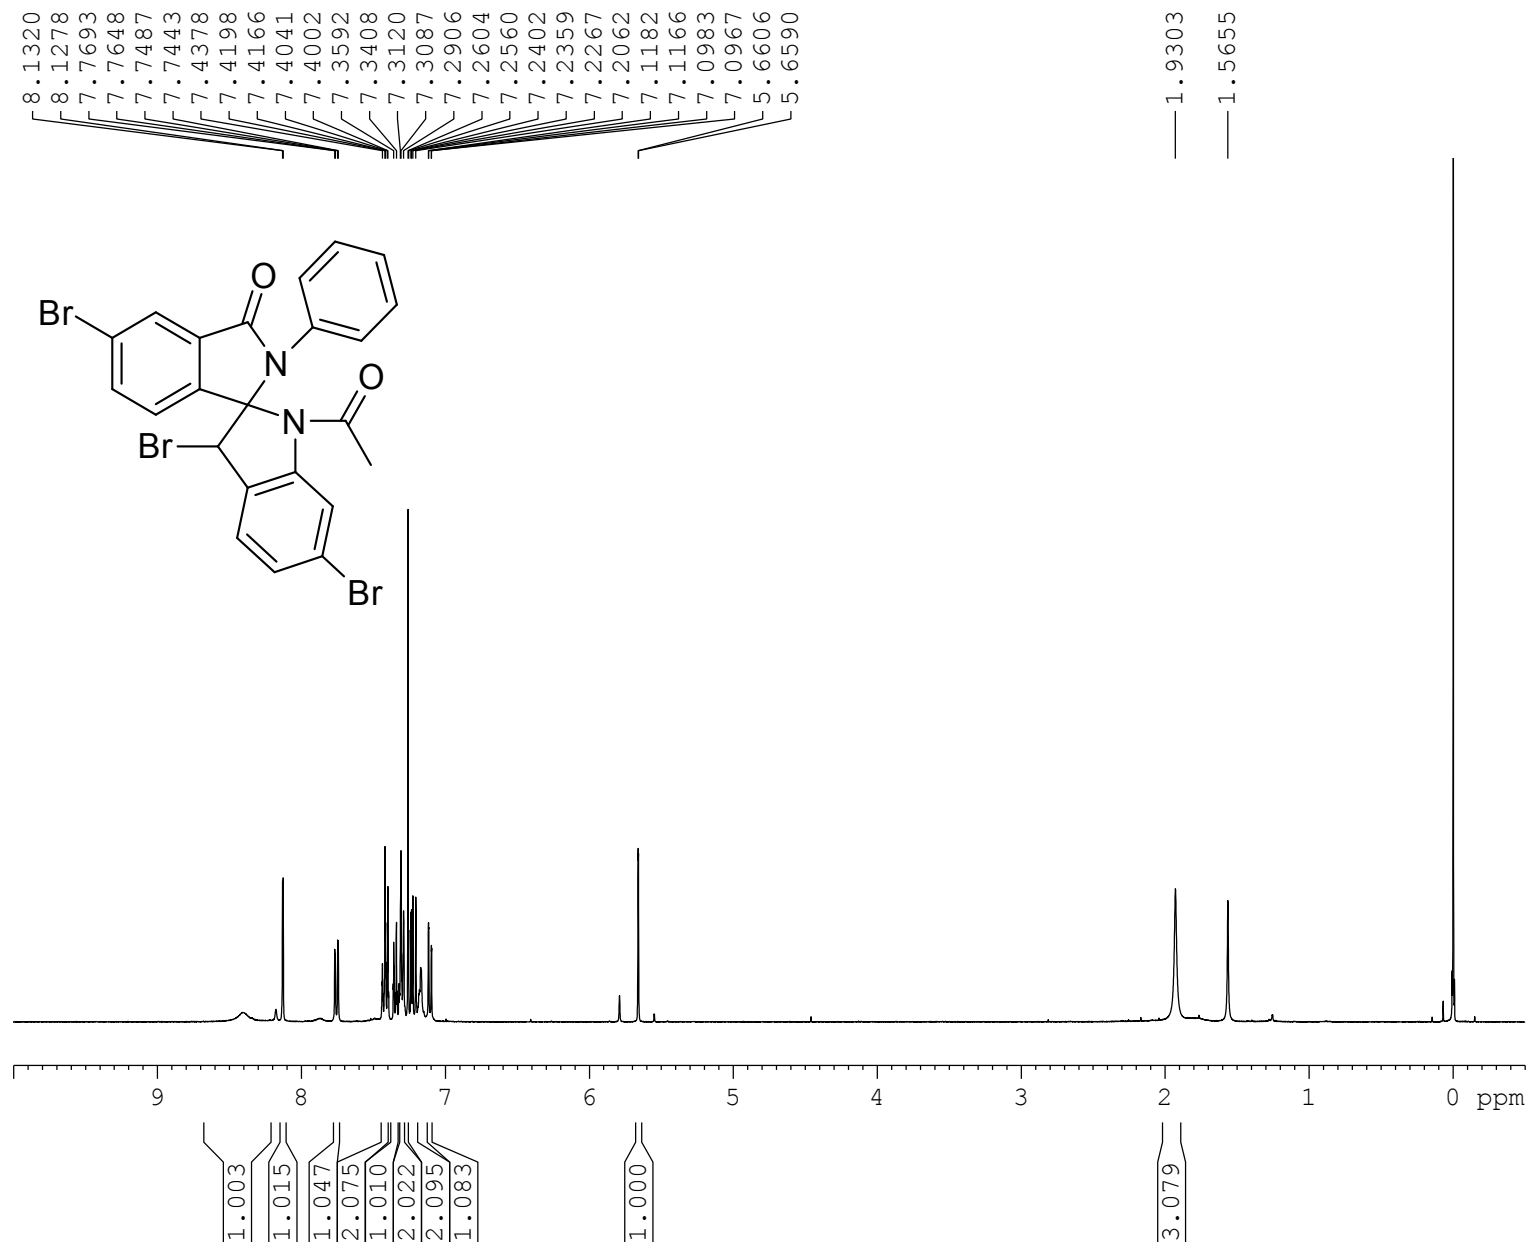

Current Data Parameters  
 NAME spiro1  
 EXPNO 12  
 PROCNO 1

F2 - Acquisition Parameters  
 Date\_ 20150903  
 Time 11.50  
 INSTRUM spect  
 PROBHD 5 mm PABBO BB/  
 PULPROG zg30  
 TD 32768  
 SOLVENT CDCl3  
 NS 32  
 DS 0  
 SWH 7211.539 Hz  
 FIDRES 0.220079 Hz  
 AQ 2.2719147 sec  
 RG 198.09  
 DW 69.333 usec  
 DE 10.50 usec  
 TE 298.1 K  
 D1 2.00000000 sec  
 TD0 1

===== CHANNEL f1 =====  
 SFO1 400.1324008 MHz  
 NUC1 1H  
 P1 12.90 usec  
 PLW1 15.00000000 W

F2 - Processing parameters  
 SI 16384  
 SF 400.1300096 MHz  
 WDW EM  
 SSB 0  
 LB 0 Hz  
 GB 0  
 PC 1.00

1-acetyl-3,5',6-tribromo-2'-phenylspiro[indoline-2,1'-isoindolin]-3'-one (61)

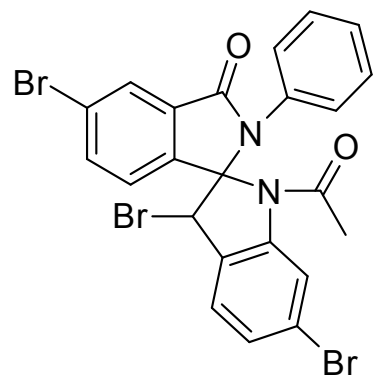

169.97  
165.96  
143.26  
142.40  
136.34  
134.01  
132.62  
130.27  
128.99  
128.84  
128.54  
128.14  
127.70  
127.02  
126.89  
126.25  
125.50  
125.20  
124.81  
120.40  
89.95  
77.55  
77.23  
76.91

51.56

24.38

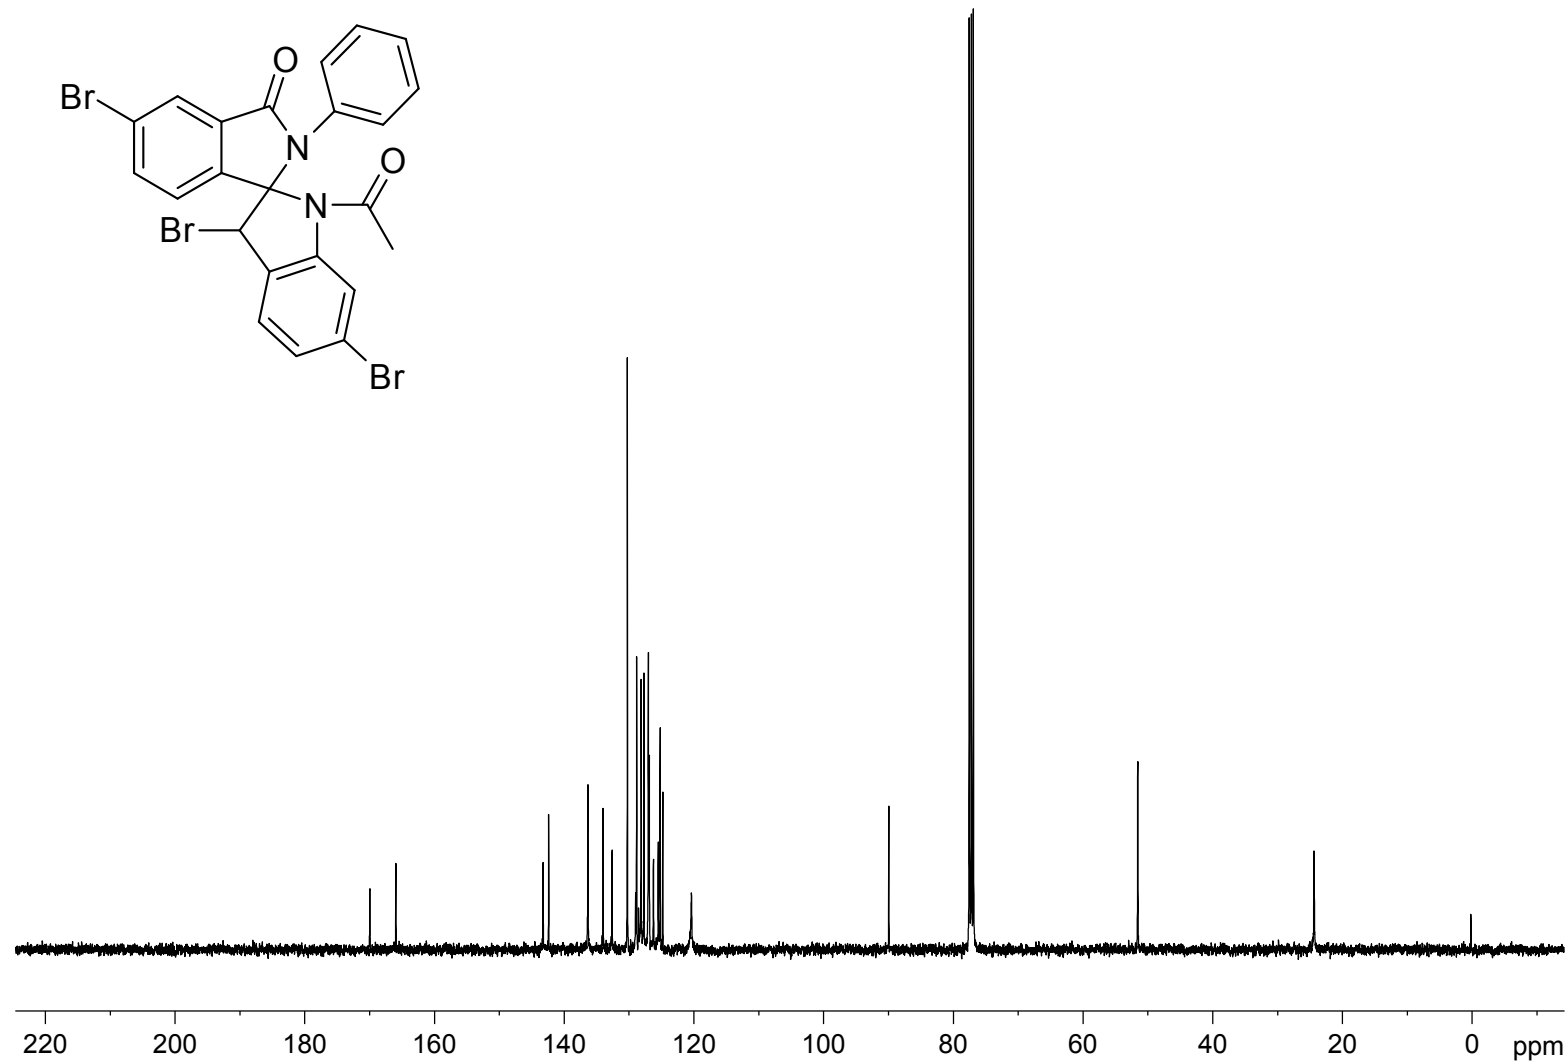

Current Data Parameters

NAME spiro1  
EXPNO 24  
PROCNO 1

F2 - Acquisition Parameters

Date\_ 20150913  
Time 16.08  
INSTRUM spect  
PROBHD 5 mm PABBO BB/  
PULPROG zgpg30  
TD 32768  
SOLVENT CDCl3  
NS 569  
DS 0  
SWH 24038.461 Hz  
FIDRES 0.733596 Hz  
AQ 0.6815744 sec  
RG 198.09  
DW 20.800 usec  
DE 6.50 usec  
TE 298.2 K  
D1 2.00000000 sec  
D11 0.03000000 sec  
TD0 1

===== CHANNEL f1 =====

SFO1 100.6233319 MHz  
NUC1 13C  
P1 10.00 usec  
PLW1 47.50000000 W

===== CHANNEL f2 =====

SFO2 400.1316005 MHz  
NUC2 1H  
CPDPRG[2] waltz16  
PCPD2 90.00 usec  
PLW2 15.00000000 W  
PLW12 0.33750001 W  
PLW13 0.27338001 W

F2 - Processing parameters

SI 32768  
SF 100.6127516 MHz  
WDW EM  
SSB 0  
LB 2.00 Hz  
GB 0  
PC 1.00

1-acetyl-3,5'-dibromo-6-chloro-2'-phenylspiro[indoline-2,1'-isoindolin]-3'-one (6m)

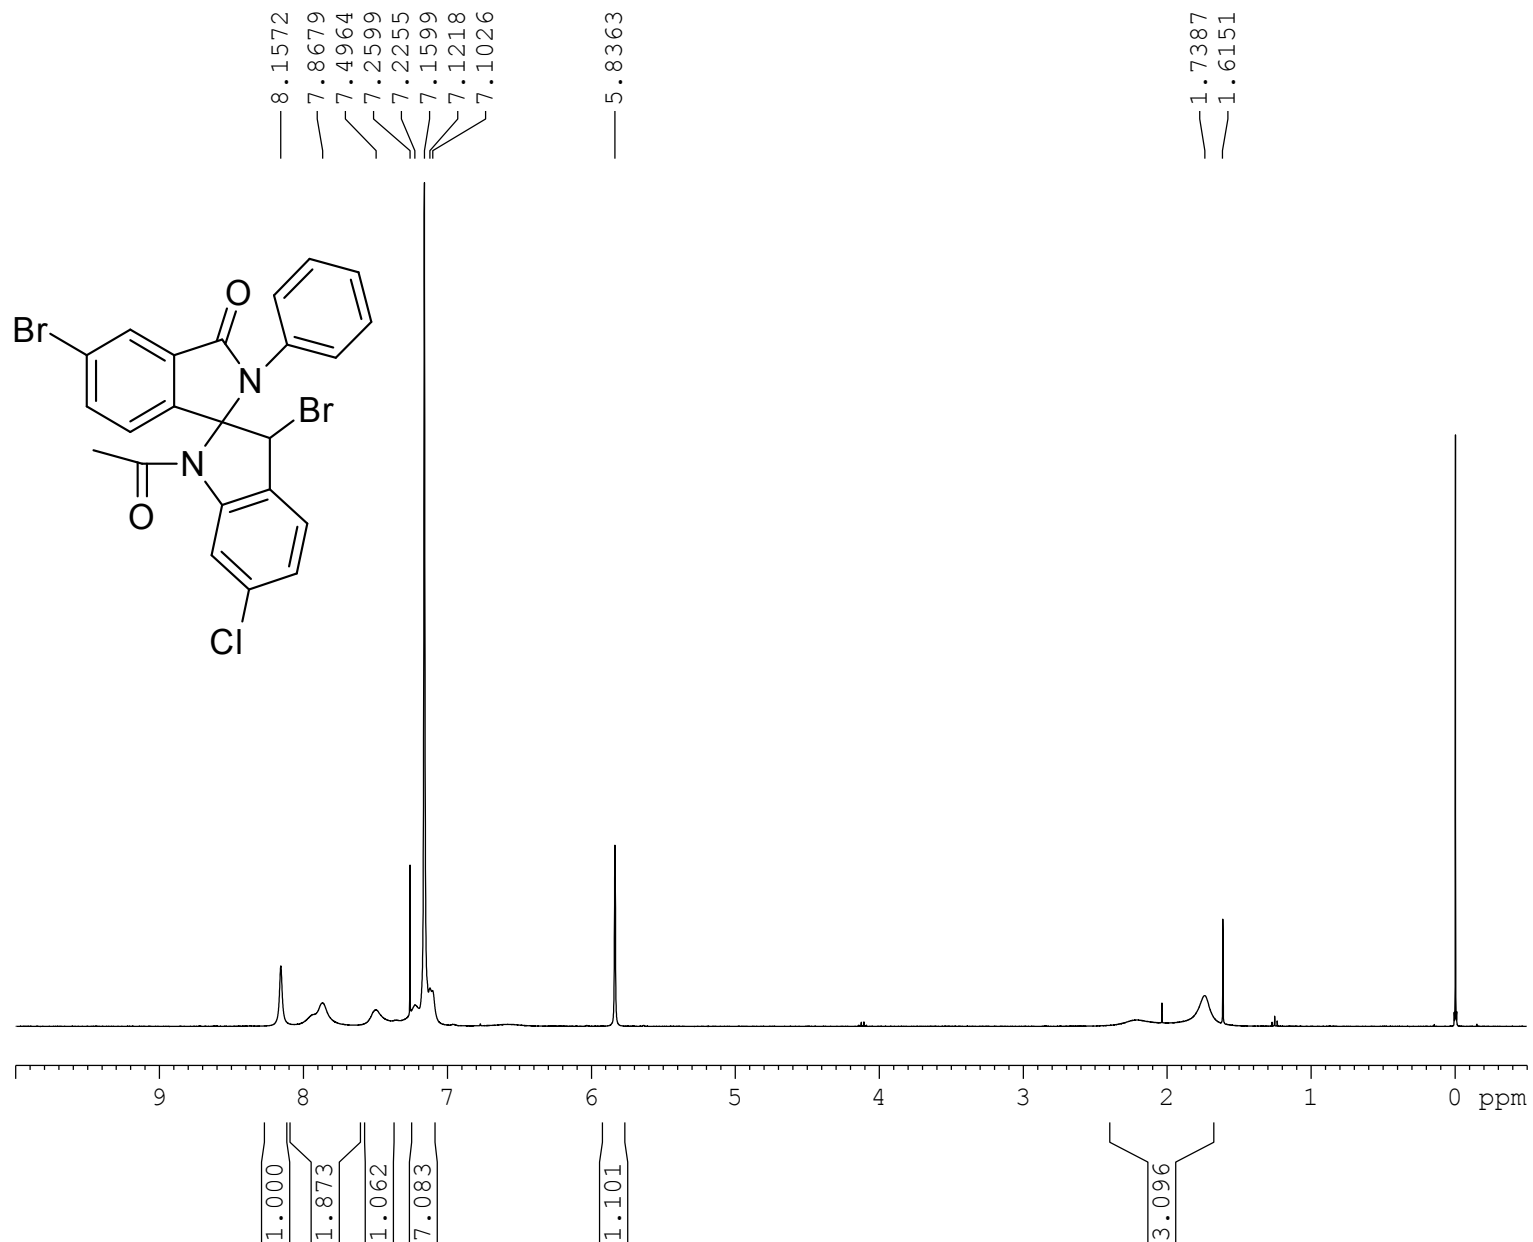

Current Data Parameters  
 NAME spiro1  
 EXPNO 6  
 PROCNO 1

F2 - Acquisition Parameters  
 Date\_ 20150902  
 Time 20.07  
 INSTRUM spect  
 PROBHD 5 mm PABBO BB/  
 PULPROG zg30  
 TD 32768  
 SOLVENT CDCl3  
 NS 16  
 DS 0  
 SWH 7211.539 Hz  
 FIDRES 0.220079 Hz  
 AQ 2.2719147 sec  
 RG 89.08  
 DW 69.333 usec  
 DE 10.50 usec  
 TE 298.3 K  
 D1 2.00000000 sec  
 TD0 1

===== CHANNEL f1 =====  
 SFO1 400.1324008 MHz  
 NUC1 1H  
 P1 12.90 usec  
 PLW1 15.00000000 W

F2 - Processing parameters  
 SI 16384  
 SF 400.1300098 MHz  
 WDW EM  
 SSB 0  
 LB 0 Hz  
 GB 0  
 PC 1.00

1-acetyl-3,5'-dibromo-6-chloro-2'-phenylspiro[indoline-2,1'-isoindolin]-3'-one (6m)

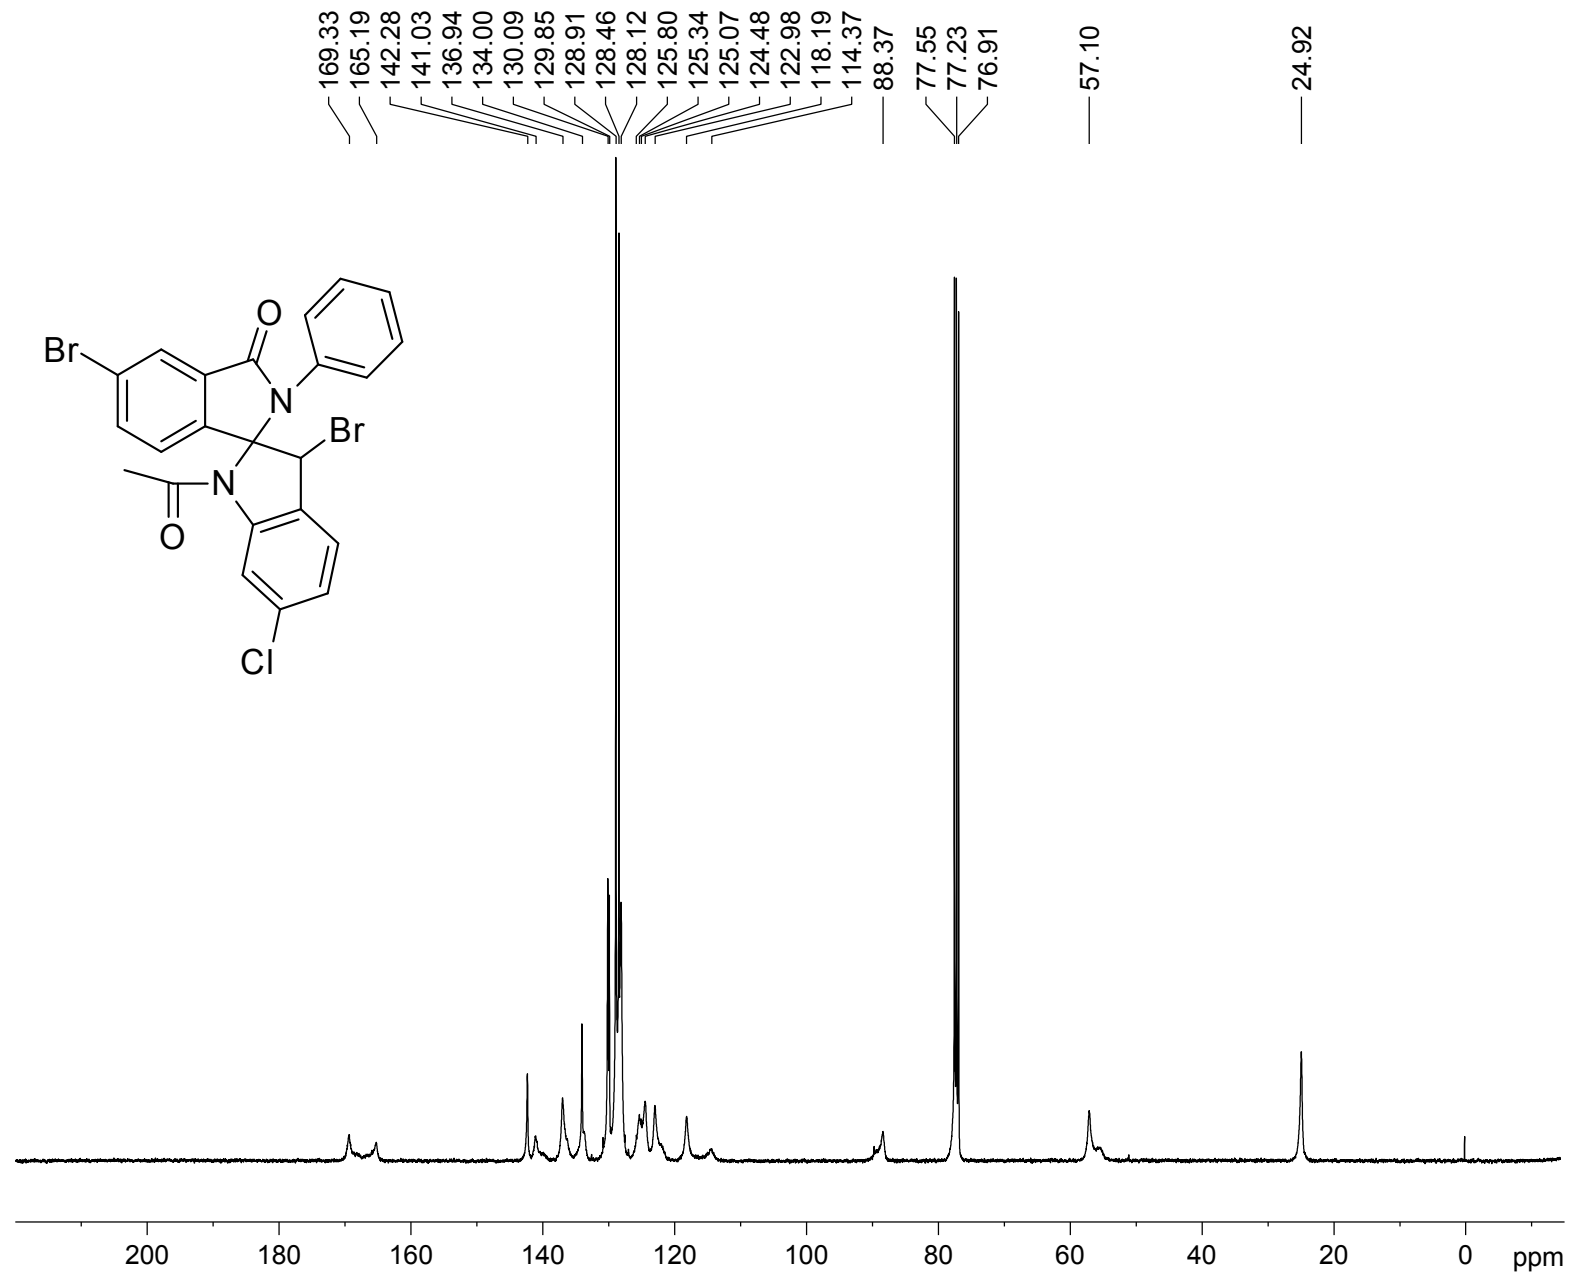

Current Data Parameters  
 NAME spiro1  
 EXPNO 54  
 PROCNO 1

F2 - Acquisition Parameters  
 Date\_ 20151223  
 Time 23.06  
 INSTRUM spect  
 PROBHD 5 mm PABBO BB/  
 PULPROG zgpg30  
 TD 32768  
 SOLVENT CDCl3  
 NS 10000  
 DS 0  
 SWH 24038.461 Hz  
 FIDRES 0.733596 Hz  
 AQ 0.6815744 sec  
 RG 198.09  
 DW 20.800 usec  
 DE 6.50 usec  
 TE 298.2 K  
 D1 2.00000000 sec  
 D11 0.03000000 sec  
 TD0 1

===== CHANNEL f1 =====  
 SFO1 100.6233319 MHz  
 NUC1 13C  
 P1 10.00 usec  
 PLW1 47.50000000 W

===== CHANNEL f2 =====  
 SFO2 400.1316005 MHz  
 NUC2 1H  
 CPDPRG[2] waltz16  
 PCPD2 90.00 usec  
 PLW2 15.00000000 W  
 PLW12 0.33750001 W  
 PLW13 0.27338001 W

F2 - Processing parameters  
 SI 32768  
 SF 100.6127621 MHz  
 WDW EM  
 SSB 0  
 LB 2.00 Hz  
 GB 0  
 PC 1.00

1-acetyl-3-bromo-5-chloro-2'-phenylspiro[indoline-2,1'-isoindolin]-3'-one (6n)

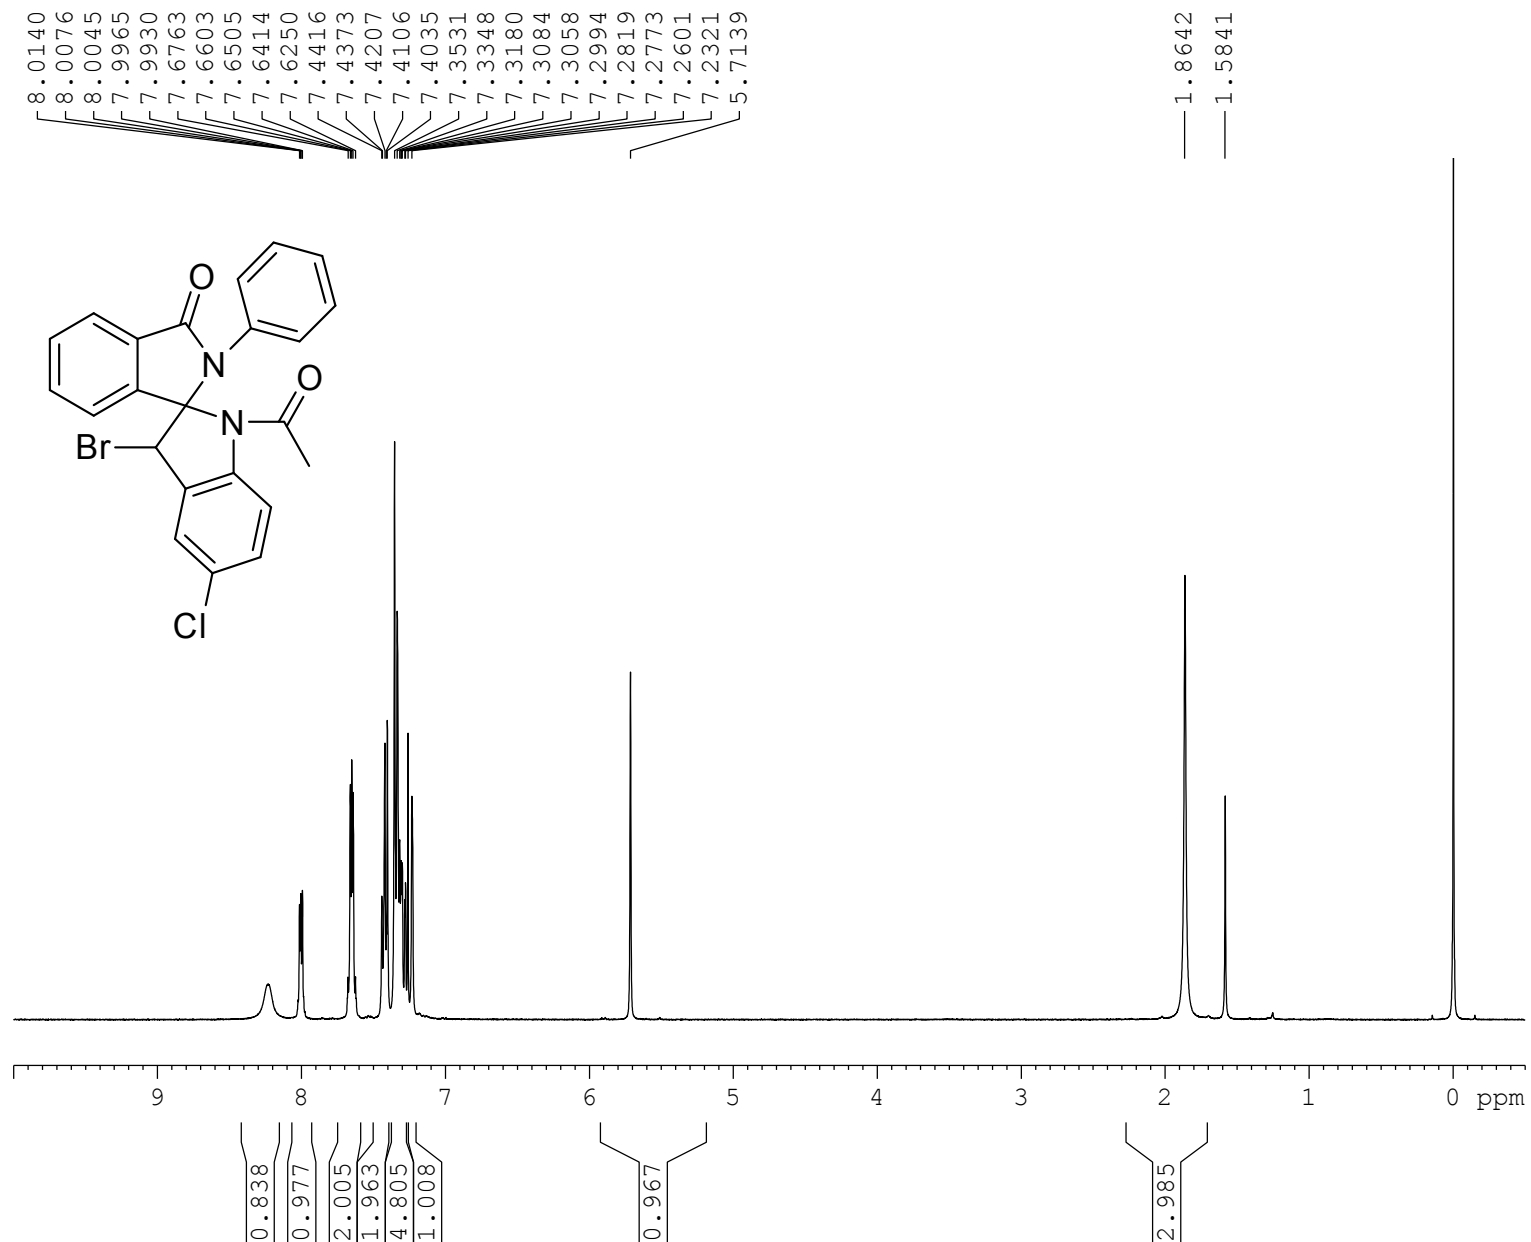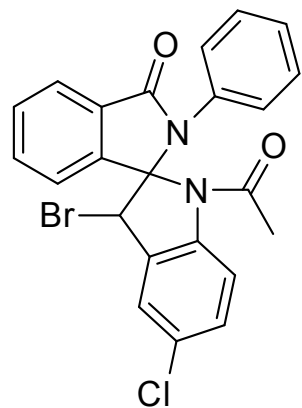

Current Data Parameters  
NAME spiro1  
EXPNO 16  
PROCNO 1

F2 - Acquisition Parameters  
Date\_ 20150904  
Time 14.20  
INSTRUM spect  
PROBHD 5 mm PABBO BB/  
PULPROG zg30  
TD 32768  
SOLVENT CDCl3  
NS 32  
DS 0  
SWH 7211.539 Hz  
FIDRES 0.220079 Hz  
AQ 2.2719147 sec  
RG 198.09  
DW 69.333 usec  
DE 10.50 usec  
TE 298.4 K  
D1 2.00000000 sec  
TD0 1

===== CHANNEL f1 =====  
SFO1 400.1324008 MHz  
NUC1 1H  
P1 12.90 usec  
PLW1 15.00000000 W

F2 - Processing parameters  
SI 16384  
SF 400.1300098 MHz  
WDW EM  
SSB 0  
LB 0 Hz  
GB 0  
PC 1.00

1-acetyl-3-bromo-5-chloro-2'-phenylspiro[indoline-2,1'-isoindolin]-3'-one (6n)

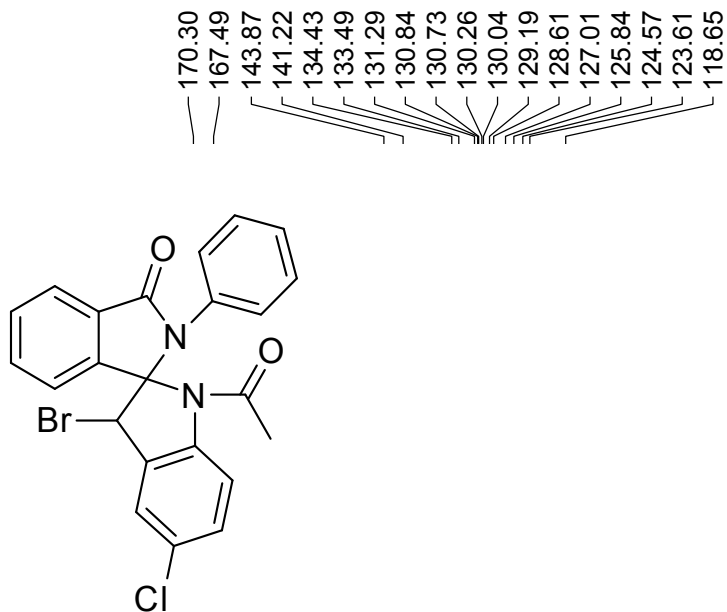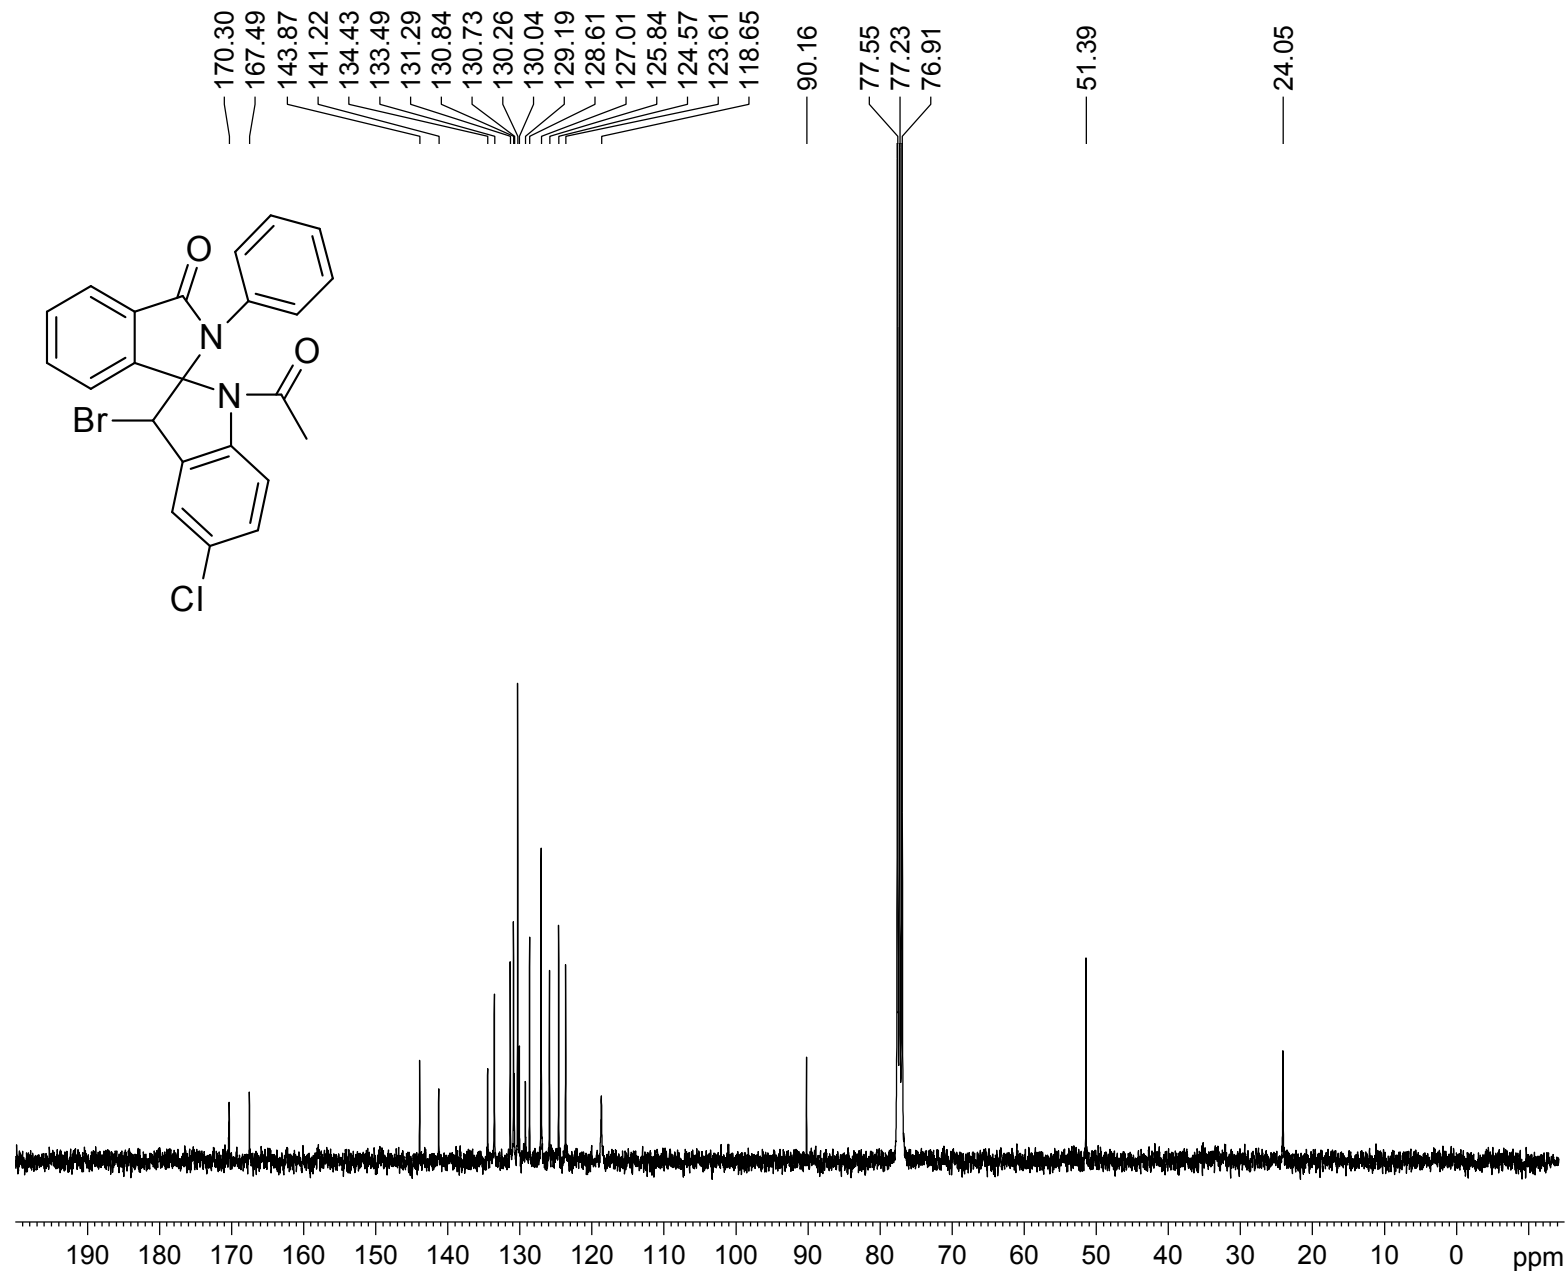

Current Data Parameters

NAME project 1  
EXPNO 44  
PROCNO 1

F2 - Acquisition Parameters

Date\_ 20150717  
Time 17.24  
INSTRUM spect  
PROBHD 5 mm PABBO BB/  
PULPROG zgpg30  
TD 32768  
SOLVENT CDCl3  
NS 1000  
DS 0  
SWH 24038.461 Hz  
FIDRES 0.733596 Hz  
AQ 0.6815744 sec  
RG 198.09  
DW 20.800 usec  
DE 6.50 usec  
TE 299.3 K  
D1 2.00000000 sec  
D11 0.03000000 sec  
TD0 1

===== CHANNEL f1 =====

SFO1 100.6233319 MHz  
NUC1 13C  
P1 10.00 usec  
PLW1 46.00000000 W

===== CHANNEL f2 =====

SFO2 400.1316005 MHz  
NUC2 1H  
CPDPRG[2] waltz16  
PCPD2 90.00 usec  
PLW2 15.00000000 W  
PLW12 0.34252000 W  
PLW13 0.27744001 W

F2 - Processing parameters

SI 32768  
SF 100.6127464 MHz  
WDW EM  
SSB 0  
LB 2.00 Hz  
GB 0  
PC 1.00

1-acetyl-3-bromo-5-chloro-2'-phenylspiro[indoline-2,1'-isoindolin]-3'-one (6n1)

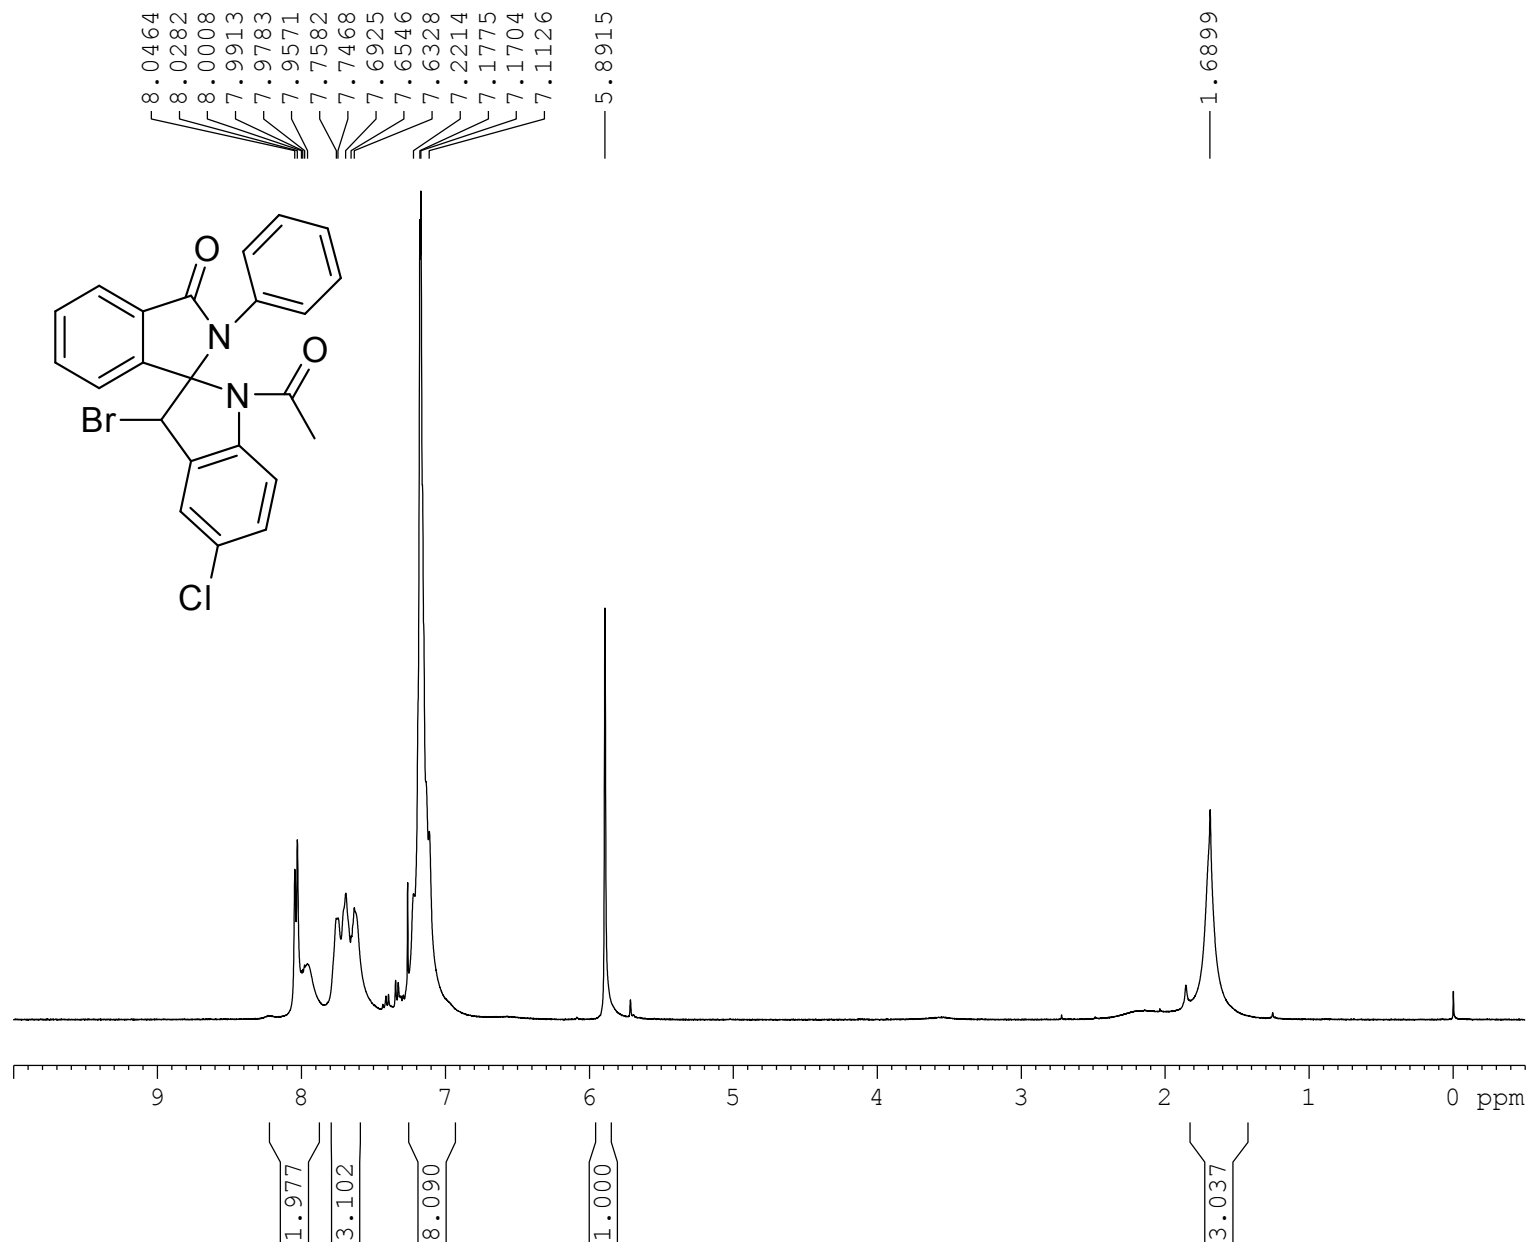

Current Data Parameters  
 NAME spiro  
 EXPNO 34  
 PROCNO 1

F2 - Acquisition Parameters  
 Date\_ 20160122  
 Time 13.15  
 INSTRUM spect  
 PROBHD 5 mm BBO BB-1H  
 PULPROG zg30  
 TD 32768  
 SOLVENT CDCl3  
 NS 16  
 DS 0  
 SWH 7246.377 Hz  
 FIDRES 0.221142 Hz  
 AQ 2.2609921 sec  
 RG 114  
 DW 69.000 usec  
 DE 6.50 usec  
 TE 297.9 K  
 D1 2.00000000 sec  
 TD0 1

===== CHANNEL f1 =====  
 NUC1 1H  
 P1 14.40 usec  
 PL1 1.80 dB  
 SFO1 400.1324008 MHz

F2 - Processing parameters  
 SI 16384  
 SF 400.1300088 MHz  
 WDW EM  
 SSB 0  
 LB 0 Hz  
 GB 0  
 PC 1.00

1-acetyl-3-bromo-5-chloro-2'-phenylspiro[indoline-2,1'-isoindolin]-3'-one (6n1)

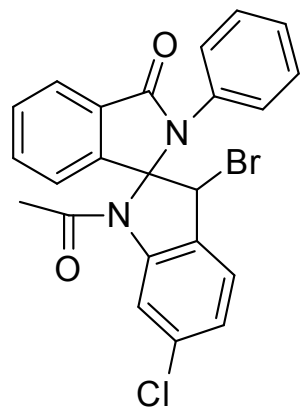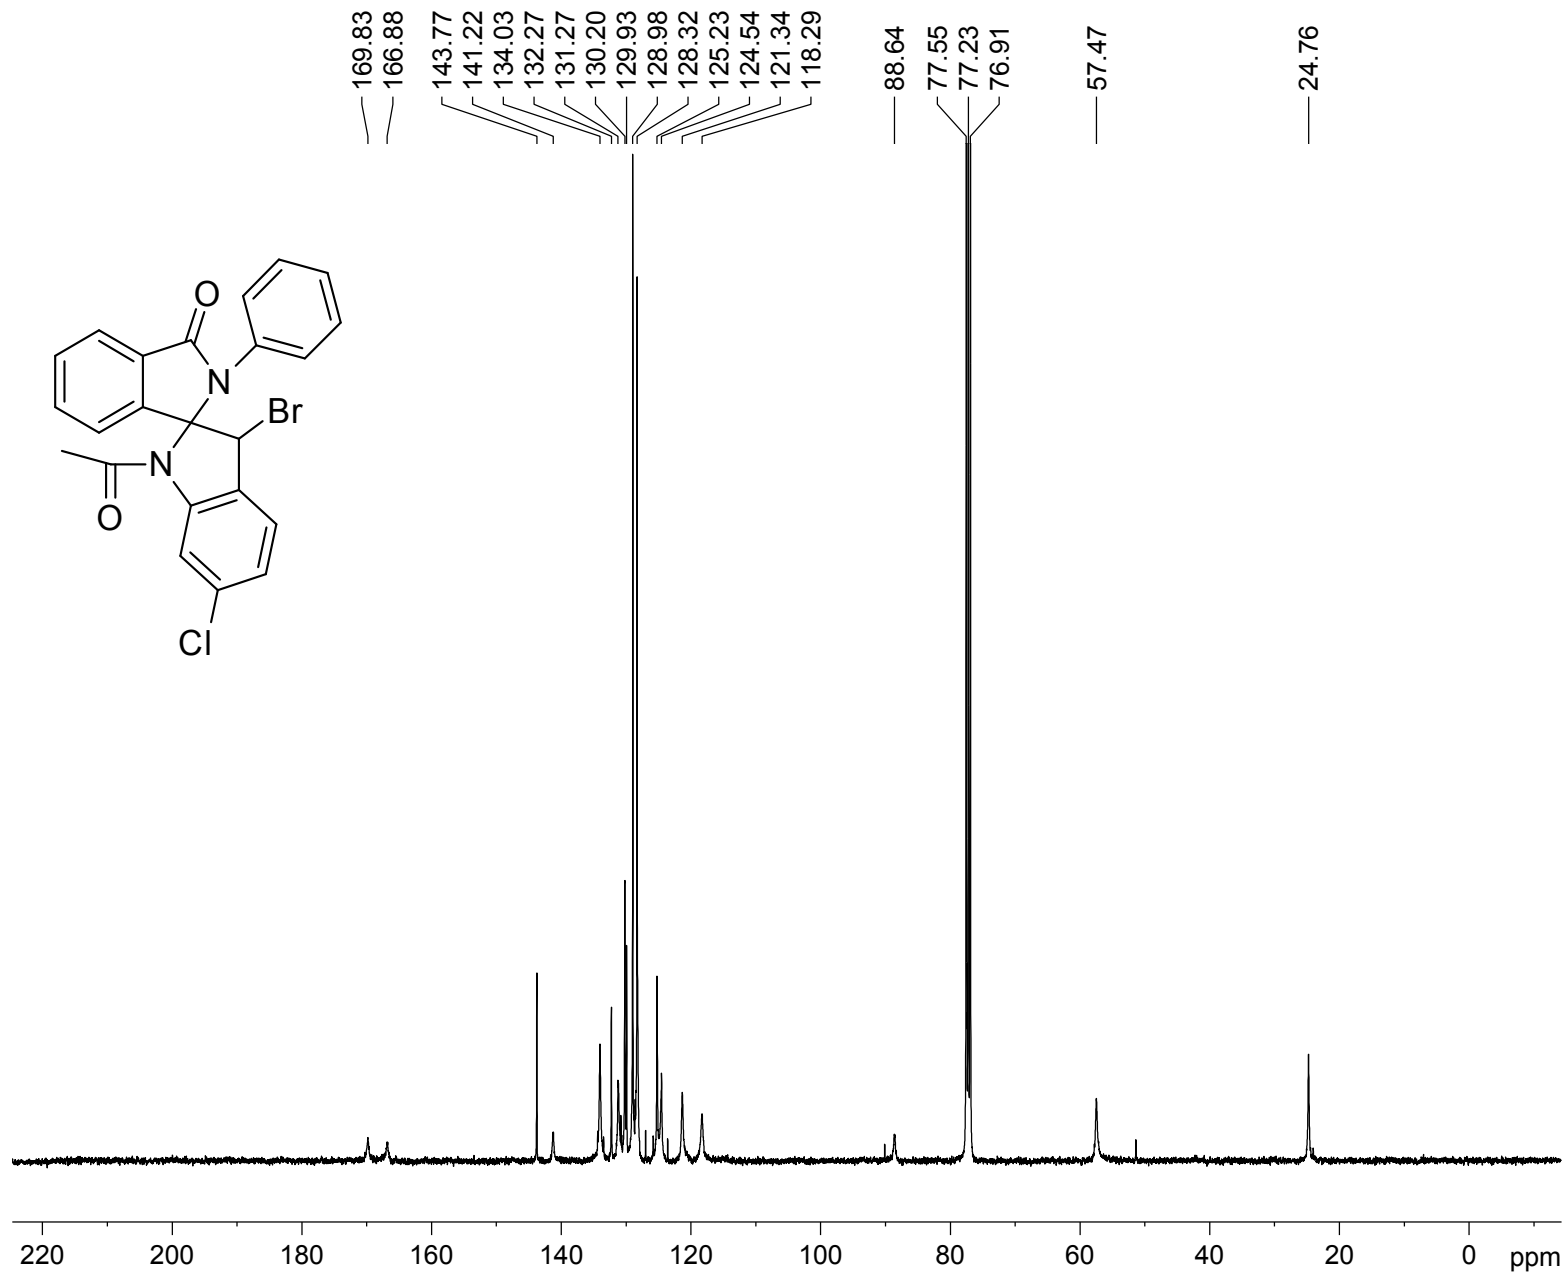

Current Data Parameters

NAME project 1  
EXPNO 66  
PROCNO 1

F2 - Acquisition Parameters

Date\_ 20150816  
Time 5.57  
INSTRUM spect  
PROBHD 5 mm PABBO BB/  
PULPROG zgpg30  
TD 32768  
SOLVENT CDCl3  
NS 12000  
DS 0  
SWH 24038.461 Hz  
FIDRES 0.733596 Hz  
AQ 0.6815744 sec  
RG 198.09  
DW 20.800 usec  
DE 6.50 usec  
TE 297.9 K  
D1 2.00000000 sec  
D11 0.03000000 sec  
TD0 1

===== CHANNEL f1 =====

SFO1 100.6233319 MHz  
NUC1 13C  
P1 10.00 usec  
PLW1 47.50000000 W

===== CHANNEL f2 =====

SFO2 400.1316005 MHz  
NUC2 1H  
CPDPRG[2] waltz16  
PCPD2 90.00 usec  
PLW2 15.00000000 W  
PLW12 0.33750001 W  
PLW13 0.27338001 W

F2 - Processing parameters

SI 32768  
SF 100.6127494 MHz  
WDW EM  
SSB 0  
LB 2.00 Hz  
GB 0  
PC 1.00



methyl 1-acetyl-6-methoxy-3'-oxo-2'-phenylspiro[indoline-2,1'-isoindoline]-3-carboxylate (6o)

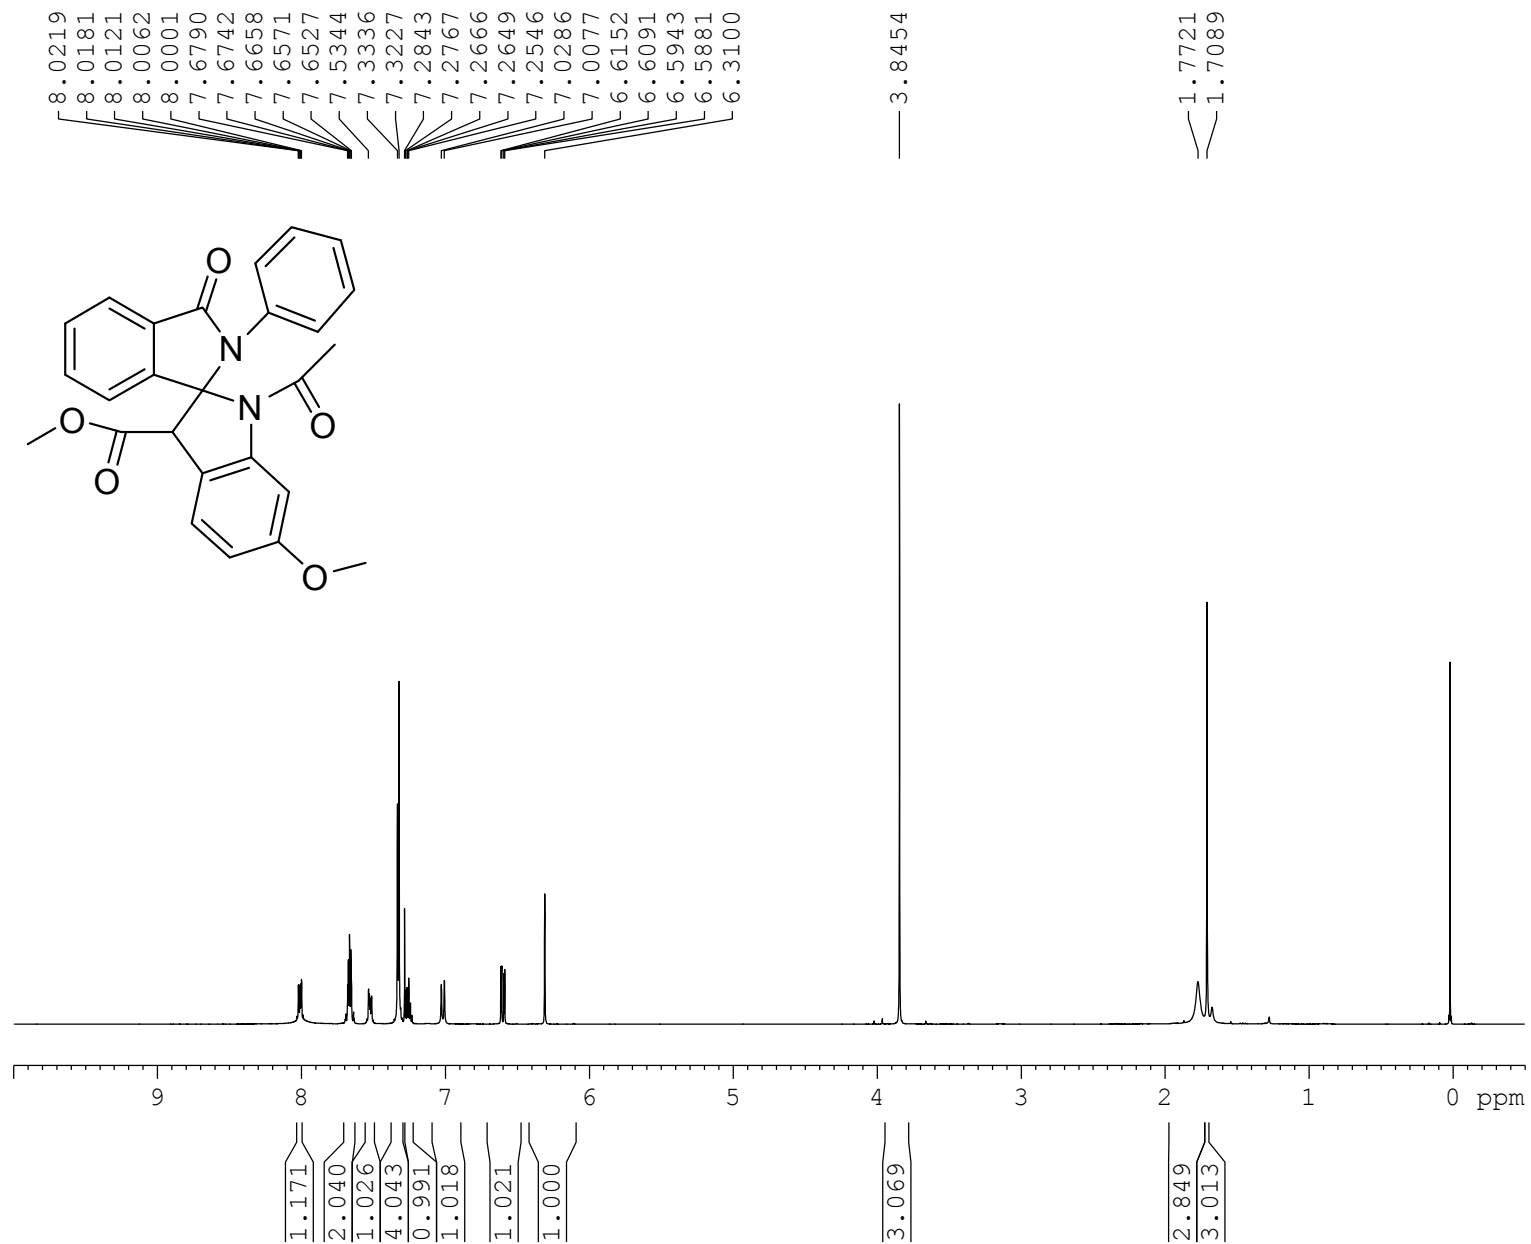

Current Data Parameters  
 NAME spiro1  
 EXPNO 14  
 PROCNO 1

F2 - Acquisition Parameters  
 Date\_ 20150903  
 Time 15.20  
 INSTRUM spect  
 PROBHD 5 mm PABBO BB/  
 PULPROG zg30  
 TD 32768  
 SOLVENT CDCl3  
 NS 32  
 DS 0  
 SWH 7211.539 Hz  
 FIDRES 0.220079 Hz  
 AQ 2.2719147 sec  
 RG 89.08  
 DW 69.333 usec  
 DE 10.50 usec  
 TE 298.2 K  
 D1 2.00000000 sec  
 TD0 1

===== CHANNEL f1 =====  
 SFO1 400.1324008 MHz  
 NUC1 1H  
 P1 12.90 usec  
 PLW1 15.00000000 W

F2 - Processing parameters  
 SI 16384  
 SF 400.1300000 MHz  
 WDW EM  
 SSB 0  
 LB 0 Hz  
 GB 0  
 PC 1.00

methyl 1-acetyl-6-methoxy-3'-oxo-2'-phenylspiro[indoline-2,1'-isoindoline]-3-carboxylate (6o)

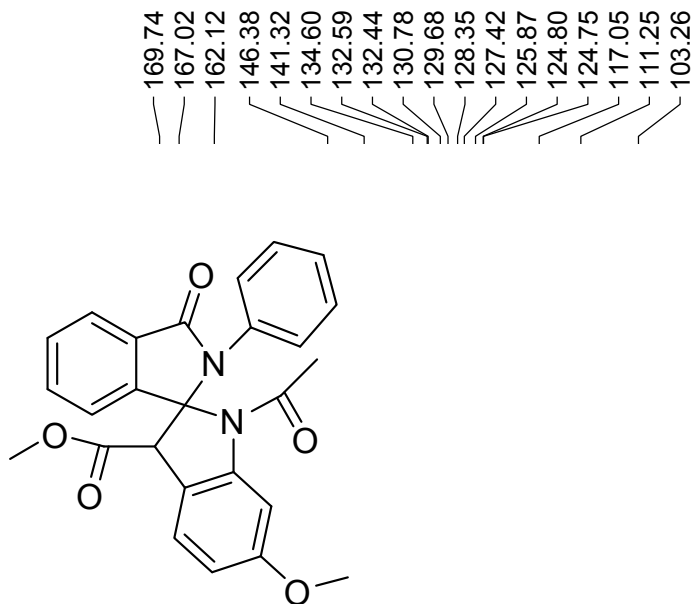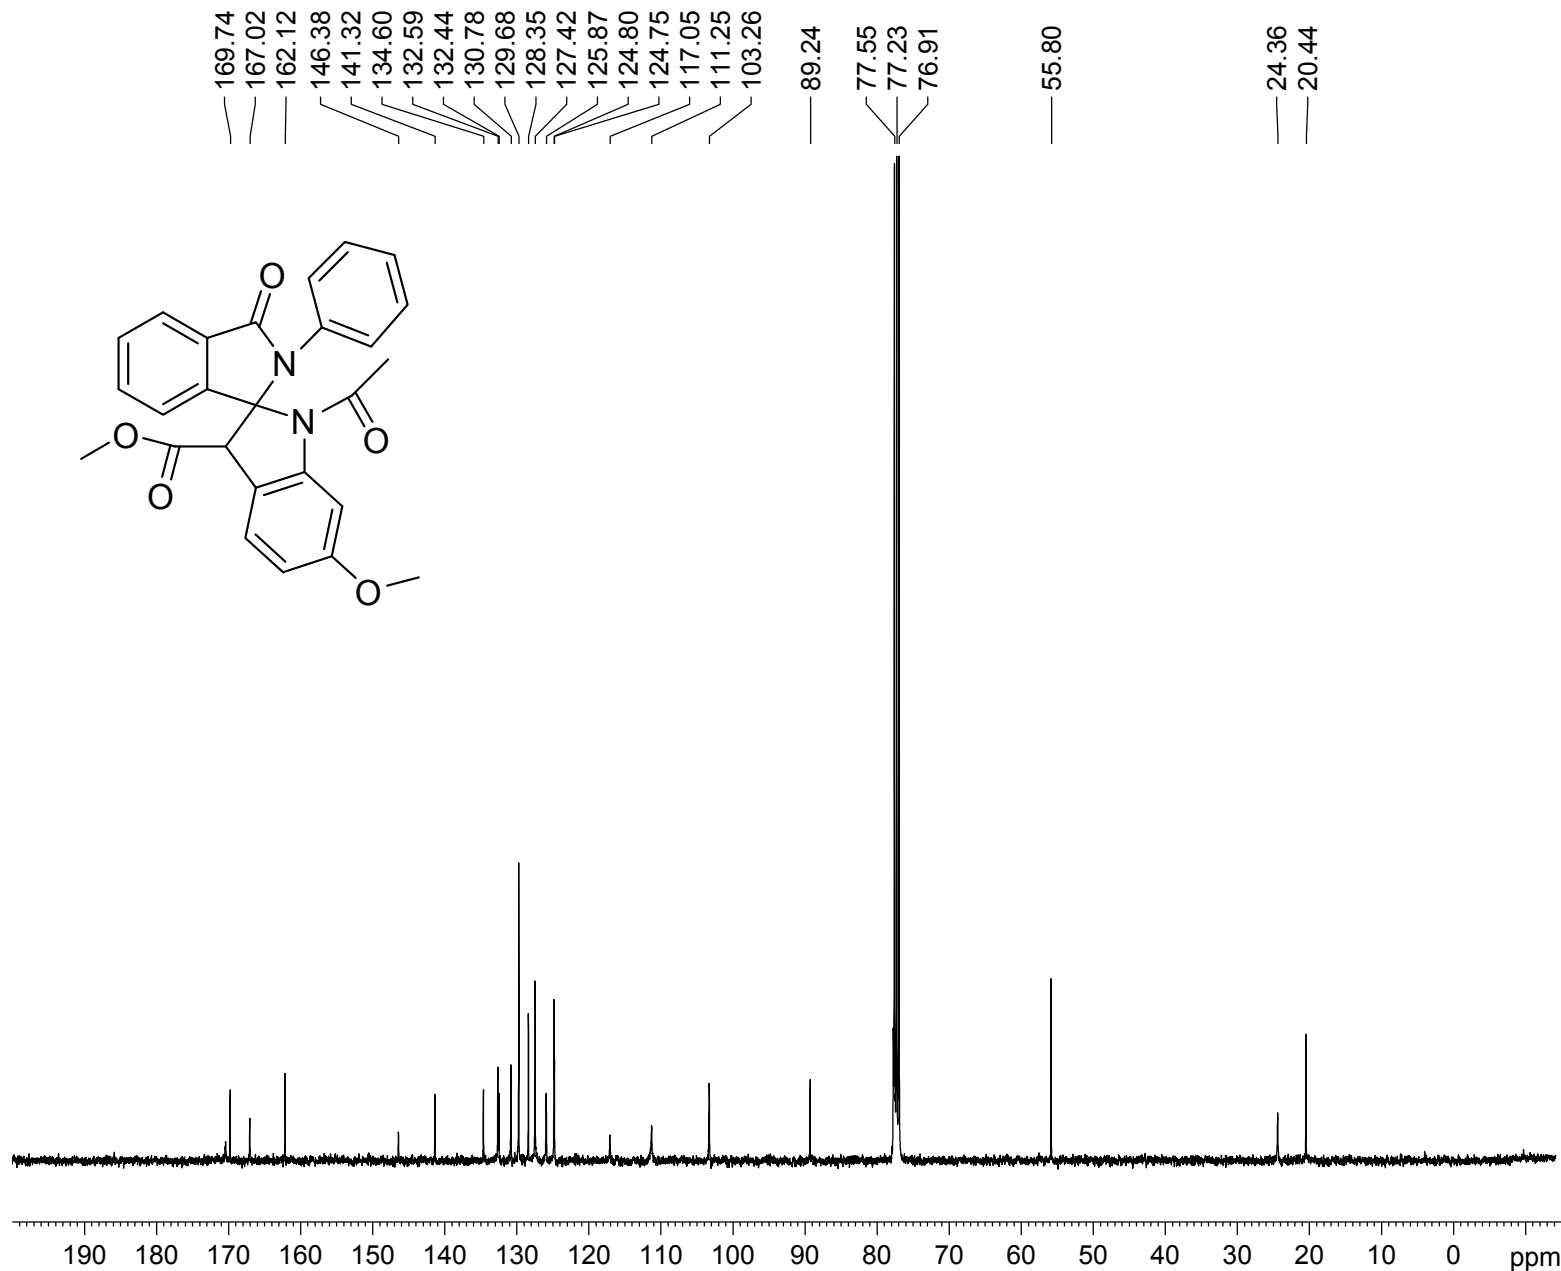

Current Data Parameters

NAME project 1  
 EXPNO 48  
 PROCNO 1

F2 - Acquisition Parameters

Date\_ 20150718  
 Time 22.04  
 INSTRUM spect  
 PROBHD 5 mm PABBO BB/  
 PULPROG zgpg30  
 TD 32768  
 SOLVENT CDCl3  
 NS 916  
 DS 0  
 SWH 24038.461 Hz  
 FIDRES 0.733596 Hz  
 AQ 0.6815744 sec  
 RG 198.09  
 DW 20.800 usec  
 DE 6.50 usec  
 TE 299.4 K  
 D1 2.00000000 sec  
 D11 0.03000000 sec  
 TD0 1

===== CHANNEL f1 =====

SFO1 100.6233319 MHz  
 NUC1 13C  
 P1 10.00 usec  
 PLW1 46.00000000 W

===== CHANNEL f2 =====

SFO2 400.1316005 MHz  
 NUC2 1H  
 CPDPRG[2] waltz16  
 PCPD2 90.00 usec  
 PLW2 15.00000000 W  
 PLW12 0.34252000 W  
 PLW13 0.27744001 W

F2 - Processing parameters

SI 32768  
 SF 100.6127478 MHz  
 WDW EM  
 SSB 0  
 LB 2.00 Hz  
 GB 0  
 PC 1.00

1-acetyl-2'-allyl-3-bromo-5-chlorospiro[indoline-2,1'-isoindolin]-3'-one (6p)

7.9500  
7.7103  
7.6922  
7.6695  
7.6513  
7.6330  
7.5563  
7.5380  
7.4069  
7.3761  
7.3741  
7.3707  
7.3688  
7.3541  
7.3521  
7.3488  
7.3468  
7.2675  
5.8307  
5.7298  
5.7194  
5.7175  
5.7120  
5.7075  
5.6997  
5.6951  
5.6897  
5.6878  
5.6773  
5.6748  
4.9896  
4.9646  
4.7290  
4.6864  
4.6445  
4.6409  
4.6373  
4.6324  
4.6286  
4.6253  
4.6060  
4.6024  
4.5988  
4.5939  
4.5901  
4.5869  
3.1566  
3.1345  
3.1181  
3.0960  
1.6655  
1.5044

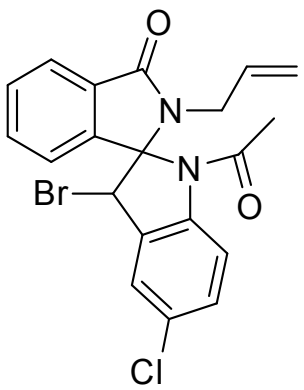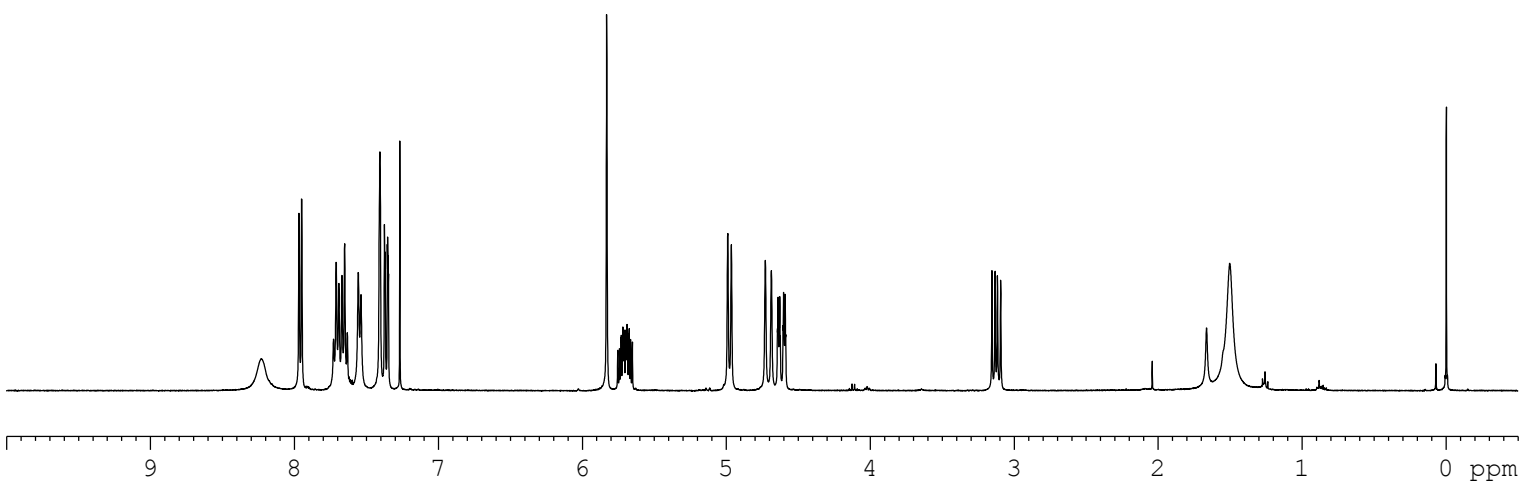

0.867  
1.007  
2.043  
1.017  
2.019  
1.000  
1.003  
1.026  
2.066  
1.025  
2.817

Current Data Parameters  
NAME spiro1  
EXPNO 37  
PROCNO 1

F2 - Acquisition Parameters  
Date\_ 20150918  
Time 19.16  
INSTRUM spect  
PROBHD 5 mm PABBO BB/  
PULPROG zg30  
TD 32768  
SOLVENT CDCl3  
NS 16  
DS 0  
SWH 7211.539 Hz  
FIDRES 0.220079 Hz  
AQ 2.2719147 sec  
RG 144.49  
DW 69.333 usec  
DE 10.50 usec  
TE 298.4 K  
D1 2.00000000 sec  
TD0 1

===== CHANNEL f1 =====  
SFO1 400.1324008 MHz  
NUC1 1H  
P1 12.90 usec  
PLW1 15.00000000 W

F2 - Processing parameters  
SI 16384  
SF 400.1300068 MHz  
WDW EM  
SSB 0  
LB 0 Hz  
GB 0  
PC 1.00

1-acetyl-2'-allyl-3-bromo-5-chlorospiro[indoline-2,1'-isoindolin]-3'-one (6p)

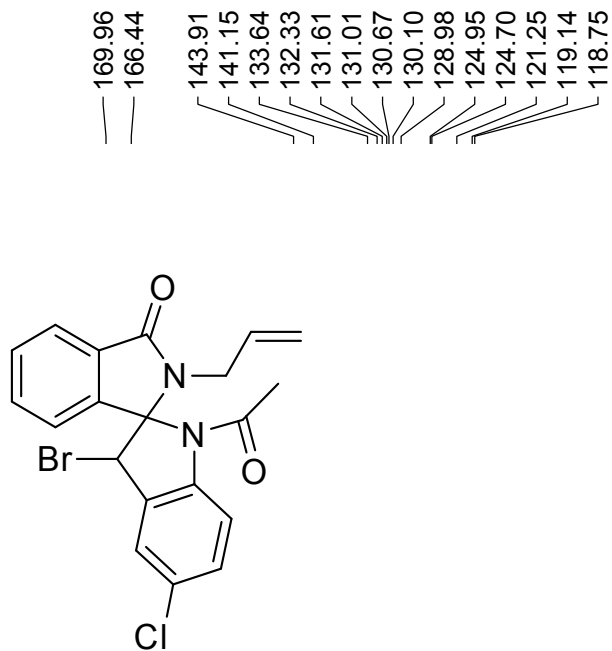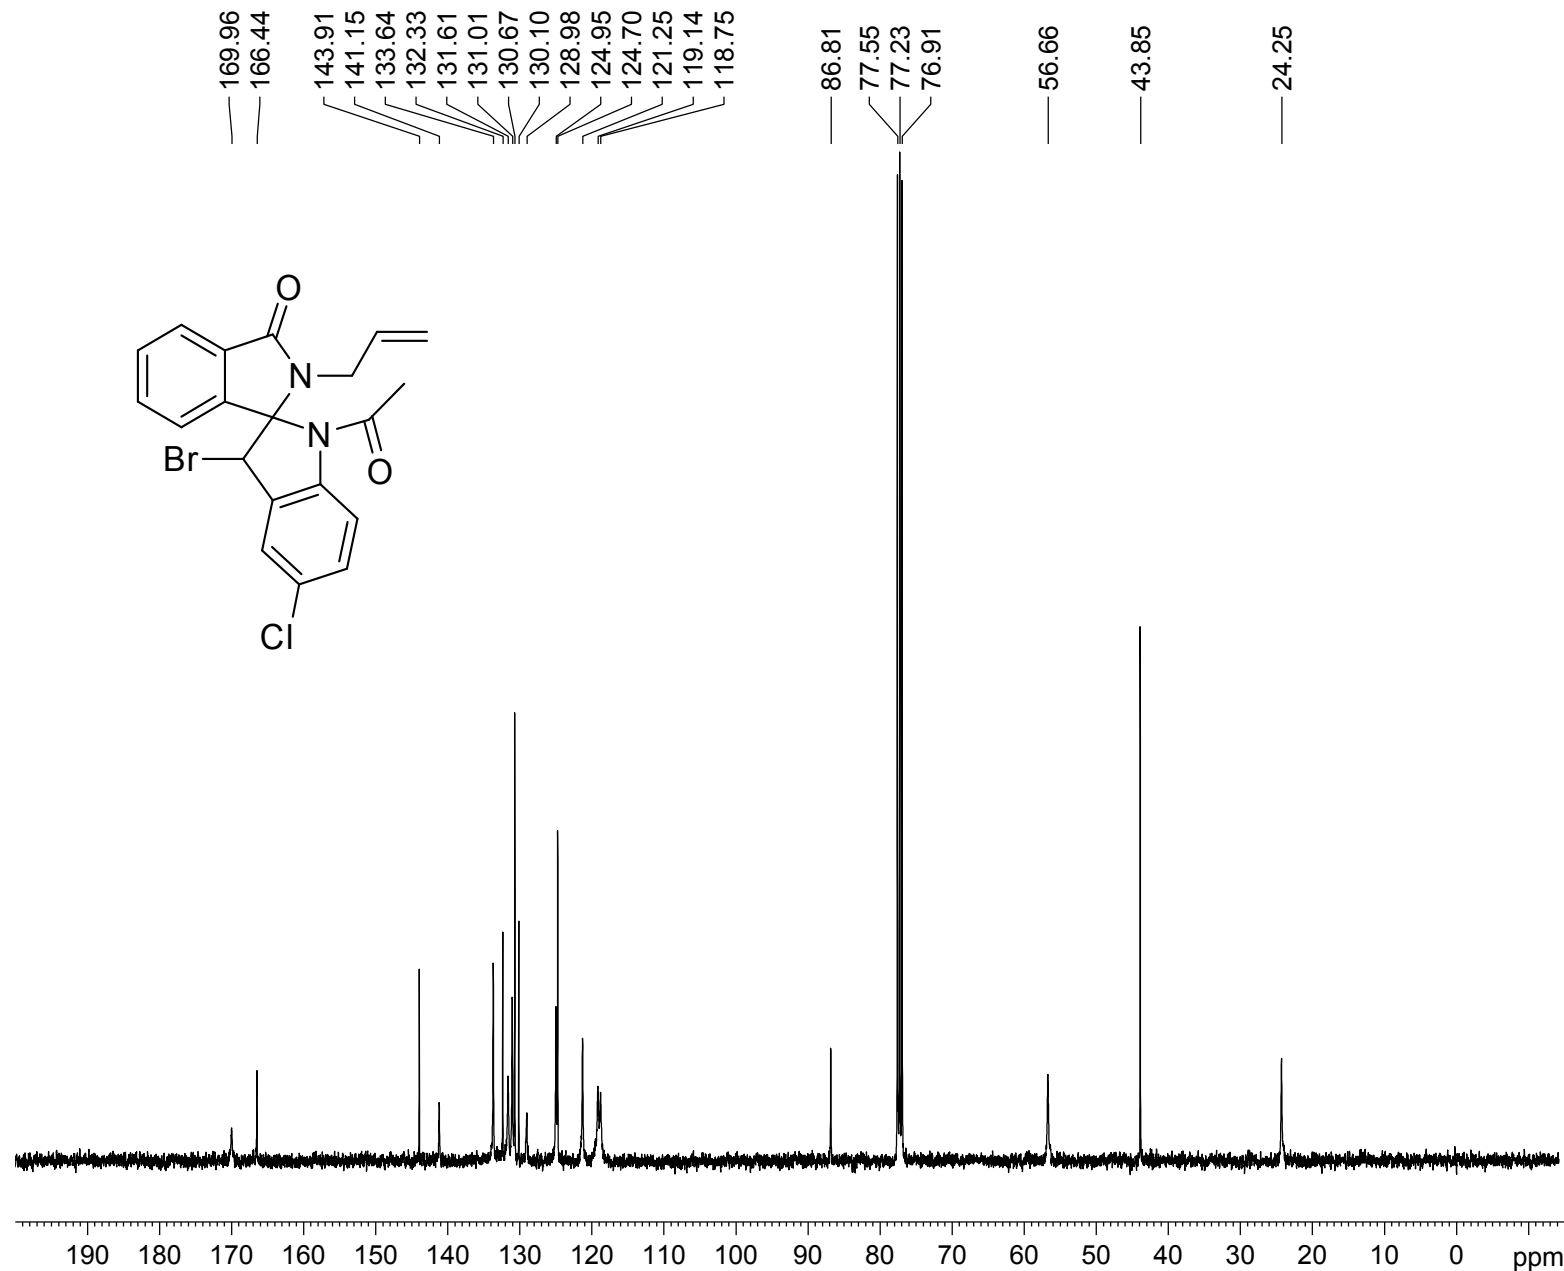

Current Data Parameters  
 NAME spiro1  
 EXPNO 38  
 PROCNO 1

F2 - Acquisition Parameters  
 Date\_ 20150920  
 Time 0.42  
 INSTRUM spect  
 PROBHD 5 mm PABBO BB/  
 PULPROG zgpg30  
 TD 32768  
 SOLVENT CDCl3  
 NS 351  
 DS 0  
 SWH 24038.461 Hz  
 FIDRES 0.733596 Hz  
 AQ 0.6815744 sec  
 RG 198.09  
 DW 20.800 usec  
 DE 6.50 usec  
 TE 298.0 K  
 D1 2.00000000 sec  
 D11 0.03000000 sec  
 TD0 1

===== CHANNEL f1 =====  
 SFO1 100.6233319 MHz  
 NUC1 13C  
 P1 10.00 usec  
 PLW1 47.50000000 W

===== CHANNEL f2 =====  
 SFO2 400.1316005 MHz  
 NUC2 1H  
 CPDPRG[2] waltz16  
 PCPD2 90.00 usec  
 PLW2 15.00000000 W  
 PLW12 0.33750001 W  
 PLW13 0.27338001 W

F2 - Processing parameters  
 SI 32768  
 SF 100.6127515 MHz  
 WDW EM  
 SSB 0  
 LB 2.00 Hz  
 GB 0  
 PC 1.00

N-methyl-2-(2-phenyl-1H-indol-1-yl)benzamide (8a)

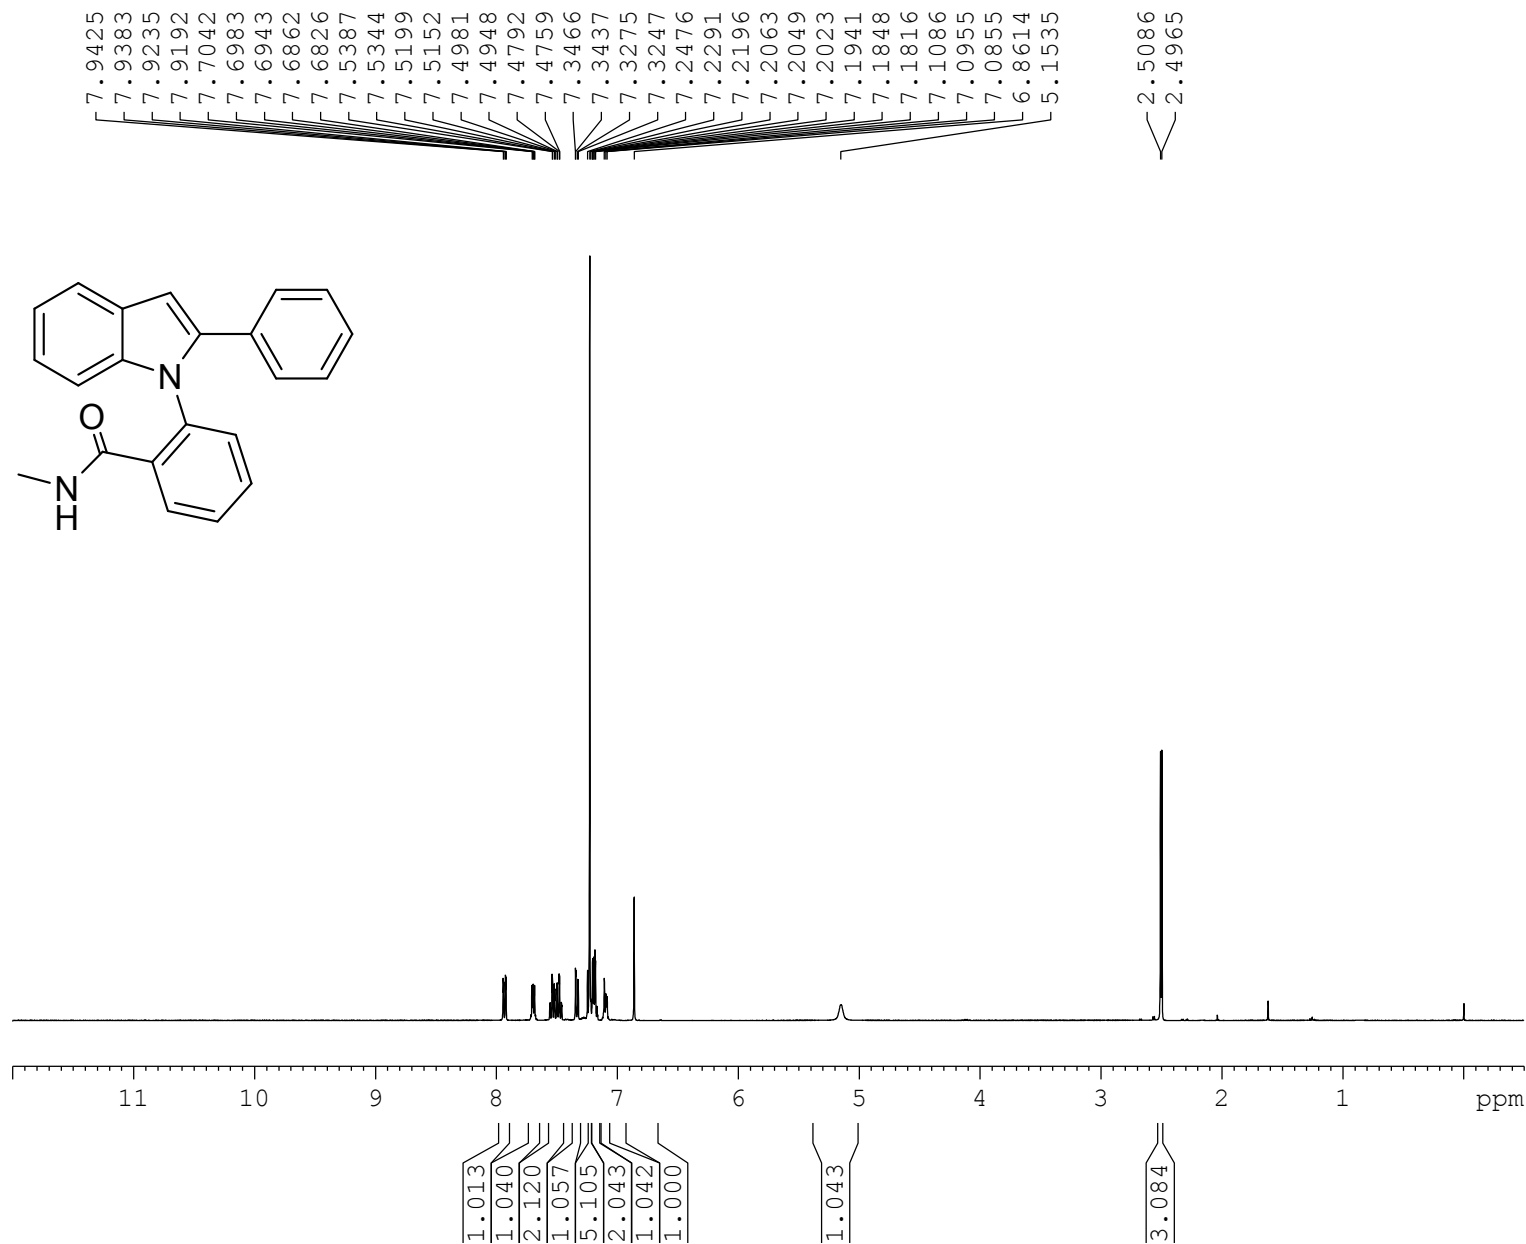

Current Data Parameters  
 NAME spiro1  
 EXPNO 180  
 PROCNO 1

F2 - Acquisition Parameters  
 Date\_ 20160209  
 Time 20.03  
 INSTRUM spect  
 PROBHD 5 mm PABBO BB/  
 PULPROG zg30  
 TD 32768  
 SOLVENT CDCl3  
 NS 32  
 DS 0  
 SWH 7211.539 Hz  
 FIDRES 0.220079 Hz  
 AQ 2.2719147 sec  
 RG 89.08  
 DW 69.333 usec  
 DE 10.50 usec  
 TE 297.1 K  
 D1 2.00000000 sec  
 TD0 1

===== CHANNEL f1 =====  
 SFO1 400.1324008 MHz  
 NUC1 1H  
 P1 12.90 usec  
 PLW1 15.00000000 W

F2 - Processing parameters  
 SI 16384  
 SF 400.1300147 MHz  
 WDW EM  
 SSB 0  
 LB 0 Hz  
 GB 0  
 PC 1.00

N-methyl-2-(2-phenyl-1H-indol-1-yl)benzamide (8a)

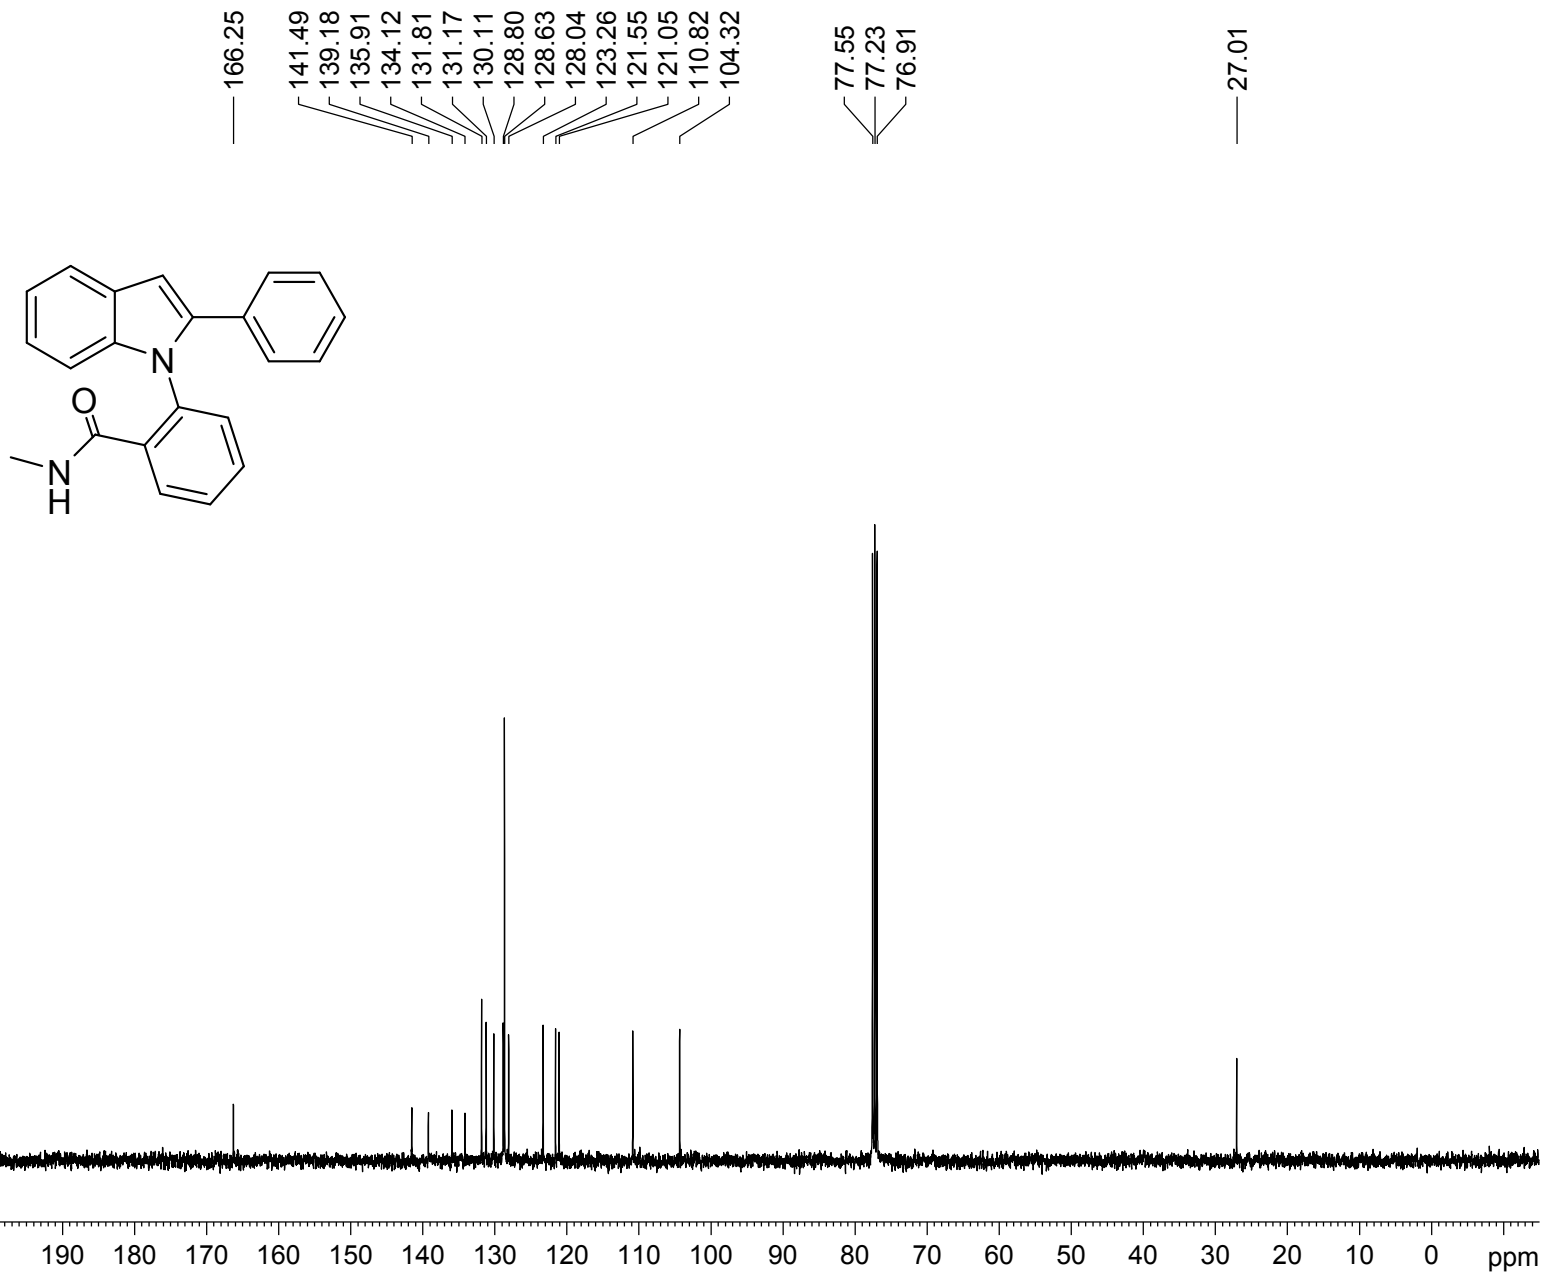

Current Data Parameters

NAME spiro1  
EXPNO 181  
PROCNO 1

F2 - Acquisition Parameters

Date\_ 20160209  
Time 20.07  
INSTRUM spect  
PROBHD 5 mm PABBO BB/  
PULPROG zgpg30  
TD 32768  
SOLVENT CDCl3  
NS 57  
DS 0  
SWH 24038.461 Hz  
FIDRES 0.733596 Hz  
AQ 0.6815744 sec  
RG 198.09  
DW 20.800 usec  
DE 6.50 usec  
TE 297.3 K  
D1 2.00000000 sec  
D11 0.03000000 sec  
TD0 1

==== CHANNEL f1 =====

SFO1 100.6228298 MHz  
NUC1 13C  
P1 10.00 usec  
PLW1 47.50000000 W

==== CHANNEL f2 =====

SFO2 400.1316005 MHz  
NUC2 1H  
CPDPRG[2] waltz16  
PCPD2 90.00 usec  
PLW2 15.00000000 W  
PLW12 0.33750001 W  
PLW13 0.27338001 W

F2 - Processing parameters

SI 32768  
SF 100.6127512 MHz  
WDW EM  
SSB 0  
LB 2.00 Hz  
GB 0  
PC 1.00

N-phenyl-2-(2-phenyl-1H-indol-1-yl)benzamide (8b)

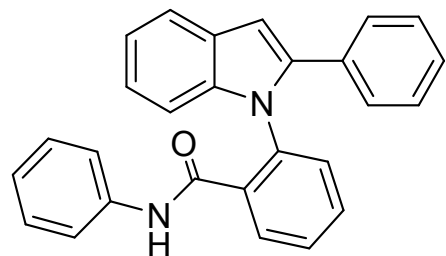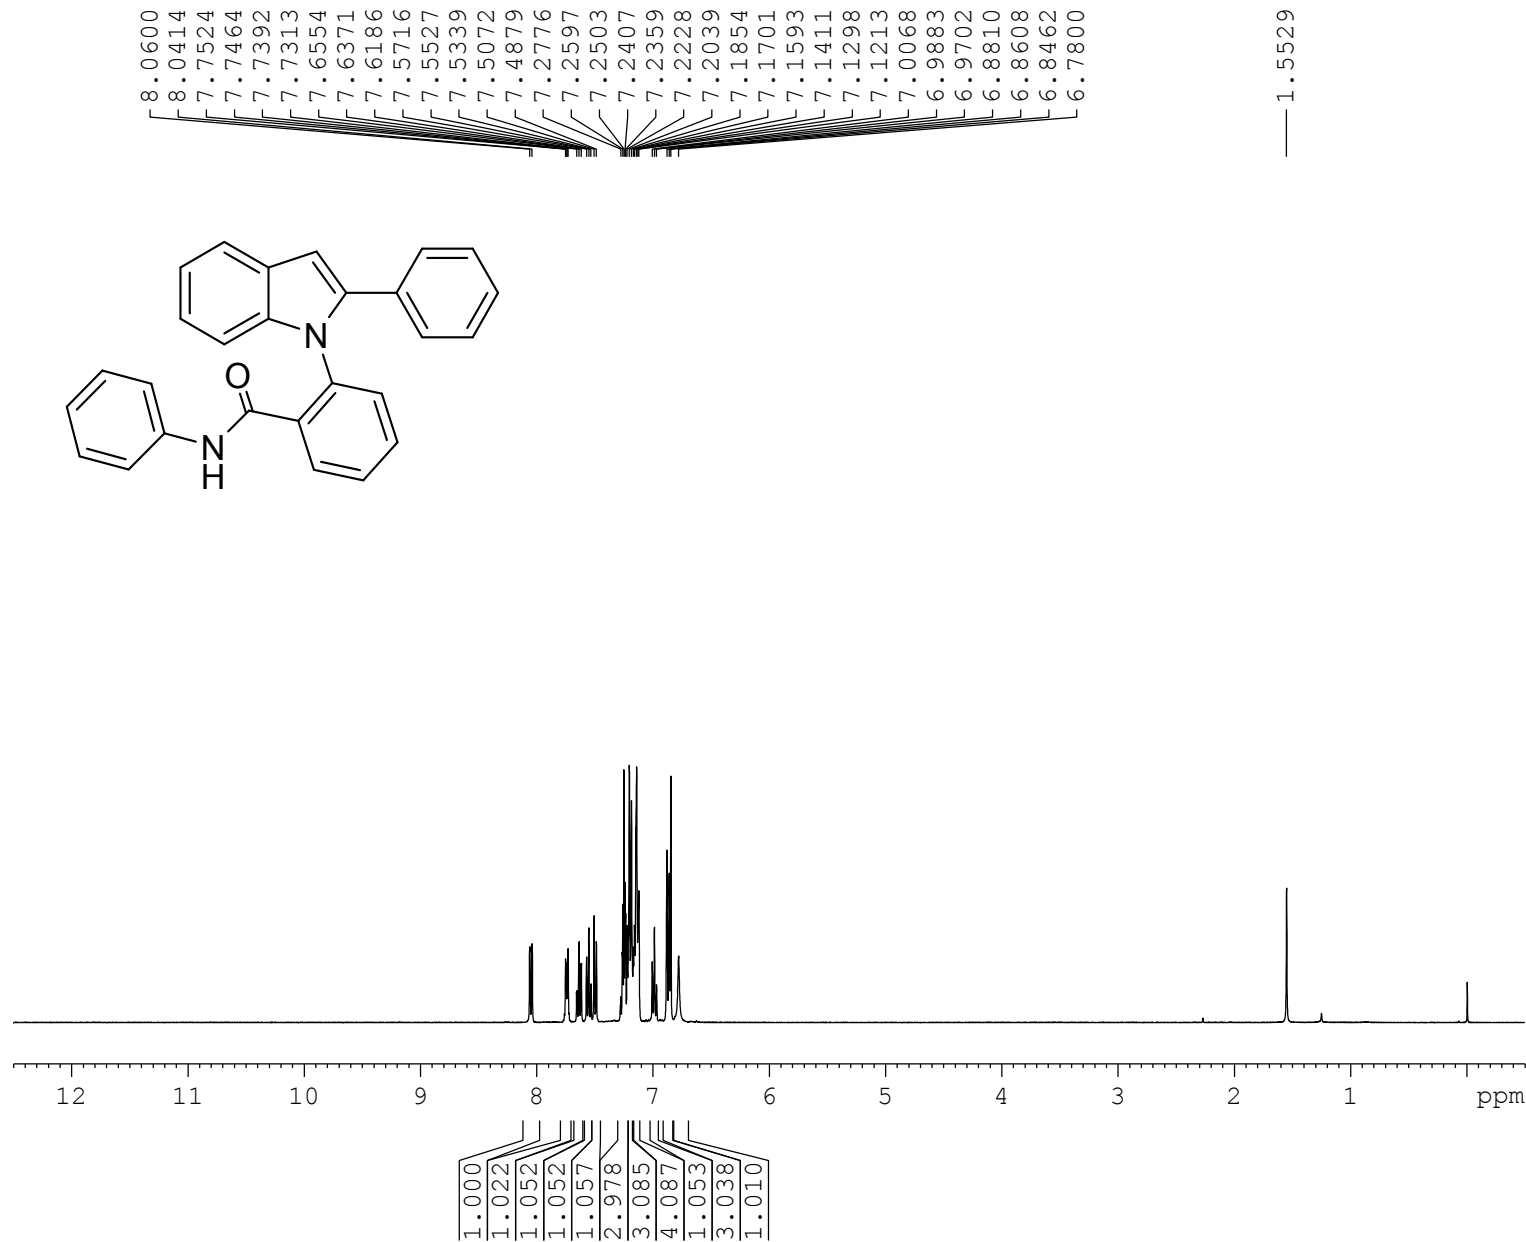

Current Data Parameters  
 NAME spiro1  
 EXPNO 174  
 PROCNO 1

F2 - Acquisition Parameters  
 Date\_ 20160209  
 Time 19.25  
 INSTRUM spect  
 PROBHD 5 mm PABBO BB/  
 PULPROG zg30  
 TD 32768  
 SOLVENT CDCl3  
 NS 32  
 DS 0  
 SWH 7211.539 Hz  
 FIDRES 0.220079 Hz  
 AQ 2.2719147 sec  
 RG 113.31  
 DW 69.333 usec  
 DE 10.50 usec  
 TE 297.1 K  
 D1 2.00000000 sec  
 TD0 1

==== CHANNEL f1 =====  
 SFO1 400.1324008 MHz  
 NUC1 1H  
 P1 12.90 usec  
 PLW1 15.00000000 W

F2 - Processing parameters  
 SI 16384  
 SF 400.1300138 MHz  
 WDW EM  
 SSB 0  
 LB 0 Hz  
 GB 0  
 PC 1.00

N-phenyl-2-(2-phenyl-1H-indol-1-yl)benzamide (8b)

163.10  
141.85  
138.88  
137.73  
135.69  
134.35  
132.35  
131.85  
131.45  
130.33  
129.20  
128.88  
128.63  
128.23  
124.40  
123.61  
121.99  
121.28  
119.92  
110.76  
104.70  
77.55  
77.23  
76.91

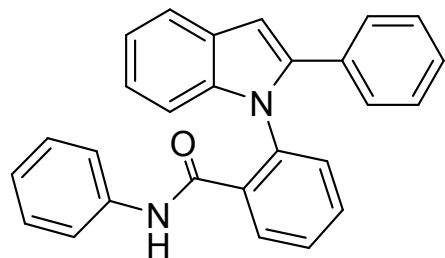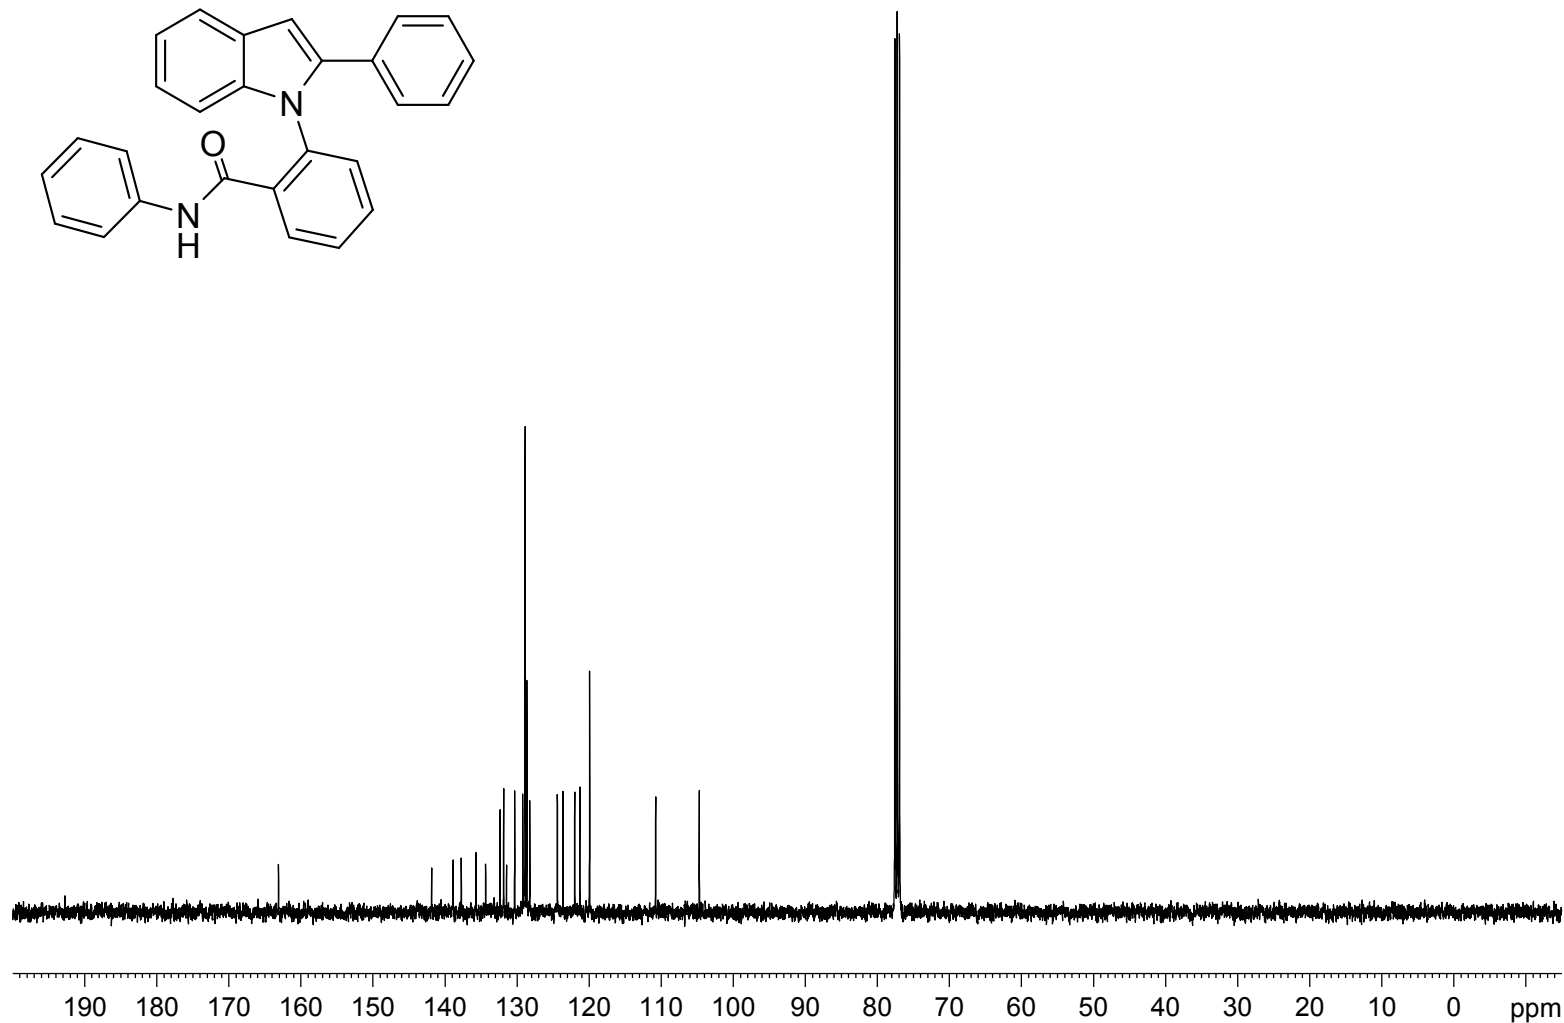

Current Data Parameters

NAME spiro1  
EXPNO 175  
PROCNO 1

F2 - Acquisition Parameters

Date\_ 20160209  
Time 19.28  
INSTRUM spect  
PROBHD 5 mm PABBO BB/  
PULPROG zgpg30  
TD 32768  
SOLVENT CDCl3  
NS 224  
DS 0  
SWH 24038.461 Hz  
FIDRES 0.733596 Hz  
AQ 0.6815744 sec  
RG 198.09  
DW 20.800 usec  
DE 6.50 usec  
TE 297.1 K  
D1 2.0000000 sec  
D11 0.03000000 sec  
TD0 1

==== CHANNEL f1 =====

SFO1 100.6228298 MHz  
NUC1 13C  
P1 10.00 usec  
PLW1 47.50000000 W

==== CHANNEL f2 =====

SFO2 400.1316005 MHz  
NUC2 1H  
CPDPRG[2] waltz16  
PCPD2 90.00 usec  
PLW2 15.00000000 W  
PLW12 0.33750001 W  
PLW13 0.27338001 W

F2 - Processing parameters

SI 32768  
SF 100.6127482 MHz  
WDW EM  
SSB 0  
LB 2.00 Hz  
GB 0  
PC 1.00



2-(2-phenyl-1H-indol-1-yl)-N-(o-tolyl)benzamide (8c)

8.1591  
8.1548  
8.1533  
8.1410  
8.1356  
7.7904  
7.7702  
7.6768  
7.6714  
7.6628  
7.6555  
7.6527  
7.5940  
7.5895  
7.5756  
7.5709  
7.5588  
7.5544  
7.5526  
7.5412  
7.5372  
7.5225  
7.5193  
7.3146  
7.3103  
7.2959  
7.2924  
7.2513  
7.2313  
7.2068  
7.1985  
7.1363  
7.1306  
7.1151  
7.0999  
7.0939  
6.9543  
6.9355  
6.9216  
6.9188  
6.9051  
6.8378

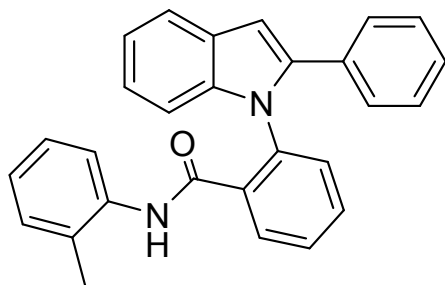

Molecular Weight: 402.49

1.2654

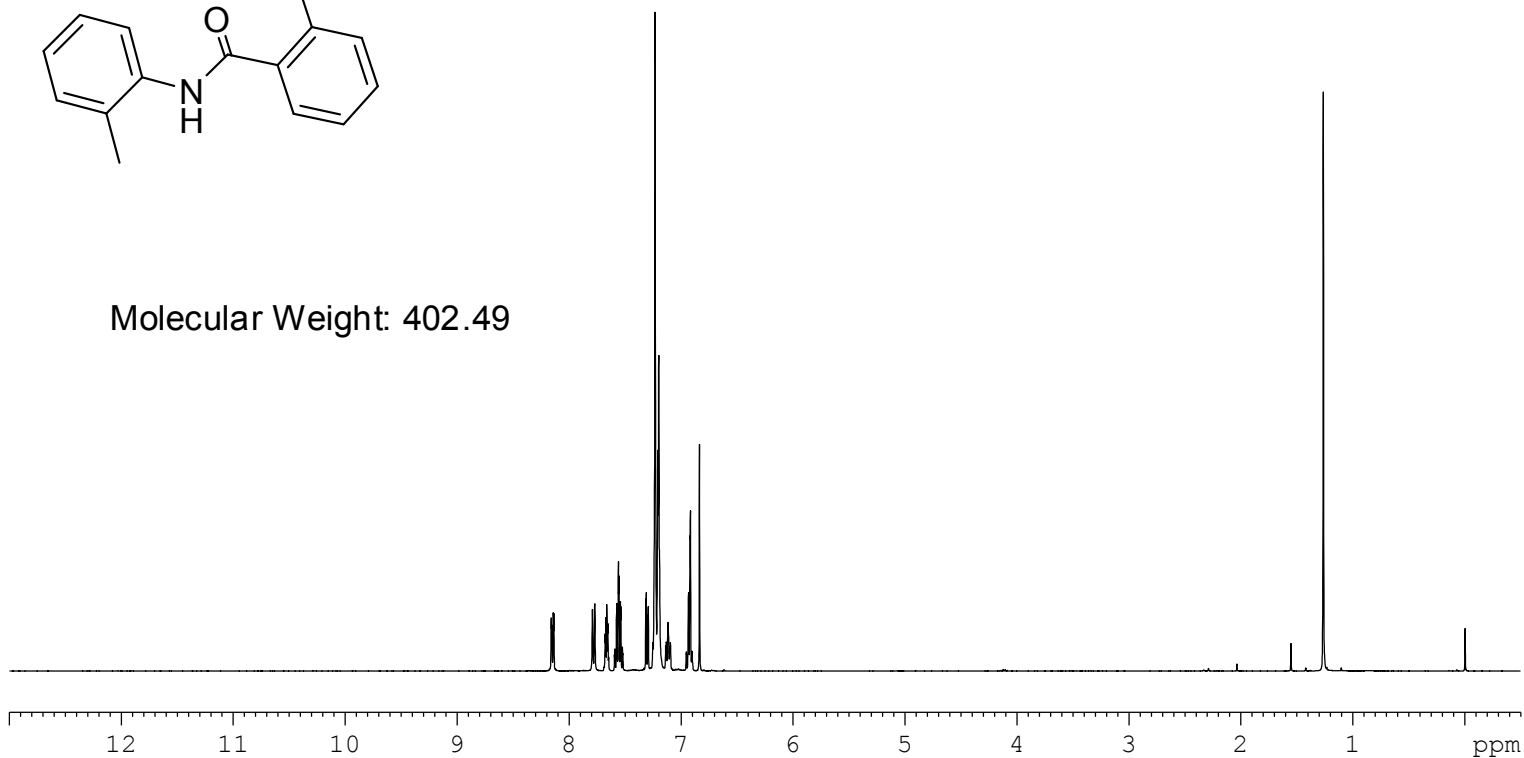

1.000  
1.011  
1.018  
2.111  
1.043  
5.361  
4.044  
1.117  
2.043  
1.005

3.100

Current Data Parameters  
NAME spiro1  
EXPNO 176  
PROCNO 1

F2 - Acquisition Parameters  
Date\_ 20160209  
Time 19.42  
INSTRUM spect  
PROBHD 5 mm PABBO BB/  
PULPROG zg30  
TD 32768  
SOLVENT CDCl3  
NS 32  
DS 0  
SWH 7211.539 Hz  
FIDRES 0.220079 Hz  
AQ 2.2719147 sec  
RG 89.08  
DW 69.333 usec  
DE 10.50 usec  
TE 297.2 K  
D1 2.00000000 sec  
TD0 1

===== CHANNEL f1 =====  
SFO1 400.1324008 MHz  
NUC1 1H  
P1 12.90 usec  
PLW1 15.00000000 W

F2 - Processing parameters  
SI 16384  
SF 400.1300178 MHz  
WDW EM  
SSB 0  
LB 0 Hz  
GB 0  
PC 1.00

2-(2-phenyl-1H-indol-1-yl)-N-o-tolylbenzamide (8c)

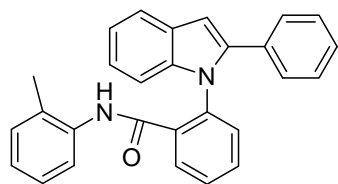

163.33  
141.87  
139.49  
135.98  
135.86  
133.93  
132.44  
131.95  
131.50  
130.35  
130.18  
129.14  
129.02  
128.73  
128.70  
128.19  
126.69  
124.78  
123.63  
122.02  
121.27  
111.00  
105.16  
77.55  
77.23  
76.91

16.38

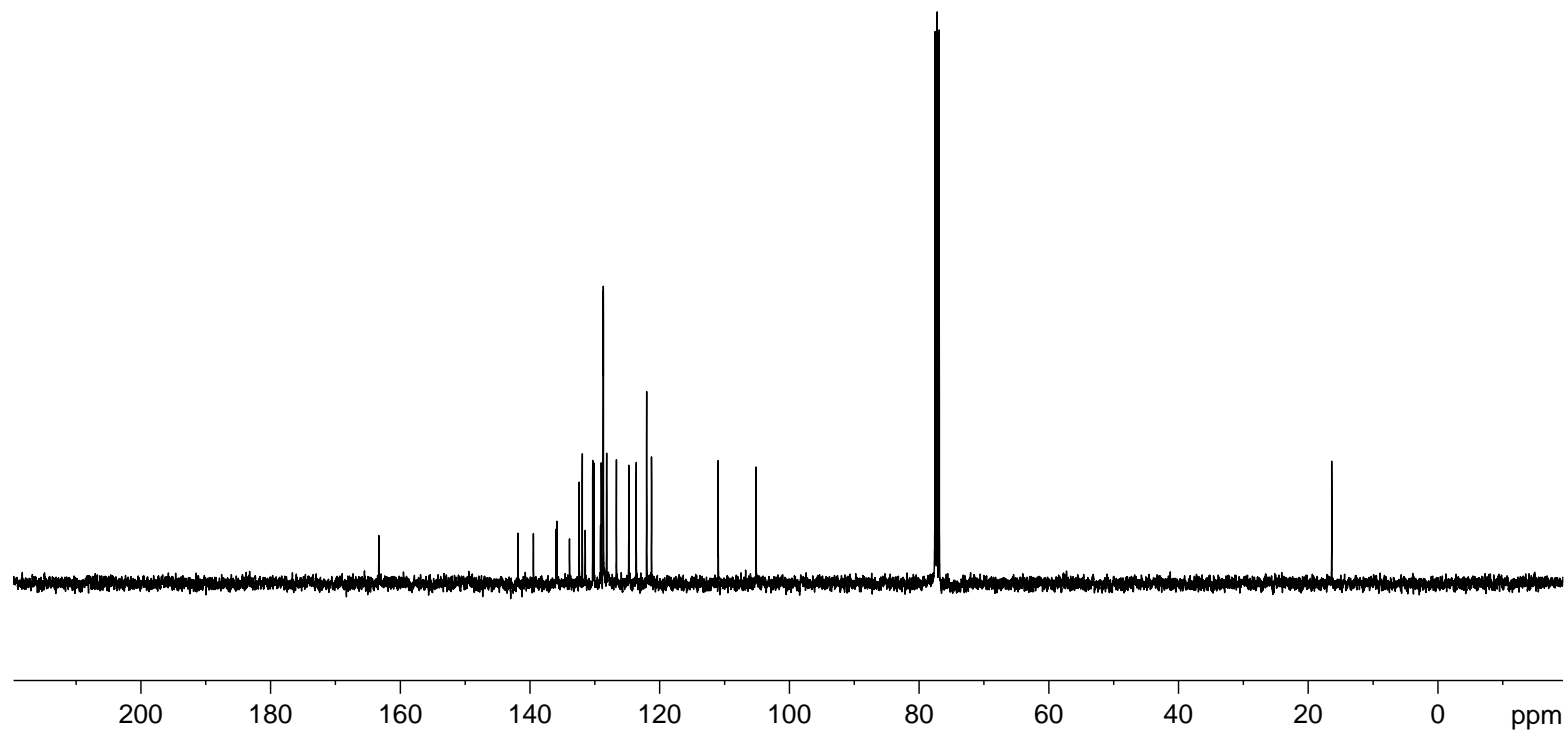

Current Data Parameters  
NAME project 1  
EXPNO 177  
PROCNO 1

F2 - Acquisition Parameters  
Date\_ 20160209  
Time 19.46  
INSTRUM spect  
PROBHD 5 mm PABBO BB/  
PULPROG zgpg30  
TD 32768  
SOLVENT CDCl3  
NS 70  
DS 0  
SWH 24038.461 Hz  
FIDRES 0.733596 Hz  
AQ 0.6815744 sec  
RG 198.09  
DW 20.800 usec  
DE 6.50 usec  
TE 297.2 K  
D1 2.0000000 sec  
D11 0.03000000 sec  
TD0 1

===== CHANNEL f1 =====  
SFO1 100.6228298 MHz  
NUC1 13C  
P1 10.00 usec  
PLW1 47.50000000 W

===== CHANNEL f2 =====  
SFO2 400.1316005 MHz  
NUC2 1H  
CPDPRG[2] waltz16  
PCPD2 90.00 usec  
PLW2 15.00000000 W  
PLW12 0.33750001 W  
PLW13 0.27338001 W

F2 - Processing parameters  
SI 32768  
SF 100.6127502 MHz  
WDW EM  
SSB 0  
LB 2.00 Hz  
GB 0  
PC 1.00

N-(4-methoxyphenyl)-2-(2-phenyl-1H-indol-1-yl)benzamide (8d)

8.0562  
8.0530  
8.0371  
8.0336  
7.7459  
7.7404  
7.7323  
7.7242  
7.6283  
7.6248  
7.6095  
7.6059  
7.5907  
7.5869  
7.5521  
7.5331  
7.5167  
7.5144  
7.4698  
7.4504  
7.2656  
7.2525  
7.2468  
7.2385  
7.2295  
7.2269  
7.2221  
7.2026  
7.1972  
7.1845  
7.1702  
7.1644  
7.1594  
7.1567  
7.1407  
7.1352  
6.8481  
6.8111  
6.7887  
6.7812  
6.7075  
6.6951  
6.6866  
6.6642  
3.7136  
1.5706

Current Data Parameters  
NAME spiro1  
EXPNO 172  
PROCNO 1

F2 - Acquisition Parameters  
Date\_ 20160209  
Time 19.15  
INSTRUM spect  
PROBHD 5 mm PABBO BB/  
PULPROG zg30  
TD 32768  
SOLVENT CDCl3  
NS 32  
DS 0  
SWH 7211.539 Hz  
FIDRES 0.220079 Hz  
AQ 2.2719147 sec  
RG 78.51  
DW 69.333 usec  
DE 10.50 usec  
TE 297.1 K  
D1 2.0000000 sec  
TD0 1

===== CHANNEL f1 =====  
SFO1 400.1324008 MHz  
NUC1 1H  
P1 12.90 usec  
PLW1 15.00000000 W

F2 - Processing parameters  
SI 16384  
SF 400.1300178 MHz  
WDW EM  
SSB 0  
LB 0 Hz  
GB 0  
PC 1.00

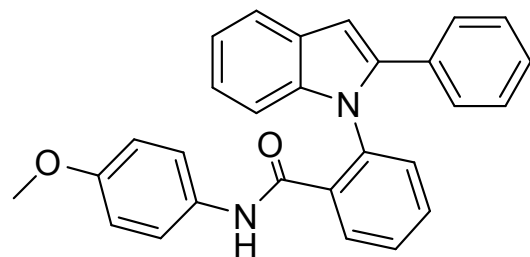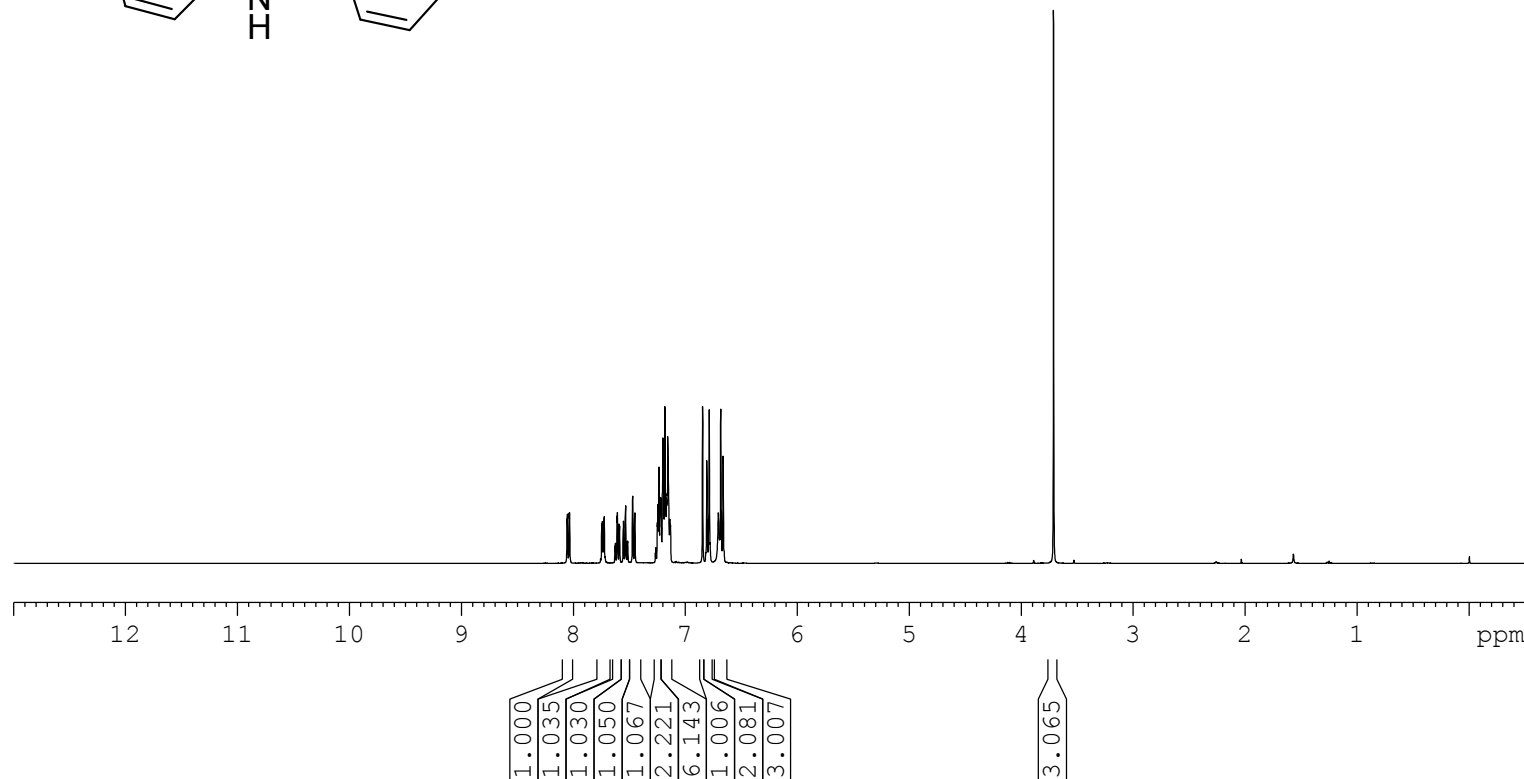

N-(4-methoxyphenyl)-2-(2-phenyl-1H-indol-1-yl)benzamide (8d)

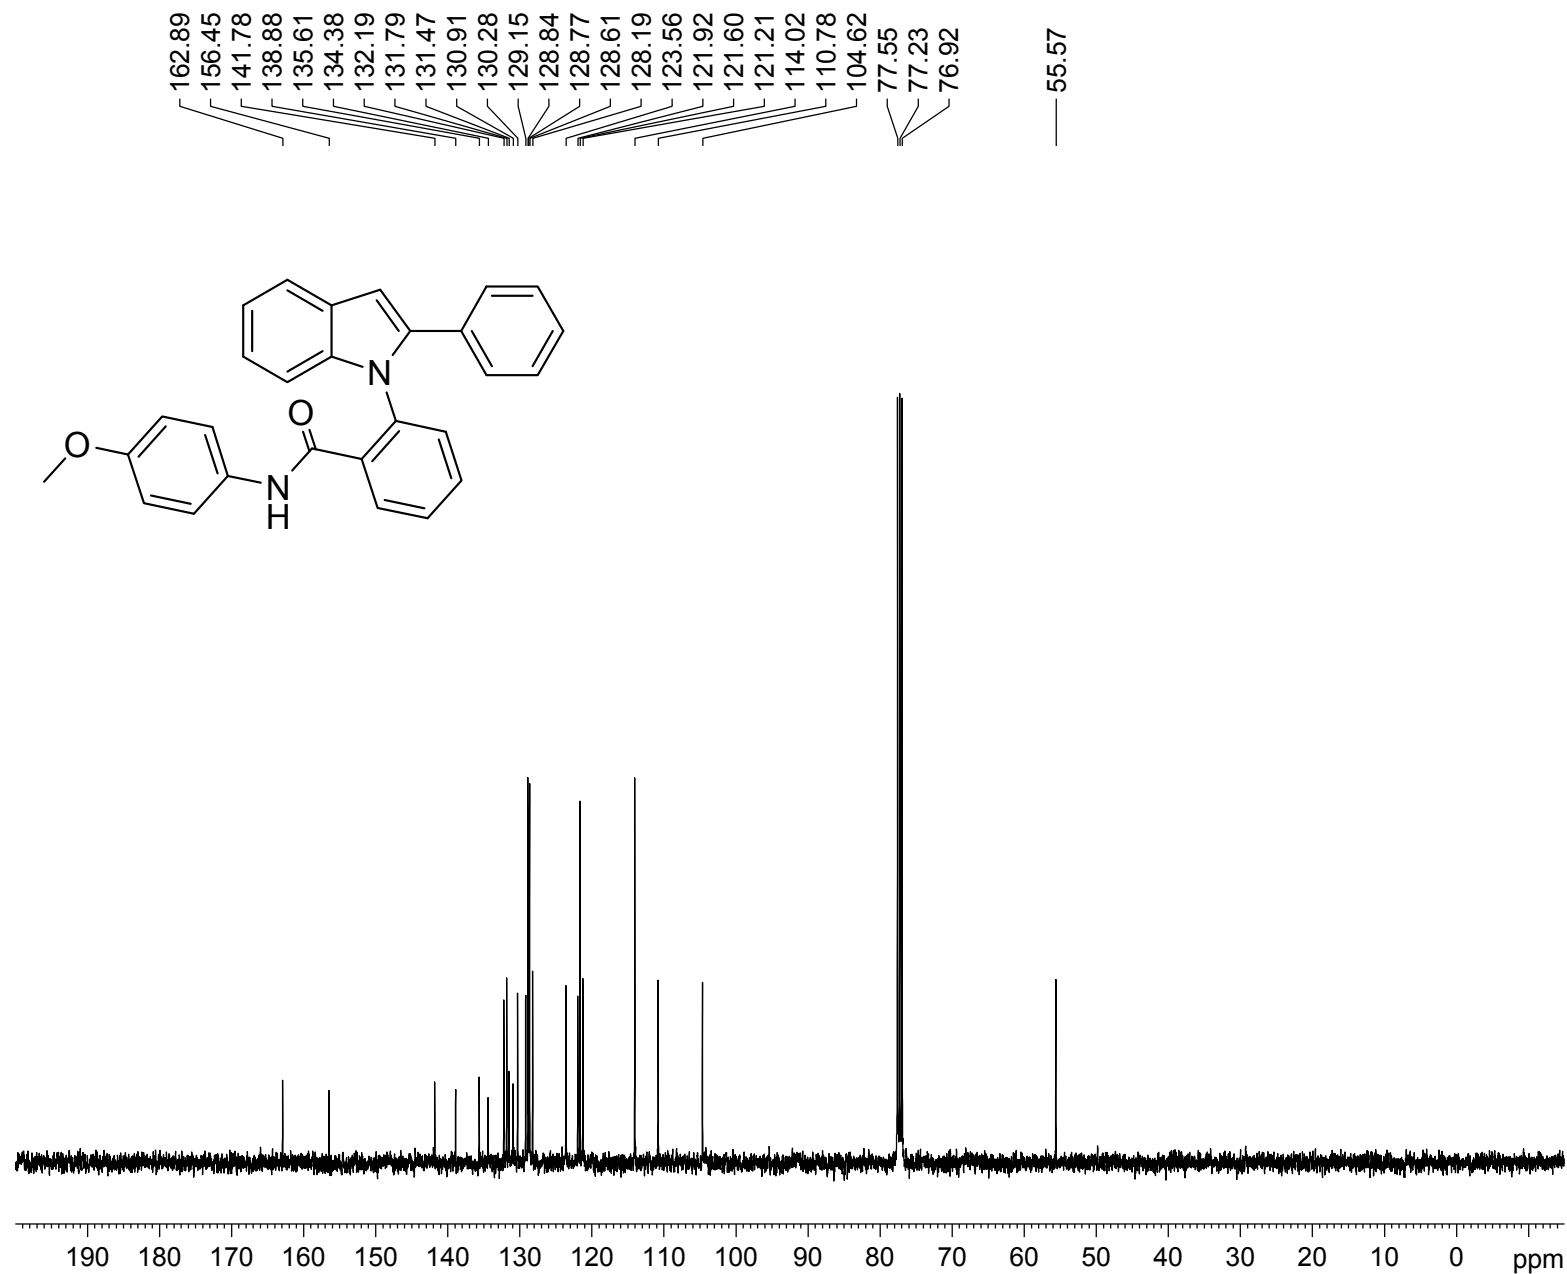

Current Data Parameters

NAME spiro1  
EXPNO 173  
PROCNO 1

F2 - Acquisition Parameters

Date\_ 20160209  
Time 19.18  
INSTRUM spect  
PROBHD 5 mm PABBO BB/  
PULPROG zgpg30  
TD 32768  
SOLVENT CDCl3  
NS 82  
DS 0  
SWH 24038.461 Hz  
FIDRES 0.733596 Hz  
AQ 0.6815744 sec  
RG 198.09  
DW 20.800 usec  
DE 6.50 usec  
TE 297.2 K  
D1 2.00000000 sec  
D11 0.03000000 sec  
TD0 1

==== CHANNEL f1 =====

SFO1 100.6228298 MHz  
NUC1 13C  
P1 10.00 usec  
PLW1 47.50000000 W

==== CHANNEL f2 =====

SFO2 400.1316005 MHz  
NUC2 1H  
CPDPRG[2] waltz16  
PCPD2 90.00 usec  
PLW2 15.00000000 W  
PLW12 0.33750001 W  
PLW13 0.27338001 W

F2 - Processing parameters

SI 32768  
SF 100.6127512 MHz  
WDW EM  
SSB 0  
LB 2.00 Hz  
GB 0  
PC 1.00

N-benzyl-2-(2-phenyl-1H-indol-1-yl)benzamide (8e)

Current Data Parameters  
 NAME spiro1  
 EXPNO 166  
 PROCNO 1

F2 - Acquisition Parameters  
 Date\_ 20160209  
 Time 18.13  
 INSTRUM spect  
 PROBHD 5 mm PABBO BB/  
 PULPROG zg30  
 TD 32768  
 SOLVENT CDCl3  
 NS 32  
 DS 0  
 SWH 7211.539 Hz  
 FIDRES 0.220079 Hz  
 AQ 2.2719147 sec  
 RG 4.01  
 DW 69.333 usec  
 DE 10.50 usec  
 TE 297.0 K  
 D1 2.0000000 sec  
 TD0 1

===== CHANNEL f1 =====  
 SFO1 400.1324008 MHz  
 NUC1 1H  
 P1 12.90 usec  
 PLW1 15.0000000 W

F2 - Processing parameters  
 SI 16384  
 SF 400.1300122 MHz  
 WDW EM  
 SSB 0  
 LB 0 Hz  
 GB 0  
 PC 1.00

8.0309  
 8.0264  
 8.0133  
 8.0076  
 7.6594  
 7.6411  
 7.5548  
 7.5501  
 7.5363  
 7.5317  
 7.5188  
 7.5137  
 7.5046  
 7.5013  
 7.4863  
 7.2998  
 7.2954  
 7.2809  
 7.2779  
 7.2540  
 7.2118  
 7.2049  
 7.1953  
 7.1746  
 7.1654  
 7.1590  
 7.1514  
 7.1391  
 7.1206  
 7.1040  
 7.0468  
 7.0271  
 6.7528  
 6.7130  
 6.6956  
 5.5499  
 4.2053  
 4.1916  
 4.1684  
 4.1623  
 4.1551  
 4.1494  
 4.1261  
 4.1123  
 1.5801

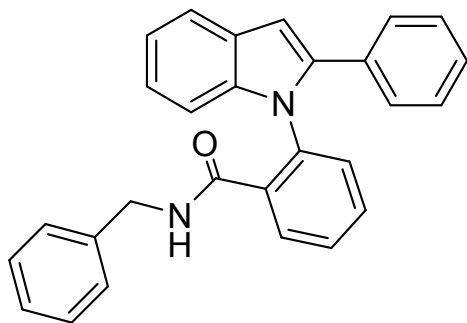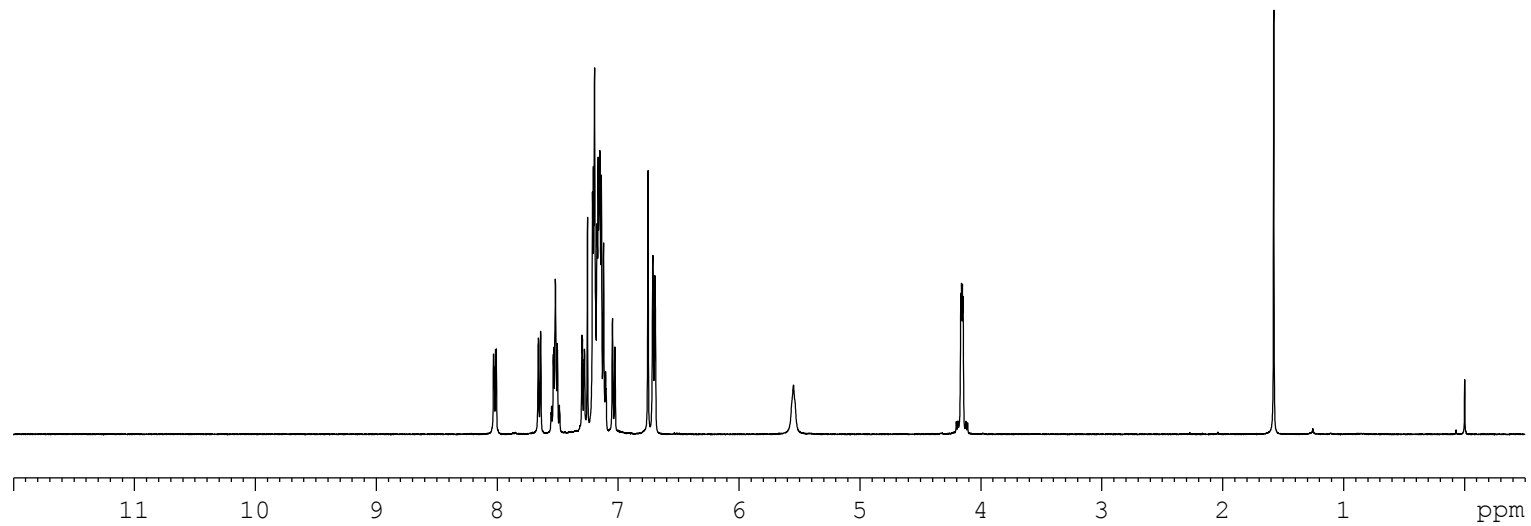

0.948  
 0.981  
 2.008  
 1.070  
 3.051  
 6.030  
 1.009  
 0.955  
 1.852  
 0.973  
 1.998

N-benzyl-2-(2-phenyl-1H-indol-1-yl)benzamide (8e)

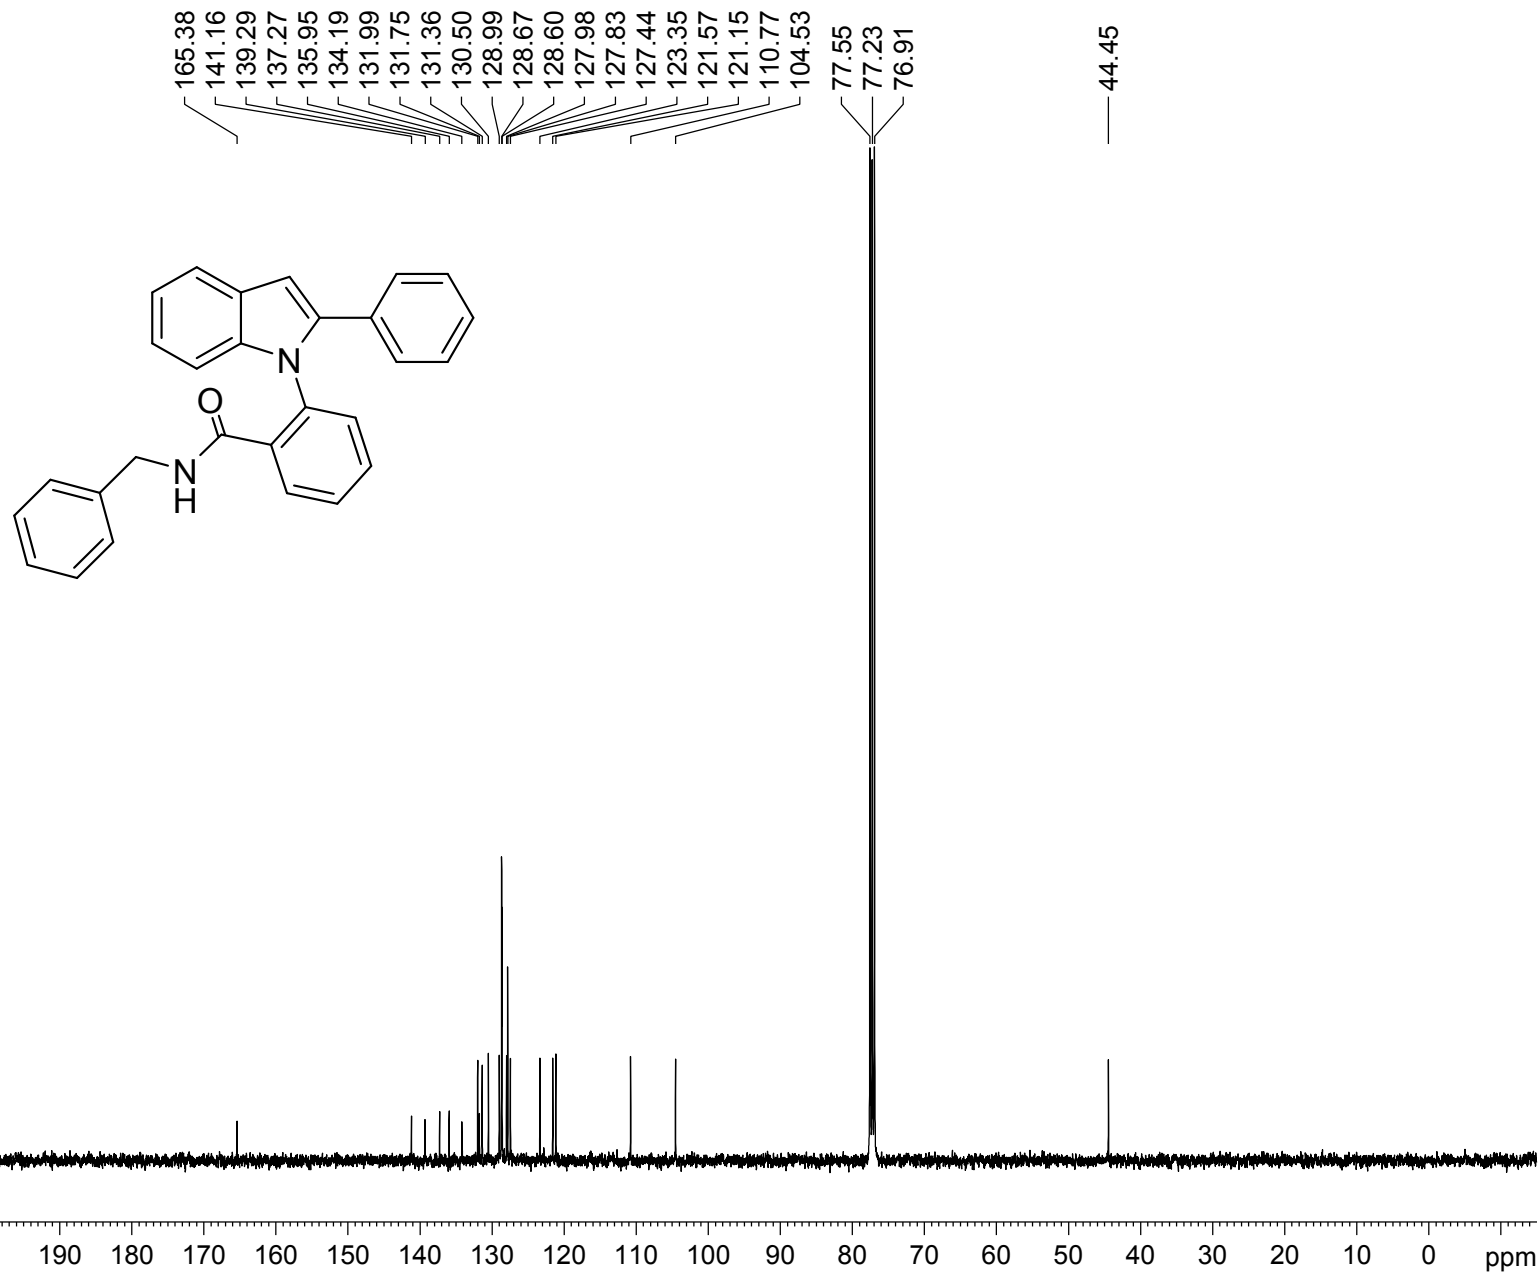

Current Data Parameters

NAME spiro1  
EXPNO 167  
PROCNO 1

F2 - Acquisition Parameters

Date\_ 20160209  
Time 18.17  
INSTRUM spect  
PROBHD 5 mm PABBO BB/  
PULPROG zgpg30  
TD 32768  
SOLVENT CDCl3  
NS 413  
DS 0  
SWH 24038.461 Hz  
FIDRES 0.733596 Hz  
AQ 0.6815744 sec  
RG 198.09  
DW 20.800 usec  
DE 6.50 usec  
TE 297.0 K  
D1 2.00000000 sec  
D11 0.03000000 sec  
TD0 1

===== CHANNEL f1 =====

SFO1 100.6228298 MHz  
NUC1 13C  
P1 10.00 usec  
PLW1 47.50000000 W

===== CHANNEL f2 =====

SFO2 400.1316005 MHz  
NUC2 1H  
CPDPRG[2] waltz16  
PCPD2 90.00 usec  
PLW2 15.00000000 W  
PLW12 0.33750001 W  
PLW13 0.27338001 W

F2 - Processing parameters

SI 32768  
SF 100.6127485 MHz  
WDW EM  
SSB 0  
LB 2.00 Hz  
GB 0  
PC 1.00

N-(2,2-diphenylethyl)-2-(2-phenyl-1H-indol-1-yl)benzamide (8f)

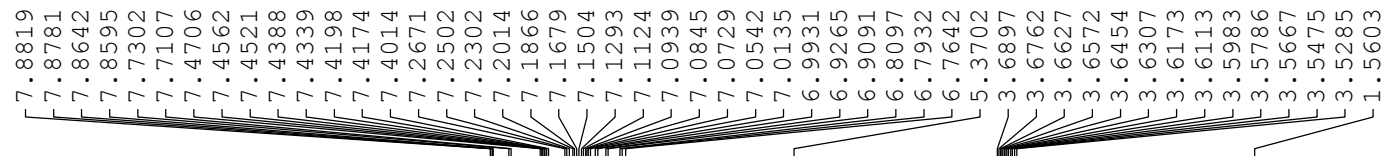

Current Data Parameters  
NAME spiro1  
EXPNO 168  
PROCNO 1

F2 - Acquisition Parameters  
Date\_ 20160209  
Time 18.42  
INSTRUM spect  
PROBHD 5 mm PABBO BB/  
PULPROG zg30  
TD 32768  
SOLVENT CDCl3  
NS 32  
DS 0  
SWH 7211.539 Hz  
FIDRES 0.220079 Hz  
AQ 2.2719147 sec  
RG 113.31  
DW 69.333 usec  
DE 10.50 usec  
TE 297.1 K  
D1 2.00000000 sec  
TD0 1

==== CHANNEL f1 =====  
SFO1 400.1324008 MHz  
NUC1 1H  
P1 12.90 usec  
PLW1 15.00000000 W

F2 - Processing parameters  
SI 16384  
SF 400.1300138 MHz  
WDW EM  
SSB 0  
LB 0 Hz  
GB 0  
PC 1.00

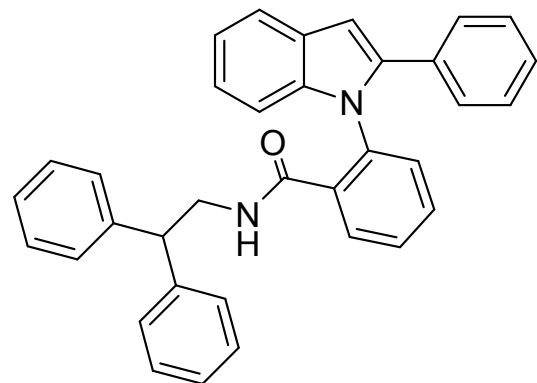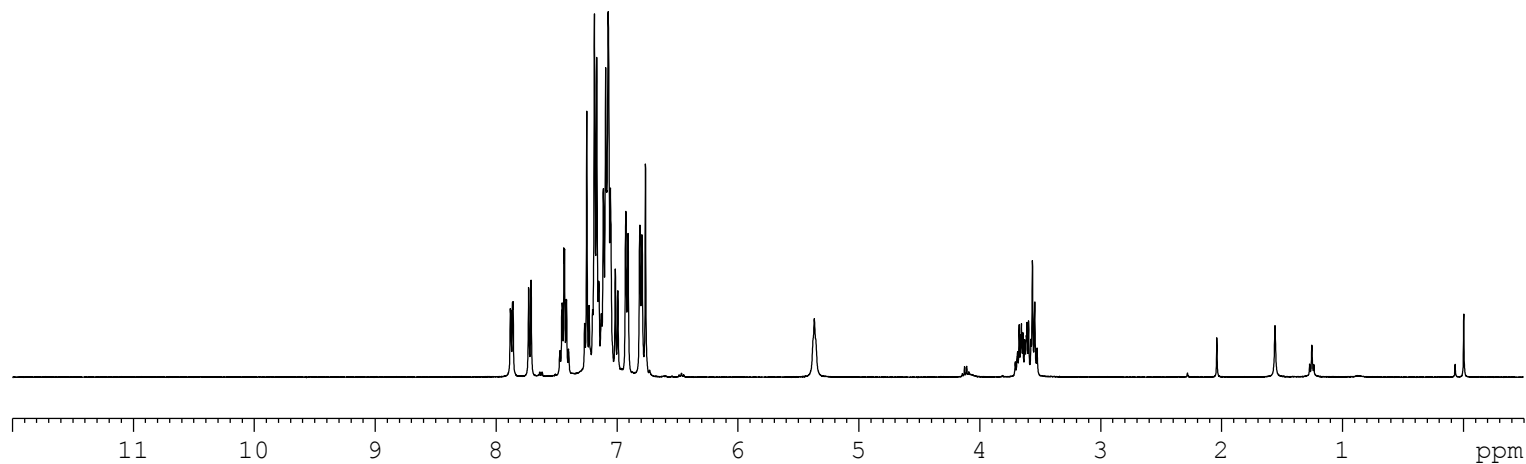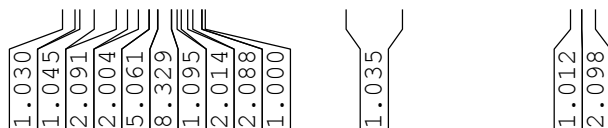

N-(2,2-diphenylethyl)-2-(2-phenyl-1H-indol-1-yl)benzamide (8f)

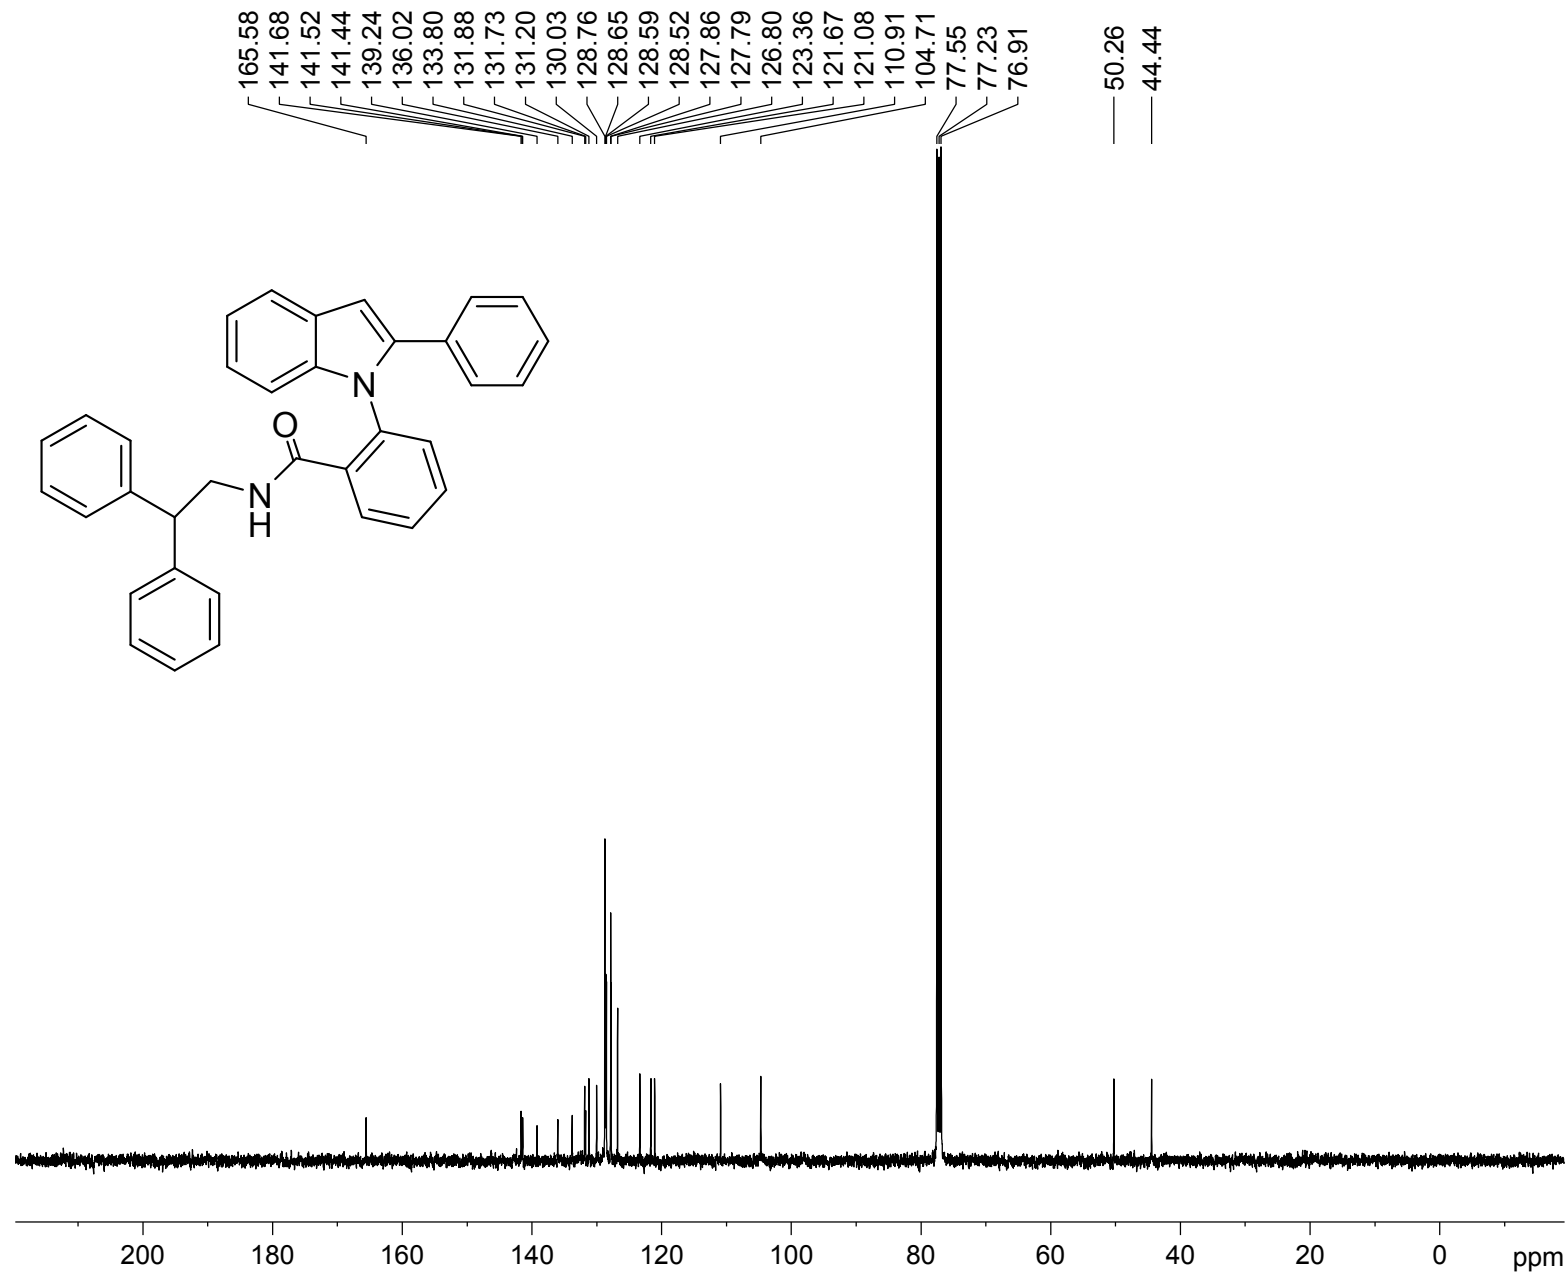

Current Data Parameters

NAME spiro1  
EXPNO 169  
PROCNO 1

F2 - Acquisition Parameters

Date\_ 20160209  
Time 18.46  
INSTRUM spect  
PROBHD 5 mm PABBO BB/  
PULPROG zgpg30  
TD 32768  
SOLVENT CDCl3  
NS 340  
DS 0  
SWH 24038.461 Hz  
FIDRES 0.733596 Hz  
AQ 0.6815744 sec  
RG 198.09  
DW 20.800 usec  
DE 6.50 usec  
TE 297.5 K  
D1 2.00000000 sec  
D11 0.03000000 sec  
TD0 1

==== CHANNEL f1 =====

SFO1 100.6228298 MHz  
NUC1 13C  
P1 10.00 usec  
PLW1 47.50000000 W

==== CHANNEL f2 =====

SFO2 400.1316005 MHz  
NUC2 1H  
CPDPRG[2] waltz16  
PCPD2 90.00 usec  
PLW2 15.00000000 W  
PLW12 0.33750001 W  
PLW13 0.27338001 W

F2 - Processing parameters

SI 32768  
SF 100.6127487 MHz  
WDW EM  
SSB 0  
LB 2.00 Hz  
GB 0  
PC 1.00



N-ethyl-2-(2-phenyl-1H-indol-1-yl)benzamide (8g)

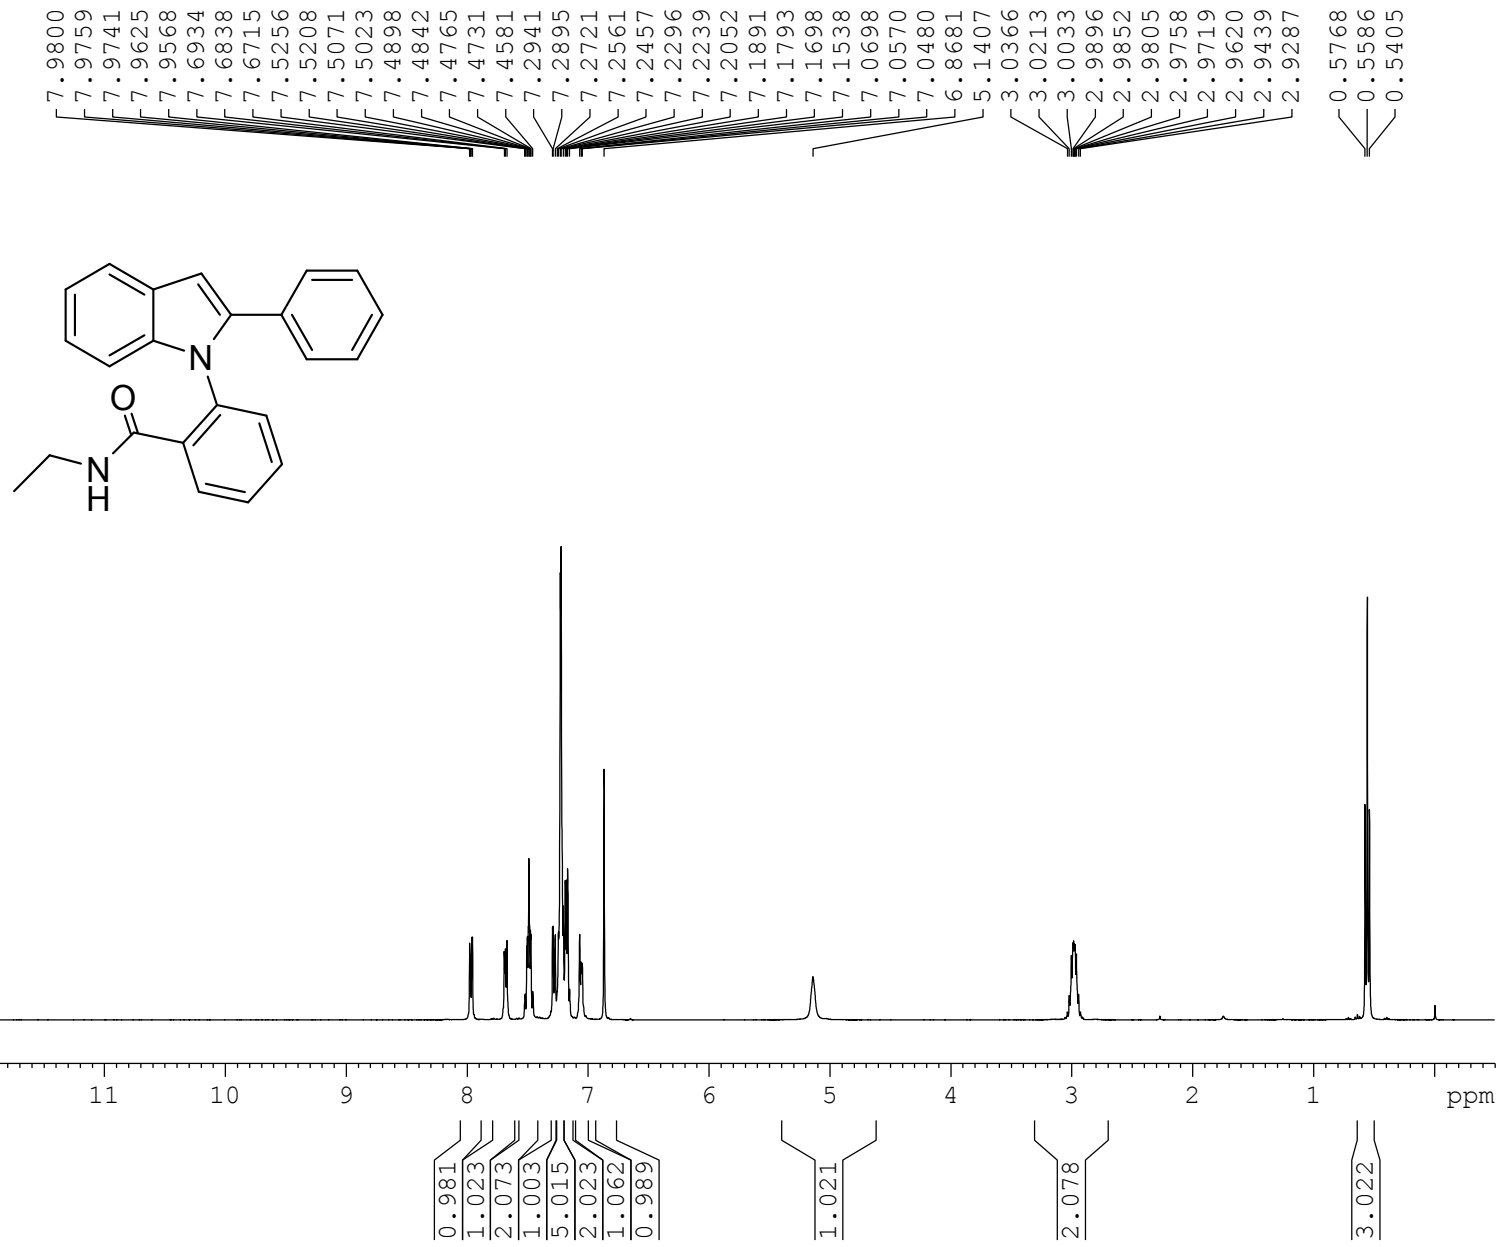

Current Data Parameters  
 NAME spiro1  
 EXPNO 170  
 PROCNO 1

F2 - Acquisition Parameters  
 Date\_ 20160209  
 Time 19.05  
 INSTRUM spect  
 PROBHD 5 mm PABBO BB/  
 PULPROG zg30  
 TD 32768  
 SOLVENT CDCl3  
 NS 32  
 DS 0  
 SWH 7211.539 Hz  
 FIDRES 0.220079 Hz  
 AQ 2.2719147 sec  
 RG 45.15  
 DW 69.333 usec  
 DE 10.50 usec  
 TE 297.2 K  
 D1 2.00000000 sec  
 TD0 1

==== CHANNEL f1 =====  
 SFO1 400.1324008 MHz  
 NUC1 1H  
 P1 12.90 usec  
 PLW1 15.00000000 W

F2 - Processing parameters  
 SI 16384  
 SF 400.1300212 MHz  
 WDW EM  
 SSB 0  
 LB 0 Hz  
 GB 0  
 PC 1.00

N-ethyl-2-(2-phenyl-1H-indol-1-yl)benzamide (8g)

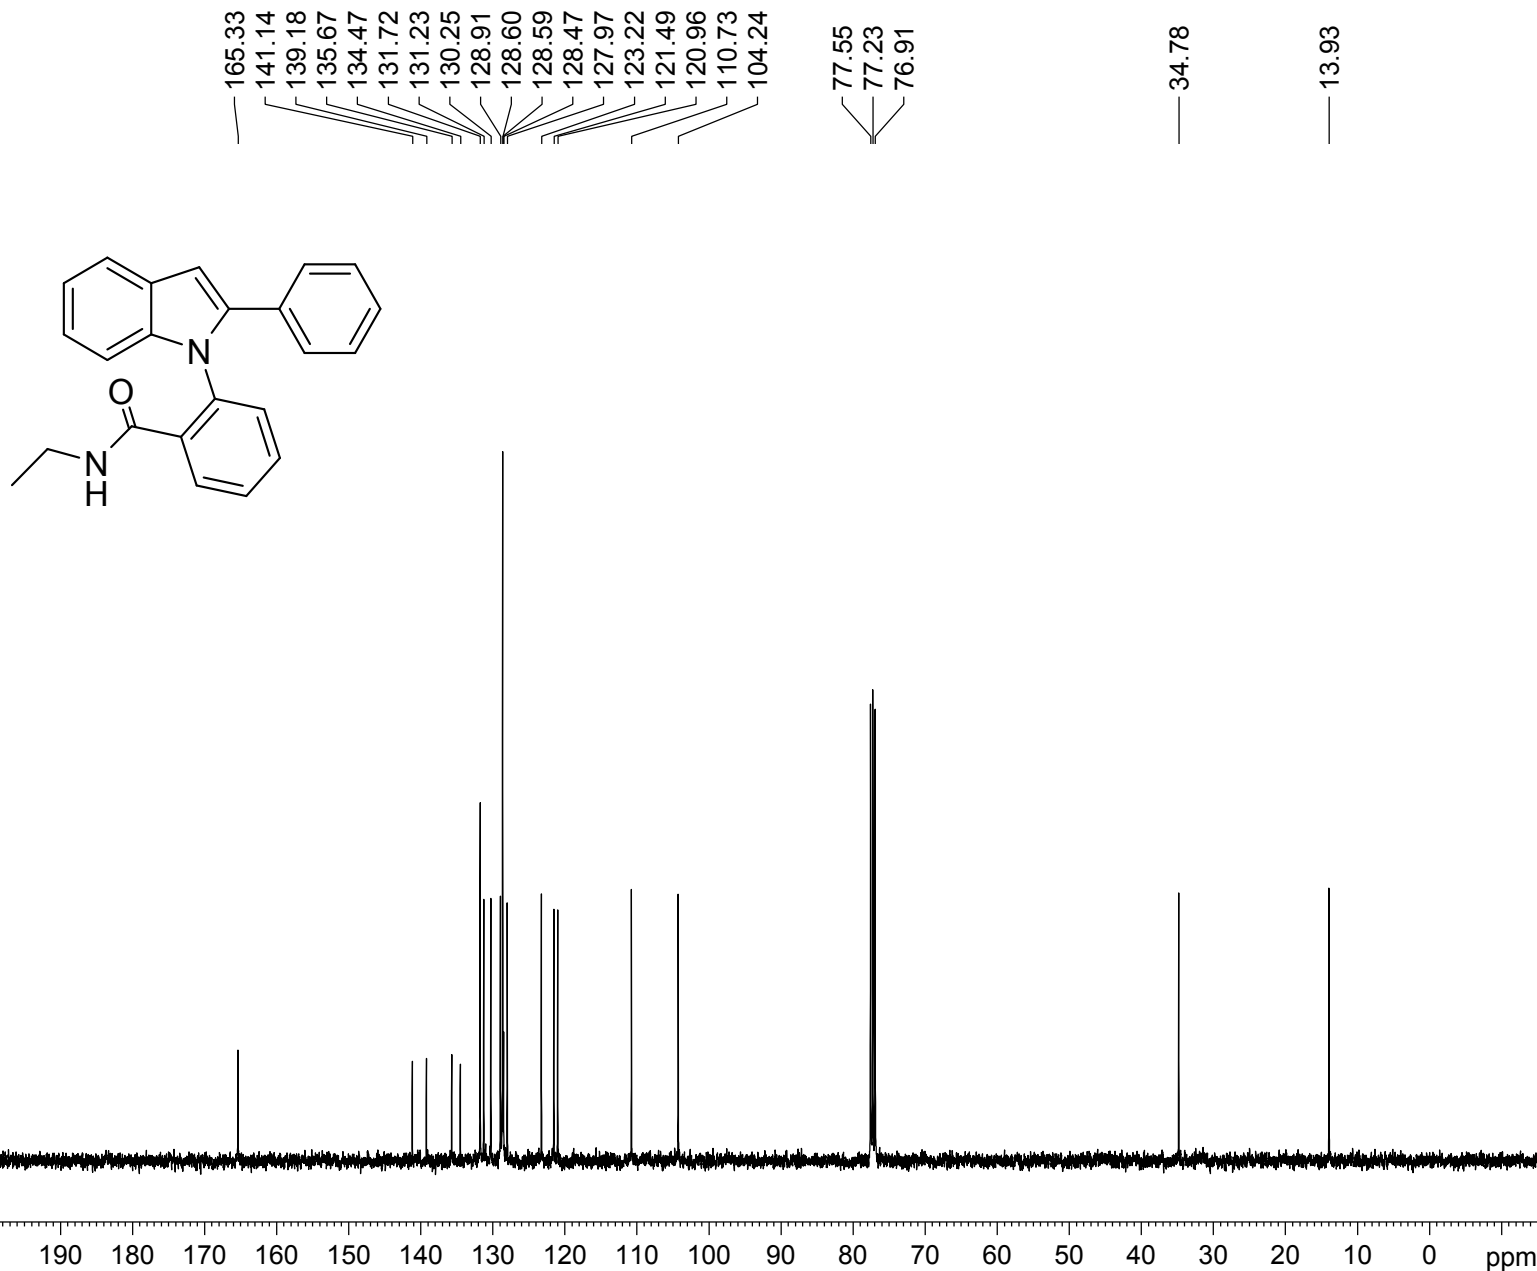

Current Data Parameters

NAME spiro1  
 EXPNO 171  
 PROCNO 1

F2 - Acquisition Parameters

Date\_ 20160209  
 Time 19.09  
 INSTRUM spect  
 PROBHD 5 mm PABBO BB/  
 PULPROG zgpg30  
 TD 32768  
 SOLVENT CDCl3  
 NS 44  
 DS 0  
 SWH 24038.461 Hz  
 FIDRES 0.733596 Hz  
 AQ 0.6815744 sec  
 RG 198.09  
 DW 20.800 usec  
 DE 6.50 usec  
 TE 297.4 K  
 D1 2.00000000 sec  
 D11 0.03000000 sec  
 TD0 1

==== CHANNEL f1 =====

SFO1 100.6228298 MHz  
 NUC1 13C  
 P1 10.00 usec  
 PLW1 47.50000000 W

==== CHANNEL f2 =====

SFO2 400.1316005 MHz  
 NUC2 1H  
 CPDPRG[2] waltz16  
 PCPD2 90.00 usec  
 PLW2 15.00000000 W  
 PLW12 0.33750001 W  
 PLW13 0.27338001 W

F2 - Processing parameters

SI 32768  
 SF 100.6127571 MHz  
 WDW EM  
 SSB 0  
 LB 2.00 Hz  
 GB 0  
 PC 1.00

N-allyl-2-(2-phenyl-1H-indol-1-yl)benzamide (8h)

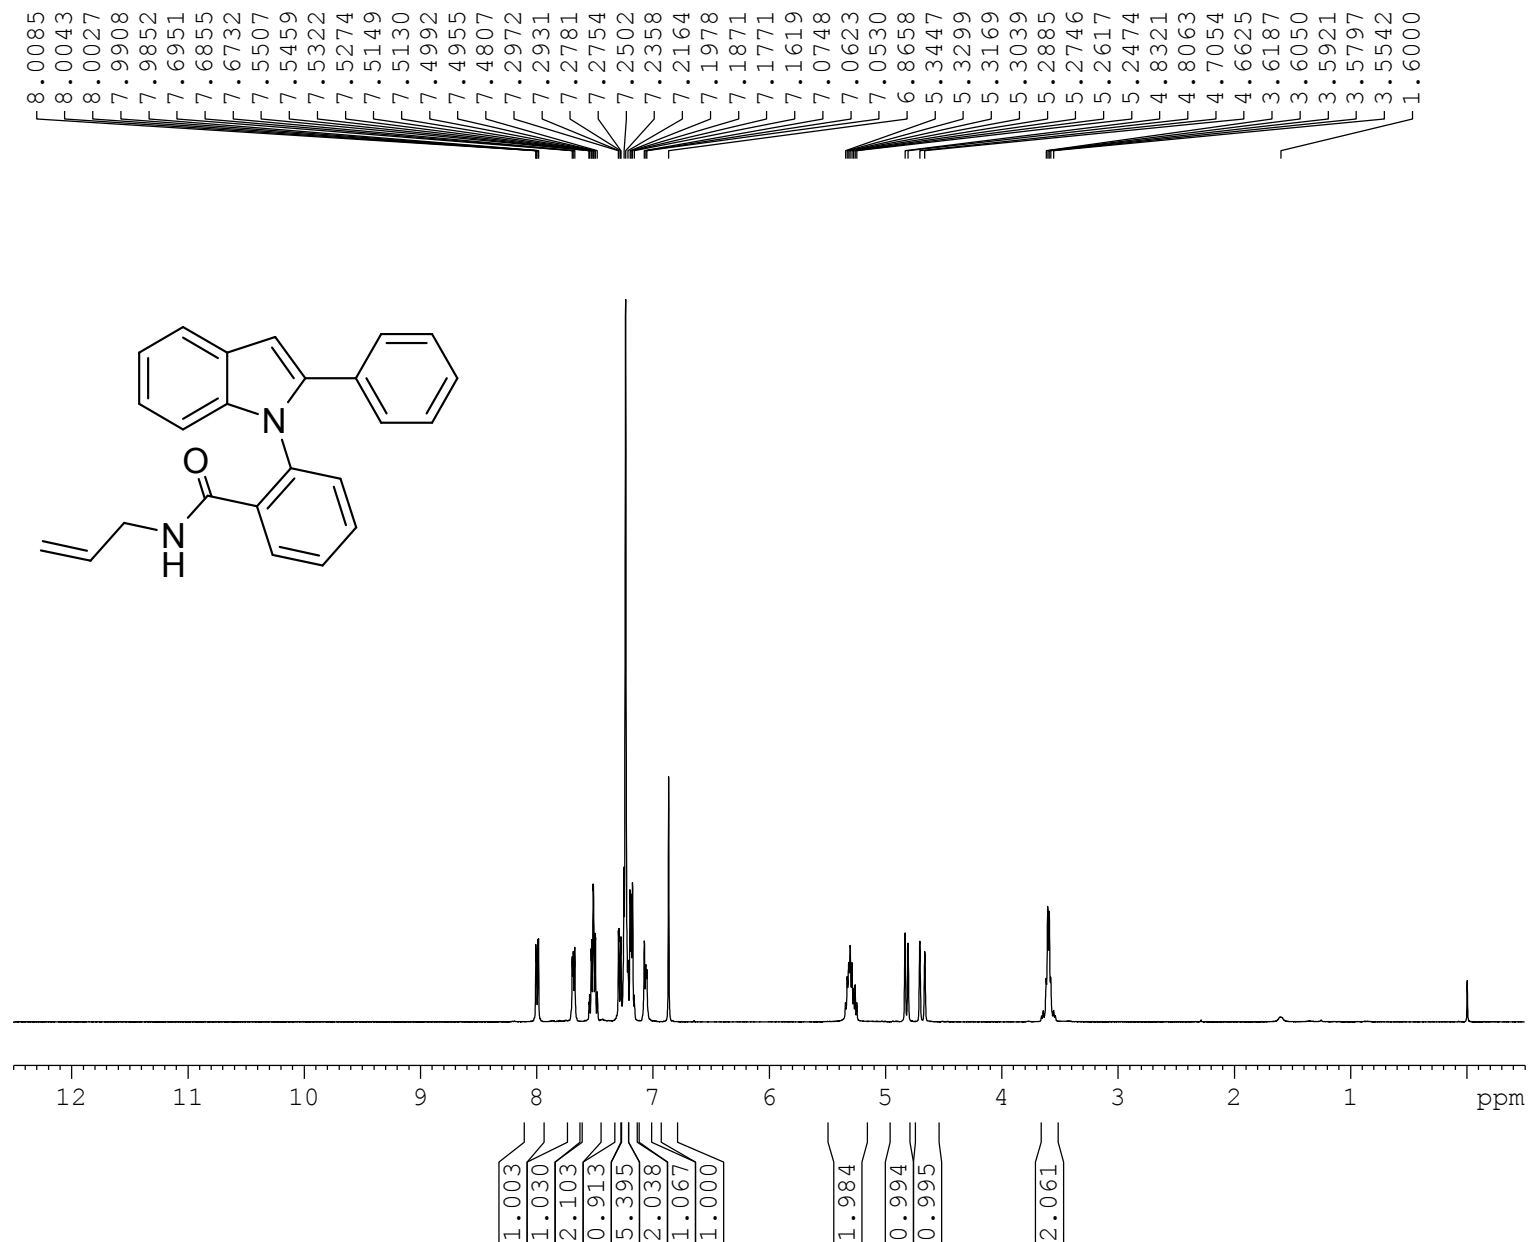

Current Data Parameters  
 NAME spiro1  
 EXPNO 178  
 PROCNO 1

F2 - Acquisition Parameters  
 Date\_ 20160209  
 Time 19.53  
 INSTRUM spect  
 PROBHD 5 mm PABBO BB/  
 PULPROG zg30  
 TD 32768  
 SOLVENT CDCl3  
 NS 32  
 DS 0  
 SWH 7211.539 Hz  
 FIDRES 0.220079 Hz  
 AQ 2.2719147 sec  
 RG 89.08  
 DW 69.333 usec  
 DE 10.50 usec  
 TE 297.0 K  
 D1 2.00000000 sec  
 TD0 1

===== CHANNEL f1 =====  
 SFO1 400.1324008 MHz  
 NUC1 1H  
 P1 12.90 usec  
 PLW1 15.00000000 W

F2 - Processing parameters  
 SI 16384  
 SF 400.1300138 MHz  
 WDW EM  
 SSB 0  
 LB 0 Hz  
 GB 0  
 PC 1.00

N-allyl-2-(2-phenyl-1H-indol-1-yl)benzamide (8h)

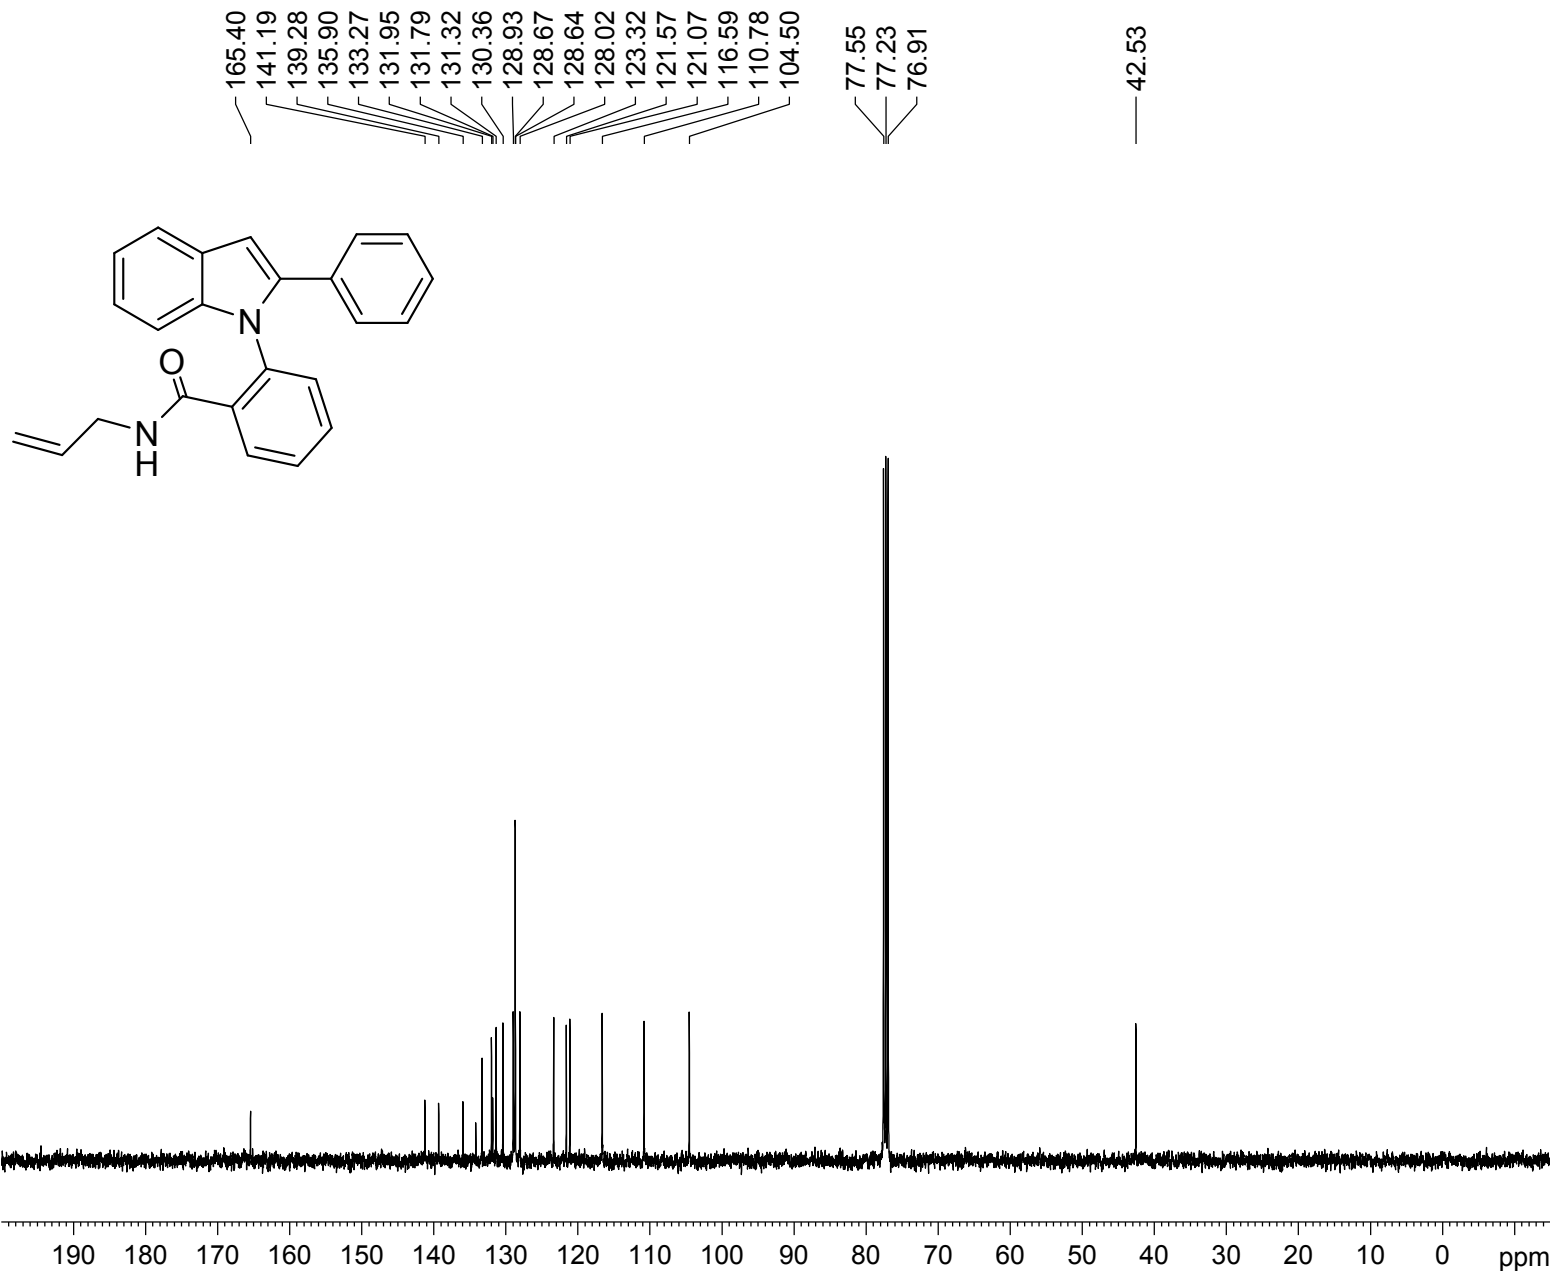

Current Data Parameters

NAME spiro1  
 EXPNO 179  
 PROCNO 1

F2 - Acquisition Parameters

Date\_ 20160209  
 Time 19.55  
 INSTRUM spect  
 PROBHD 5 mm PABBO BB/  
 PULPROG zgpg30  
 TD 32768  
 SOLVENT CDCl3  
 NS 100  
 DS 0  
 SWH 24038.461 Hz  
 FIDRES 0.733596 Hz  
 AQ 0.6815744 sec  
 RG 198.09  
 DW 20.800 usec  
 DE 6.50 usec  
 TE 297.2 K  
 D1 2.0000000 sec  
 D11 0.0300000 sec  
 TD0 1

==== CHANNEL f1 =====

SFO1 100.6228298 MHz  
 NUC1 13C  
 P1 10.00 usec  
 PLW1 47.5000000 W

==== CHANNEL f2 =====

SFO2 400.1316005 MHz  
 NUC2 1H  
 CPDPRG[2] waltz16  
 PCPD2 90.00 usec  
 PLW2 15.0000000 W  
 PLW12 0.33750001 W  
 PLW13 0.27338001 W

F2 - Processing parameters

SI 32768  
 SF 100.6127504 MHz  
 WDW EM  
 SSB 0  
 LB 2.00 Hz  
 GB 0  
 PC 1.00

N-(3-methoxypropyl)-2-(2-phenyl-1H-indol-1-yl)benzamide (8i)

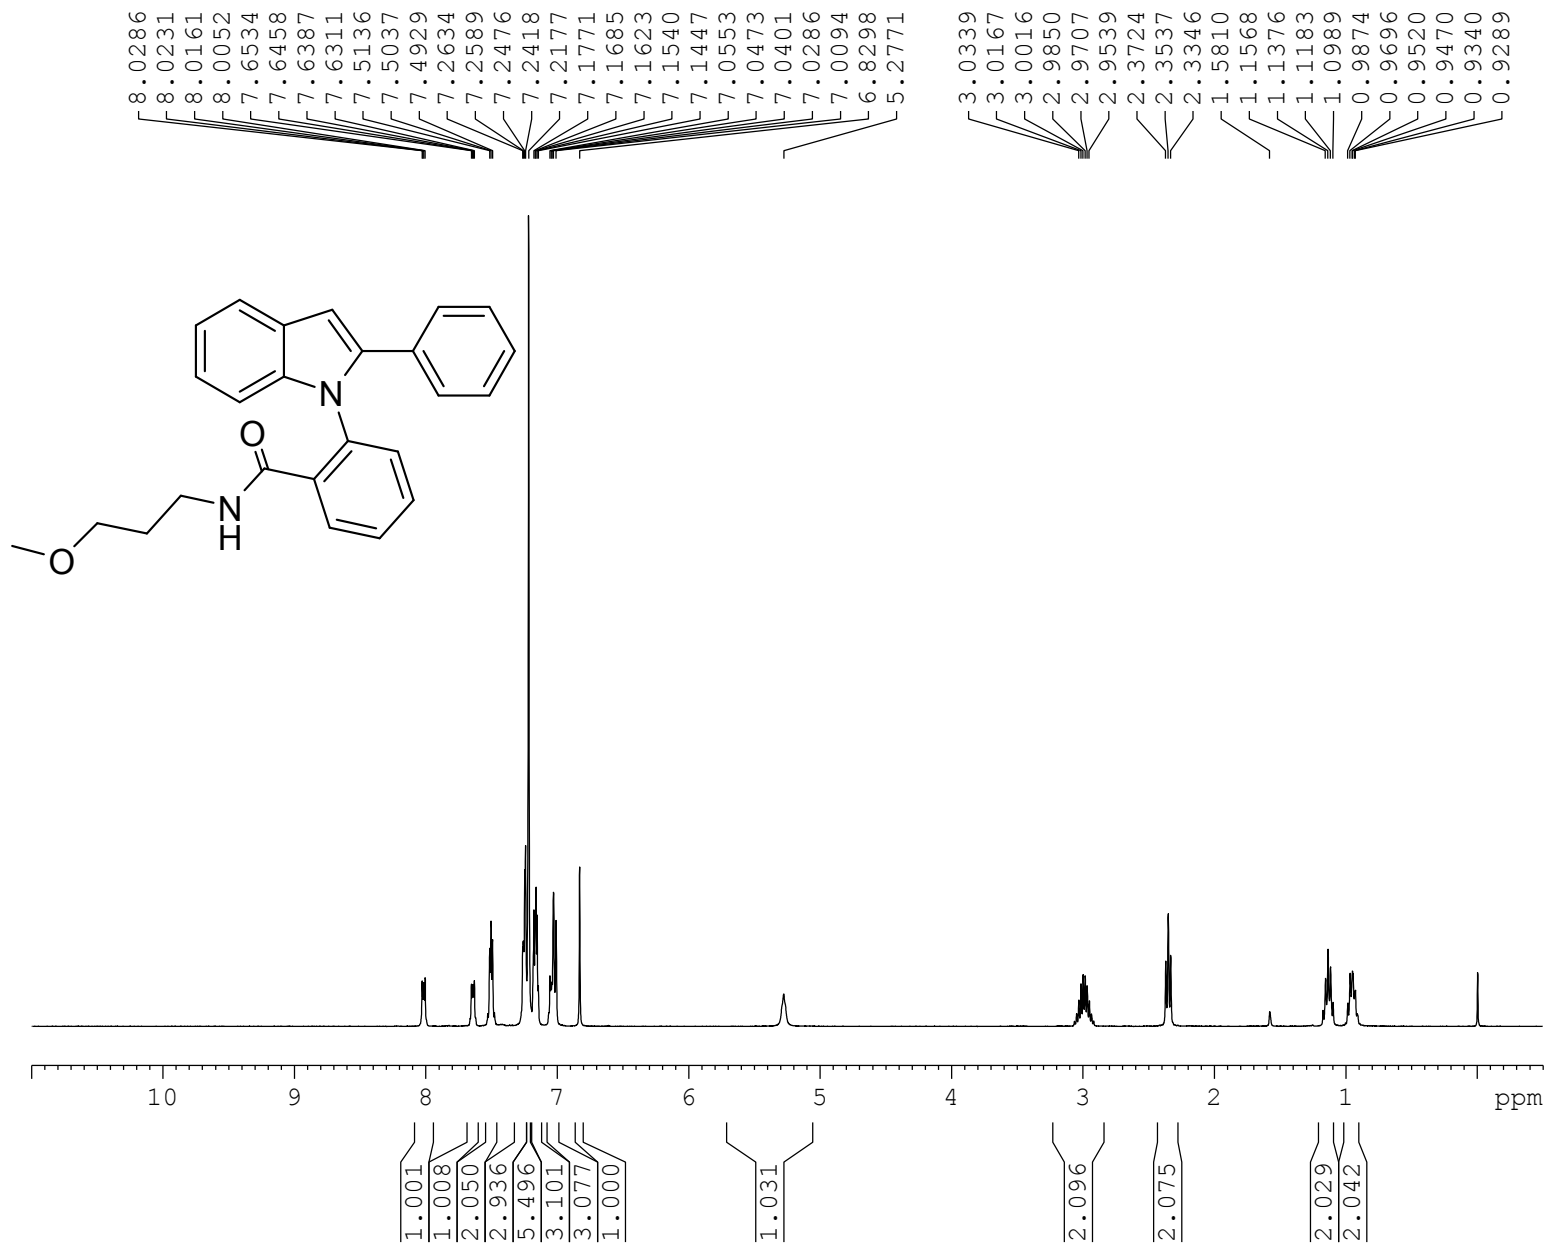

Current Data Parameters  
 NAME spiro1  
 EXPNO 184  
 PROCNO 1

F2 - Acquisition Parameters  
 Date\_ 20160209  
 Time 20.28  
 INSTRUM spect  
 PROBHD 5 mm PABBO BB/  
 PULPROG zg30  
 TD 32768  
 SOLVENT CDCl3  
 NS 32  
 DS 0  
 SWH 7211.539 Hz  
 FIDRES 0.220079 Hz  
 AQ 2.2719147 sec  
 RG 89.08  
 DW 69.333 usec  
 DE 10.50 usec  
 TE 297.1 K  
 D1 2.00000000 sec  
 TD0 1

===== CHANNEL f1 =====  
 SFO1 400.1324008 MHz  
 NUC1 1H  
 P1 12.90 usec  
 PLW1 15.00000000 W

F2 - Processing parameters  
 SI 16384  
 SF 400.1300147 MHz  
 WDW EM  
 SSB 0  
 LB 0 Hz  
 GB 0  
 PC 1.00

N-(3-methoxypropyl)-2-(2-phenyl-1H-indol-1-yl)benzamide (8i)

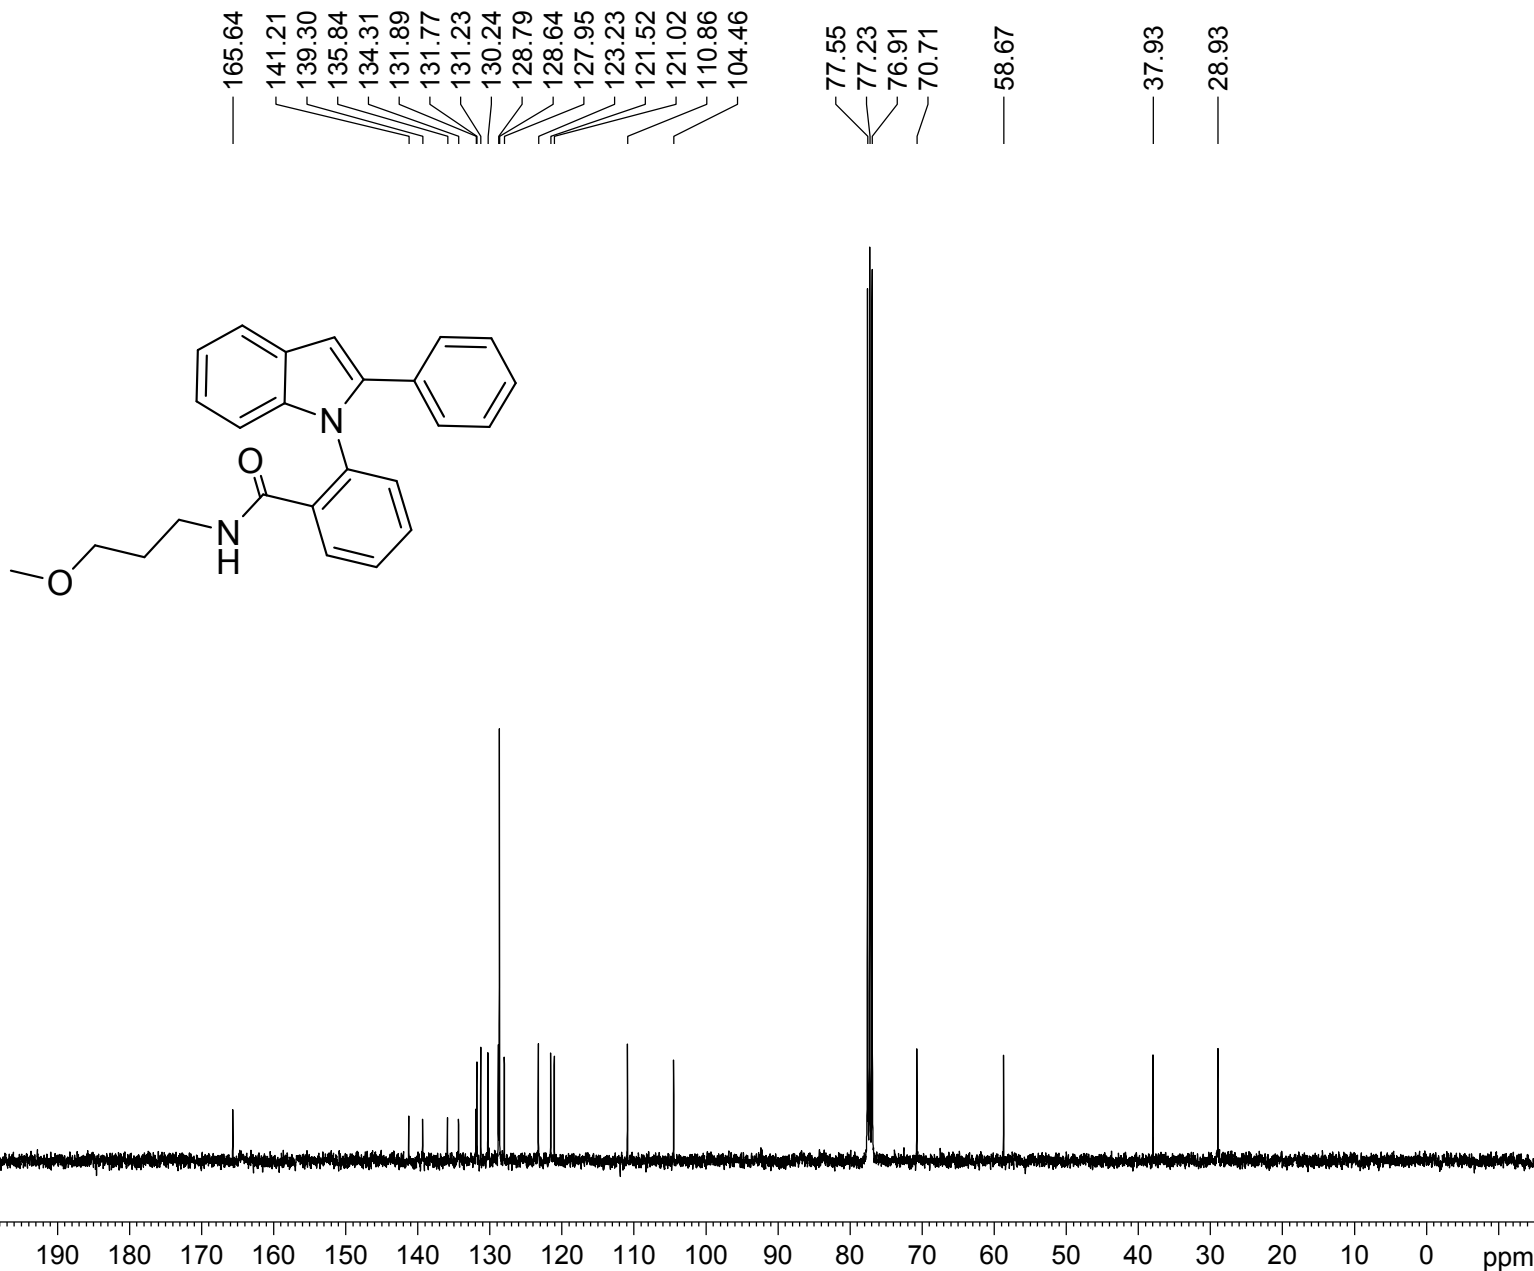

Current Data Parameters

NAME spiro1  
 EXPNO 186  
 PROCNO 1

F2 - Acquisition Parameters

Date\_ 20160209  
 Time 20.43  
 INSTRUM spect  
 PROBHD 5 mm PABBO BB/  
 PULPROG zgpg30  
 TD 32768  
 SOLVENT CDCl3  
 NS 173  
 DS 0  
 SWH 24038.461 Hz  
 FIDRES 0.733596 Hz  
 AQ 0.6815744 sec  
 RG 198.09  
 DW 20.800 usec  
 DE 6.50 usec  
 TE 298.1 K  
 D1 2.00000000 sec  
 D11 0.03000000 sec  
 TD0 1

==== CHANNEL f1 =====

SFO1 100.6228298 MHz  
 NUC1 13C  
 P1 10.00 usec  
 PLW1 47.50000000 W

==== CHANNEL f2 =====

SFO2 400.1316005 MHz  
 NUC2 1H  
 CPDPRG[2] waltz16  
 PCPD2 90.00 usec  
 PLW2 15.00000000 W  
 PLW12 0.33750001 W  
 PLW13 0.27338001 W

F2 - Processing parameters

SI 32768  
 SF 100.6127490 MHz  
 WDW EM  
 SSB 0  
 LB 2.00 Hz  
 GB 0  
 PC 1.00

N-phenethyl-2-(2-phenyl-1H-indol-1-yl)benzamide (8j)

7.9420  
7.9288  
7.9234  
7.7191  
7.7137  
7.7035  
7.6968  
7.5084  
7.5033  
7.4912  
7.4859  
7.4731  
7.4689  
7.2692  
7.2646  
7.2536  
7.2466  
7.2392  
7.2314  
7.2241  
7.2149  
7.2090  
7.2028  
7.1949  
7.1915  
7.1825  
7.1783  
7.1741  
7.1695  
7.1047  
7.0998  
7.0917  
7.0871  
7.0808  
7.0758  
7.0638  
6.8570  
6.7999  
6.7926  
6.7812  
6.7766  
3.2486  
3.2443  
3.2395  
3.2352  
3.2301  
3.2258  
3.2213  
2.2775  
2.2593  
2.2412  
1.5620

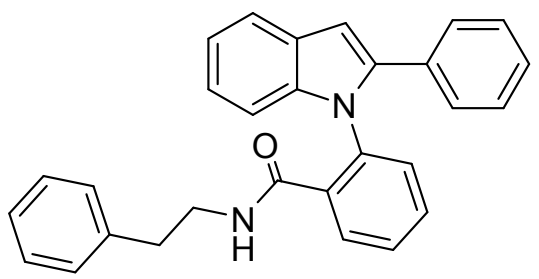

Current Data Parameters  
NAME Bharat  
EXPNO 187  
PROCNO 1

F2 - Acquisition Parameters  
Date\_ 20160202  
Time 13.47  
INSTRUM spect  
PROBHD 5 mm BBO BB-1H  
PULPROG zg30  
TD 32768  
SOLVENT CDCl3  
NS 32  
DS 0  
SWH 7246.377 Hz  
FIDRES 0.221142 Hz  
AQ 2.2609921 sec  
RG 228.1  
DW 69.000 usec  
DE 6.50 usec  
TE 297.4 K  
D1 2.00000000 sec  
TD0 1

===== CHANNEL f1 =====  
NUC1 1H  
P1 14.40 usec  
PL1 1.80 dB  
SFO1 400.1324008 MHz

F2 - Processing parameters  
SI 16384  
SF 400.1300118 MHz  
WDW EM  
SSB 0  
LB 0 Hz  
GB 0  
PC 1.00

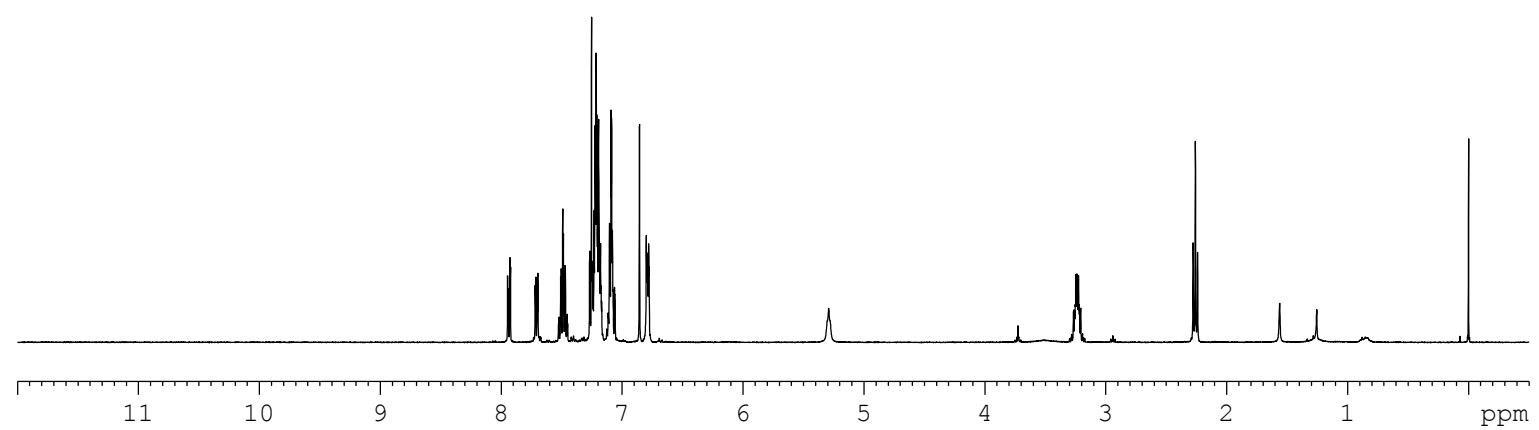

0.972  
1.046  
2.082  
1.623  
7.001  
3.951  
1.000  
1.978

0.982

2.065

2.029

N-phenethyl-2-(2-phenyl-1H-indol-1-yl)benzamide (8j)

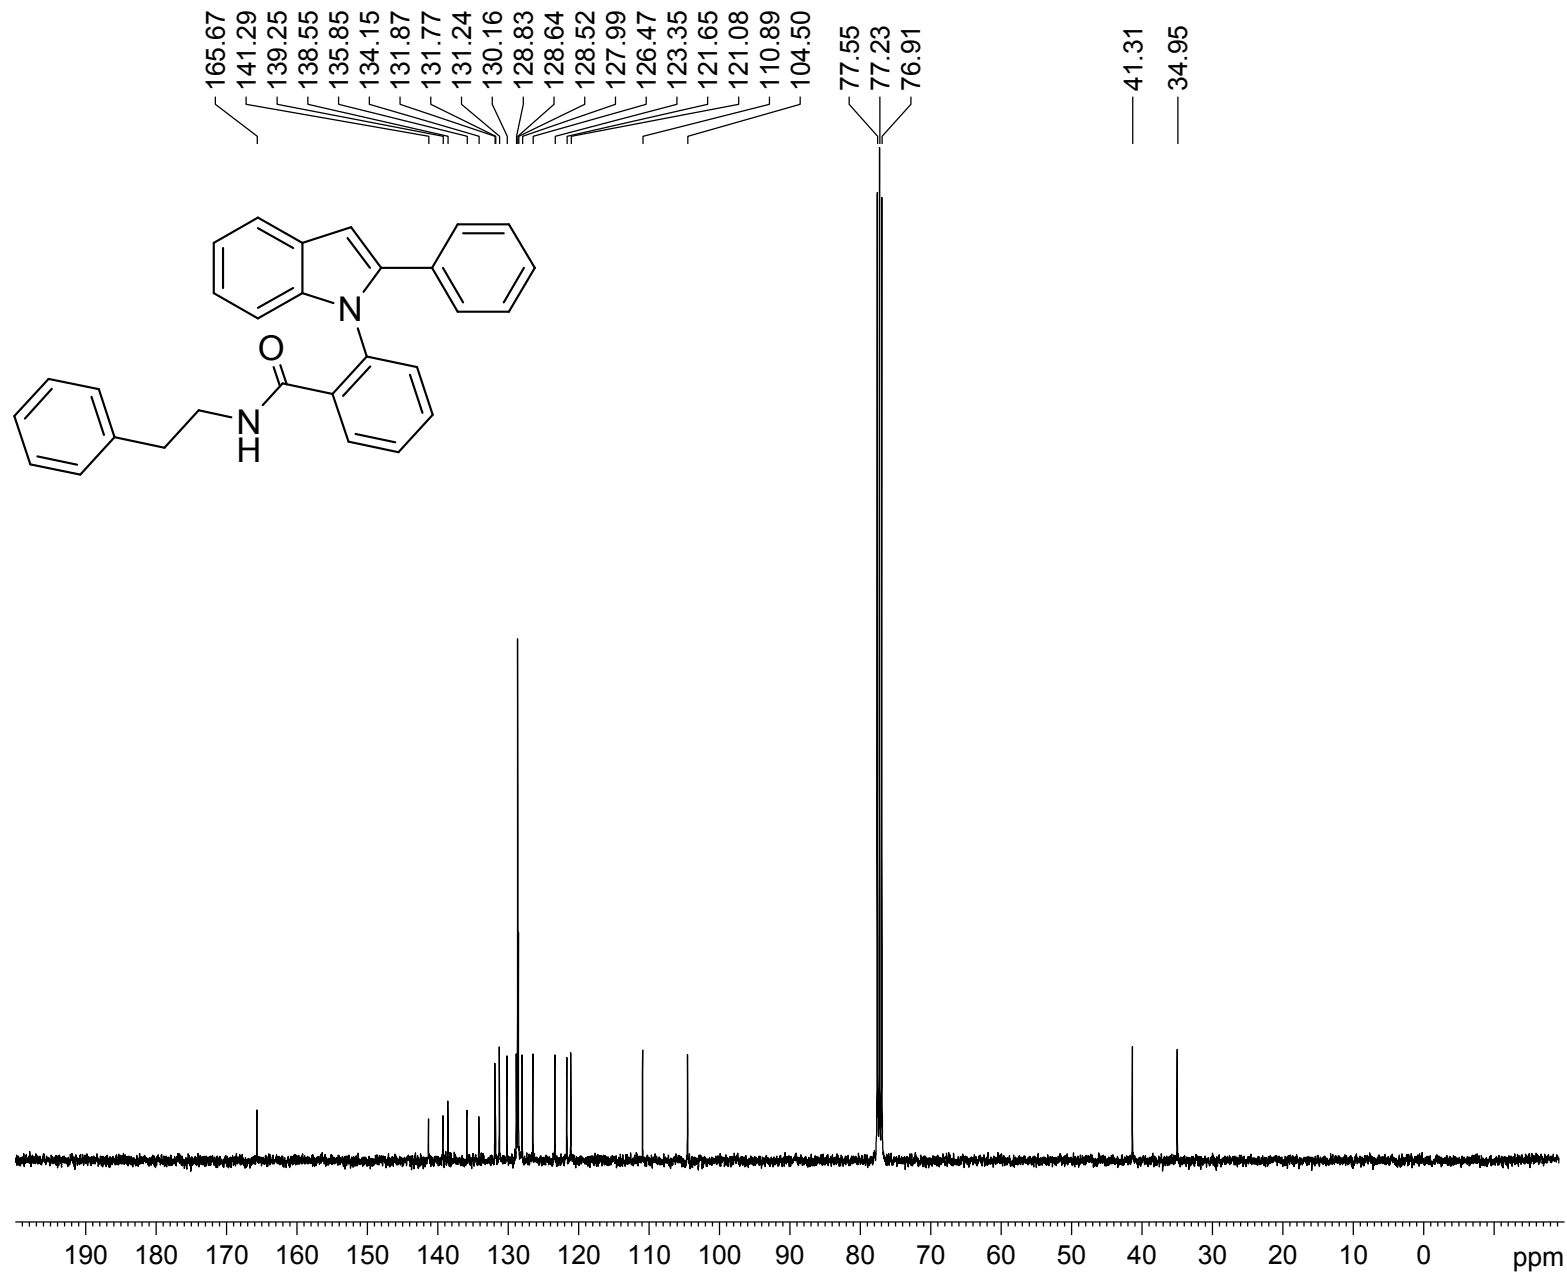

Current Data Parameters

NAME spiro1  
 EXPNO 165  
 PROCNO 1

F2 - Acquisition Parameters

Date\_ 20160209  
 Time 17.47  
 INSTRUM spect  
 PROBHD 5 mm PABBO BB/  
 PULPROG zgpg30  
 TD 32768  
 SOLVENT CDCl3  
 NS 453  
 DS 0  
 SWH 24038.461 Hz  
 FIDRES 0.733596 Hz  
 AQ 0.6815744 sec  
 RG 198.09  
 DW 20.800 usec  
 DE 6.50 usec  
 TE 297.6 K  
 D1 2.00000000 sec  
 D11 0.03000000 sec  
 TD0 1

==== CHANNEL f1 =====

SFO1 100.6228298 MHz  
 NUC1 13C  
 P1 10.00 usec  
 PLW1 47.50000000 W

==== CHANNEL f2 =====

SFO2 400.1316005 MHz  
 NUC2 1H  
 CPDPRG[2] waltz16  
 PCPD2 90.00 usec  
 PLW2 15.00000000 W  
 PLW12 0.33750001 W  
 PLW13 0.27338001 W

F2 - Processing parameters

SI 32768  
 SF 100.6127490 MHz  
 WDW EM  
 SSB 0  
 LB 2.00 Hz  
 GB 0  
 PC 1.00



2-(2-phenyl-1H-indol-1-yl)-N-(4-phenylbutyl)benzamide (8k)

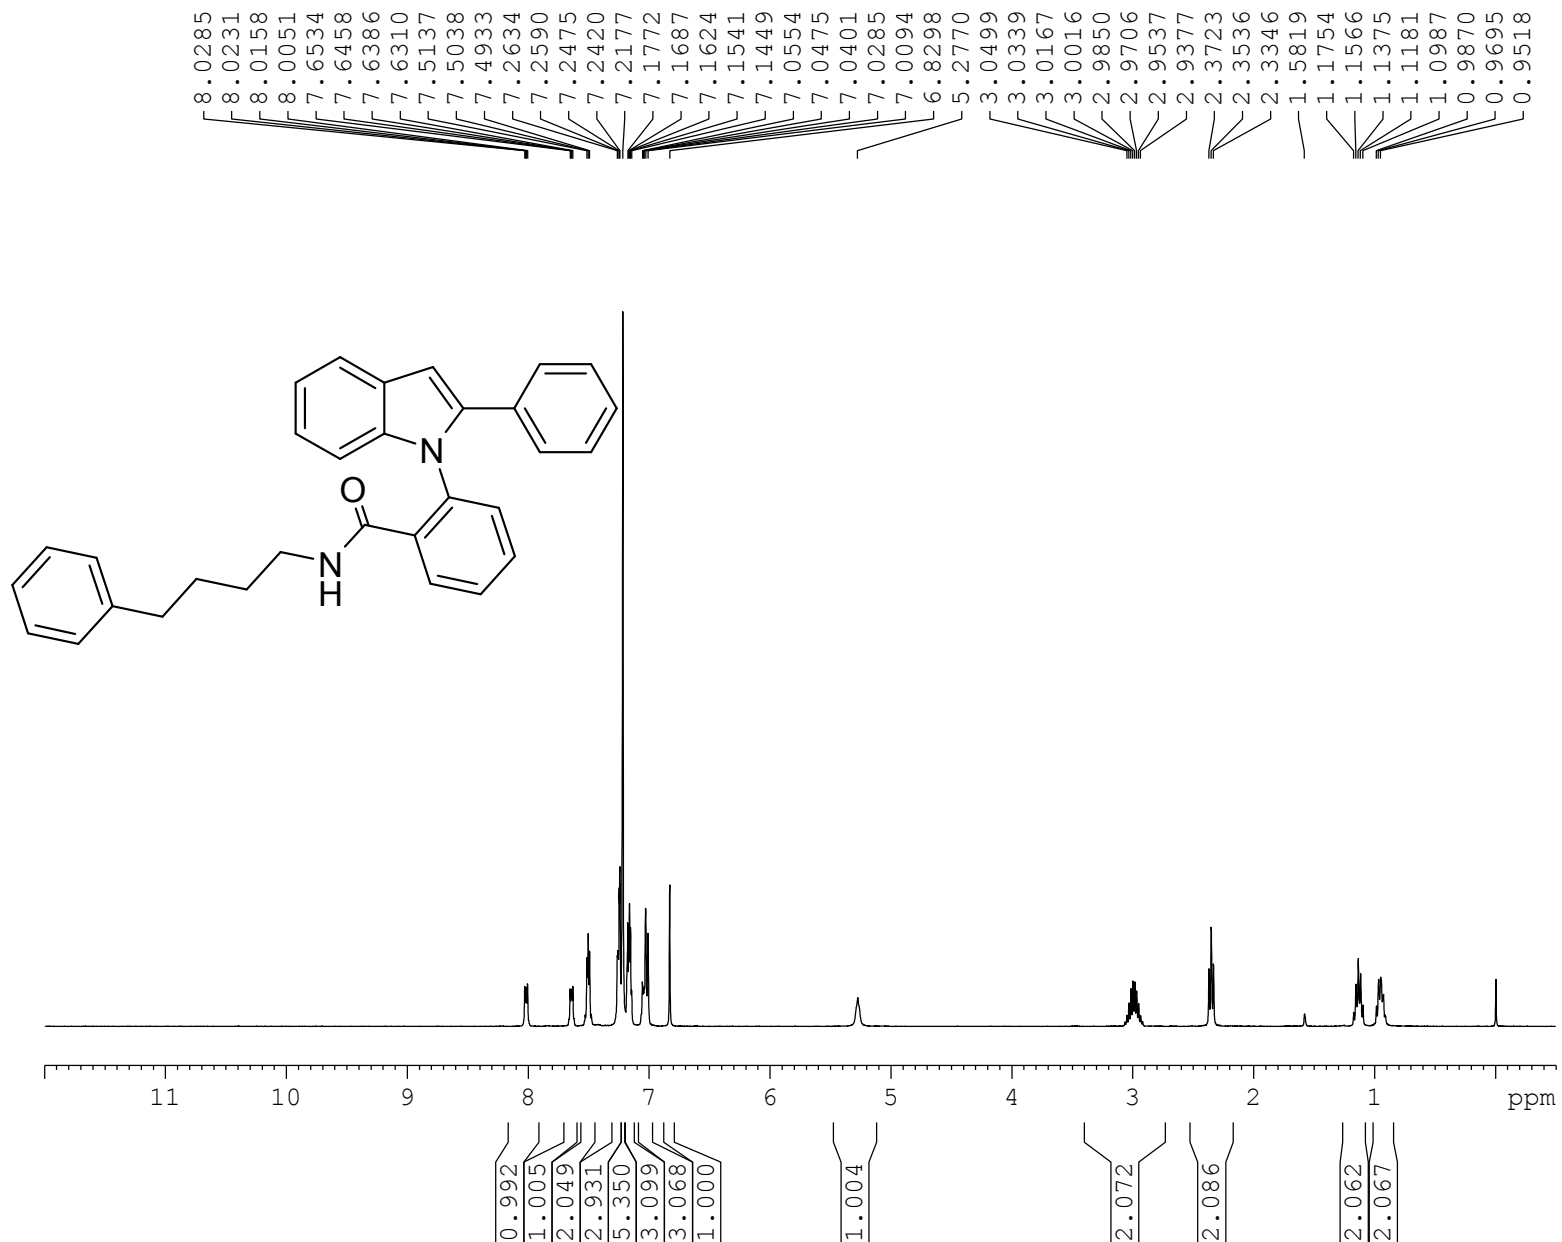

Current Data Parameters  
 NAME spiro1  
 EXPNO 182  
 PROCNO 1

F2 - Acquisition Parameters  
 Date\_ 20160209  
 Time 20.14  
 INSTRUM spect  
 PROBHD 5 mm PABBO BB/  
 PULPROG zg30  
 TD 32768  
 SOLVENT CDCl3  
 NS 32  
 DS 0  
 SWH 7211.539 Hz  
 FIDRES 0.220079 Hz  
 AQ 2.2719147 sec  
 RG 99.72  
 DW 69.333 usec  
 DE 10.50 usec  
 TE 297.0 K  
 D1 2.0000000 sec  
 D10 1

===== CHANNEL f1 =====  
 SFO1 400.1324008 MHz  
 NUC1 1H  
 P1 12.90 usec  
 PLW1 15.00000000 W

F2 - Processing parameters  
 SI 16384  
 SF 400.1300147 MHz  
 WDW EM  
 SSB 0  
 LB 0 Hz  
 GB 0  
 PC 1.00

2-(2-phenyl-1H-indol-1-yl)-N-(4-phenylbutyl)benzamide (8k)

165.40  
142.16  
141.19  
139.26  
135.74  
134.31  
131.87  
131.71  
131.44  
130.33  
129.00  
128.67  
128.59  
128.56  
128.41  
128.04  
125.91  
123.35  
121.65  
121.06  
110.78  
104.42  
77.55  
77.23  
76.91

39.88  
35.52  
28.51  
28.27

Current Data Parameters

NAME spiro1  
EXPNO 183  
PROCNO 1

F2 - Acquisition Parameters

Date\_ 20160209  
Time 20.18  
INSTRUM spect  
PROBHD 5 mm PABBO BB/  
PULPROG zgpg30  
TD 32768  
SOLVENT CDCI3  
NS 179  
DS 0  
SWH 24038.461 Hz  
FIDRES 0.733596 Hz  
AQ 0.6815744 sec  
RG 198.09  
DW 20.800 usec  
DE 6.50 usec  
TE 297.6 K  
D1 2.00000000 sec  
D11 0.03000000 sec  
TD0 1

==== CHANNEL f1 =====

SFO1 100.6228298 MHz  
NUC1 13C  
P1 10.00 usec  
PLW1 47.50000000 W

==== CHANNEL f2 =====

SFO2 400.1316005 MHz  
NUC2 1H  
CPDPRG[2] waltz16  
PCPD2 90.00 usec  
PLW2 15.00000000 W  
PLW12 0.33750001 W  
PLW13 0.27338001 W

F2 - Processing parameters

SI 32768  
SF 100.6127498 MHz  
WDW EM  
SSB 0  
LB 2.00 Hz  
GB 0  
PC 1.00

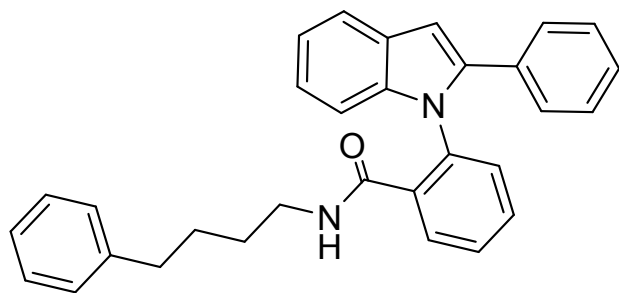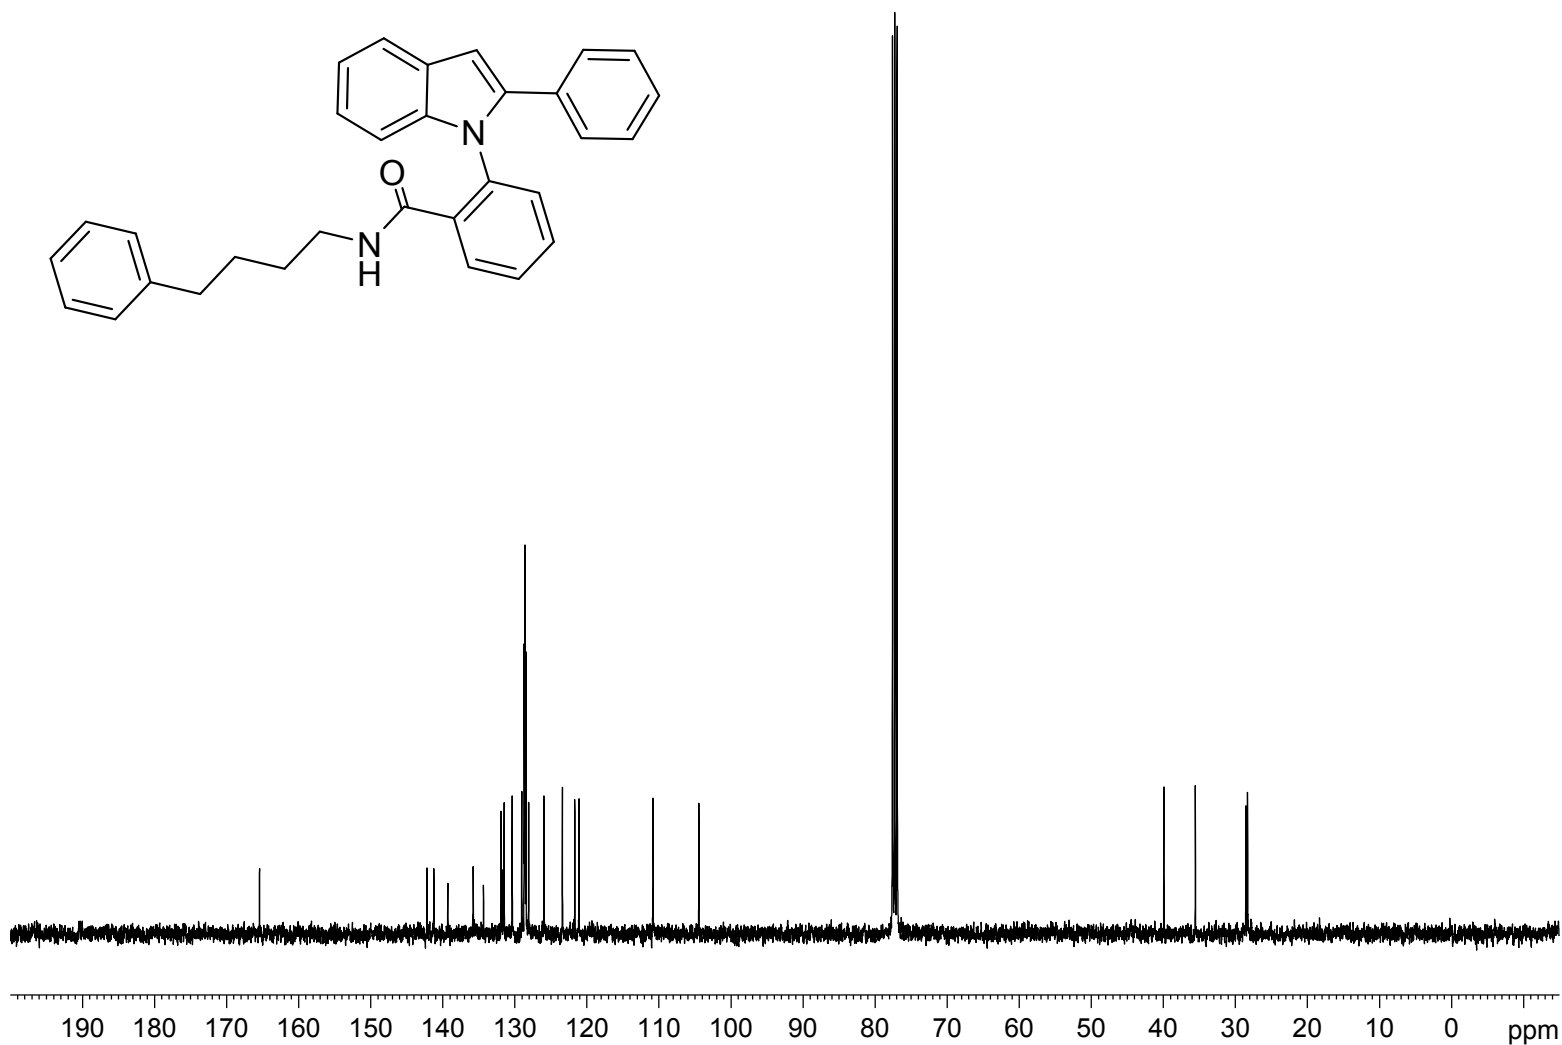

N-benzyl-2-(6-chloro-2-cyclopentyl-1H-indol-1-yl)benzamide (81)

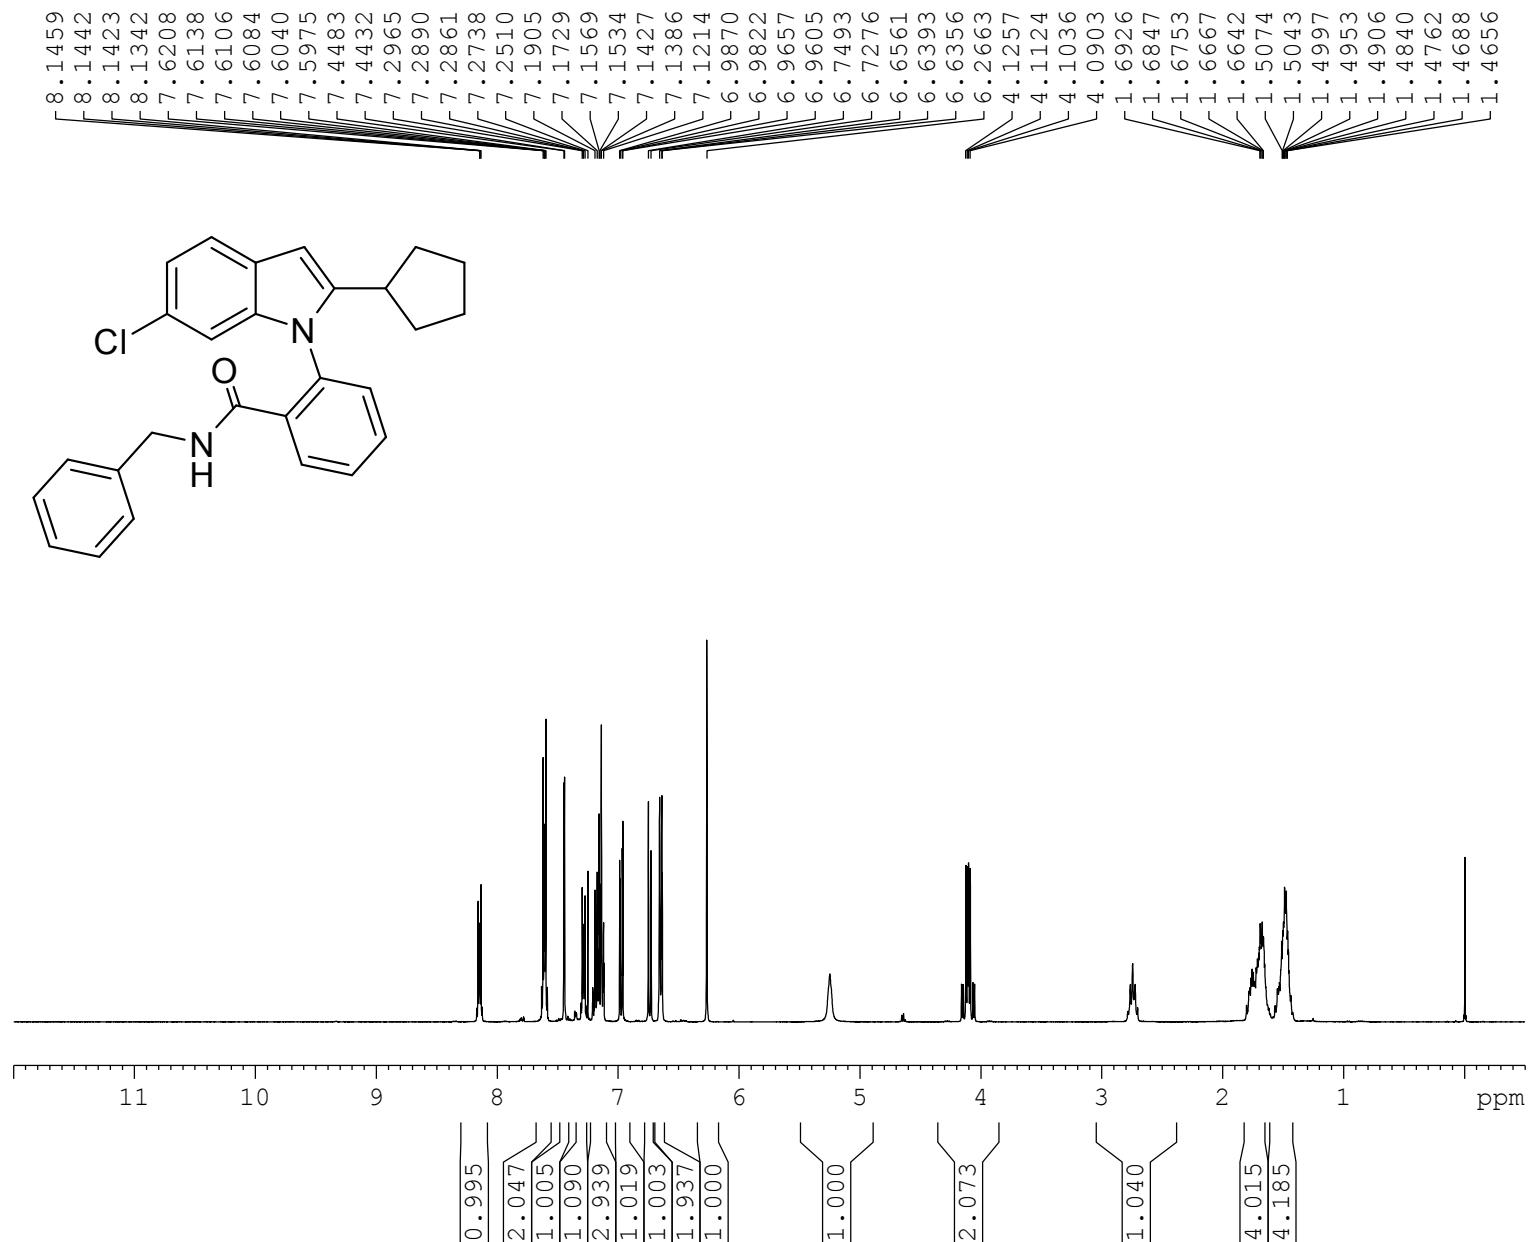

Current Data Parameters  
 NAME project 1  
 EXPNO 135  
 PROCNO 1

F2 - Acquisition Parameters  
 Date\_ 20151122  
 Time 6.07  
 INSTRUM spect  
 PROBHD 5 mm PABBO BB/  
 PULPROG zg30  
 TD 32768  
 SOLVENT CDCl3  
 NS 32  
 DS 0  
 SWH 7211.539 Hz  
 FIDRES 0.220079 Hz  
 AQ 2.2719147 sec  
 RG 63.58  
 DW 69.333 usec  
 DE 10.50 usec  
 TE 297.7 K  
 D1 2.00000000 sec  
 TD0 1

===== CHANNEL f1 =====  
 SFO1 400.1324008 MHz  
 NUC1 1H  
 P1 12.90 usec  
 PLW1 15.00000000 W

F2 - Processing parameters  
 SI 16384  
 SF 400.1300134 MHz  
 WDW EM  
 SSB 0  
 LB 0 Hz  
 GB 0  
 PC 1.00

N-benzyl-2-(6-chloro-2-cyclopentyl-1H-indol-1-yl)benzamide (81)

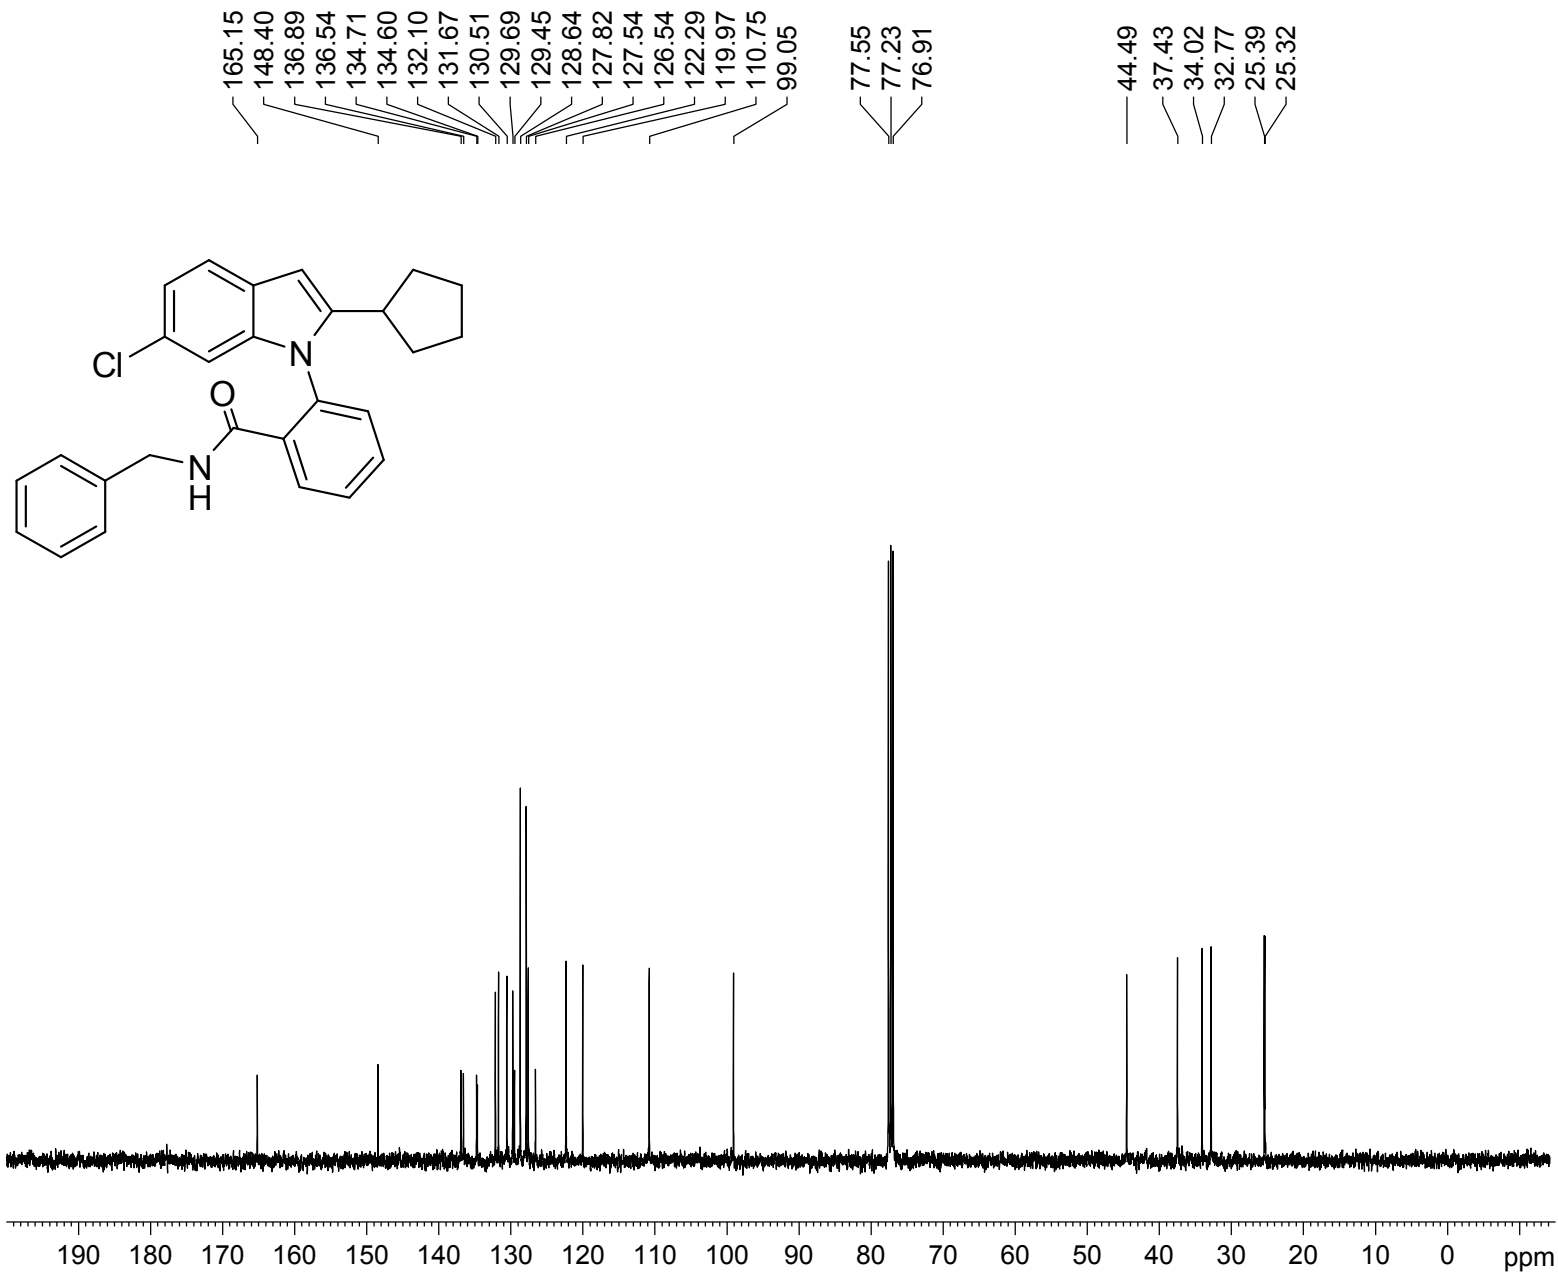

Current Data Parameters

NAME project 1  
EXPNO 136  
PROCNO 1

F2 - Acquisition Parameters

Date\_ 20151122  
Time 6.13  
INSTRUM spect  
PROBHD 5 mm PABBO BB/  
PULPROG zgpg30  
TD 32768  
SOLVENT CDCI3  
NS 85  
DS 0  
SWH 24038.461 Hz  
FIDRES 0.733596 Hz  
AQ 0.6815744 sec  
RG 198.09  
DW 20.800 usec  
DE 6.50 usec  
TE 298.4 K  
D1 2.00000000 sec  
D11 0.03000000 sec  
TD0 1

===== CHANNEL f1 =====

SFO1 100.6233319 MHz  
NUC1 13C  
P1 10.00 usec  
PLW1 47.50000000 W

===== CHANNEL f2 =====

SFO2 400.1316005 MHz  
NUC2 1H  
CPDPRG[2] waltz16  
PCPD2 90.00 usec  
PLW2 15.00000000 W  
PLW12 0.33750001 W  
PLW13 0.27338001 W

F2 - Processing parameters

SI 32768  
SF 100.6127516 MHz  
WDW EM  
SSB 0  
LB 2.00 Hz  
GB 0  
PC 1.00

2-(2-cyclohexyl-6-methyl-1H-indol-1-yl)-N-methylbenzamide (8m)

8.1933  
8.1887  
8.1755  
8.1699  
7.6318  
7.6271  
7.6146  
7.6089  
7.5997  
7.5959  
7.4895  
7.4695  
7.3353  
7.3306  
7.3134  
7.2593  
6.9778  
6.9579  
6.6831  
6.4109

4.9699

2.4617  
2.4496  
2.3612  
1.8465  
1.8145  
1.7453  
1.6388  
1.6106  
1.5786  
1.5557  
1.5316  
1.5239  
1.5009  
1.4930  
1.2698  
1.2631  
1.2400  
1.2123  
1.1892  
1.1591  
1.1173

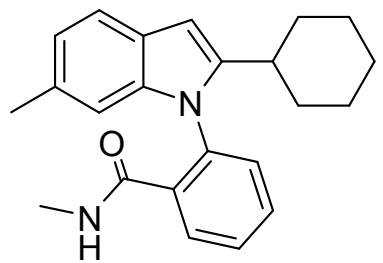

Current Data Parameters  
NAME project 1  
EXPNO 123  
PROCNO 1

F2 - Acquisition Parameters  
Date\_ 20151121  
Time 21.36  
INSTRUM spect  
PROBHD 5 mm PABBO BB/  
PULPROG zg30  
TD 32768  
SOLVENT CDCl3  
NS 32  
DS 0  
SWH 7211.539 Hz  
FIDRES 0.220079 Hz  
AQ 2.2719147 sec  
RG 198.09  
DW 69.333 usec  
DE 10.50 usec  
TE 298.2 K  
D1 2.00000000 sec  
TD0 1

===== CHANNEL f1 =====  
SFO1 400.1324008 MHz  
NUC1 1H  
P1 12.90 usec  
PLW1 15.00000000 W

F2 - Processing parameters  
SI 16384  
SF 400.1300103 MHz  
WDW EM  
SSB 0  
LB 0 Hz  
GB 0  
PC 1.00

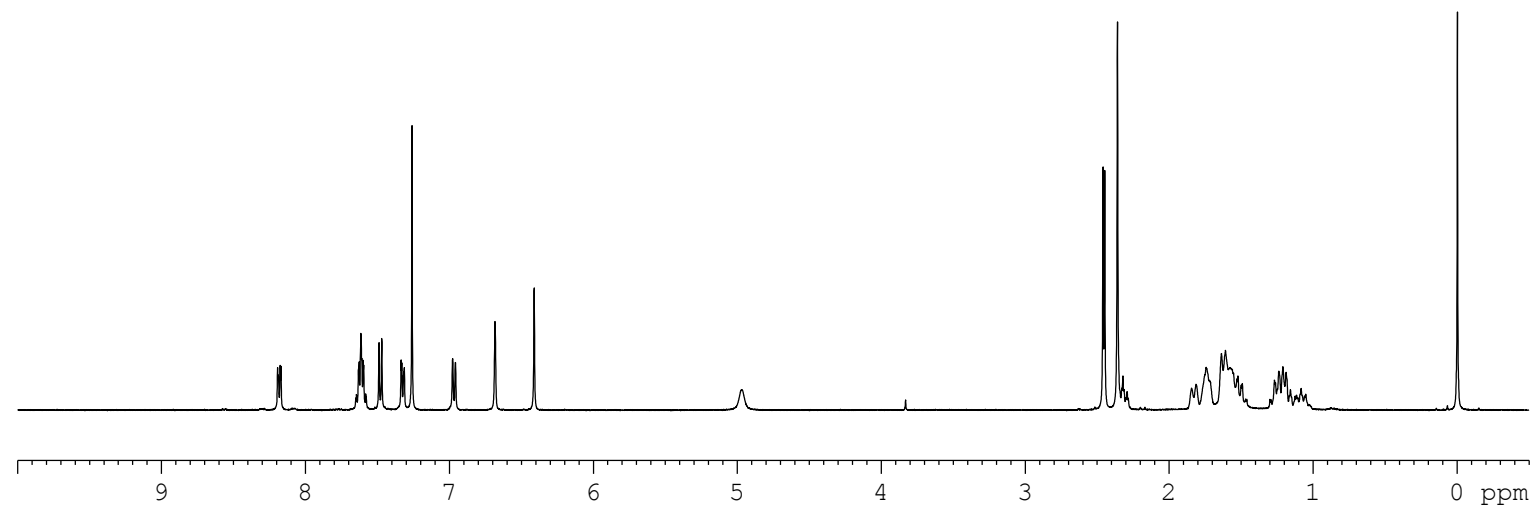

1.082  
2.147  
1.146  
1.013  
1.013  
0.991  
1.000  
0.966  
3.016  
3.080  
1.070  
2.191  
3.139  
1.074  
4.125

2-(2-cyclohexyl-6-methyl-1H-indol-1-yl)-N-methylbenzamide (8m)

166.23  
 147.40  
 138.27  
 135.19  
 134.14  
 132.14  
 132.03  
 131.85  
 130.35  
 129.28  
 126.40  
 122.71  
 120.11  
 110.04  
 99.49

77.55  
 77.23  
 76.91

35.75  
 34.79  
 32.56  
 27.01  
 26.51  
 26.44  
 26.16  
 21.92

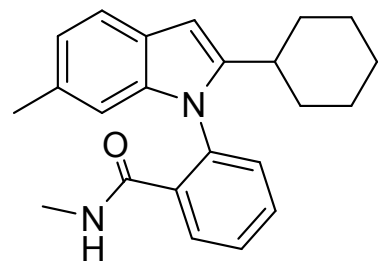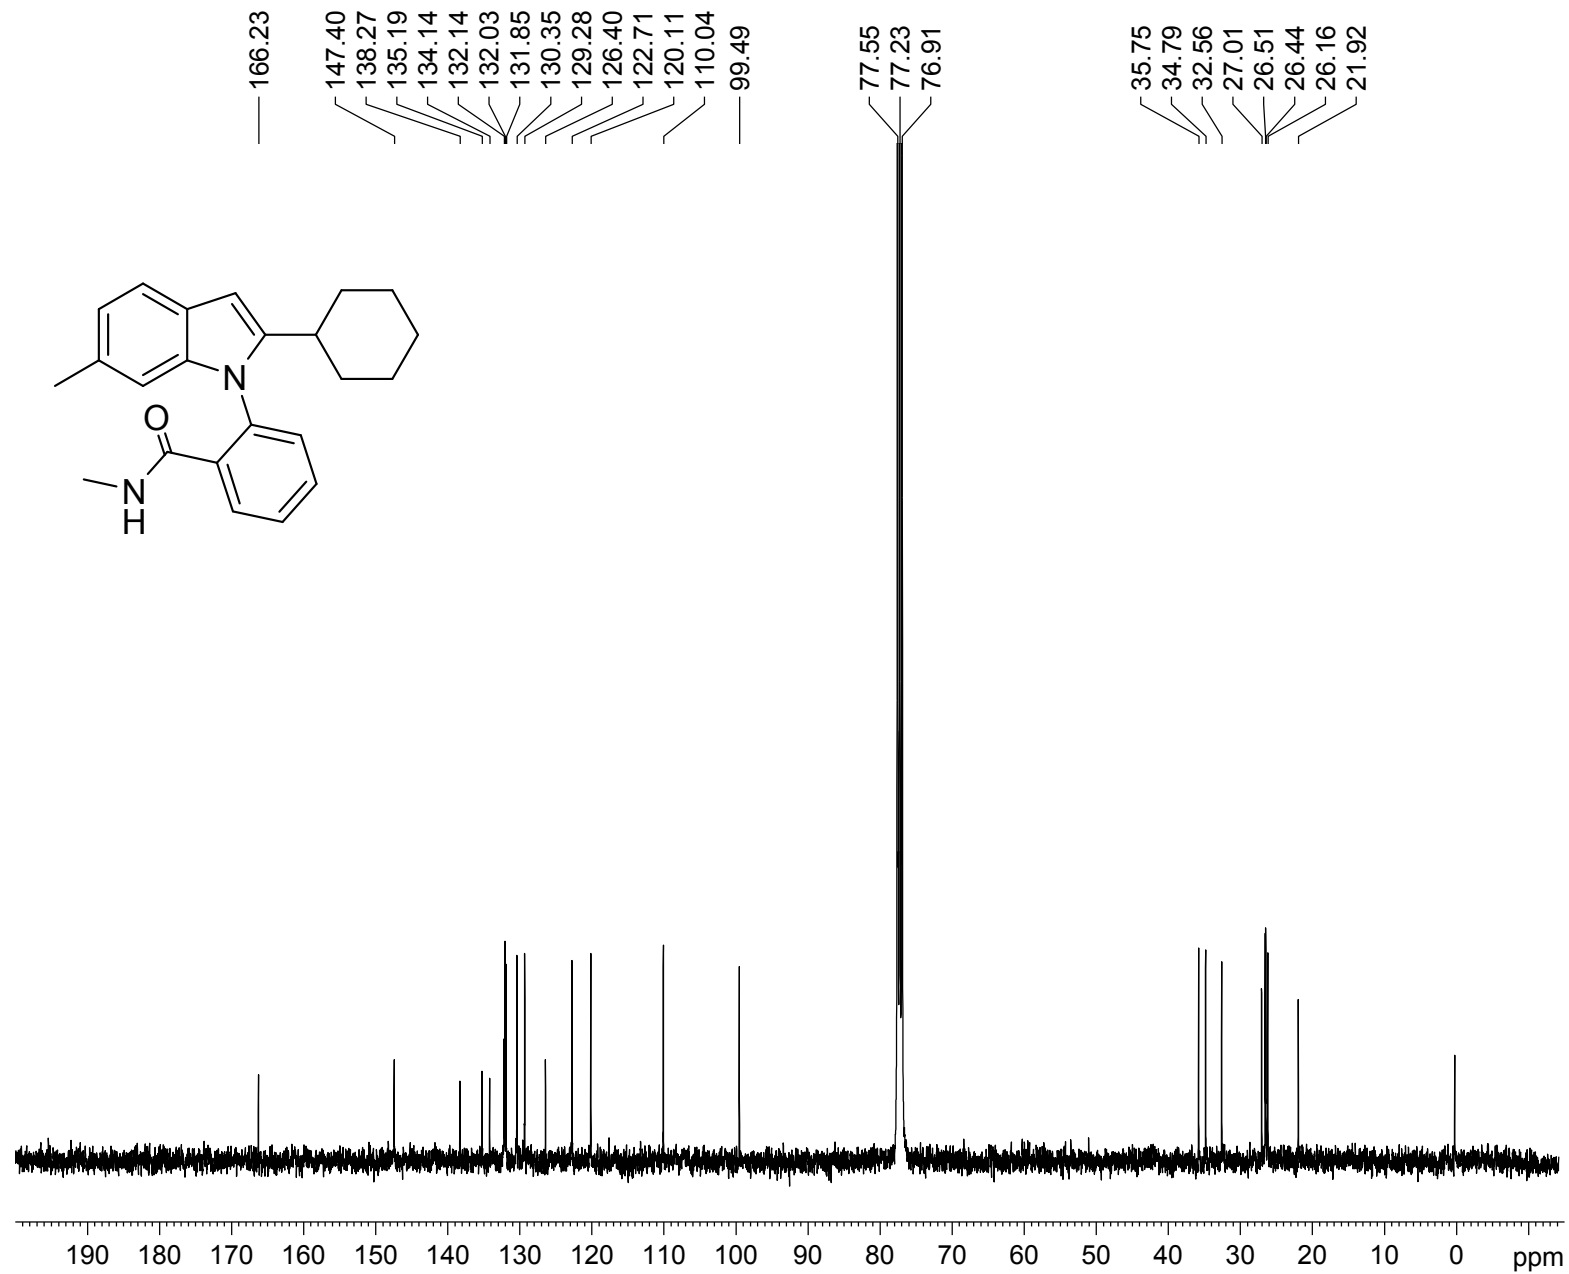

Current Data Parameters  
 NAME project 1  
 EXPNO 124  
 PROCNO 1

F2 - Acquisition Parameters  
 Date\_ 20151121  
 Time 21.39  
 INSTRUM spect  
 PROBHD 5 mm PABBO BB/  
 PULPROG zgpg30  
 TD 32768  
 SOLVENT CDCl3  
 NS 3878  
 DS 0  
 SWH 24038.461 Hz  
 FIDRES 0.733596 Hz  
 AQ 0.6815744 sec  
 RG 198.09  
 DW 20.800 usec  
 DE 6.50 usec  
 TE 298.1 K  
 D1 2.0000000 sec  
 D11 0.03000000 sec  
 TD0 1

==== CHANNEL f1 =====  
 SFO1 100.6233319 MHz  
 NUC1 13C  
 P1 10.00 usec  
 PLW1 47.50000000 W

==== CHANNEL f2 =====  
 SFO2 400.1316005 MHz  
 NUC2 1H  
 CPDPRG[2] waltz16  
 PCPD2 90.00 usec  
 PLW2 15.00000000 W  
 PLW12 0.33750001 W  
 PLW13 0.27338001 W

F2 - Processing parameters  
 SI 32768  
 SF 100.6127465 MHz  
 WDW EM  
 SSB 0  
 LB 2.00 Hz  
 GB 0  
 PC 1.00

N-benzyl-2-(2-isopropyl-5,7-dimethyl-1H-indol-1-yl)benzamide (8n)

8.2445  
8.2298  
8.2254  
7.6175  
7.6142  
7.5989  
7.5954  
7.5800  
7.5763  
7.5674  
7.5625  
7.5484  
7.5439  
7.5297  
7.5253  
7.3544  
7.3512  
7.3356  
7.3322  
7.2568  
7.1737  
7.1608  
7.1498  
7.1380  
7.1347  
7.1219  
7.1070  
7.1033  
7.0903  
7.0861  
7.0821  
6.6692  
6.6515  
6.6467  
6.2511  
5.5653  
4.1363  
4.1230  
4.1095  
4.0865  
2.5481  
2.5311  
2.5141  
2.4971  
2.4800  
2.3859  
1.7462  
1.5794  
1.0726  
1.0556  
1.0342  
1.0170

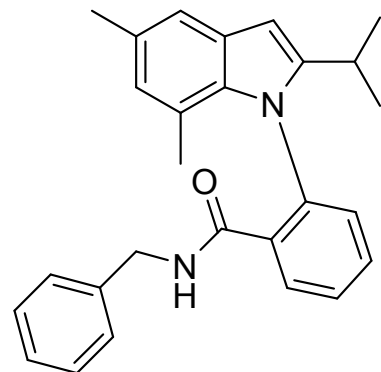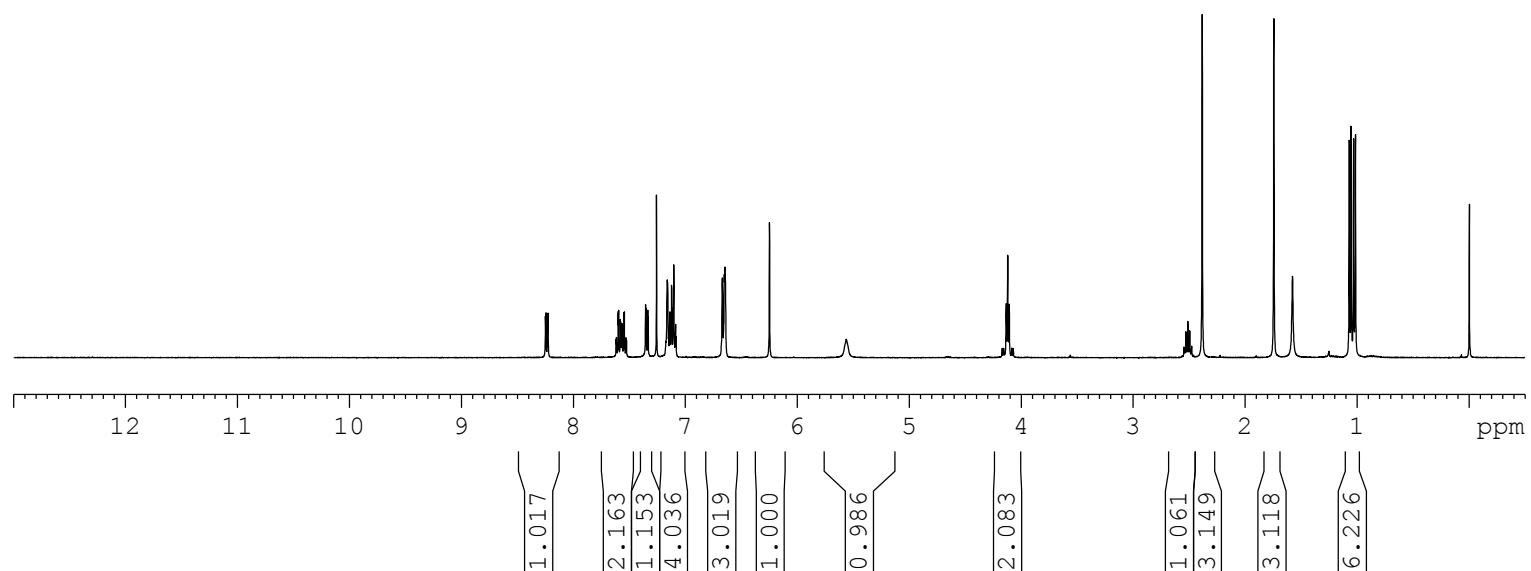

Current Data Parameters  
NAME project 1  
EXPNO 131  
PROCNO 1

F2 - Acquisition Parameters  
Date\_ 20151122  
Time 4.37  
INSTRUM spect  
PROBHD 5 mm PABBO BB/  
PULPROG zg30  
TD 32768  
SOLVENT CDCl3  
NS 32  
DS 0  
SWH 7211.539 Hz  
FIDRES 0.220079 Hz  
AQ 2.2719147 sec  
RG 128.9  
DW 69.333 usec  
DE 10.50 usec  
TE 298.0 K  
D1 2.00000000 sec  
TD0 1

===== CHANNEL f1 =====  
SFO1 400.1324008 MHz  
NUC1 1H  
P1 12.90 usec  
PLW1 15.00000000 W

F2 - Processing parameters  
SI 16384  
SF 400.1300112 MHz  
WDW EM  
SSB 0  
LB 0 Hz  
GB 0  
PC 1.00

N-benzyl-2-(2-isopropyl-5,7-dimethyl-1H-indol-1-yl)benzamide (8n)

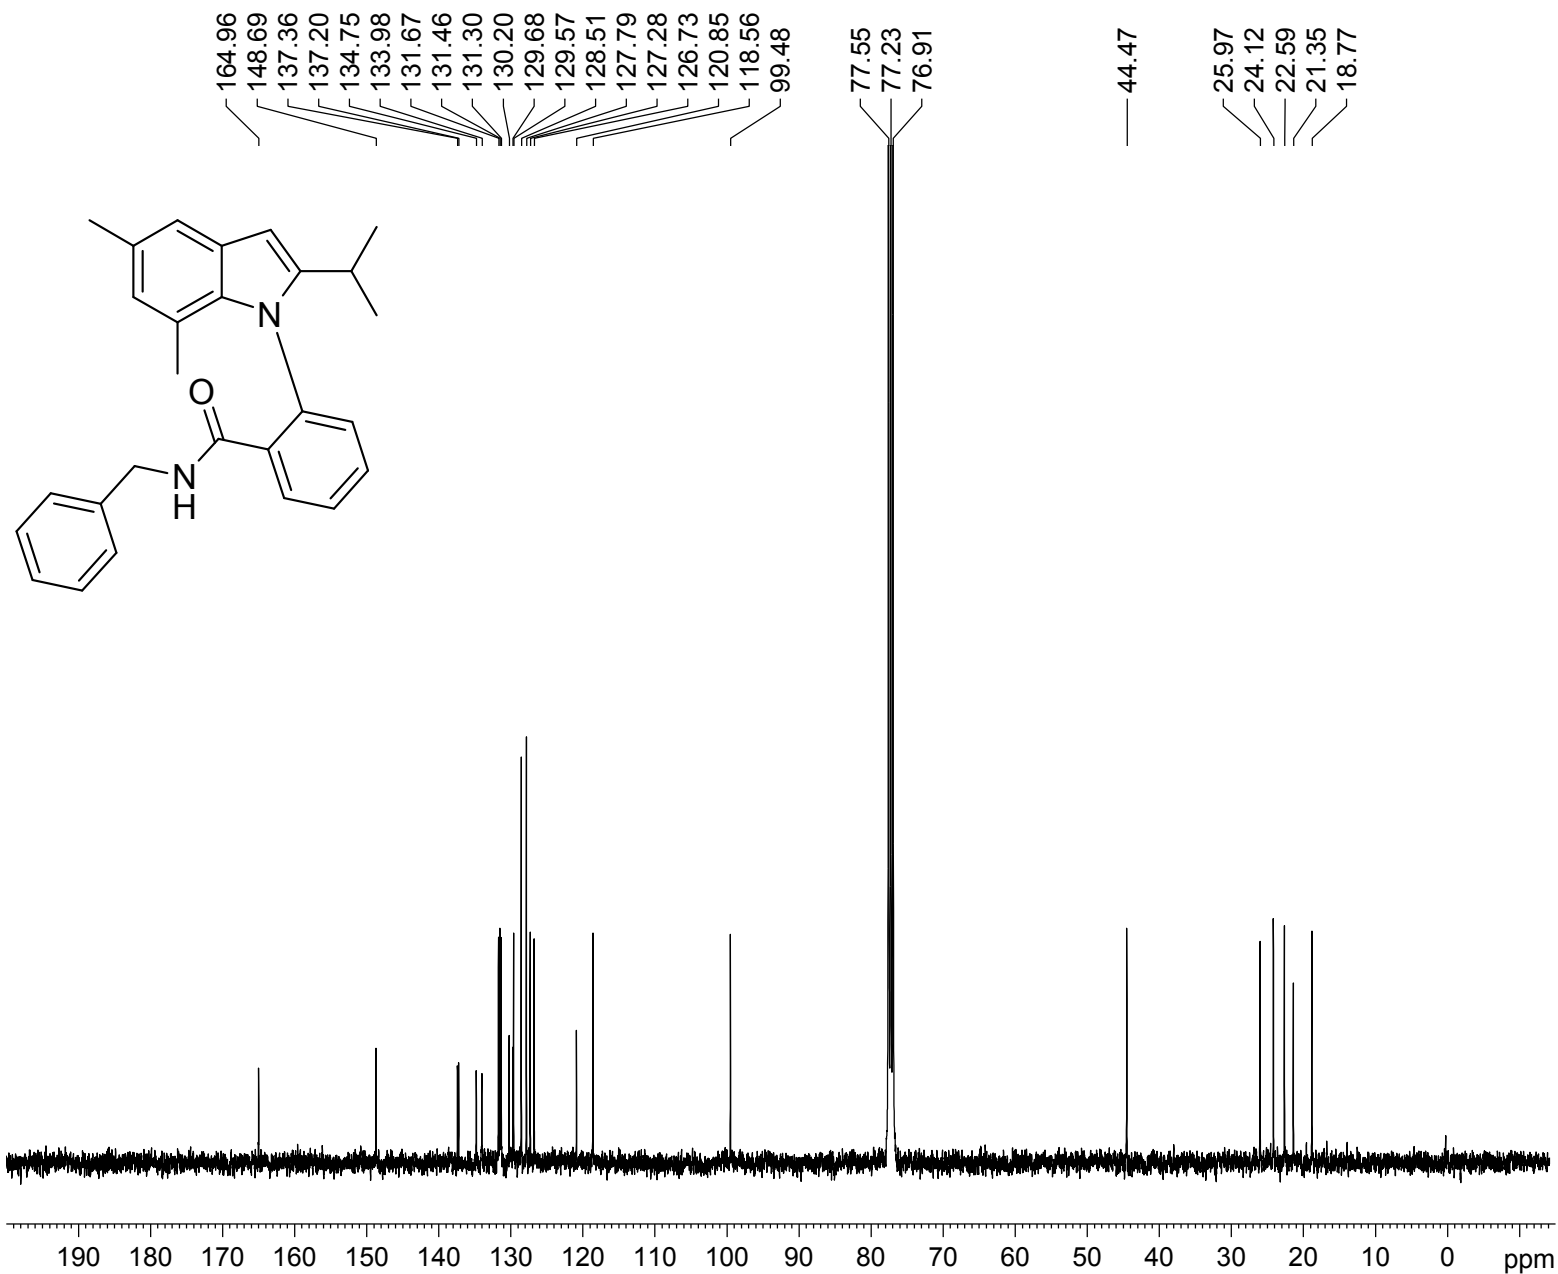

Current Data Parameters

NAME project 1  
 EXPNO 132  
 PROCNO 1

F2 - Acquisition Parameters

Date\_ 20151122  
 Time 4.42  
 INSTRUM spect  
 PROBHD 5 mm PABBO BB/  
 PULPROG zgpg30  
 TD 32768  
 SOLVENT CDCl3  
 NS 1470  
 DS 0  
 SWH 24038.461 Hz  
 FIDRES 0.733596 Hz  
 AQ 0.6815744 sec  
 RG 198.09  
 DW 20.800 usec  
 DE 6.50 usec  
 TE 297.9 K  
 D1 2.00000000 sec  
 D11 0.03000000 sec  
 TD0 1

==== CHANNEL f1 =====

SFO1 100.6233319 MHz  
 NUC1 13C  
 P1 10.00 usec  
 PLW1 47.50000000 W

==== CHANNEL f2 =====

SFO2 400.1316005 MHz  
 NUC2 1H  
 CPDPRG[2] waltz16  
 PCPD2 90.00 usec  
 PLW2 15.00000000 W  
 PLW12 0.33750001 W  
 PLW13 0.27338001 W

F2 - Processing parameters

SI 32768  
 SF 100.6127472 MHz  
 WDW EM  
 SSB 0  
 LB 2.00 Hz  
 GB 0  
 PC 1.00



N-benzyl-2-(5-methoxy-2-(methoxymethyl)-1H-indol-1-yl)benzamide (8o)

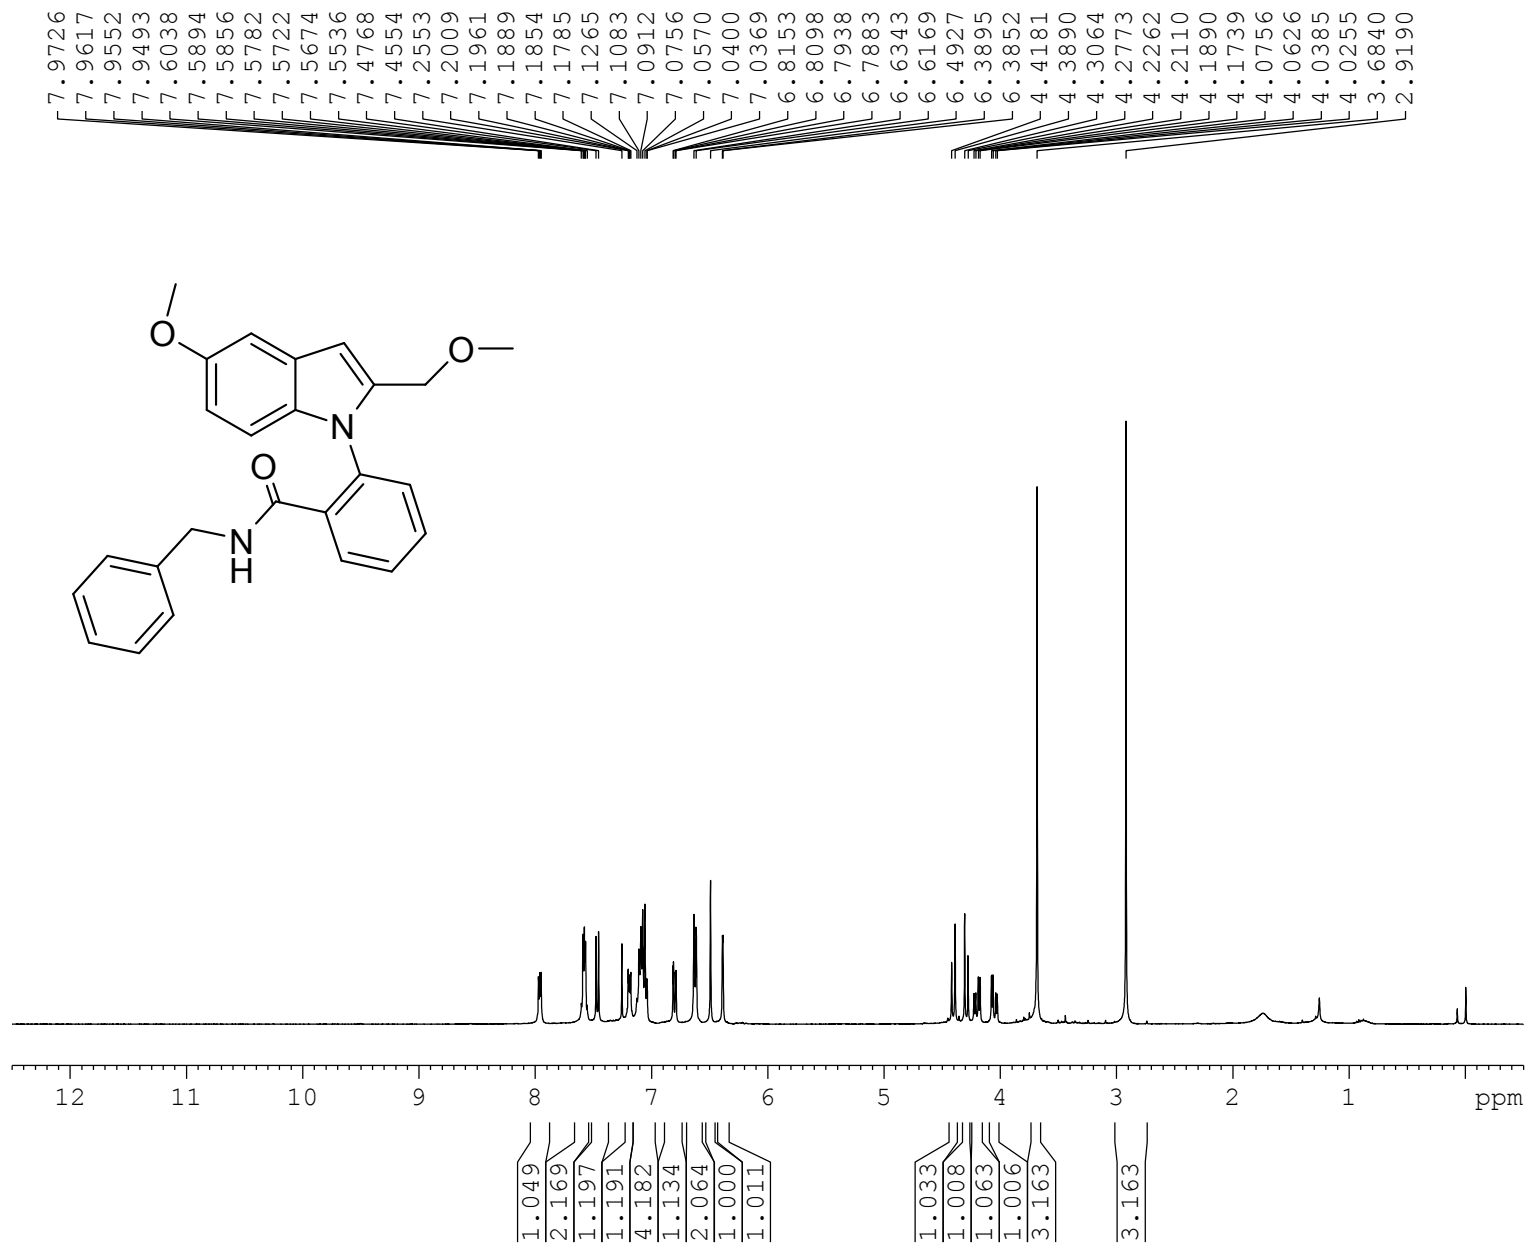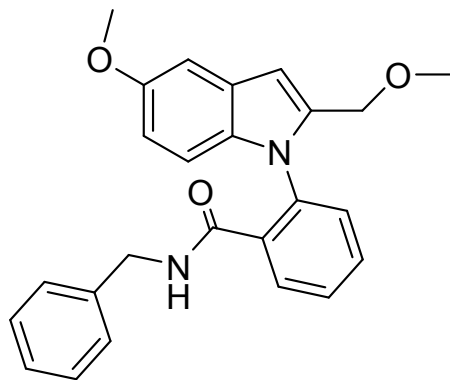

Current Data Parameters  
NAME project 1  
EXPNO 151  
PROCNO 1

F2 - Acquisition Parameters  
Date\_ 20151230  
Time 14.10  
INSTRUM spect  
PROBHD 5 mm PABBO BB/  
PULPROG zg30  
TD 32768  
SOLVENT CDCl3  
NS 32  
DS 0  
SWH 7211.539 Hz  
FIDRES 0.220079 Hz  
AQ 2.2719147 sec  
RG 78.51  
DW 69.333 usec  
DE 10.50 usec  
TE 298.0 K  
D1 2.0000000 sec  
TD0 1

===== CHANNEL f1 =====  
SFO1 400.1324008 MHz  
NUC1 1H  
P1 12.90 usec  
PLW1 15.00000000 W

F2 - Processing parameters  
SI 16384  
SF 400.1300120 MHz  
WDW EM  
SSB 0  
LB 0 Hz  
GB 0  
PC 1.00

N-benzyl-2-(5-methoxy-2-(methoxymethyl)-1H-indol-1-yl)benzamide (8o)

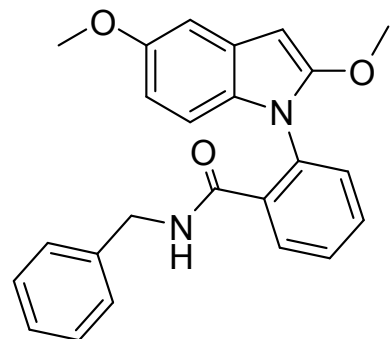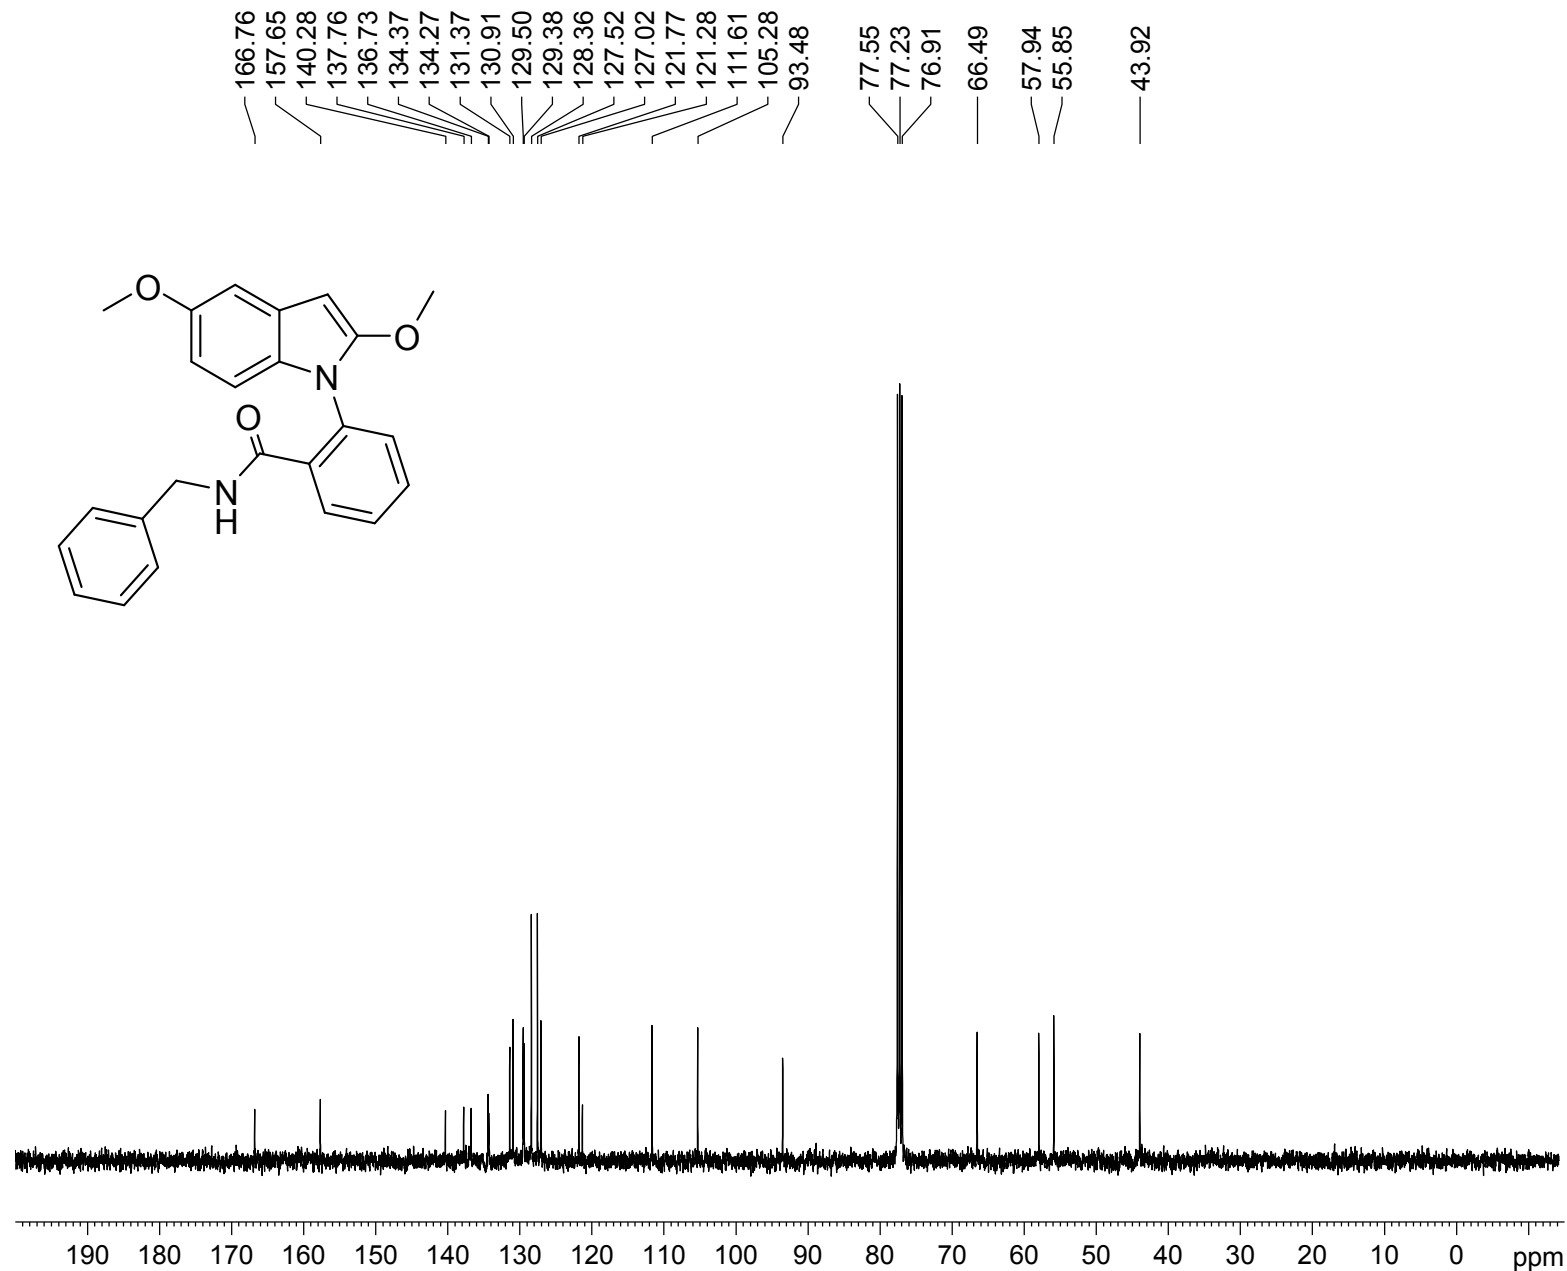

Current Data Parameters

NAME project 1  
EXPNO 152  
PROCNO 1

F2 - Acquisition Parameters

Date\_ 20151230  
Time 14.16  
INSTRUM spect  
PROBHD 5 mm PABBO BB/  
PULPROG zgpg30  
TD 32768  
SOLVENT CDCl3  
NS 103  
DS 0  
SWH 24038.461 Hz  
FIDRES 0.733596 Hz  
AQ 0.6815744 sec  
RG 198.09  
DW 20.800 usec  
DE 6.50 usec  
TE 298.6 K  
D1 2.00000000 sec  
D11 0.03000000 sec  
TD0 1

===== CHANNEL f1 =====

SFO1 100.6233319 MHz  
NUC1 13C  
P1 10.00 usec  
PLW1 47.50000000 W

===== CHANNEL f2 =====

SFO2 400.1316005 MHz  
NUC2 1H  
CPDPRG[2] waltz16  
PCPD2 90.00 usec  
PLW2 15.00000000 W  
PLW12 0.33750001 W  
PLW13 0.27338001 W

F2 - Processing parameters

SI 32768  
SF 100.6127501 MHz  
WDW EM  
SSB 0  
LB 2.00 Hz  
GB 0  
PC 1.00

N-benzyl-2-(6-methoxy-2-phenyl-1H-indol-1-yl)benzamide (8p)

8.0618  
8.0570  
8.0529  
8.0450  
8.0382  
7.5397  
7.5267  
7.5195  
7.5114  
7.5027  
7.4984  
7.4967  
7.4819  
7.2659  
7.2598  
7.2513  
7.2467  
7.2433  
7.1899  
7.1838  
7.1790  
7.1742  
7.1675  
7.1575  
7.1531  
7.1479  
7.1291  
7.1213  
7.1180  
7.1131  
7.1080  
7.1035  
7.0972  
6.8519  
6.8464  
6.8312  
6.8258  
6.7514  
6.7345  
6.6843  
6.4613  
6.4563  
5.6629  
4.2406  
4.2265  
4.2041  
4.1900  
4.1665  
4.1534  
4.1300  
4.1169  
3.6836  
1.6052

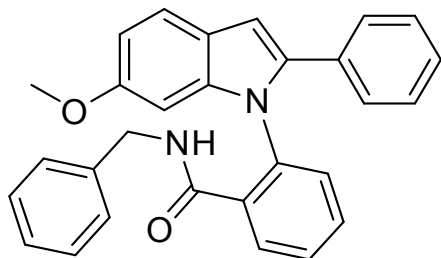

Current Data Parameters  
NAME project 1  
EXPNO 127  
PROCNO 1

F2 - Acquisition Parameters  
Date\_ 20151122  
Time 2.35  
INSTRUM spect  
PROBHD 5 mm PABBO BB/  
PULPROG zg30  
TD 32768  
SOLVENT CDCl3  
NS 32  
DS 0  
SWH 7211.539 Hz  
FIDRES 0.220079 Hz  
AQ 2.2719147 sec  
RG 78.51  
DW 69.333 usec  
DE 10.50 usec  
TE 298.5 K  
D1 2.00000000 sec  
TD0 1

==== CHANNEL f1 =====  
SFO1 400.1324008 MHz  
NUC1 1H  
P1 12.90 usec  
PLW1 15.00000000 W

F2 - Processing parameters  
SI 16384  
SF 400.1300151 MHz  
WDW EM  
SSB 0  
LB 0 Hz  
GB 0  
PC 1.00

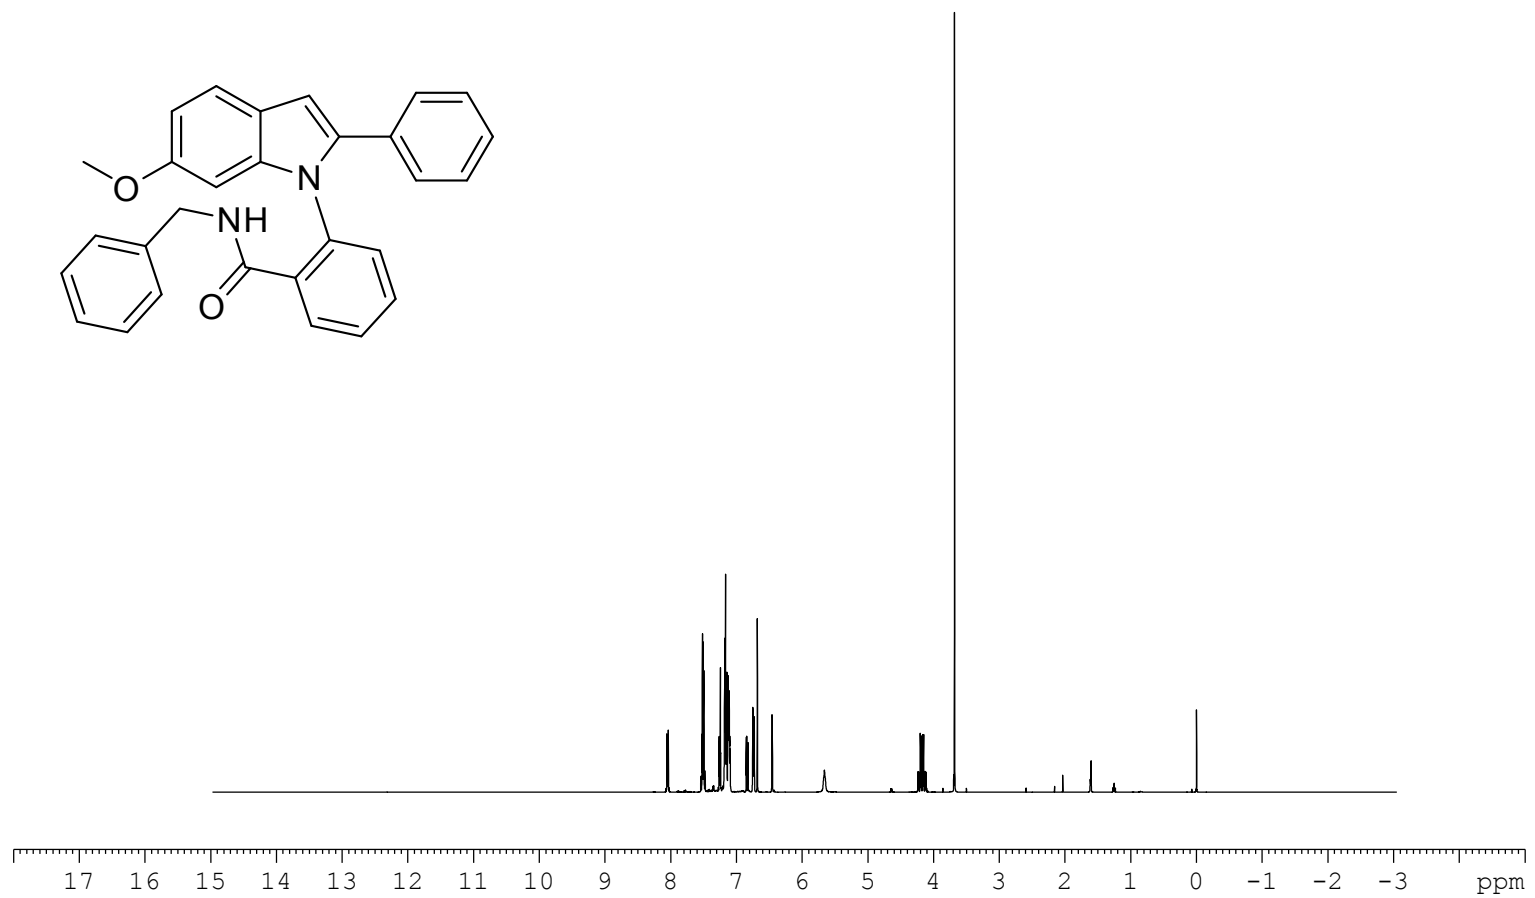

0.990  
3.021  
1.173  
4.027  
3.007  
1.006  
1.925  
0.983  
1.000  
1.011  
2.086  
3.072

N-benzyl-2-(6-methoxy-2-phenyl-1H-indol-1-yl)benzamide (8p)

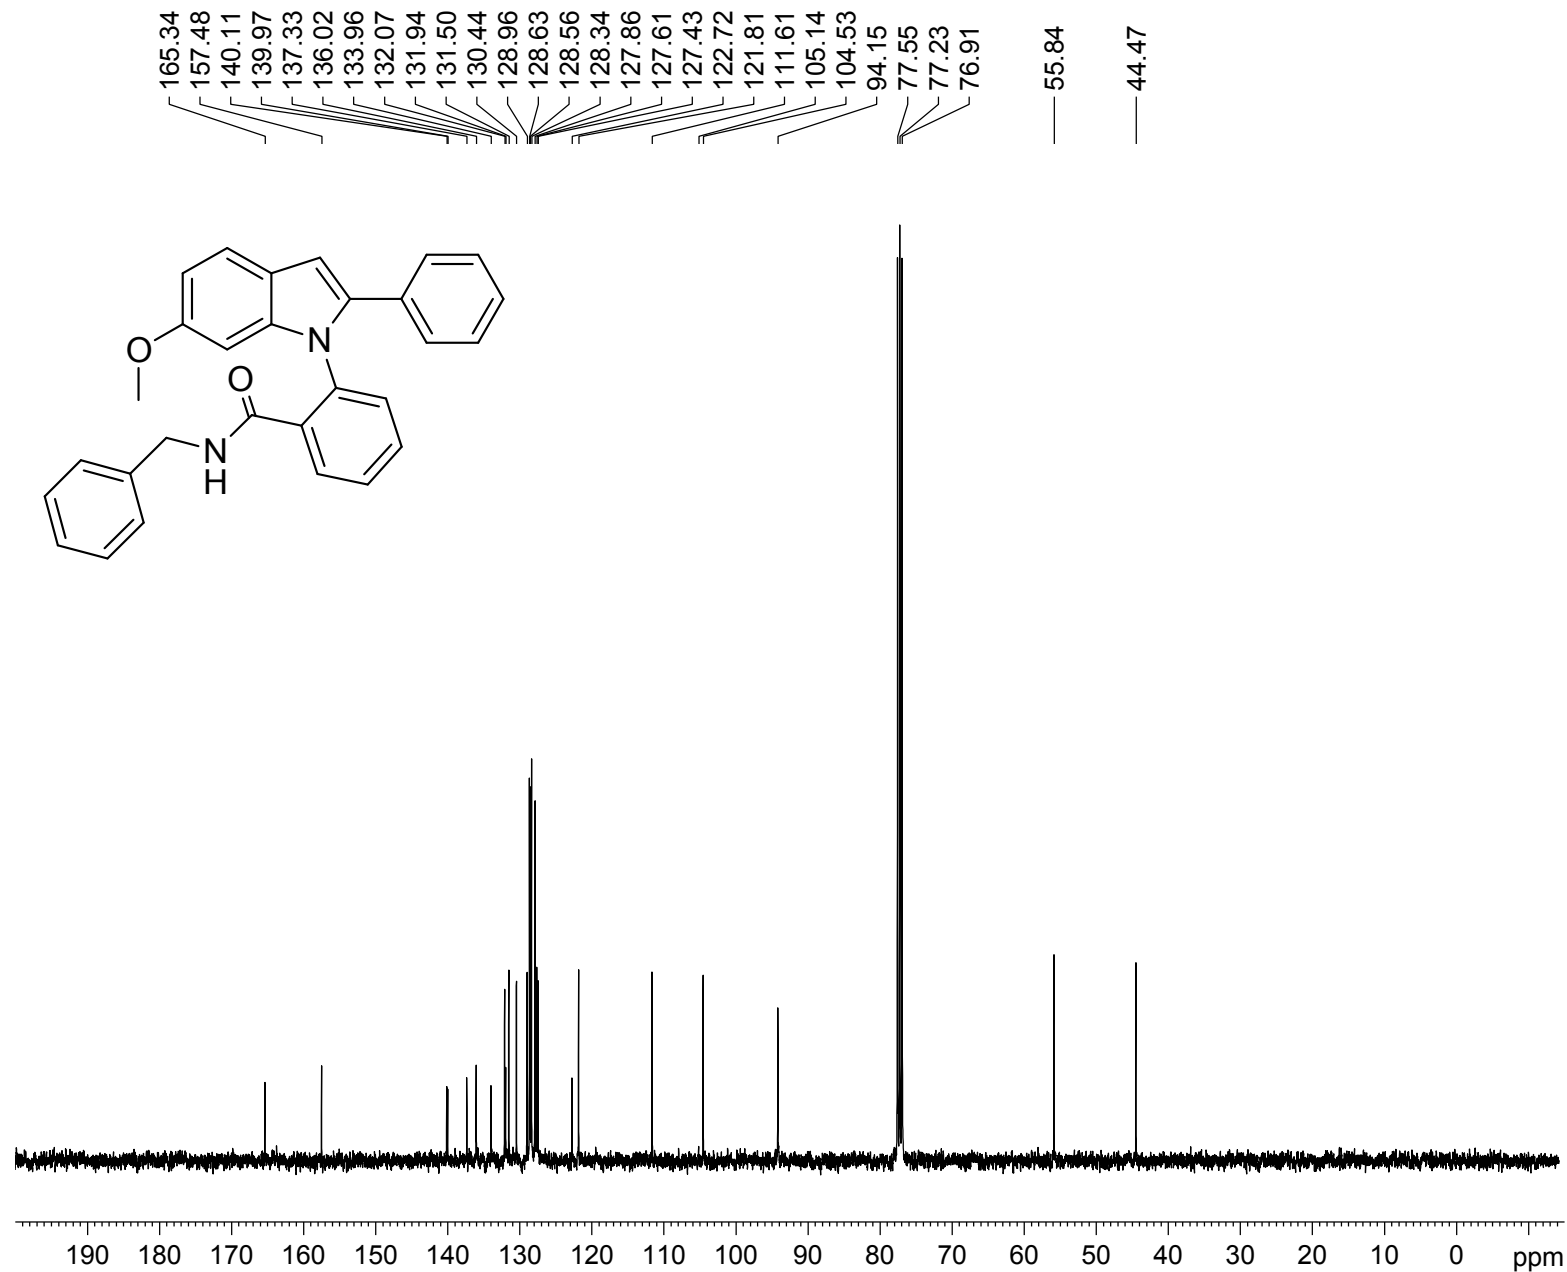

Current Data Parameters

NAME project 1  
EXPNO 128  
PROCNO 1

F2 - Acquisition Parameters

Date\_ 20151122  
Time 2.41  
INSTRUM spect  
PROBHD 5 mm PABBO BB/  
PULPROG zgpg30  
TD 32768  
SOLVENT CDCl3  
NS 163  
DS 0  
SWH 24038.461 Hz  
FIDRES 0.733596 Hz  
AQ 0.6815744 sec  
RG 198.09  
DW 20.800 usec  
DE 6.50 usec  
TE 299.2 K  
D1 2.00000000 sec  
D11 0.03000000 sec  
TD0 1

===== CHANNEL f1 =====

SFO1 100.6233319 MHz  
NUC1 13C  
P1 10.00 usec  
PLW1 47.50000000 W

===== CHANNEL f2 =====

SFO2 400.1316005 MHz  
NUC2 1H  
CPDPRG[2] waltz16  
PCPD2 90.00 usec  
PLW2 15.00000000 W  
PLW12 0.33750001 W  
PLW13 0.27338001 W

F2 - Processing parameters

SI 32768  
SF 100.6127501 MHz  
WDW EM  
SSB 0  
LB 2.00 Hz  
GB 0  
PC 1.00

N-benzyl-2-(6-methyl-2-phenyl-1H-indol-1-yl)benzamide (8q)

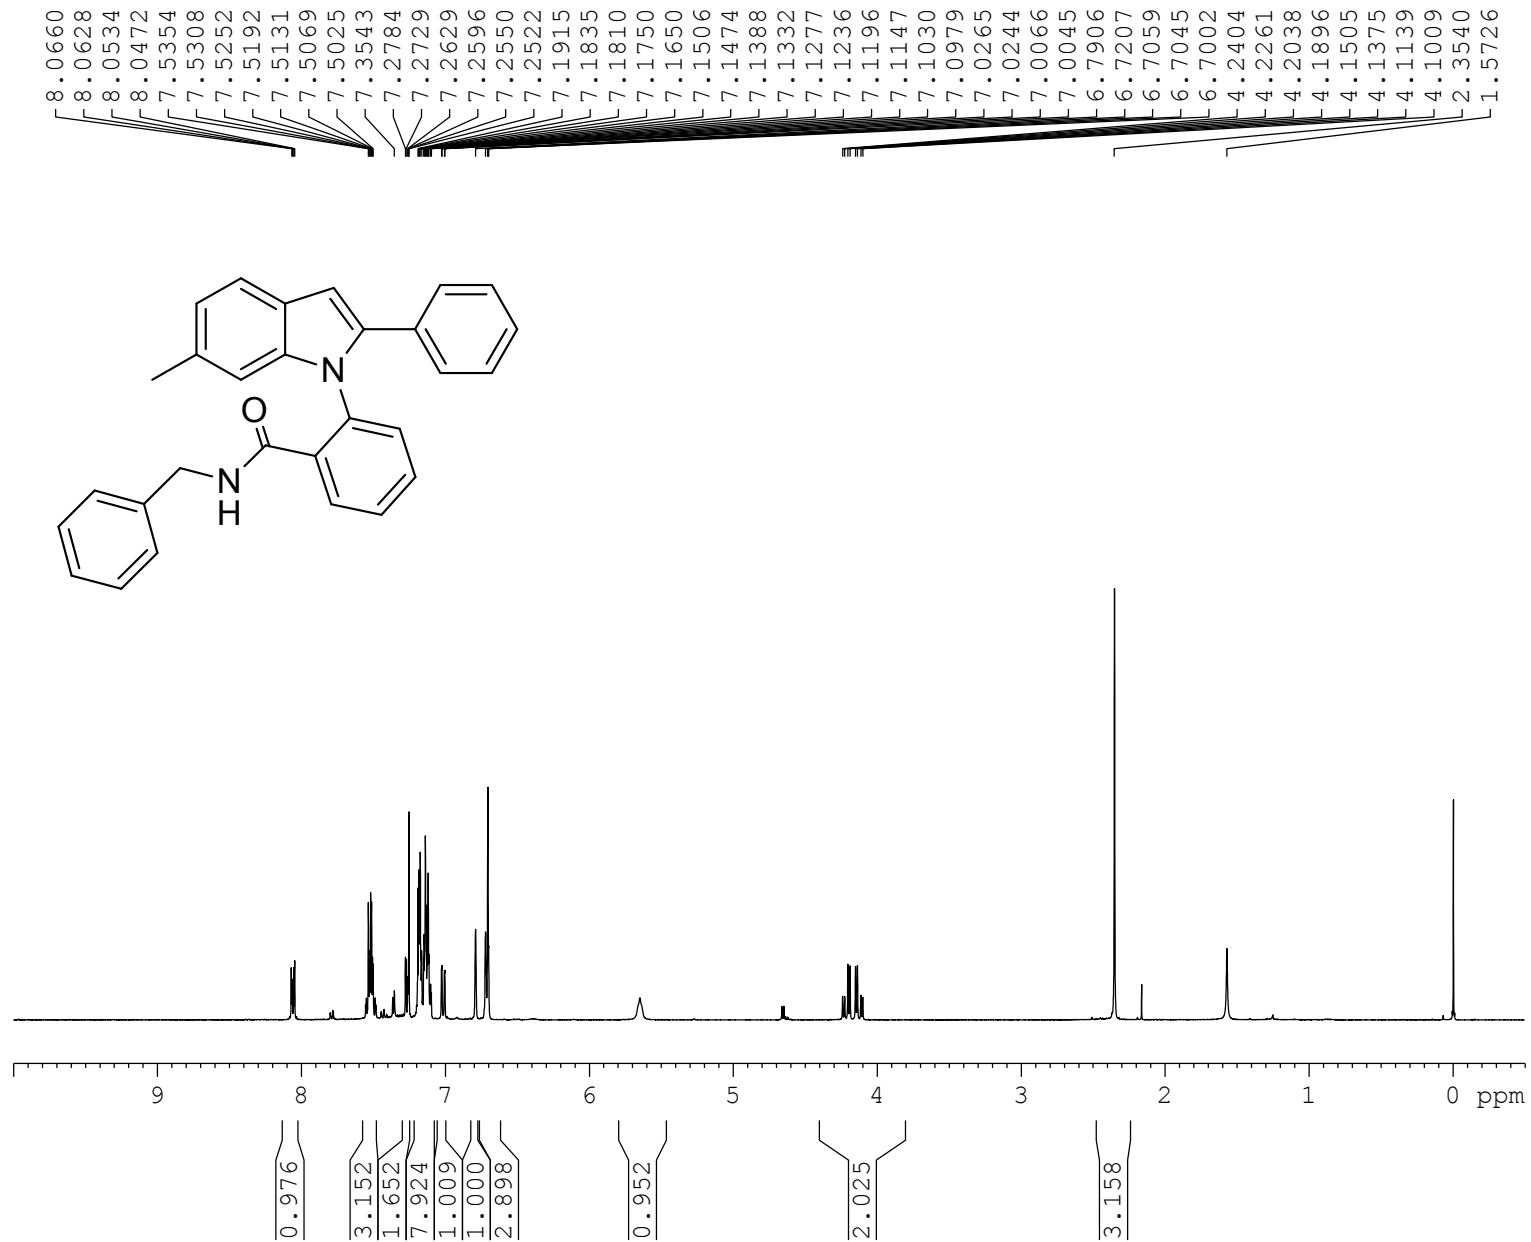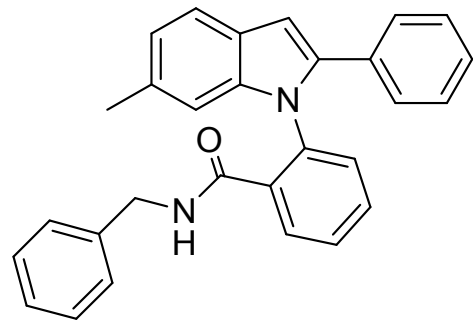

Current Data Parameters  
NAME project 1  
EXPNO 129  
PROCNO 1

F2 - Acquisition Parameters  
Date\_ 20151122  
Time 2.50  
INSTRUM spect  
PROBHD 5 mm PABBO BB/  
PULPROG zg30  
TD 32768  
SOLVENT CDCl3  
NS 32  
DS 0  
SWH 7211.539 Hz  
FIDRES 0.220079 Hz  
AQ 2.2719147 sec  
RG 177.16  
DW 69.333 usec  
DE 10.50 usec  
TE 298.4 K  
D1 2.00000000 sec  
TD0 1

===== CHANNEL f1 =====  
SFO1 400.1324008 MHz  
NUC1 1H  
P1 12.90 usec  
PLW1 15.00000000 W

F2 - Processing parameters  
SI 16384  
SF 400.1300129 MHz  
WDW EM  
SSB 0  
LB 0 Hz  
GB 0  
PC 1.00

N-benzyl-2-(6-methyl-2-phenyl-1H-indol-1-yl)benzamide (8q)

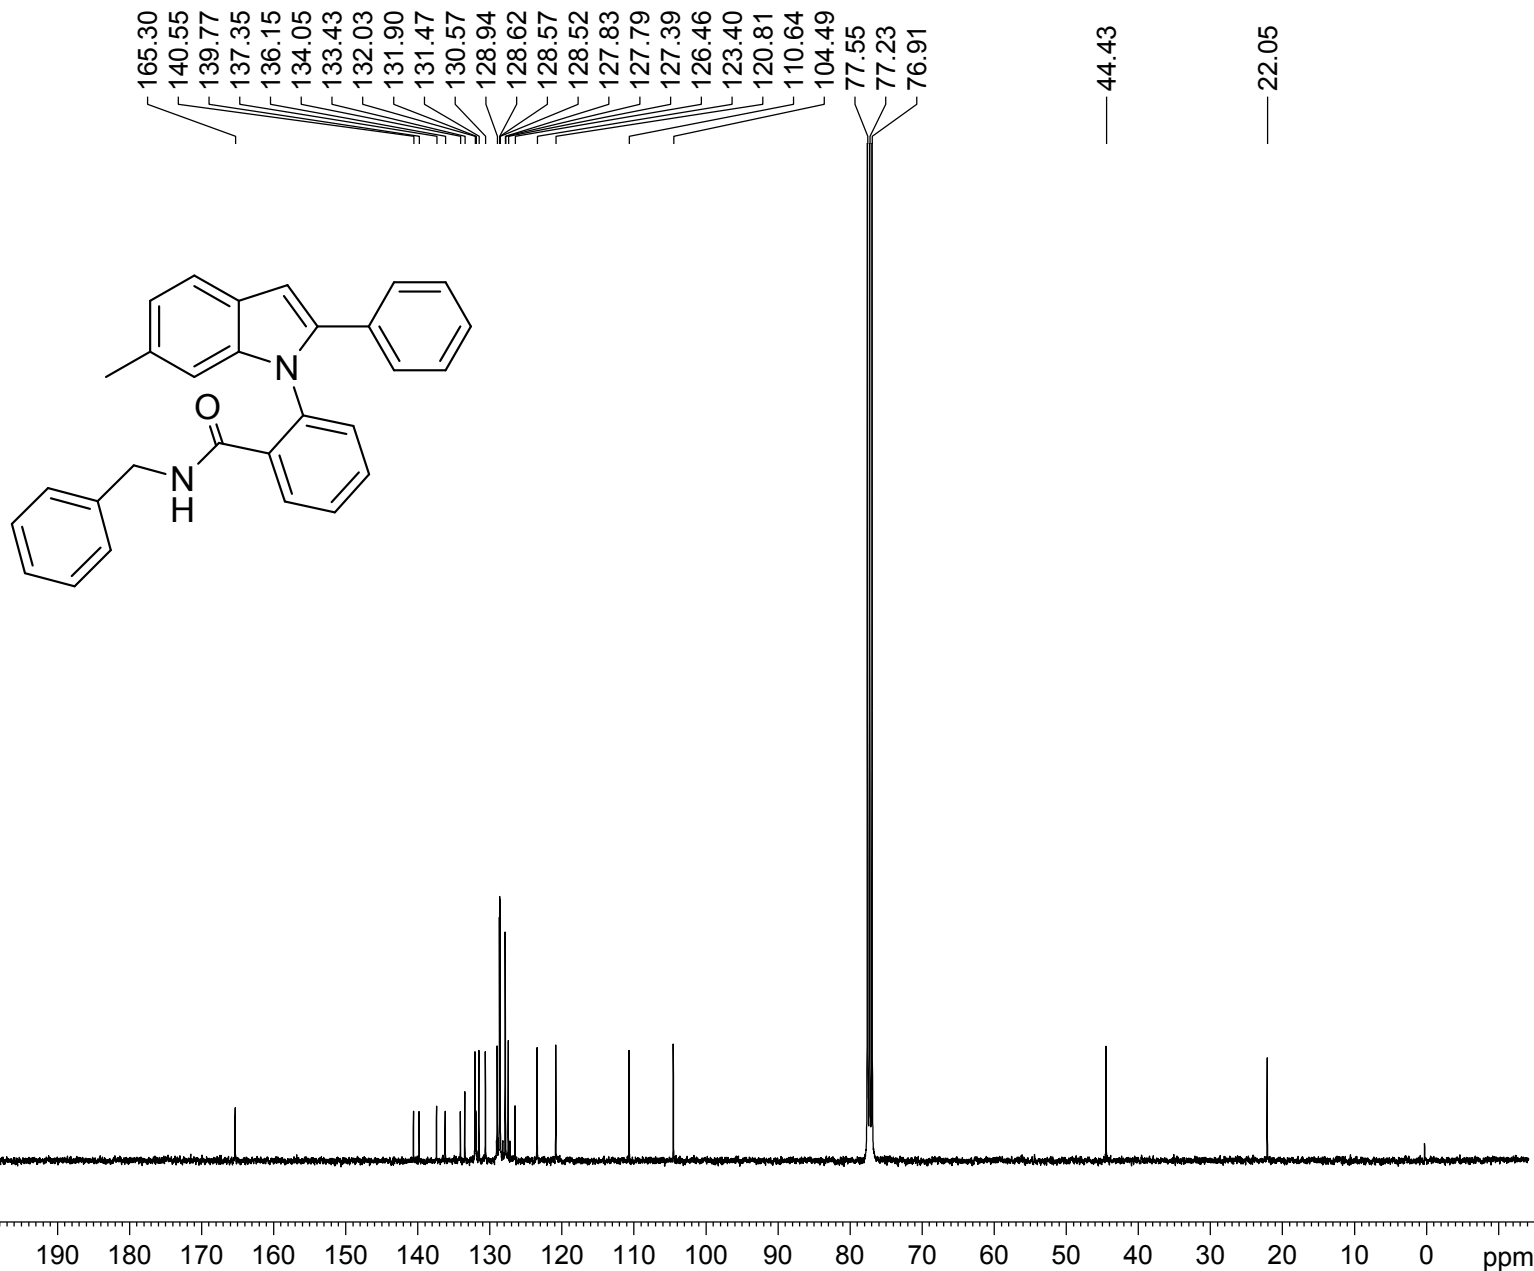

Current Data Parameters

NAME project 1  
 EXPNO 130  
 PROCNO 1

F2 - Acquisition Parameters

Date\_ 20151122  
 Time 2.56  
 INSTRUM spect  
 PROBHD 5 mm PABBO BB/  
 PULPROG zgpg30  
 TD 32768  
 SOLVENT CDCl3  
 NS 2185  
 DS 0  
 SWH 24038.461 Hz  
 FIDRES 0.733596 Hz  
 AQ 0.6815744 sec  
 RG 198.09  
 DW 20.800 usec  
 DE 6.50 usec  
 TE 299.2 K  
 D1 2.00000000 sec  
 D11 0.03000000 sec  
 TD0 1

==== CHANNEL f1 =====

SFO1 100.6233319 MHz  
 NUC1 13C  
 P1 10.00 usec  
 PLW1 47.50000000 W

==== CHANNEL f2 =====

SFO2 400.1316005 MHz  
 NUC2 1H  
 CPDPRG[2] waltz16  
 PCPD2 90.00 usec  
 PLW2 15.00000000 W  
 PLW12 0.33750001 W  
 PLW13 0.27338001 W

F2 - Processing parameters

SI 32768  
 SF 100.6127479 MHz  
 WDW EM  
 SSB 0  
 LB 2.00 Hz  
 GB 0  
 PC 1.00

N-benzyl-2-(6-nitro-2-phenyl-1H-indol-1-yl)benzamide (8r)

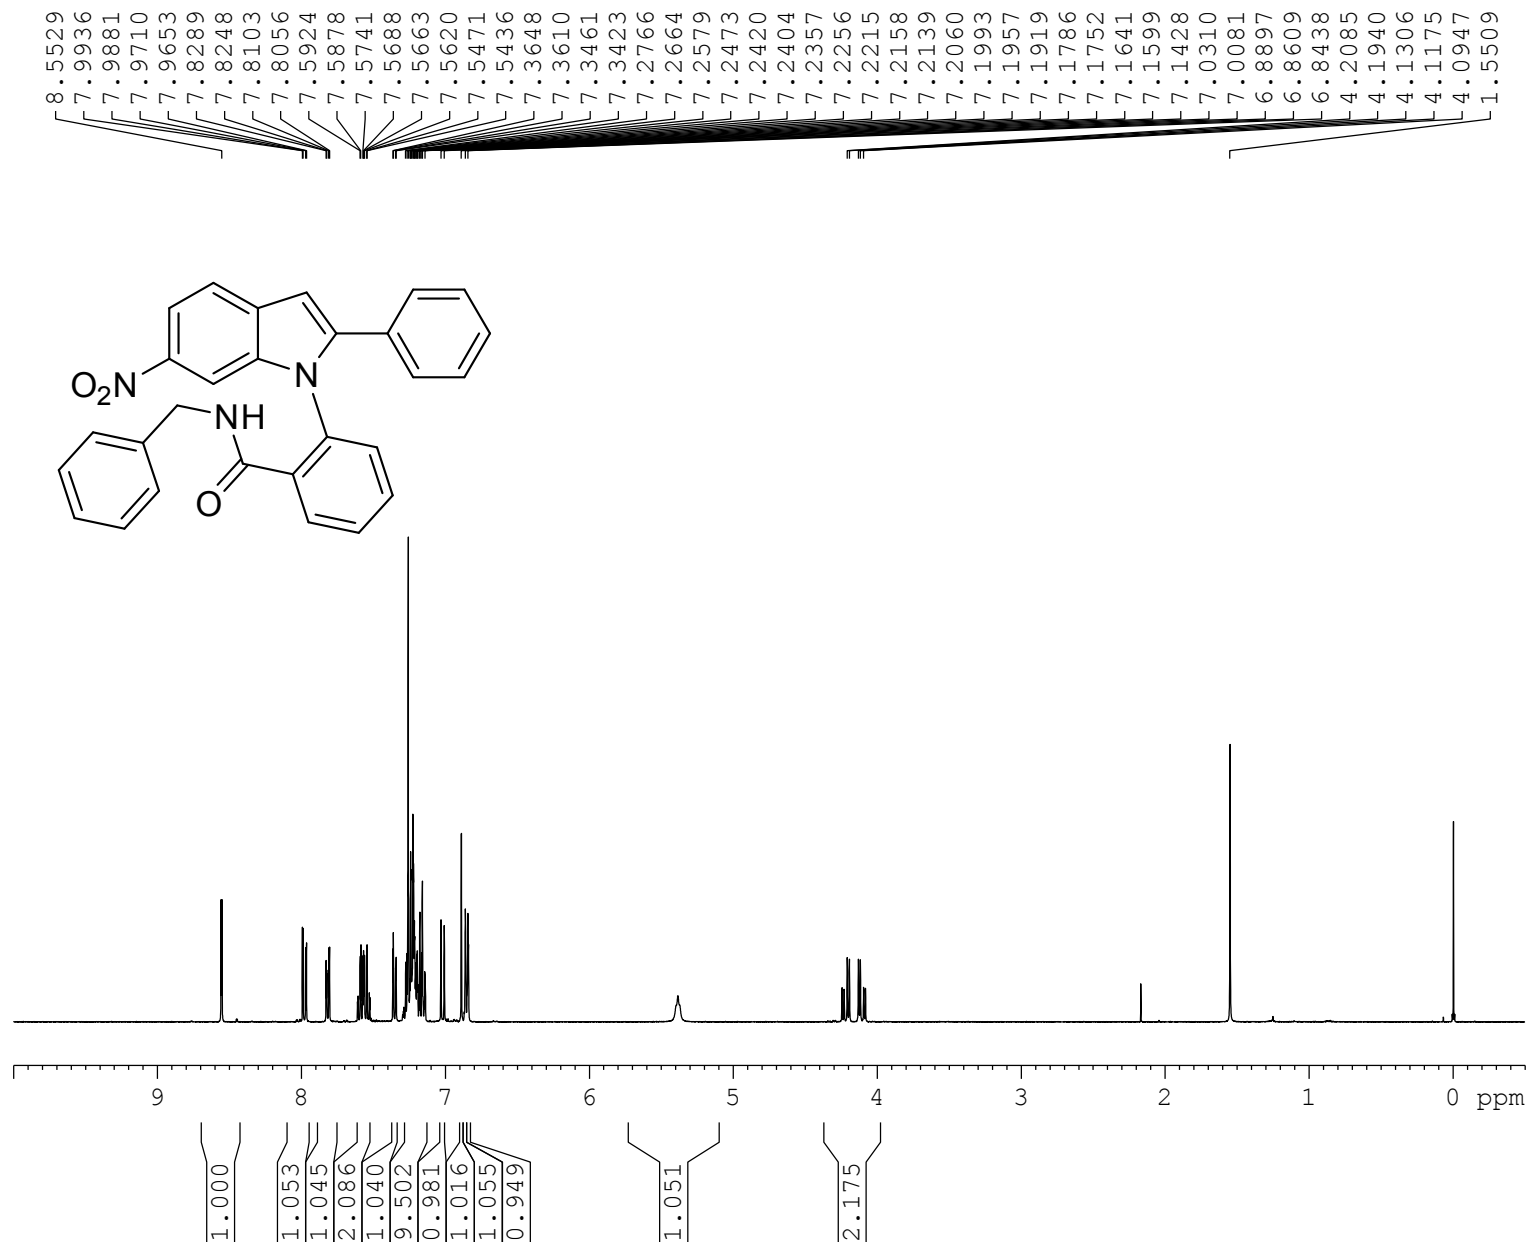

Current Data Parameters  
NAME project 1  
EXPNO 125  
PROCNO 1

F2 - Acquisition Parameters  
Date\_ 20151122  
Time 0.42  
INSTRUM spect  
PROBHD 5 mm PABBO BB/  
PULPROG zg30  
TD 32768  
SOLVENT CDCl3  
NS 32  
DS 0  
SWH 7211.539 Hz  
FIDRES 0.220079 Hz  
AQ 2.2719147 sec  
RG 198.09  
DW 69.333 usec  
DE 10.50 usec  
TE 298.2 K  
D1 2.00000000 sec  
TD0 1

===== CHANNEL f1 =====  
SFO1 400.1324008 MHz  
NUC1 1H  
P1 12.90 usec  
PLW1 15.00000000 W

F2 - Processing parameters  
SI 16384  
SF 400.1300107 MHz  
WDW EM  
SSB 0  
LB 0 Hz  
GB 0  
PC 1.00

N-benzyl-2-(6-nitro-2-phenyl-1H-indol-1-yl)benzamide (8r)

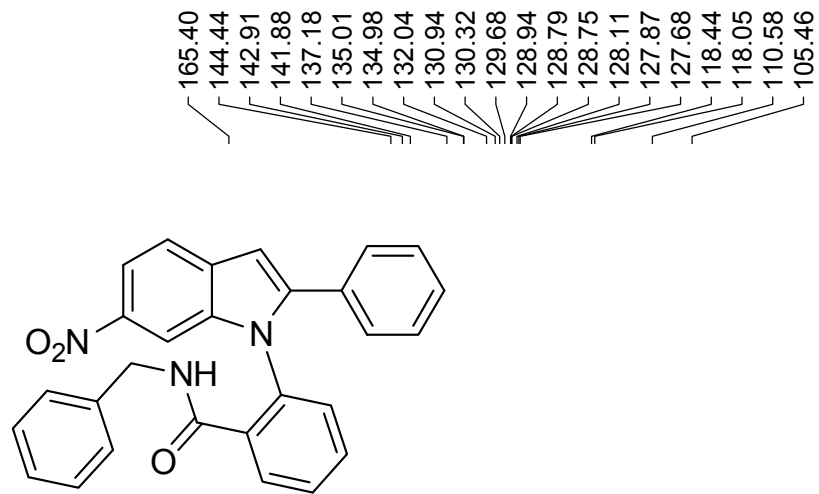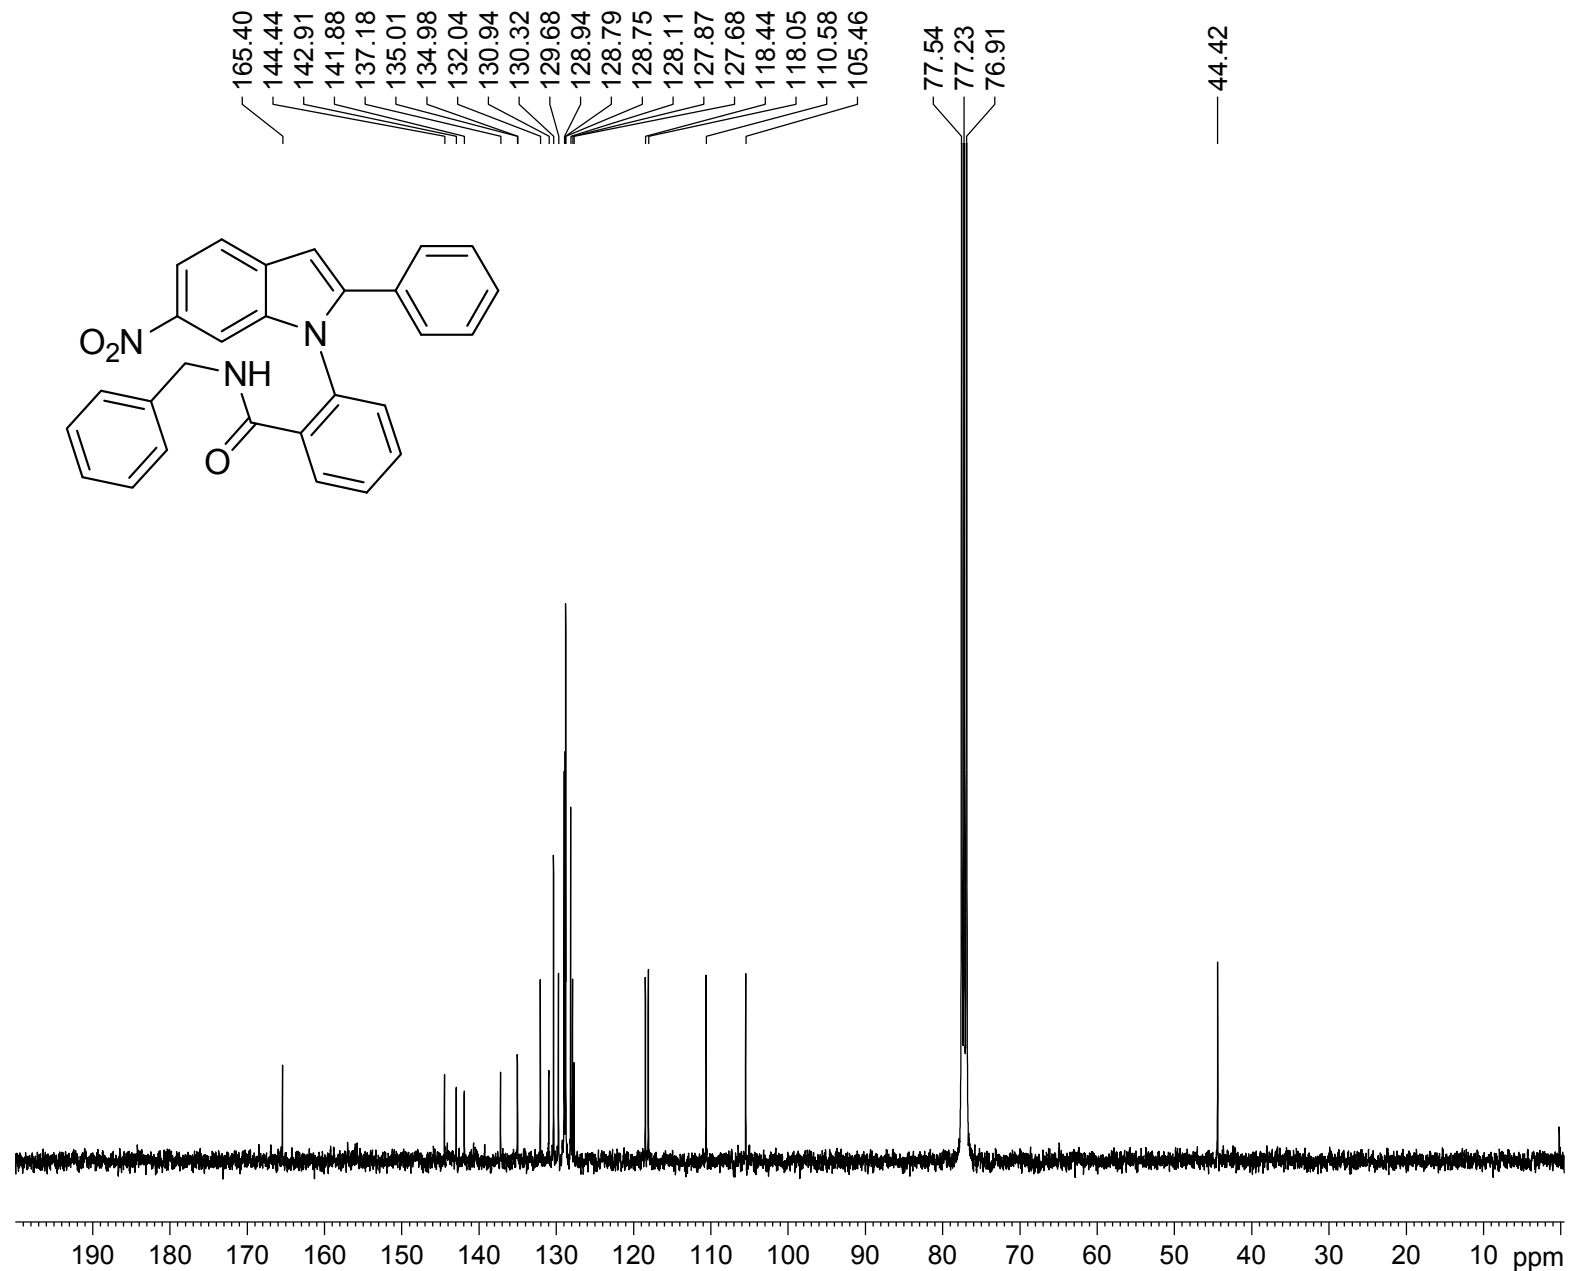

Current Data Parameters

NAME project 1  
 EXPNO 126  
 PROCNO 1

F2 - Acquisition Parameters

Date\_ 20151122  
 Time 0.45  
 INSTRUM spect  
 PROBHD 5 mm PABBO BB/  
 PULPROG zgpg30  
 TD 32768  
 SOLVENT CDCl3  
 NS 2319  
 DS 0  
 SWH 24038.461 Hz  
 FIDRES 0.733596 Hz  
 AQ 0.6815744 sec  
 RG 198.09  
 DW 20.800 usec  
 DE 6.50 usec  
 TE 298.1 K  
 D1 2.00000000 sec  
 D11 0.03000000 sec  
 TD0 1

==== CHANNEL f1 =====

SFO1 100.6233319 MHz  
 NUC1 13C  
 P1 10.00 usec  
 PLW1 47.50000000 W

==== CHANNEL f2 =====

SFO2 400.1316005 MHz  
 NUC2 1H  
 CPDPRG[2] waltz16  
 PCPD2 90.00 usec  
 PLW2 15.00000000 W  
 PLW12 0.33750001 W  
 PLW13 0.27338001 W

F2 - Processing parameters

SI 32768  
 SF 100.6127472 MHz  
 WDW EM  
 SSB 0  
 LB 2.00 Hz  
 GB 0  
 PC 1.00



N-benzyl-2-(5-chloro-2-phenyl-1H-indol-1-yl)benzamide (8s)

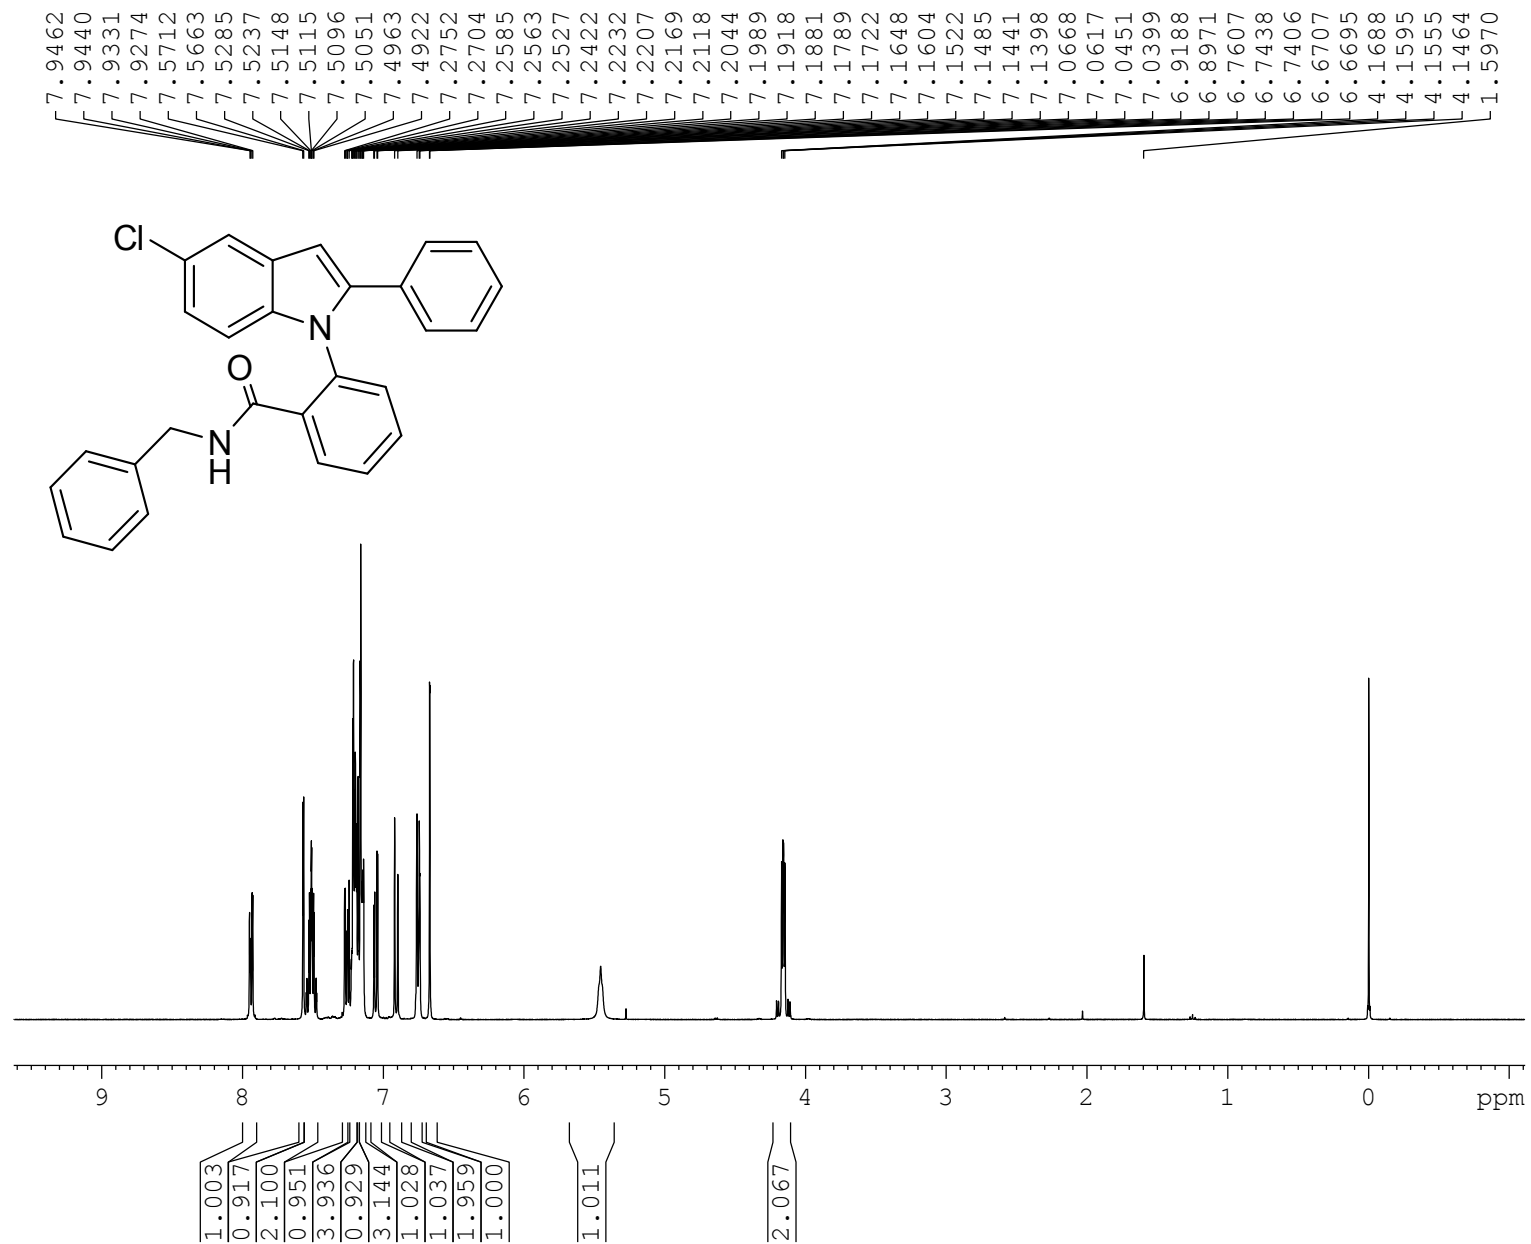

Current Data Parameters  
 NAME project 1  
 EXPNO 109  
 PROCNO 1

F2 - Acquisition Parameters  
 Date\_ 20151008  
 Time 21.28  
 INSTRUM spect  
 PROBHD 5 mm PABBO BB/  
 PULPROG zg30  
 TD 32768  
 SOLVENT CDCl3  
 NS 32  
 DS 0  
 SWH 7211.539 Hz  
 FIDRES 0.220079 Hz  
 AQ 2.2719147 sec  
 RG 71.42  
 DW 69.333 usec  
 DE 10.50 usec  
 TE 297.9 K  
 D1 2.00000000 sec  
 TD0 1

===== CHANNEL f1 =====  
 SFO1 400.1324008 MHz  
 NUC1 1H  
 P1 12.90 usec  
 PLW1 15.00000000 W

F2 - Processing parameters  
 SI 16384  
 SF 400.1300169 MHz  
 WDW EM  
 SSB 0  
 LB 0 Hz  
 GB 0  
 PC 1.00

N-benzyl-2-(5-chloro-2-phenyl-1H-indol-1-yl)benzamide (8s)

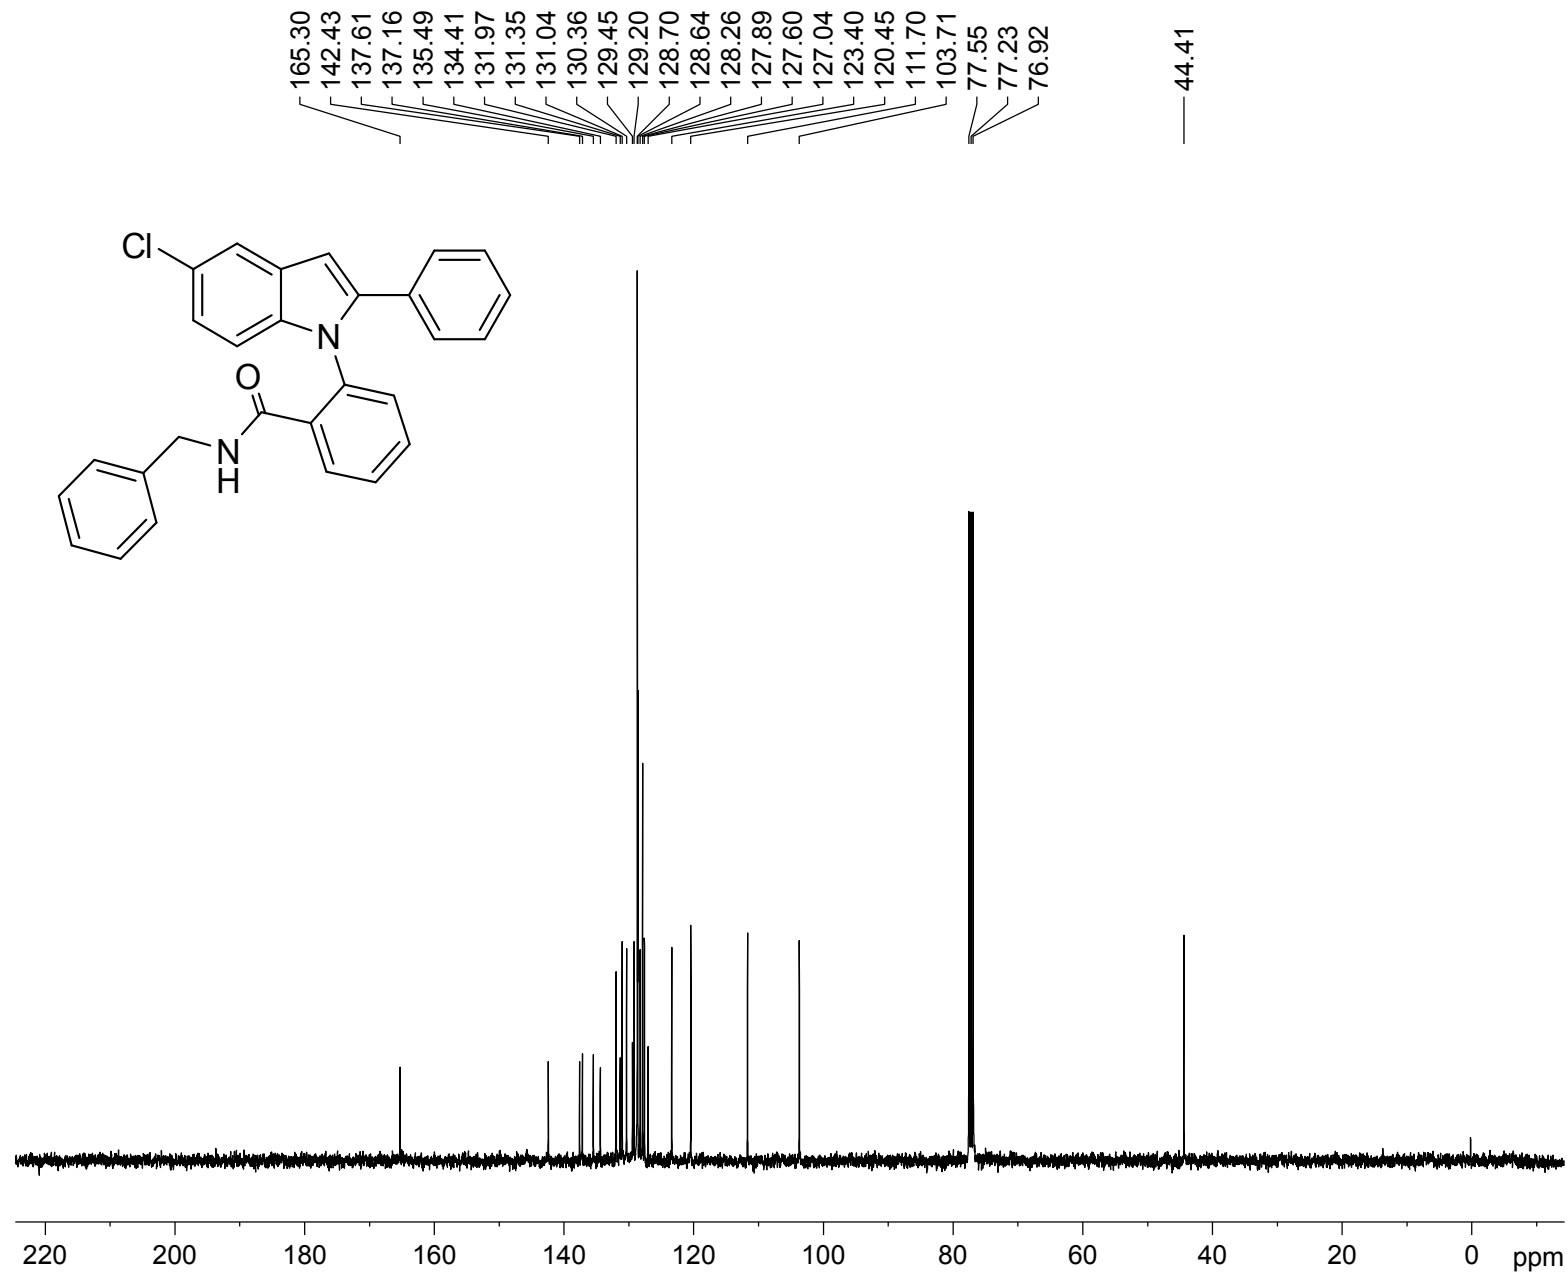

Current Data Parameters

NAME project 1  
 EXPNO 138  
 PROCNO 1

F2 - Acquisition Parameters

Date\_ 20151122  
 Time 6.27  
 INSTRUM spect  
 PROBHD 5 mm PABBO BB/  
 PULPROG zgpg30  
 TD 32768  
 SOLVENT CDCl3  
 NS 113  
 DS 0  
 SWH 24038.461 Hz  
 FIDRES 0.733596 Hz  
 AQ 0.6815744 sec  
 RG 198.09  
 DW 20.800 usec  
 DE 6.50 usec  
 TE 297.6 K  
 D1 2.00000000 sec  
 D11 0.03000000 sec  
 TD0 1

==== CHANNEL f1 =====

SFO1 100.6233319 MHz  
 NUC1 13C  
 P1 10.00 usec  
 PLW1 47.50000000 W

==== CHANNEL f2 =====

SFO2 400.1316005 MHz  
 NUC2 1H  
 CPDPRG[2] waltz16  
 PCPD2 90.00 usec  
 PLW2 15.00000000 W  
 PLW12 0.33750001 W  
 PLW13 0.27338001 W

F2 - Processing parameters

SI 32768  
 SF 100.6127530 MHz  
 WDW EM  
 SSB 0  
 LB 2.00 Hz  
 GB 0  
 PC 1.00

2-(5-chloro-2-phenyl-1H-indol-1-yl)-N-phenylbenzamide (8t)

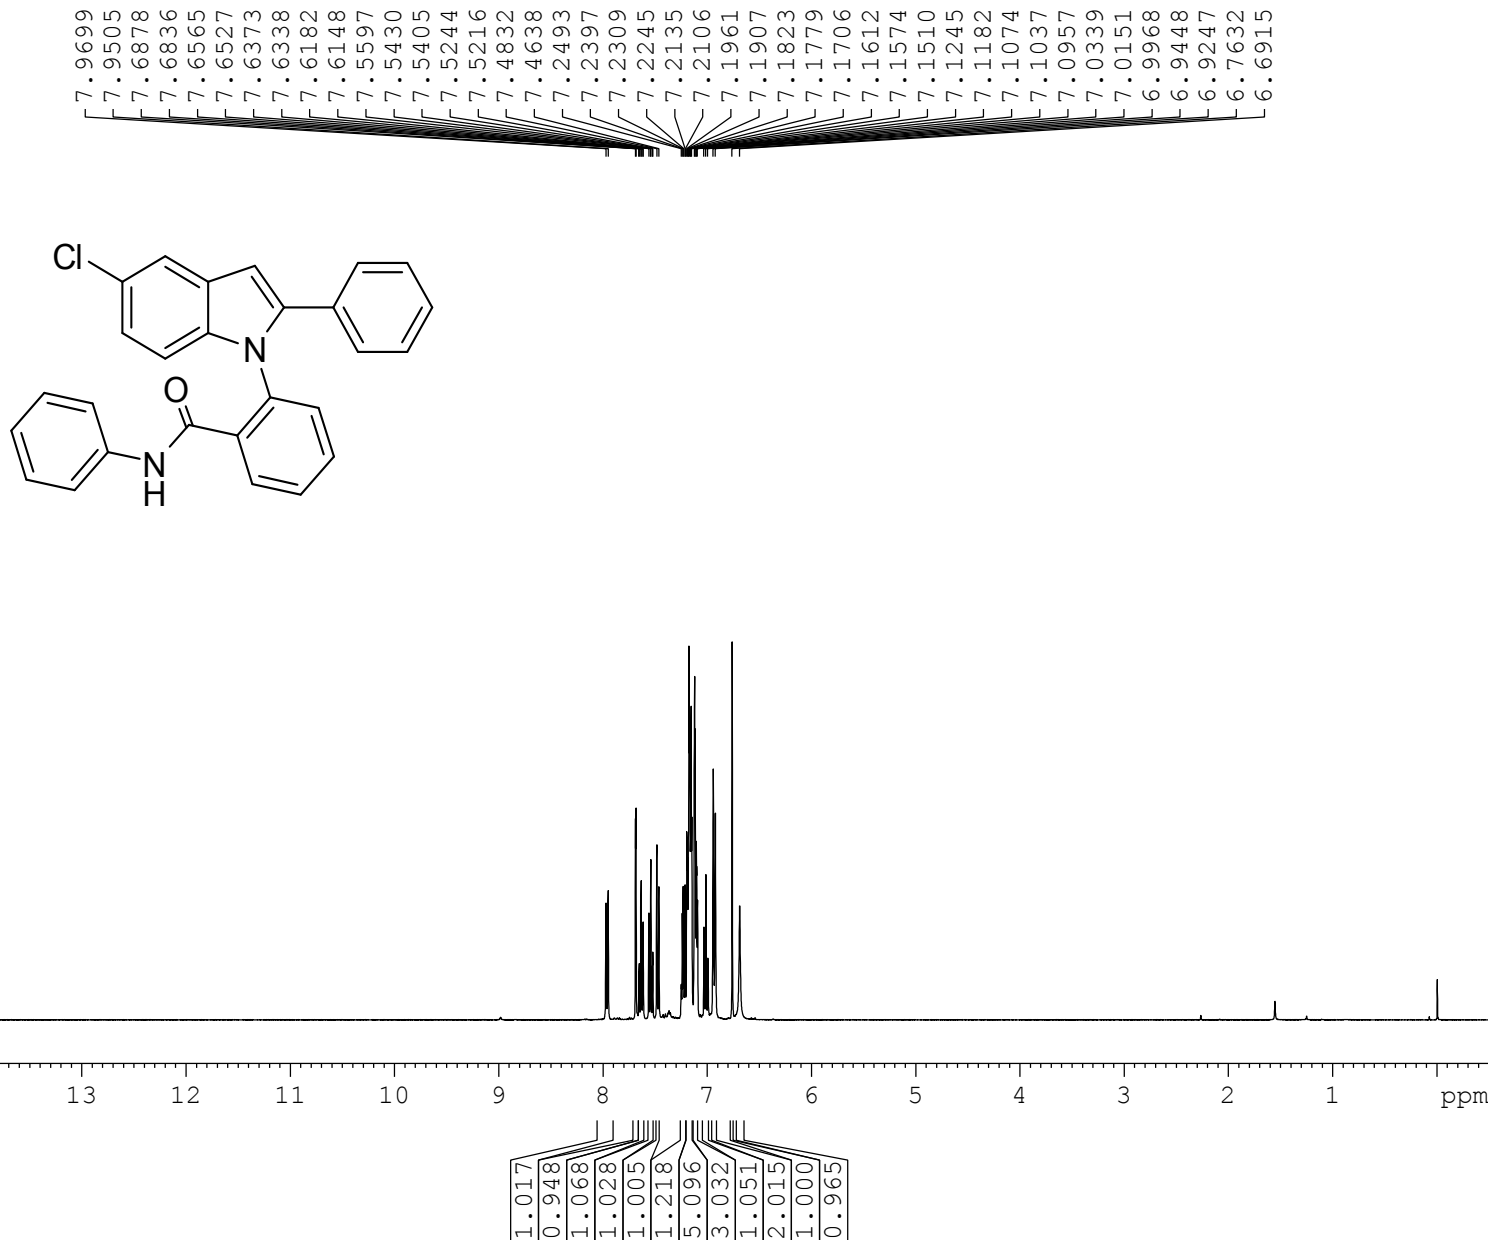

Current Data Parameters  
 NAME project 1  
 EXPNO 198  
 PROCNO 1

F2 - Acquisition Parameters  
 Date\_ 20160215  
 Time 14.40  
 INSTRUM spect  
 PROBHD 5 mm PABBO BB/  
 PULPROG zg30  
 TD 32768  
 SOLVENT CDCl3  
 NS 32  
 DS 0  
 SWH 7211.539 Hz  
 FIDRES 0.220079 Hz  
 AQ 2.2719147 sec  
 RG 78.51  
 DW 69.333 usec  
 DE 10.50 usec  
 TE 297.1 K  
 D1 2.0000000 sec  
 TD0 1

===== CHANNEL f1 =====  
 SFO1 400.1324008 MHz  
 NUC1 1H  
 P1 12.90 usec  
 PLW1 15.00000000 W

F2 - Processing parameters  
 SI 16384  
 SF 400.1300182 MHz  
 WDW EM  
 SSB 0  
 LB 0 Hz  
 GB 0  
 PC 1.00

2-(5-chloro-2-phenyl-1H-indol-1-yl)-N-phenylbenzamide (8t)

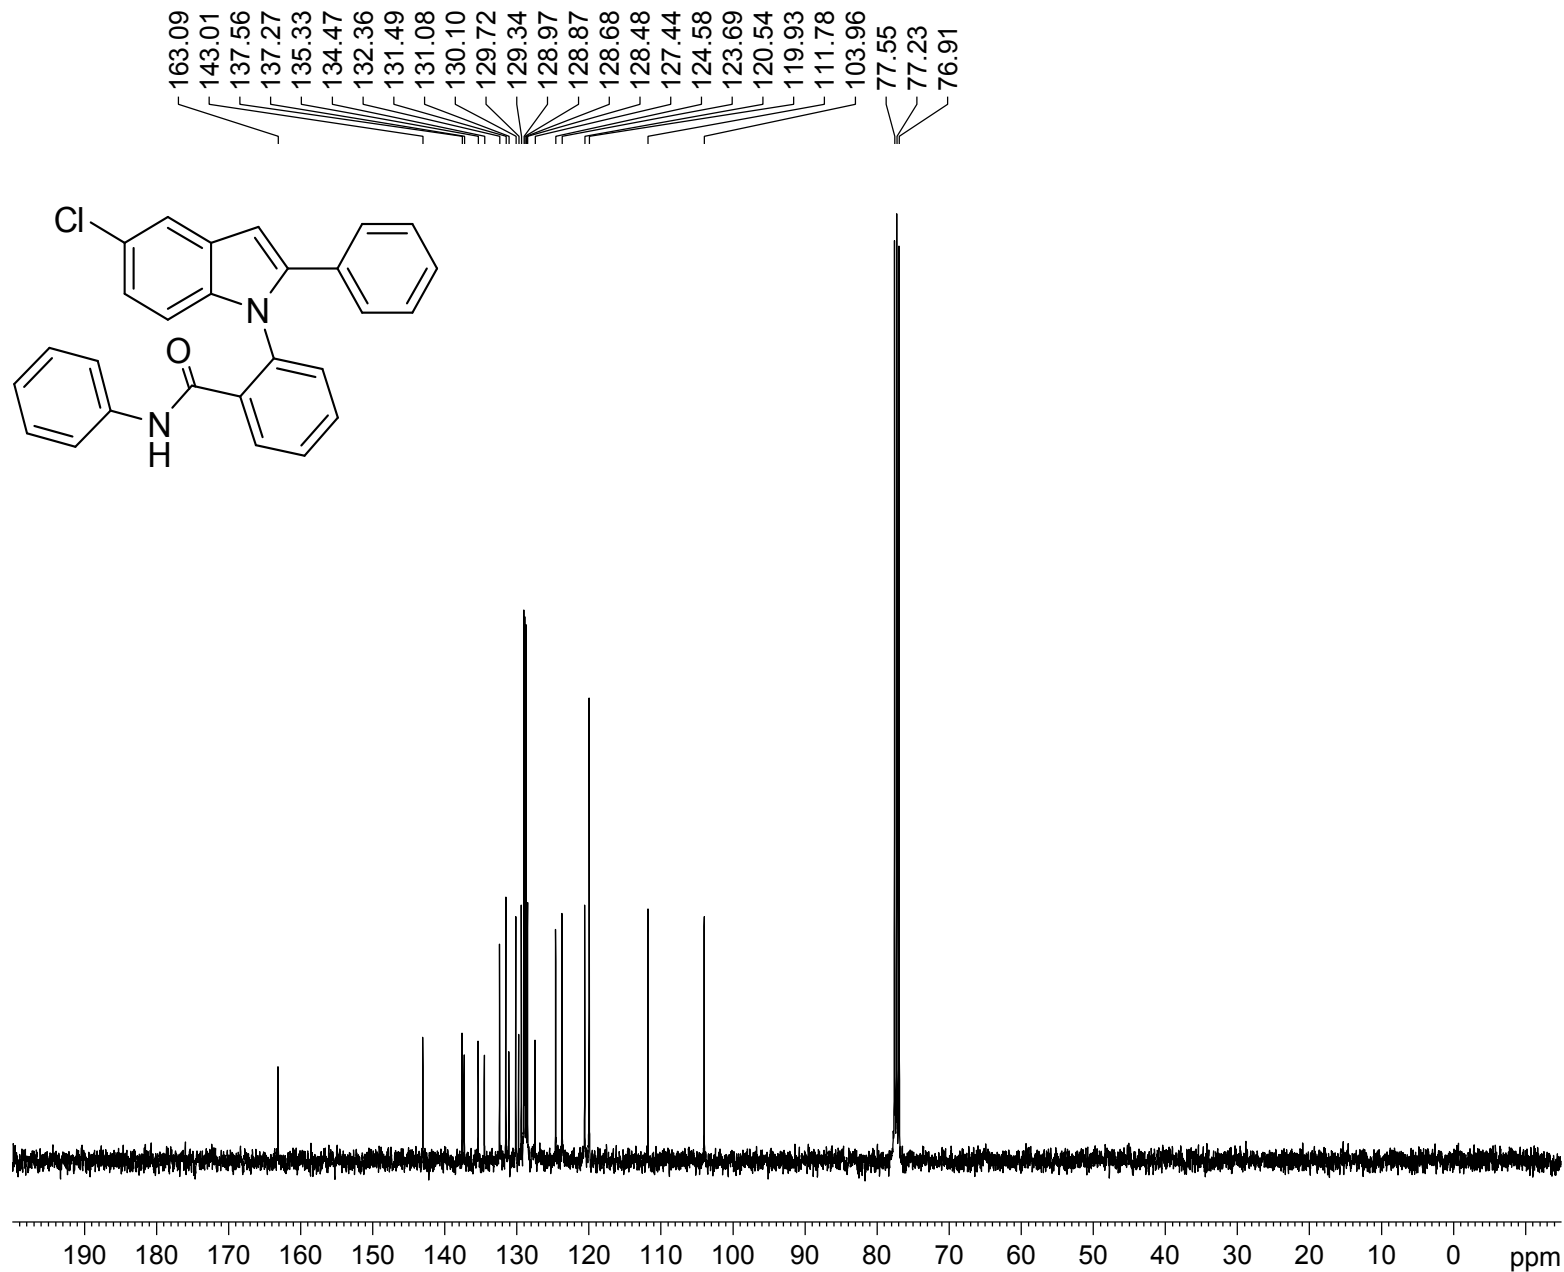

Current Data Parameters

NAME project 1  
 EXPNO 199  
 PROCNO 1

F2 - Acquisition Parameters

Date\_ 20160215  
 Time 14.45  
 INSTRUM spect  
 PROBHD 5 mm PABBO BB/  
 PULPROG zgpg30  
 TD 32768  
 SOLVENT CDCl3  
 NS 87  
 DS 0  
 SWH 24038.461 Hz  
 FIDRES 0.733596 Hz  
 AQ 0.6815744 sec  
 RG 198.09  
 DW 20.800 usec  
 DE 6.50 usec  
 TE 297.9 K  
 D1 2.00000000 sec  
 D11 0.03000000 sec  
 TD0 1

==== CHANNEL f1 =====

SFO1 100.6228298 MHz  
 NUC1 13C  
 P1 10.00 usec  
 PLW1 47.50000000 W

==== CHANNEL f2 =====

SFO2 400.1316005 MHz  
 NUC2 1H  
 CPDPRG[2] waltz16  
 PCPD2 90.00 usec  
 PLW2 15.00000000 W  
 PLW12 0.33750001 W  
 PLW13 0.27338001 W

F2 - Processing parameters

SI 32768  
 SF 100.6127514 MHz  
 WDW EM  
 SSB 0  
 LB 2.00 Hz  
 GB 0  
 PC 1.00

2-(5-chloro-2-heptyl-1H-indol-1-yl)-N-(3-methoxypropyl)benzamide (8u)

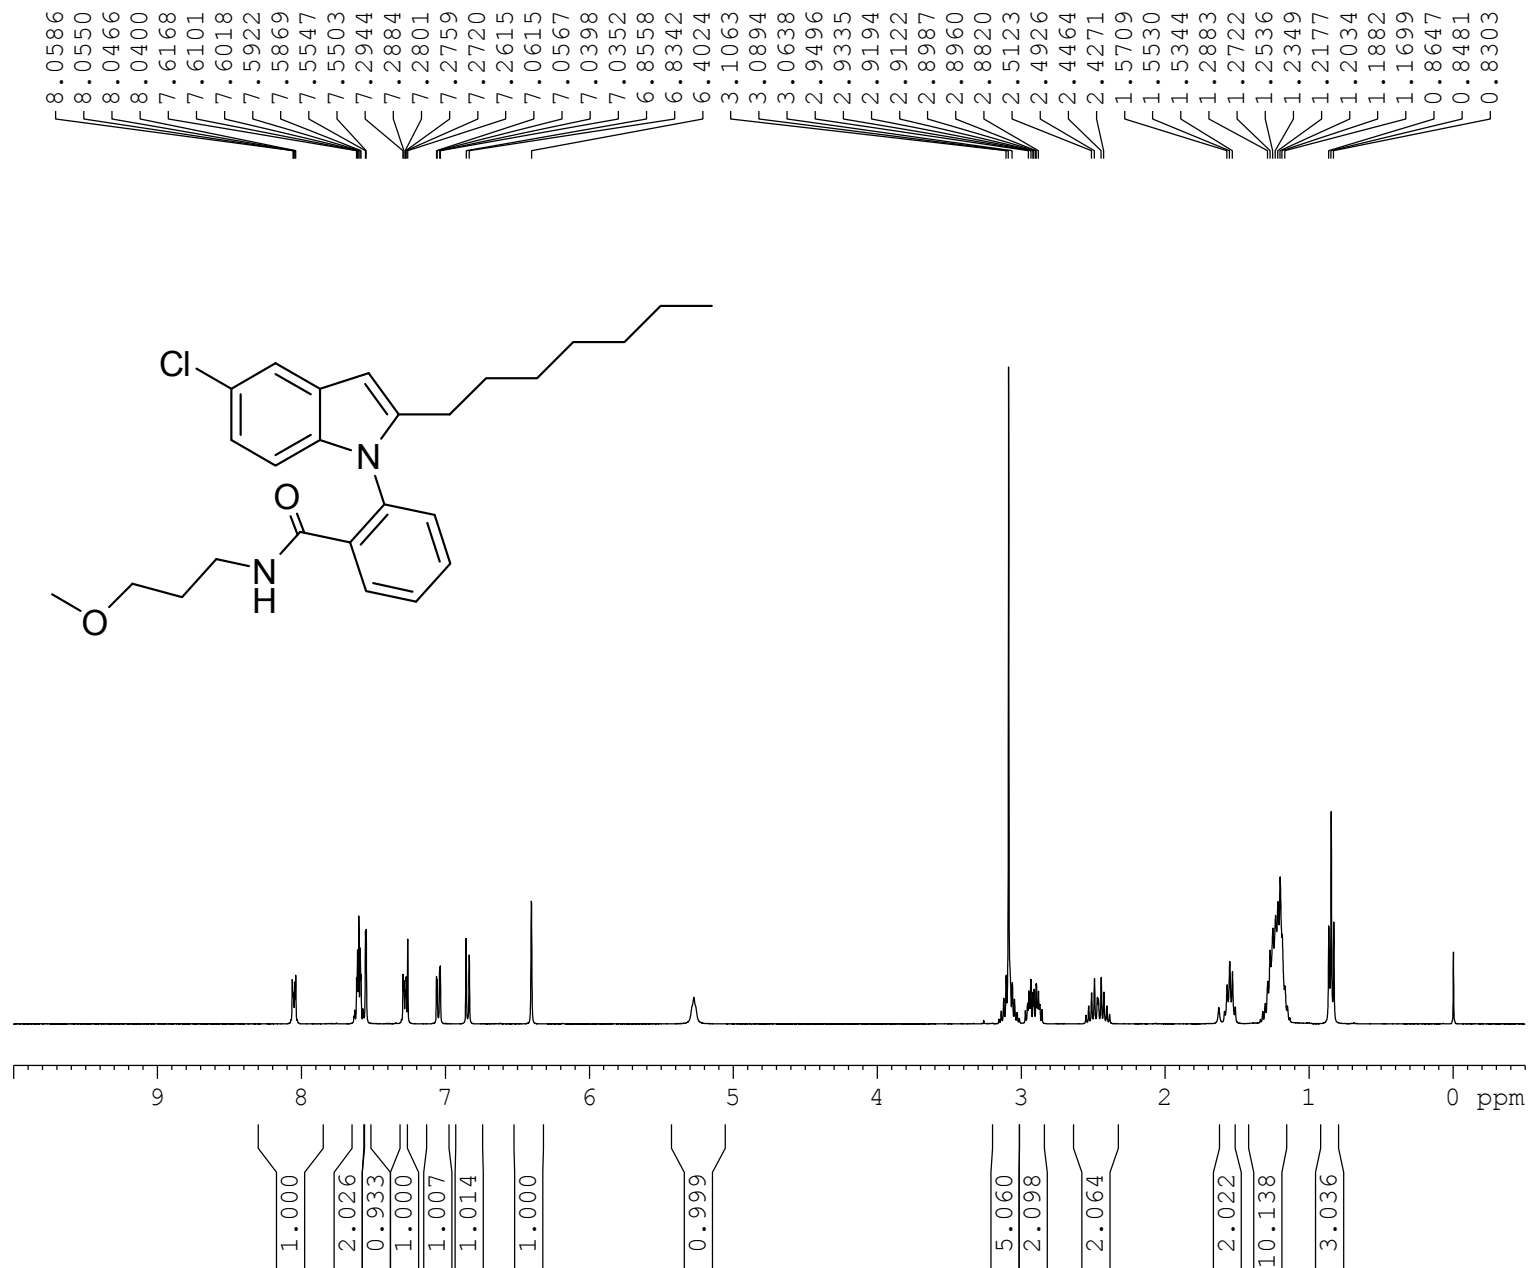

Current Data Parameters  
 NAME project 1  
 EXPNO 196  
 PROCNO 1

F2 - Acquisition Parameters  
 Date\_ 20160215  
 Time 14.13  
 INSTRUM spect  
 PROBHD 5 mm PABBO BB/  
 PULPROG zg30  
 TD 32768  
 SOLVENT CDCl3  
 NS 32  
 DS 0  
 SWH 7211.539 Hz  
 FIDRES 0.220079 Hz  
 AQ 2.2719147 sec  
 RG 89.08  
 DW 69.333 usec  
 DE 10.50 usec  
 TE 297.3 K  
 D1 2.00000000 sec  
 D10 1

===== CHANNEL f1 =====  
 SFO1 400.1324008 MHz  
 NUC1 1H  
 P1 12.90 usec  
 PLW1 15.00000000 W

F2 - Processing parameters  
 SI 16384  
 SF 400.1300094 MHz  
 WDW EM  
 SSB 0  
 LB 0 Hz  
 GB 0  
 PC 1.00

2-(5-chloro-2-heptyl-1H-indol-1-yl)-N-(3-methoxypropyl)benzamide (8u)

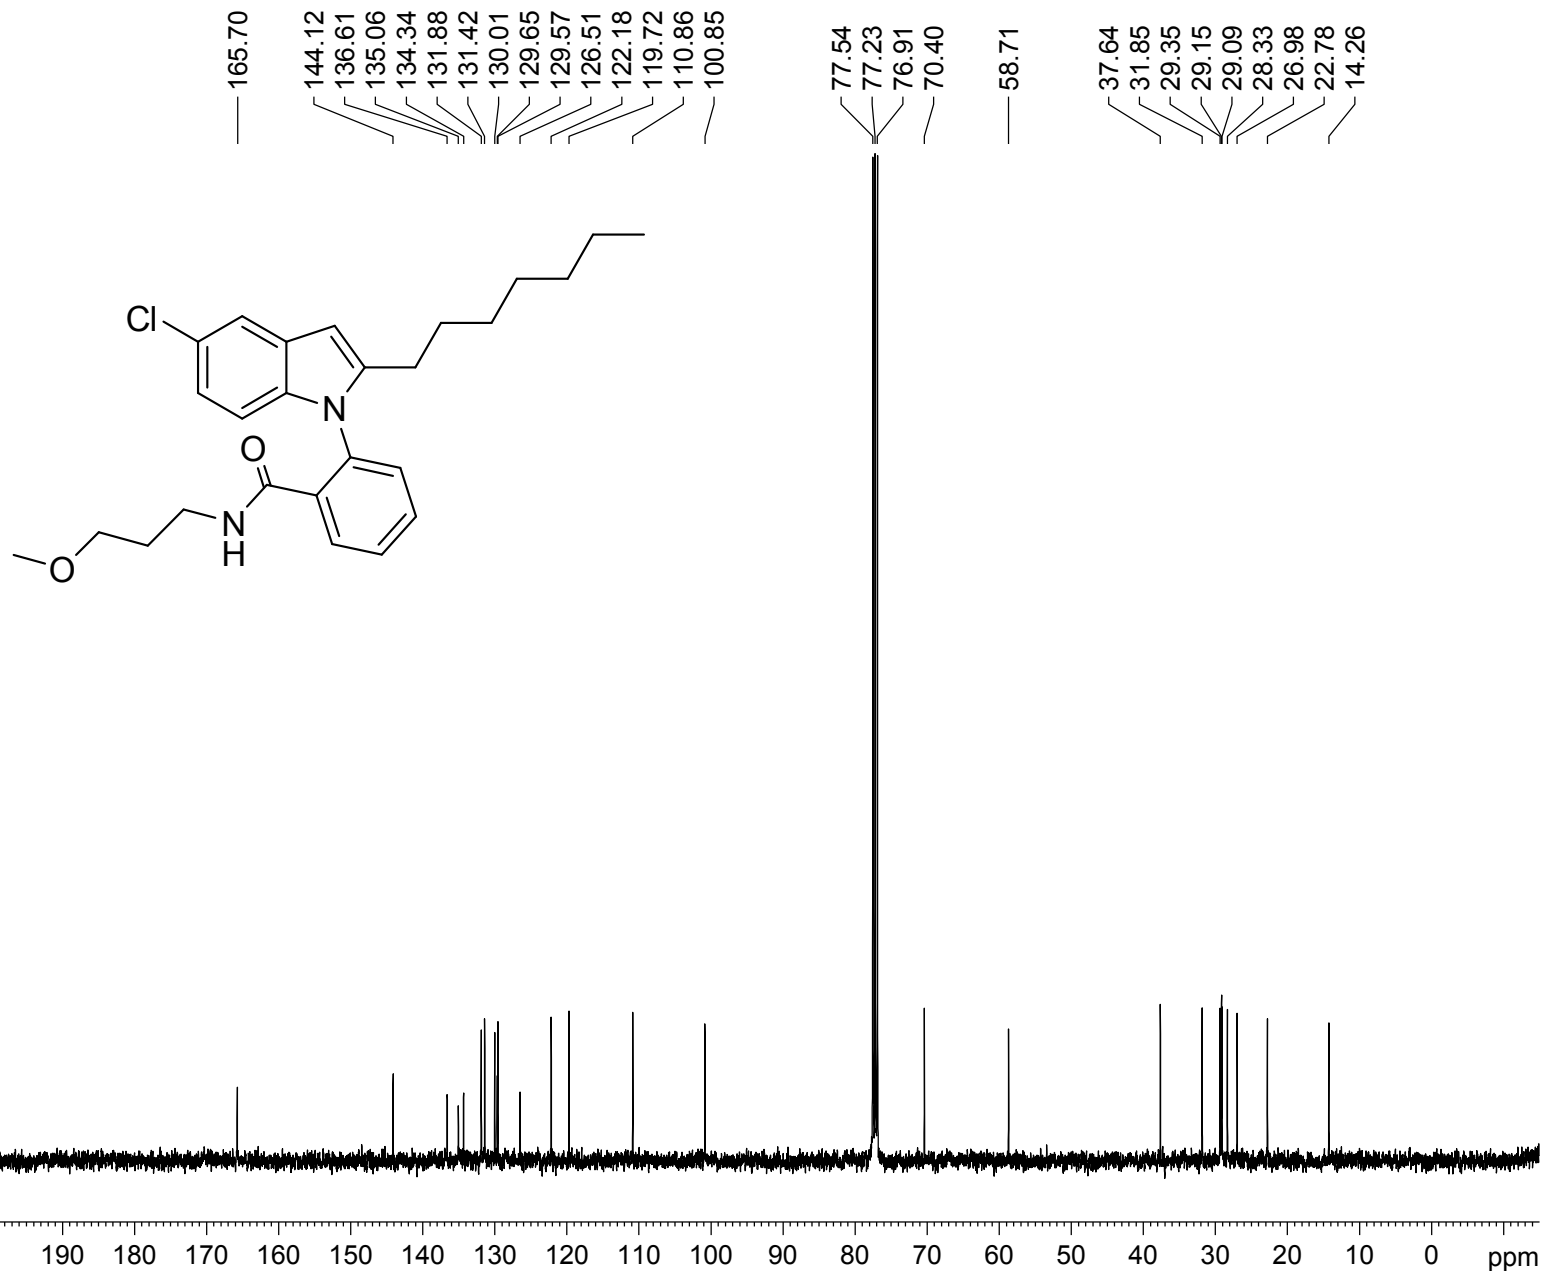

Current Data Parameters

NAME project 1  
EXPNO 197  
PROCNO 1

F2 - Acquisition Parameters

Date\_ 20160215  
Time 14.21  
INSTRUM spect  
PROBHD 5 mm PABBO BB/  
PULPROG zgpg30  
TD 32768  
SOLVENT CDCl3  
NS 174  
DS 0  
SWH 24038.461 Hz  
FIDRES 0.733596 Hz  
AQ 0.6815744 sec  
RG 198.09  
DW 20.800 usec  
DE 6.50 usec  
TE 298.3 K  
D1 2.00000000 sec  
D11 0.03000000 sec  
TD0 1

===== CHANNEL f1 =====

SFO1 100.6228298 MHz  
NUC1 13C  
P1 10.00 usec  
PLW1 47.50000000 W

===== CHANNEL f2 =====

SFO2 400.1316005 MHz  
NUC2 1H  
CPDPRG[2] waltz16  
PCPD2 90.00 usec  
PLW2 15.00000000 W  
PLW12 0.33750001 W  
PLW13 0.27338001 W

F2 - Processing parameters

SI 32768  
SF 100.6127486 MHz  
WDW EM  
SSB 0  
LB 2.00 Hz  
GB 0  
PC 1.00

N-benzyl-2-(2-(2-bromo-4-chlorophenyl)-5-chloro-1H-indol-1-yl)benzamide (8v)

7.8261  
7.8034  
7.6294  
7.6260  
7.5419  
7.5379  
7.4676  
7.4630  
7.4587  
7.4521  
7.4450  
7.4409  
7.4369  
7.3006  
7.2960  
7.2787  
7.2573  
7.2323  
7.2137  
7.1954  
7.1732  
7.1522  
7.1281  
7.1241  
7.1032  
7.0873  
7.0833  
7.0656  
7.0615  
6.9189  
6.8972  
6.8116  
6.7951  
6.6750  
5.6172  
4.3136  
4.2999  
4.2777  
4.2639  
4.2012  
4.1883  
4.1652  
4.1522  
1.6013

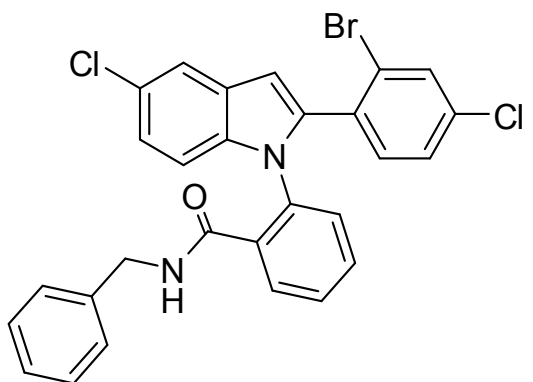

Current Data Parameters  
NAME project 1  
EXPNO 191  
PROCNO 1

F2 - Acquisition Parameters  
Date\_ 20160215  
Time 12.50  
INSTRUM spect  
PROBHD 5 mm PABBO BB/  
PULPROG zg30  
TD 32768  
SOLVENT CDCl3  
NS 32  
DS 0  
SWH 7211.539 Hz  
FIDRES 0.220079 Hz  
AQ 2.2719147 sec  
RG 177.16  
DW 69.333 usec  
DE 10.50 usec  
TE 297.1 K  
D1 2.00000000 sec  
TD0 1

===== CHANNEL f1 =====  
SFO1 400.1324008 MHz  
NUC1 1H  
P1 12.90 usec  
PLW1 15.00000000 W

F2 - Processing parameters  
SI 16384  
SF 400.1300112 MHz  
WDW EM  
SSB 0  
LB 0 Hz  
GB 0  
PC 1.00

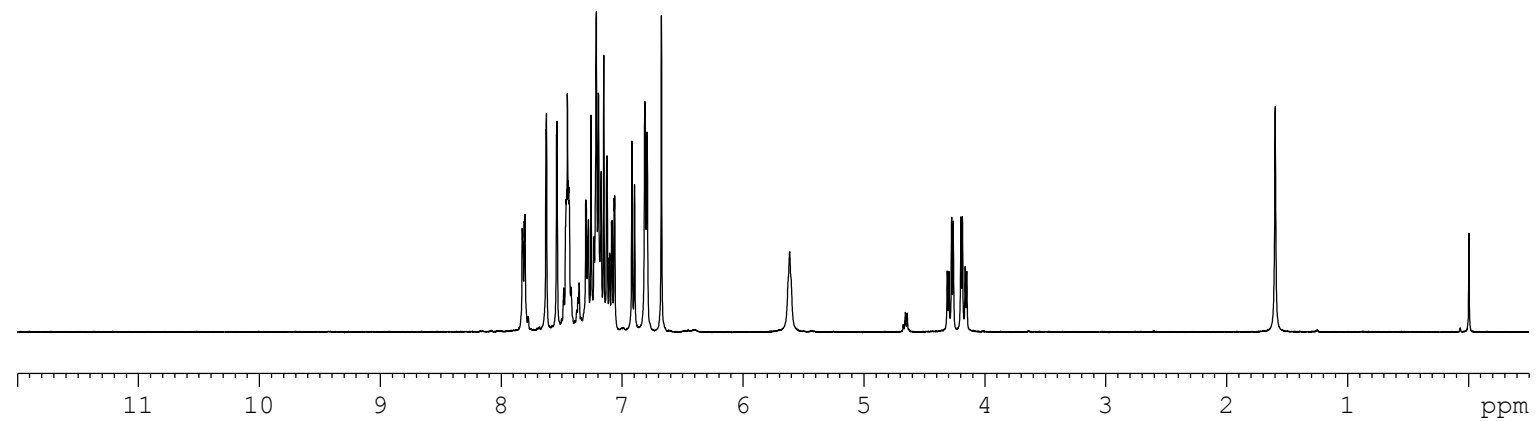

1.041  
1.027  
1.002  
2.042  
1.066  
5.057  
1.088  
1.067  
2.015  
1.000  
1.054  
2.141

N-benzyl-2-(2-(2-bromo-4-chlorophenyl)-5-chloro-1H-indol-1-yl)benzamide (8v)

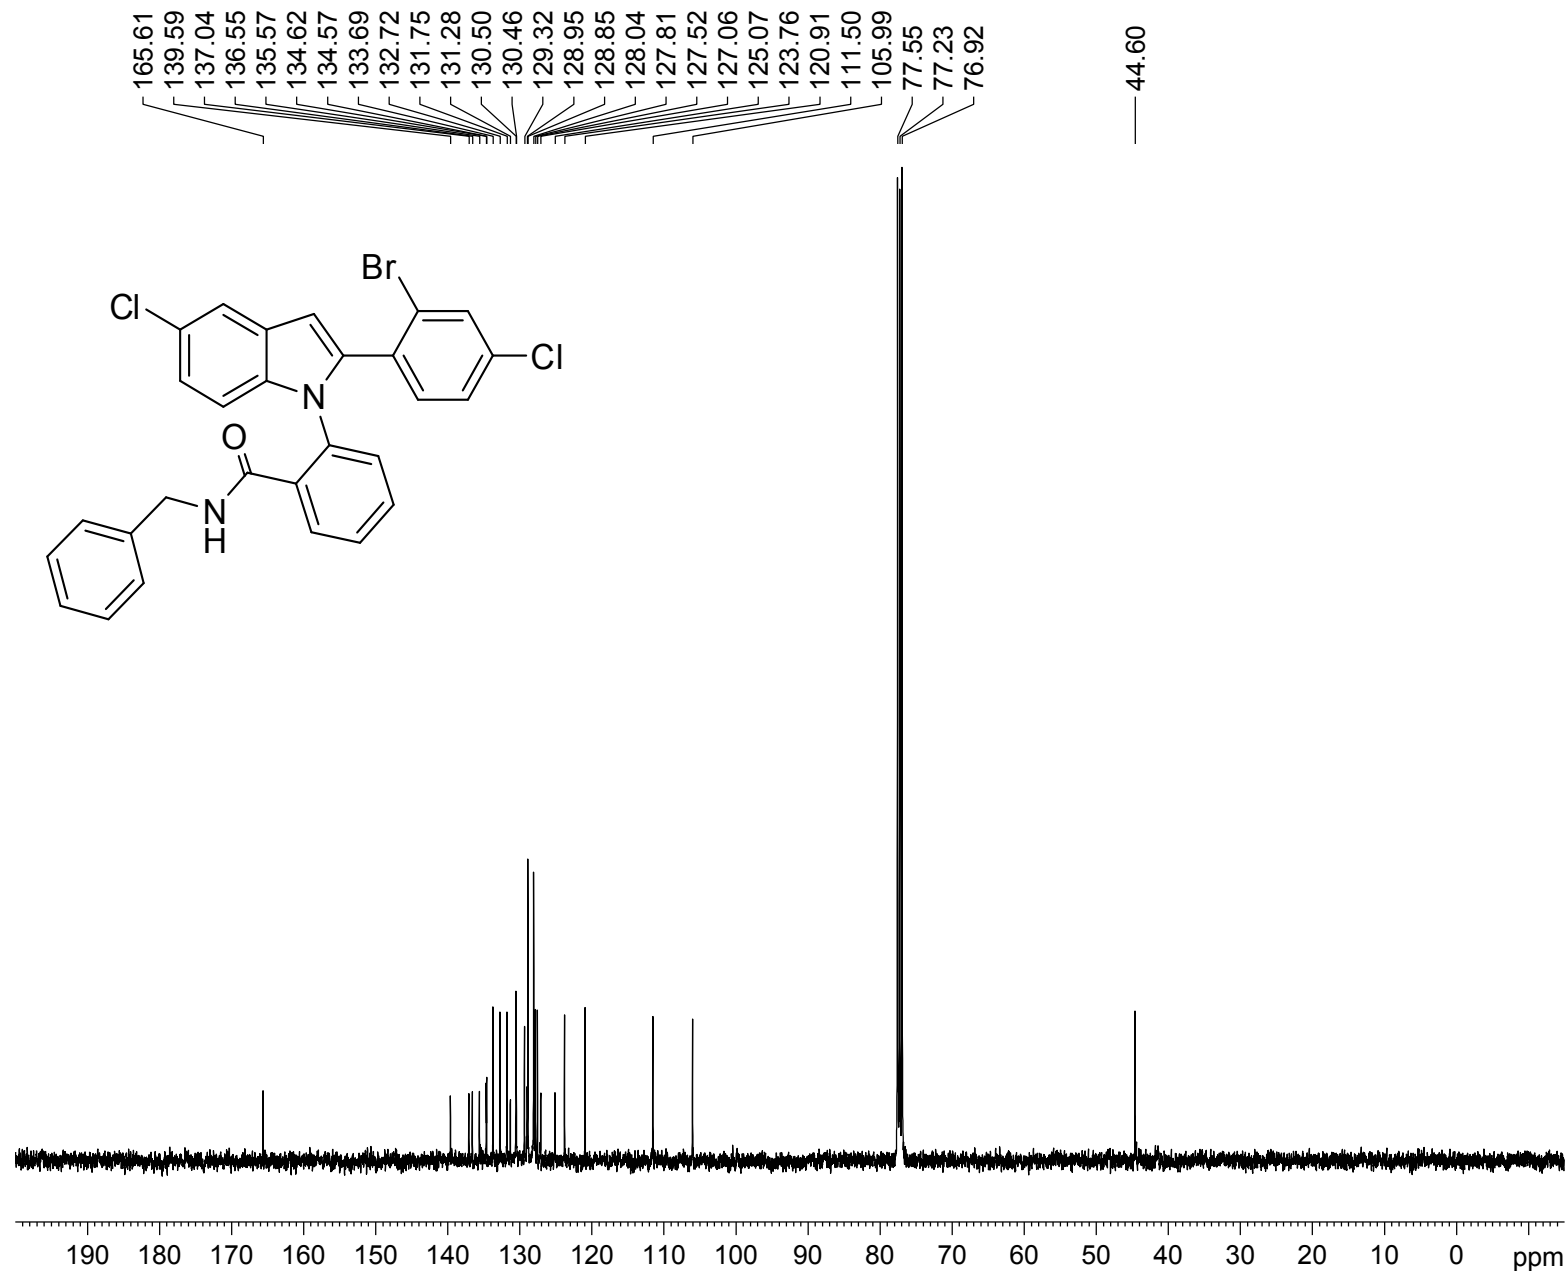

Current Data Parameters

NAME project 1  
EXPNO 192  
PROCNO 1

F2 - Acquisition Parameters

Date\_ 20160215  
Time 12.53  
INSTRUM spect  
PROBHD 5 mm PABBO BB/  
PULPROG zgpg30  
TD 32768  
SOLVENT CDCl3  
NS 508  
DS 0  
SWH 24038.461 Hz  
FIDRES 0.733596 Hz  
AQ 0.6815744 sec  
RG 198.09  
DW 20.800 usec  
DE 6.50 usec  
TE 297.6 K  
D1 2.0000000 sec  
D11 0.03000000 sec  
TD0 1

===== CHANNEL f1 =====

SFO1 100.6228298 MHz  
NUC1 13C  
P1 10.00 usec  
PLW1 47.50000000 W

===== CHANNEL f2 =====

SFO2 400.1316005 MHz  
NUC2 1H  
CPDPRG[2] waltz16  
PCPD2 90.00 usec  
PLW2 15.00000000 W  
PLW12 0.33750001 W  
PLW13 0.27338001 W

F2 - Processing parameters

SI 32768  
SF 100.6127476 MHz  
WDW EM  
SSB 0  
LB 2.00 Hz  
GB 0  
PC 1.00



2-(2-(2-bromo-4-chlorophenyl)-5-chloro-1H-indol-1-yl)-N-(3-methoxypropyl)benzamide (8w)

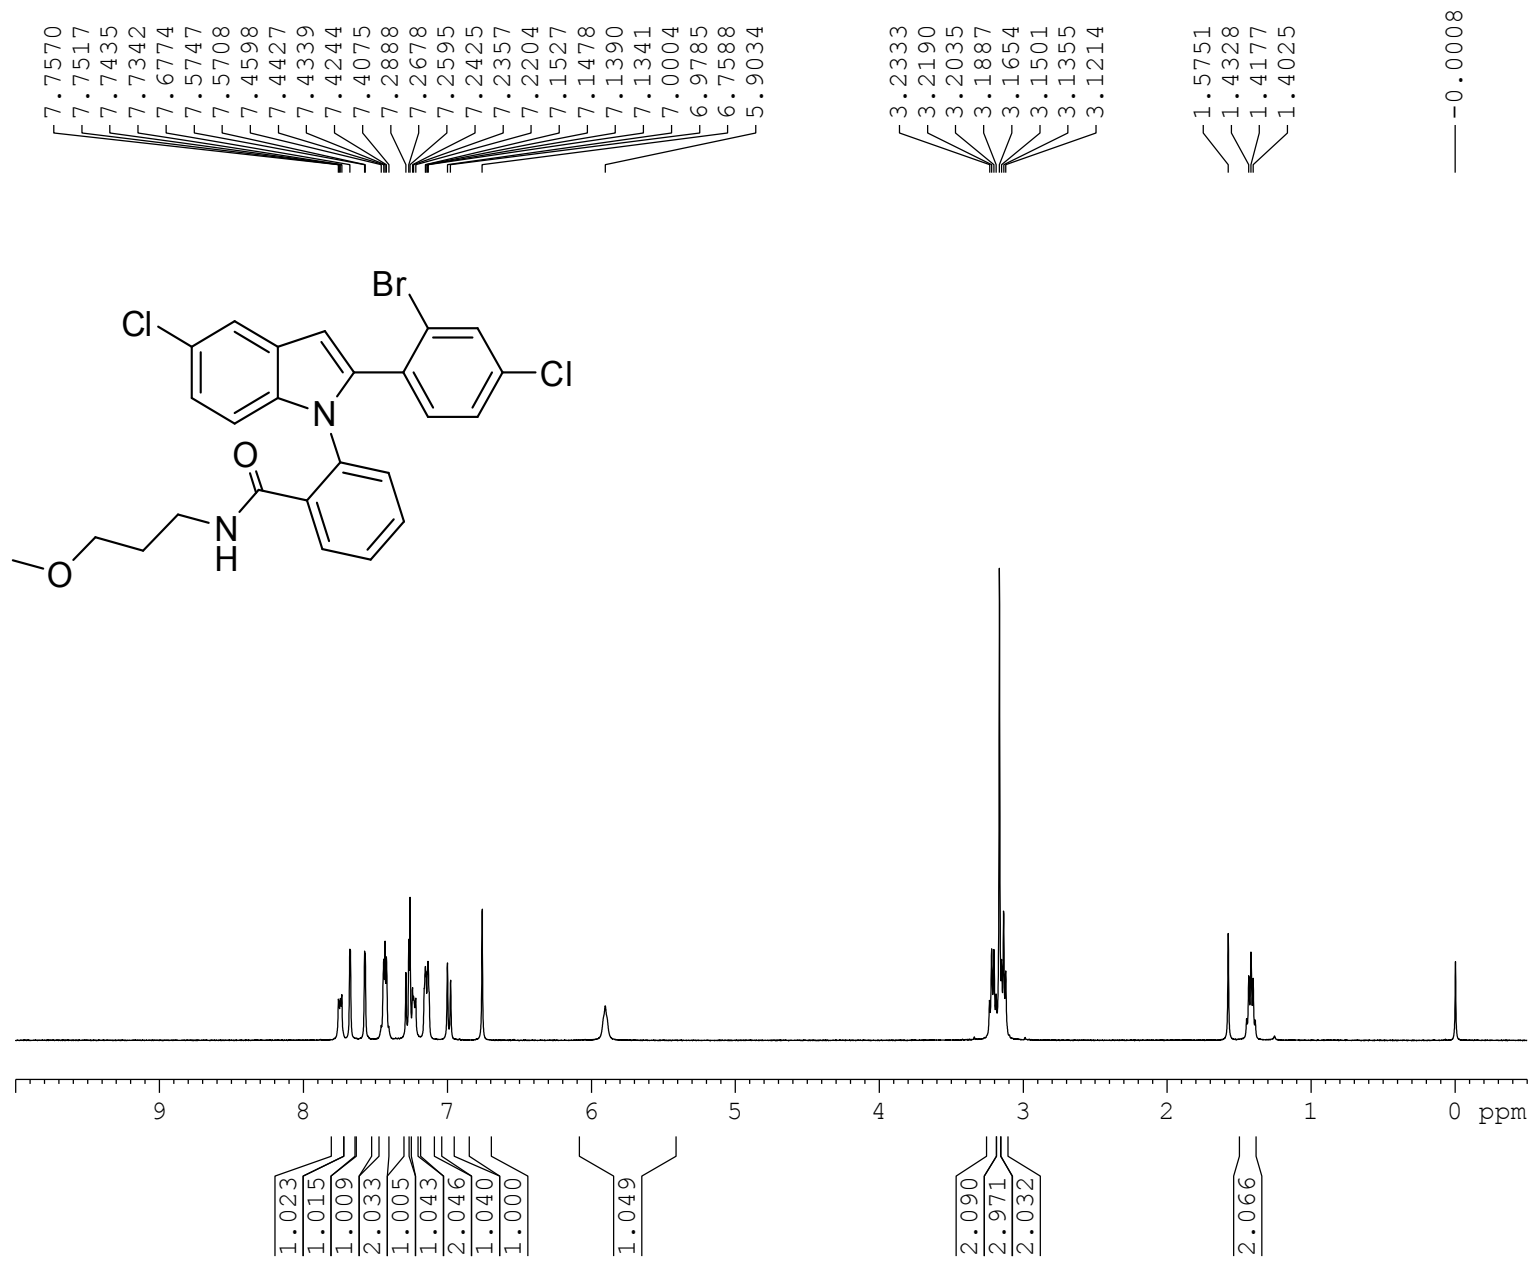

Current Data Parameters  
 NAME project 1  
 EXPNO 200  
 PROCNO 1

F2 - Acquisition Parameters  
 Date\_ 20160215  
 Time 14.52  
 INSTRUM spect  
 PROBHD 5 mm PABBO BB/  
 PULPROG zg30  
 TD 32768  
 SOLVENT CDCl3  
 NS 32  
 DS 0  
 SWH 7211.539 Hz  
 FIDRES 0.220079 Hz  
 AQ 2.2719147 sec  
 RG 198.09  
 DW 69.333 usec  
 DE 10.50 usec  
 TE 297.2 K  
 D1 2.00000000 sec  
 TD0 1

==== CHANNEL f1 =====  
 SFO1 400.1324008 MHz  
 NUC1 1H  
 P1 12.90 usec  
 PLW1 15.00000000 W

F2 - Processing parameters  
 SI 16384  
 SF 400.1300102 MHz  
 WDW EM  
 SSB 0  
 LB 0 Hz  
 GB 0  
 PC 1.00

2-(2-(2-bromo-4-chlorophenyl)-5-chloro-1H-indol-1-yl)-N-(3-methoxypropyl)benzamide (8w)

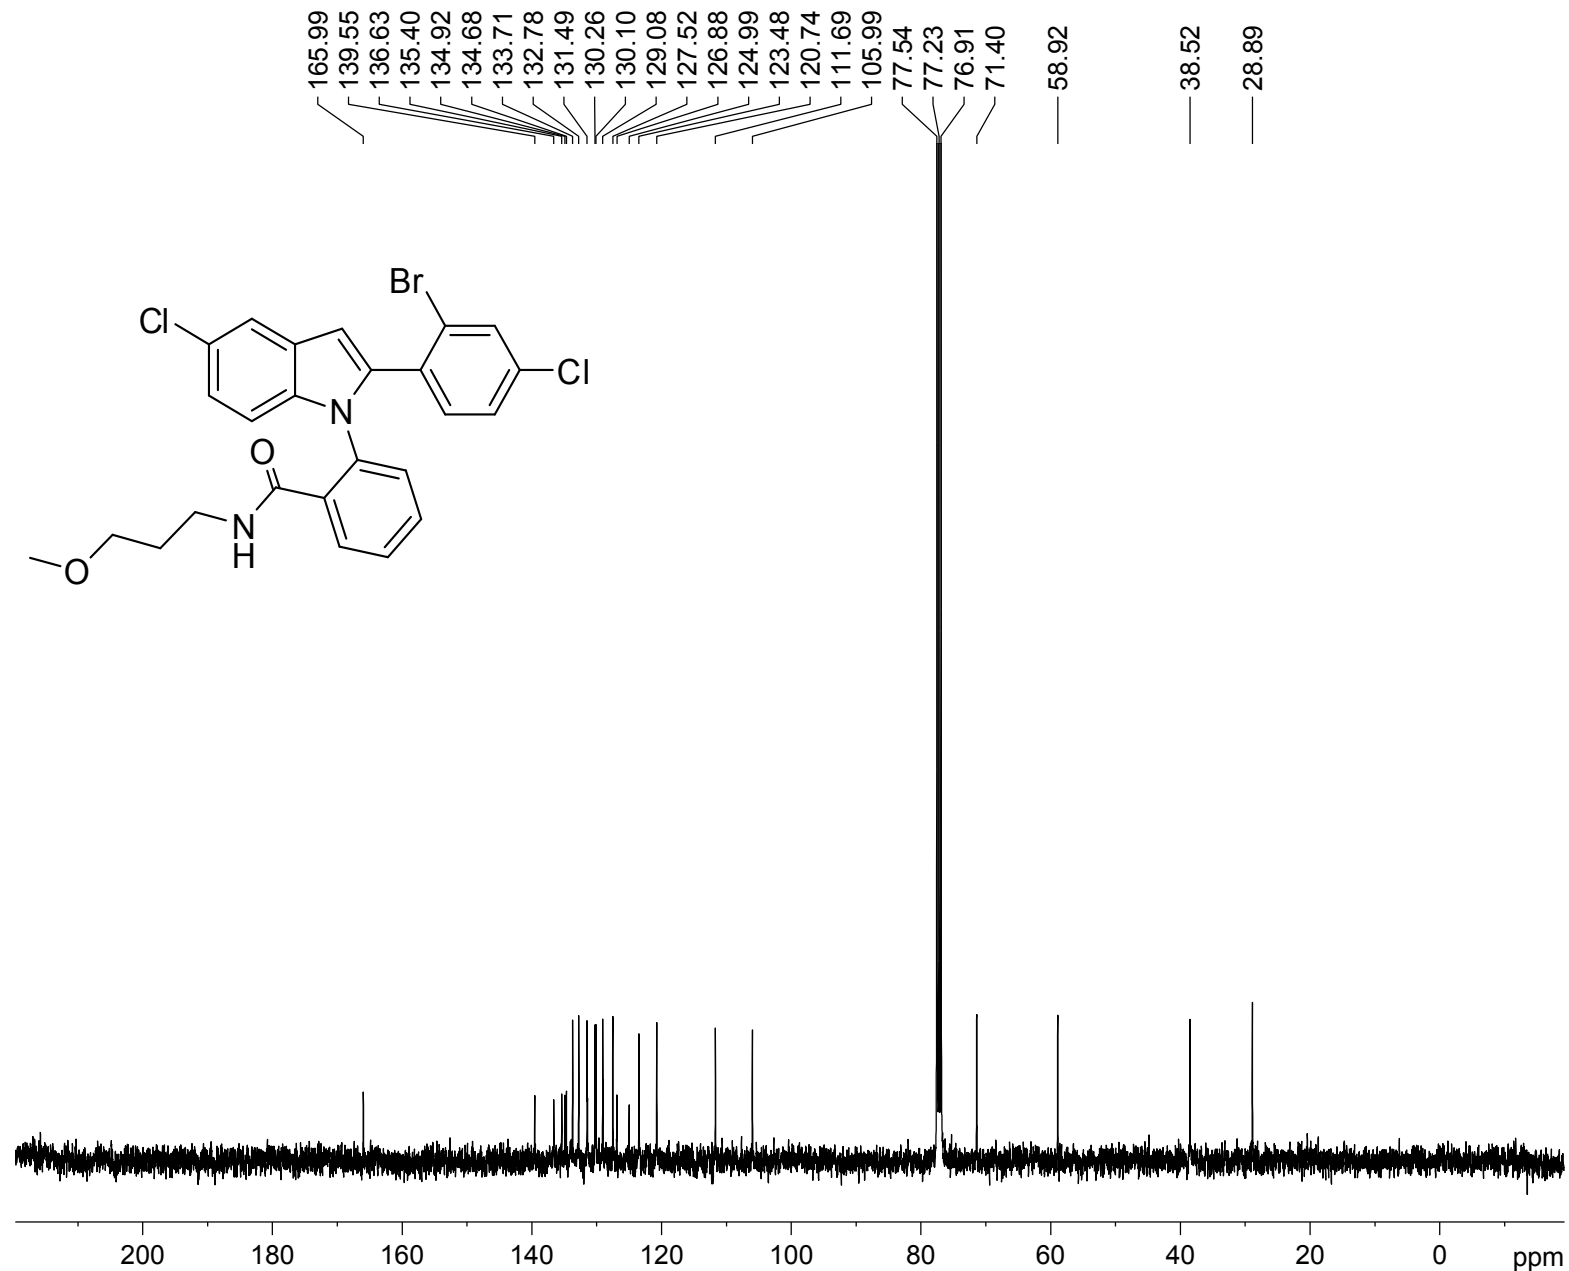

Current Data Parameters

NAME project 1  
EXPNO 195  
PROCNO 1

F2 - Acquisition Parameters

Date\_ 20160215  
Time 13.54  
INSTRUM spect  
PROBHD 5 mm PABBO BB/  
PULPROG zgpg30  
TD 32768  
SOLVENT CDCl3  
NS 299  
DS 0  
SWH 24038.461 Hz  
FIDRES 0.733596 Hz  
AQ 0.6815744 sec  
RG 198.09  
DW 20.800 usec  
DE 6.50 usec  
TE 297.2 K  
D1 2.00000000 sec  
D11 0.03000000 sec  
TD0 1

==== CHANNEL f1 =====

SFO1 100.6228298 MHz  
NUC1 13C  
P1 10.00 usec  
PLW1 47.50000000 W

==== CHANNEL f2 =====

SFO2 400.1316005 MHz  
NUC2 1H  
CPDPRG[2] waltz16  
PCPD2 90.00 usec  
PLW2 15.00000000 W  
PLW12 0.33750001 W  
PLW13 0.27338001 W

F2 - Processing parameters

SI 32768  
SF 100.6127479 MHz  
WDW EM  
SSB 0  
LB 2.00 Hz  
GB 0  
PC 1.00

3,12-dichloro-N-(3-methoxypropyl) indolo[1,2-f]phenanthridine-8-carboxamide (10)

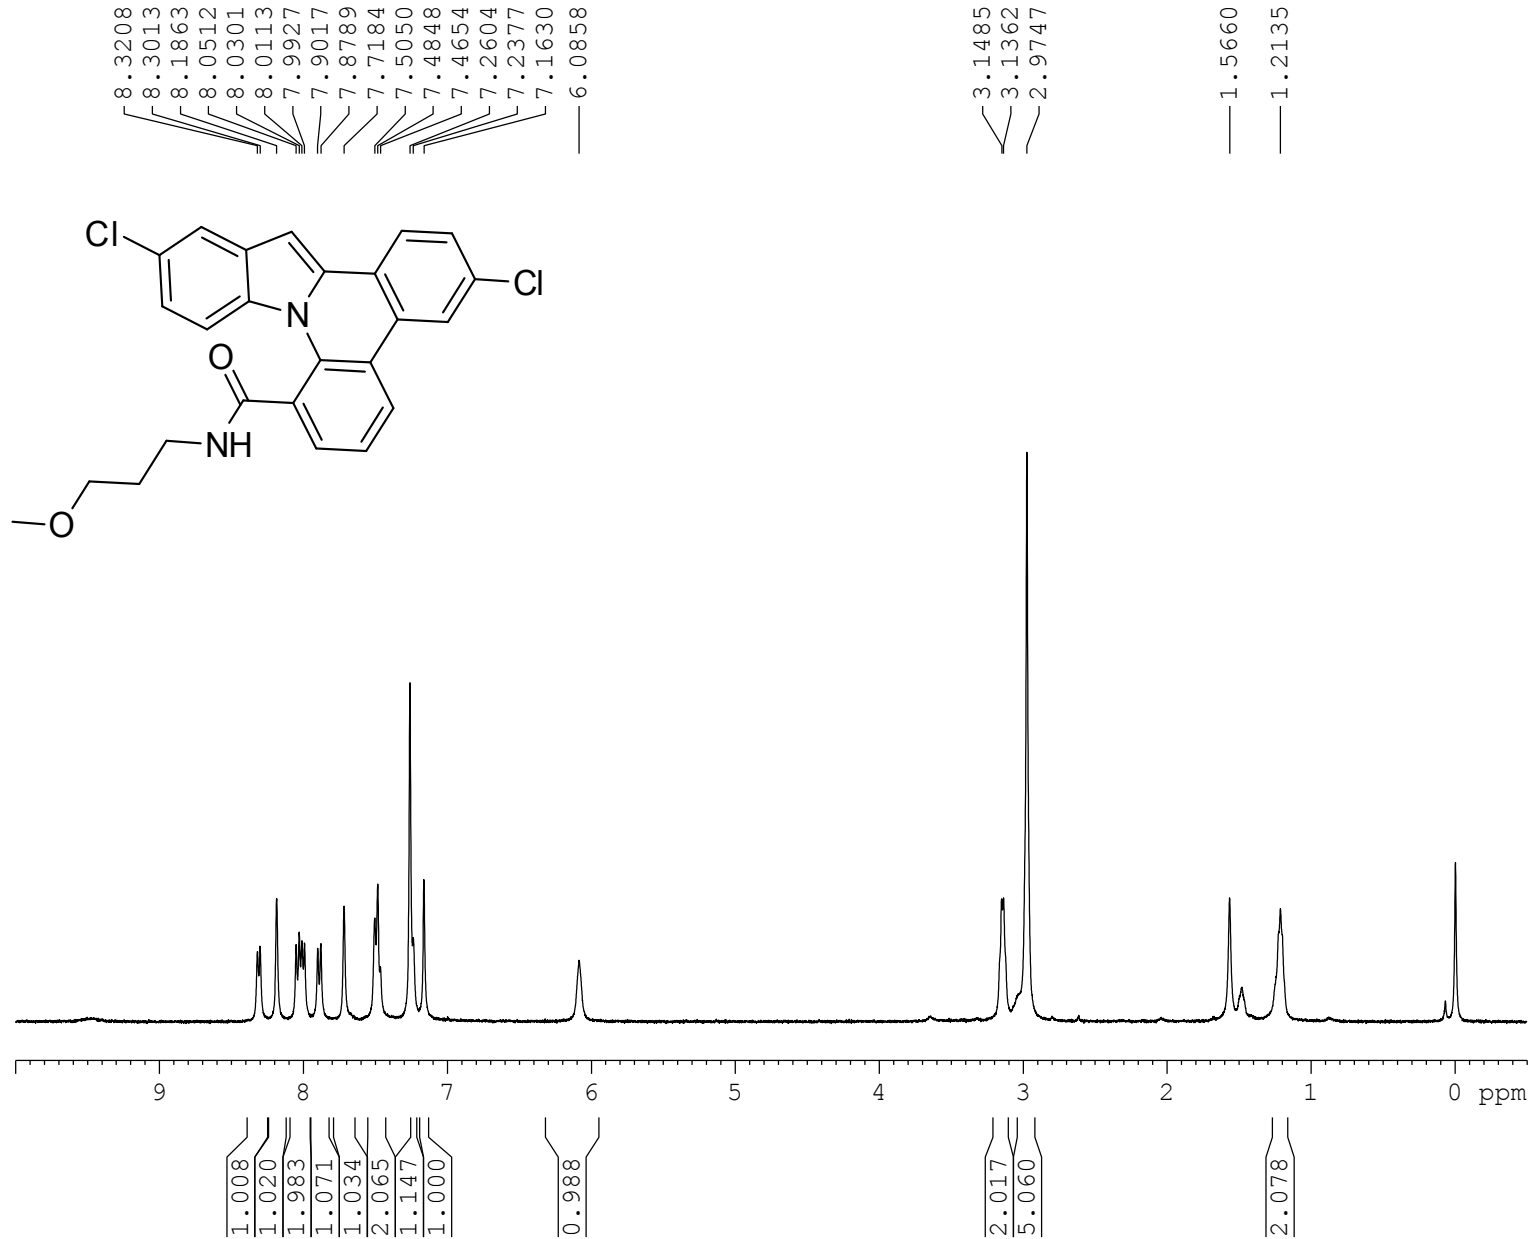

Current Data Parameters  
 NAME project 1  
 EXPNO 162  
 PROCNO 1

F2 - Acquisition Parameters  
 Date\_ 20160203  
 Time 14.57  
 INSTRUM spect  
 PROBHD 5 mm PABBO BB/  
 PULPROG zg30  
 TD 32768  
 SOLVENT CDCl3  
 NS 32  
 DS 0  
 SWH 7211.539 Hz  
 FIDRES 0.220079 Hz  
 AQ 2.2719147 sec  
 RG 198.09  
 DW 69.333 usec  
 DE 10.50 usec  
 TE 297.0 K  
 D1 2.00000000 sec  
 TD0 1

===== CHANNEL f1 =====  
 SFO1 400.1324008 MHz  
 NUC1 1H  
 P1 12.90 usec  
 PLW1 15.00000000 W

F2 - Processing parameters  
 SI 16384  
 SF 400.1300102 MHz  
 WDW EM  
 SSB 0  
 LB 0 Hz  
 GB 0  
 PC 1.00

3,12-dichloro-N-(3-methoxypropyl)indolo[1,2-f]phenanthridine-8-carboxamide (10)

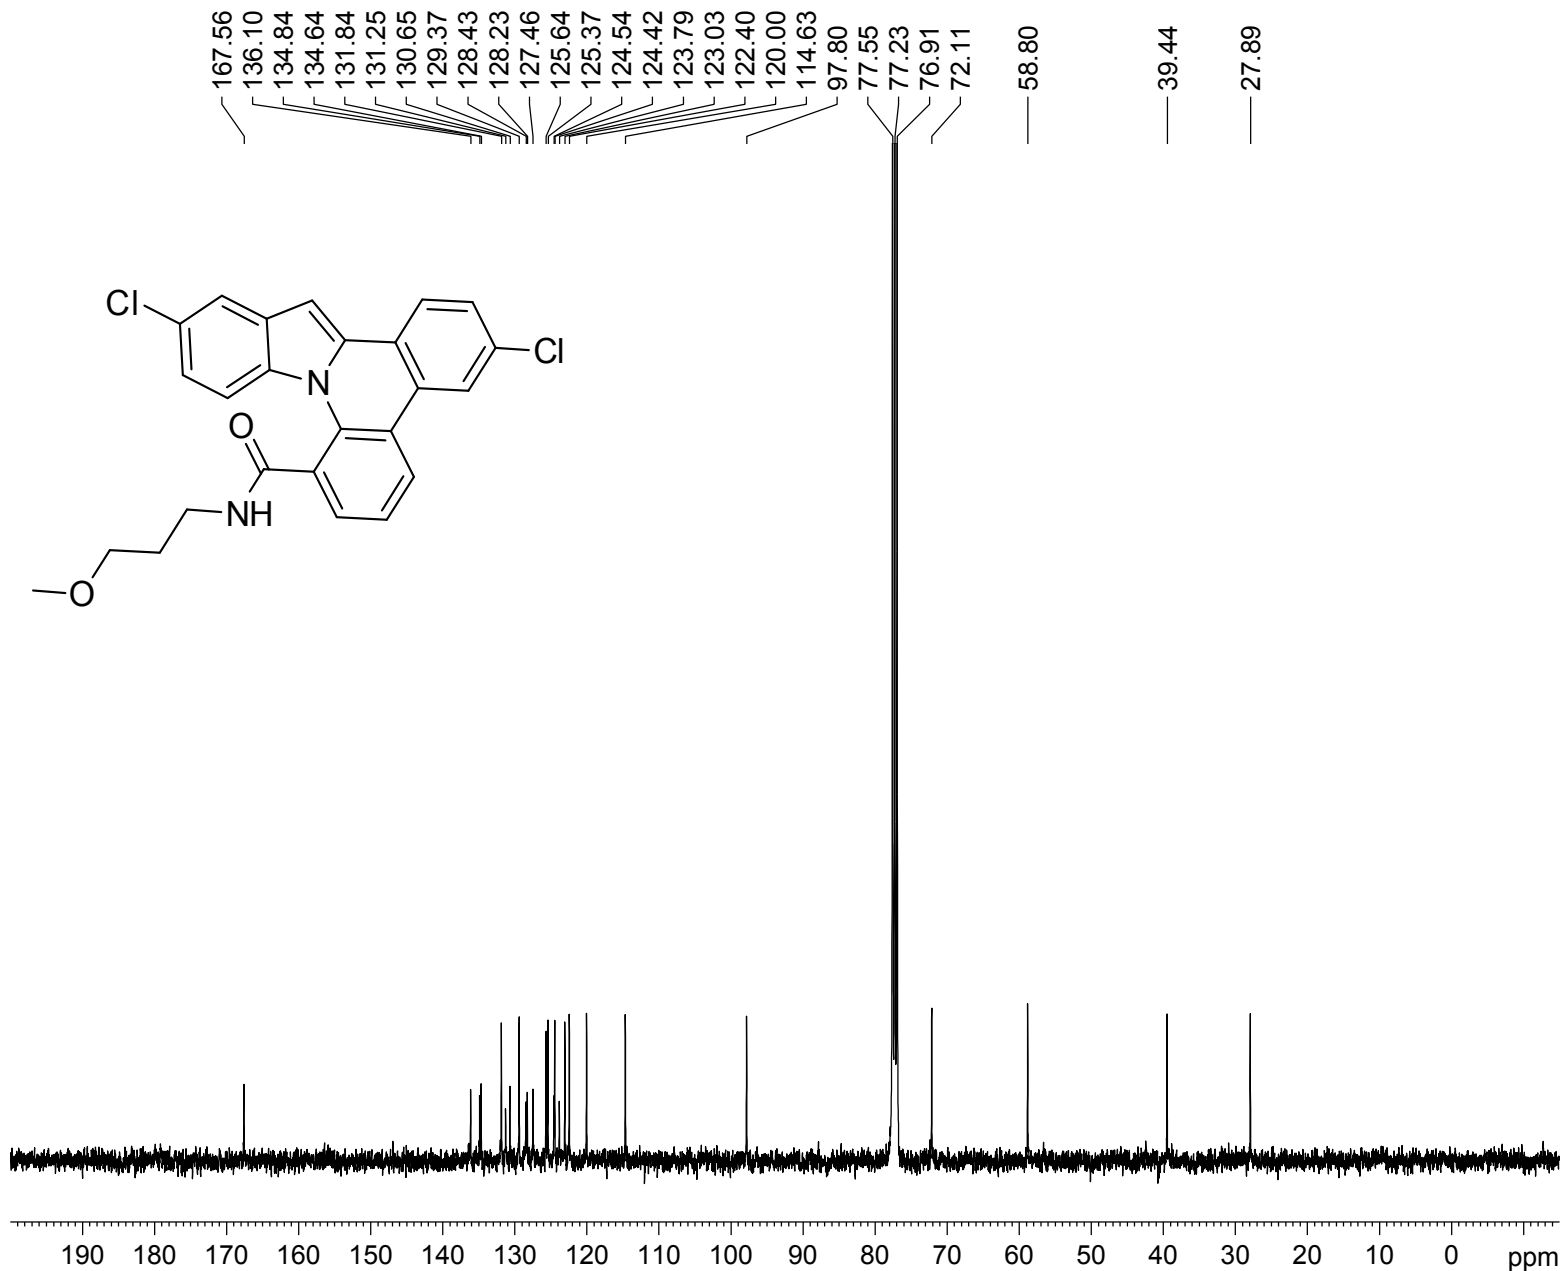

Current Data Parameters

NAME project 1  
 EXPNO 163  
 PROCNO 1

F2 - Acquisition Parameters

Date\_ 20160203  
 Time 15.26  
 INSTRUM spect  
 PROBHD 5 mm PABBO BB/  
 PULPROG zgpg30  
 TD 32768  
 SOLVENT CDCl3  
 NS 1055  
 DS 0  
 SWH 24038.461 Hz  
 FIDRES 0.733596 Hz  
 AQ 0.6815744 sec  
 RG 198.09  
 DW 20.800 usec  
 DE 6.50 usec  
 TE 297.2 K  
 D1 2.00000000 sec  
 D11 0.03000000 sec  
 TD0 1

==== CHANNEL f1 =====

SFO1 100.6228298 MHz  
 NUC1 13C  
 P1 10.00 usec  
 PLW1 47.50000000 W

==== CHANNEL f2 =====

SFO2 400.1316005 MHz  
 NUC2 1H  
 CPDPRG[2] waltz16  
 PCPD2 90.00 usec  
 PLW2 15.00000000 W  
 PLW12 0.33750001 W  
 PLW13 0.27338001 W

F2 - Processing parameters

SI 32768  
 SF 100.6127469 MHz  
 WDW EM  
 SSB 0  
 LB 2.00 Hz  
 GB 0  
 PC 1.00
